# Supplementary material for: Quality Control and Pre-Analysis Treatment of the Environmental Datasets Collected by an Internet Operated Deep-Sea Crawler during Its Entire 7-Year Long Deployment (2009–2016)
Source: Sensors (Basel). 2020 May 25;20(10):2991. doi: 10.3390/s20102991 (PMC7287641; doi:10.3390/s20102991)
Supplement: Supplementary file 1 [file sensors-20-02991-s001.xlsx]

## Sheet: Table S1
Time (UTC)	Pressure (dbar) - CTD	Pressure (dbar) - CTD_SD	Pressure (QF) - CTD	Pressure (dbar) - Aquadopp	Pressure (dbar) - Aquadopp_SD	Pressure (QF) - Aquadopp	Pressure (dbar) - Current Meter	Pressure (dbar) - Current Meter_SD	Pressure (QF) - Current Meter	Temperature (°C) - CTD	Temperature (°C) - CTD_SD	Temperature (QF) - CTD	Temperature (°C) - Aquadopp	Temperature (°C) - Aquadopp_SD	Temperature (QF) - Aquadopp	Temperature (°C) - Current Meter	Temperature (°C) - Current Meter_SD	Temperature (QF) - Current Meter	Temperature (°C) - Mid-Canyon East	Temperature (°C) - Mid-Canyon East_SD	Temperature (QF) - Mid-Canyon East	Conductivity (S/m) - CTD	Conductivity (S/m) - CTD_SD	Conductivity (QF) - CTD	Conductivity (S/m) - Current Meter	Conductivity (S/m) - Current Meter_SD	Conductivity (QF) - Current Meter	Salinity (psu) - CTD	Salinity (psu) - CTD_SD	Salinity (QF) - CTD	Salinity (psu) - Current Meter	Salinity (psu) - Current Meter_SD	Salinity (QF) - Current Meter	Current East (m/s) - Aquadopp	Current East (m/s) - Aquadopp_SD	Current East (QF) - Aquadopp	Current East (m/s) - Current Meter	Current East (m/s) - Current Meter_SD	Current East (QF) - Current Meter	Current North (m/s) - Aquadopp	Current North (m/s) - Aquadopp_SD	Current North (QF) - Aquadopp	Current North (m/s) - Current Meter	Current North (m/s) - Current Meter_SD	Current North (QF) - Current Meter	Current Magnitude (m/s; X-Y) - Current Meter	Current Magnitude (m/s; X-Y) - Current Meter_SD	Current Magnitude (QF; X-Y) - Current Meter	Current Direction (°; X-Y) - Current Meter
2009-12-15 00:30:00	NA	NA	9	NA	NA	9	NA	NA	9	NA	NA	9	NA	NA	9	NA	NA	9	NA	NA	9	NA	NA	9	NA	NA	9	NA	NA	9	NA	NA	9	NA	NA	9	NA	NA	9	NA	NA	9	NA	NA	9	NA	NA	9	NA
2009-12-15 01:30:00	NA	NA	9	NA	NA	9	NA	NA	3	NA	NA	9	NA	NA	9	NA	NA	3	NA	NA	9	NA	NA	9	NA	NA	3	NA	NA	9	NA	NA	3	NA	NA	9	NA	NA	3	NA	NA	9	NA	NA	3	NA	NA	3	NA
2009-12-15 02:30:00	NA	NA	9	NA	NA	9	910.823	0.323059	0	NA	NA	9	NA	NA	9	2.86106	0.012042	0	NA	NA	9	NA	NA	9	3.76046	0.00387616	0	NA	NA	9	41.9899	0.0554934	0	NA	NA	9	0.0654309	0.0160955	0	NA	NA	9	0.0550453	0.0117201	0	0.0859609	0.0178408	0	49.6062
2009-12-15 03:30:00	NA	NA	9	NA	NA	9	911.347	0.368933	0	NA	NA	9	NA	NA	9	2.81393	0.0254337	0	NA	NA	9	NA	NA	9	3.76283	0.00336578	0	NA	NA	9	42.0806	0.0506297	0	NA	NA	9	0.0511351	0.0177699	0	NA	NA	9	0.0262647	0.0183495	0	0.0591398	0.0214355	0	63.9575
2009-12-15 04:30:00	NA	NA	9	NA	NA	9	911.886	0.355041	0	NA	NA	9	NA	NA	9	2.80358	0.013006	0	NA	NA	9	NA	NA	9	3.76745	0.00398755	0	NA	NA	9	42.1516	0.0446636	0	NA	NA	9	0.0183936	0.0206713	0	NA	NA	9	0.00515235	0.00829554	0	0.0252043	0.0150195	0	110.205
2009-12-15 05:30:00	NA	NA	9	NA	NA	9	912.38	0.344325	0	NA	NA	9	NA	NA	9	2.82138	0.0173699	0	NA	NA	9	NA	NA	9	3.77072	0.00330641	0	NA	NA	9	42.1691	0.0441437	0	NA	NA	9	-0.00283676	0.0145503	0	NA	NA	9	0.0181048	0.00762345	0	0.0224195	0.0101455	0	167.119
2009-12-15 06:30:00	NA	NA	9	NA	NA	9	912.927	0.328446	0	NA	NA	9	NA	NA	9	2.82491	0.0162181	0	NA	NA	9	NA	NA	9	3.77075	0.00356297	0	NA	NA	9	42.1645	0.0463655	0	NA	NA	9	-0.0333507	0.0134102	0	NA	NA	9	0.0318193	0.0099497	0	0.0471971	0.0132644	0	312.767
2009-12-15 07:30:00	NA	NA	9	NA	NA	9	913.079	0.319039	0	NA	NA	9	NA	NA	9	2.87578	0.0314457	0	NA	NA	9	NA	NA	9	3.77607	0.00363003	0	NA	NA	9	42.1648	0.0497748	0	NA	NA	9	-0.00542212	0.0252543	0	NA	NA	9	0.0212806	0.0145406	0	0.0333262	0.014849	0	230.226
2009-12-15 08:30:00	NA	NA	9	NA	NA	9	913.221	0.321383	0	NA	NA	9	NA	NA	9	2.83303	0.018254	0	NA	NA	9	NA	NA	9	3.77598	0.00375642	0	NA	NA	9	42.2193	0.050607	0	NA	NA	9	0.0136545	0.0299532	0	NA	NA	9	0.0303757	0.0117672	0	0.0411946	0.0211534	0	180.226
2009-12-15 09:30:00	NA	NA	9	NA	NA	9	913.031	0.306402	0	NA	NA	9	NA	NA	9	2.80691	0.0143114	0	NA	NA	9	NA	NA	9	3.77358	0.00316401	0	NA	NA	9	42.2234	0.0421673	0	NA	NA	9	-0.0239126	0.0155744	0	NA	NA	9	0.0290528	0.00929173	0	0.039545	0.0134495	0	303.117
2009-12-15 10:30:00	NA	NA	9	NA	NA	9	912.757	0.308486	0	NA	NA	9	NA	NA	9	2.82941	0.0180707	0	NA	NA	9	NA	NA	9	3.77589	0.00289123	0	NA	NA	9	42.2232	0.0389702	0	NA	NA	9	-0.051914	0.0268725	0	NA	NA	9	0.0372341	0.0149031	0	0.0667714	0.0238127	0	304.695
2009-12-15 11:30:00	NA	NA	9	NA	NA	9	912.456	0.349224	0	NA	NA	9	NA	NA	9	2.82718	0.015185	0	NA	NA	9	NA	NA	9	3.77722	0.00300989	0	NA	NA	9	42.243	0.03923	0	NA	NA	9	-0.0606741	0.0285735	0	NA	NA	9	0.0384838	0.015683	0	0.0744345	0.0261544	0	303.847
2009-12-15 12:30:00	NA	NA	9	NA	NA	9	912.156	0.310438	0	NA	NA	9	NA	NA	9	2.85485	0.0210265	0	NA	NA	9	NA	NA	9	3.78135	0.00428989	0	NA	NA	9	42.2587	0.0459705	0	NA	NA	9	-0.0258581	0.0175339	0	NA	NA	9	0.0219828	0.0133215	0	0.0365545	0.0173335	0	302.003
2009-12-15 13:30:00	NA	NA	9	NA	NA	9	912.146	0.315097	0	NA	NA	9	NA	NA	9	2.84121	0.0185021	0	NA	NA	9	NA	NA	9	3.78119	0.00296972	0	NA	NA	9	42.2746	0.0440636	0	NA	NA	9	-0.0356269	0.0173184	0	NA	NA	9	-0.0125046	0.0222041	0	0.0440447	0.0166836	0	251.234
2009-12-15 14:30:00	NA	NA	9	NA	NA	9	NA	NA	9	NA	NA	9	NA	NA	9	NA	NA	9	NA	NA	9	NA	NA	9	NA	NA	9	NA	NA	9	NA	NA	9	NA	NA	9	NA	NA	9	NA	NA	9	NA	NA	9	NA	NA	9	NA
2009-12-15 15:30:00	NA	NA	9	NA	NA	9	NA	NA	3	NA	NA	9	NA	NA	9	NA	NA	3	NA	NA	9	NA	NA	9	NA	NA	3	NA	NA	9	NA	NA	3	NA	NA	9	NA	NA	3	NA	NA	9	NA	NA	3	NA	NA	3	NA
2009-12-15 16:30:00	NA	NA	9	NA	NA	9	913.268	0.332841	0	NA	NA	9	NA	NA	9	2.9228	0.0209461	0	NA	NA	9	NA	NA	9	3.77805	0.00465056	0	NA	NA	9	42.1281	0.0606218	0	NA	NA	9	-0.0407527	0.0237477	0	NA	NA	9	-0.0307439	0.0122939	0	0.0533604	0.0217622	0	229.297
2009-12-15 17:30:00	NA	NA	9	NA	NA	9	913.624	0.343645	0	NA	NA	9	NA	NA	9	2.92405	0.0118519	0	NA	NA	9	NA	NA	9	3.78418	0.00311314	0	NA	NA	9	42.2029	0.0398013	0	NA	NA	9	-0.0879147	0.016656	0	NA	NA	9	-0.0432096	0.0156124	0	0.0989654	0.0179709	0	243.949
2009-12-15 18:30:00	NA	NA	9	NA	NA	9	913.838	0.318138	0	NA	NA	9	NA	NA	9	2.90859	0.0157703	0	NA	NA	9	NA	NA	9	3.78515	0.00324513	0	NA	NA	9	42.2351	0.0404077	0	NA	NA	9	-0.0475974	0.0291324	0	NA	NA	9	-0.0639349	0.0270999	0	0.0831587	0.031947	0	216.104
2009-12-15 19:30:00	NA	NA	9	NA	NA	9	913.779	0.32525	0	NA	NA	9	NA	NA	9	2.95436	0.0158415	0	NA	NA	9	NA	NA	9	3.78994	0.00337529	0	NA	NA	9	42.2353	0.0396535	0	NA	NA	9	-0.0790646	0.0316797	0	NA	NA	9	-0.0358066	0.020306	0	0.0889661	0.0321569	0	244.999
2009-12-15 20:30:00	NA	NA	9	NA	NA	9	913.289	0.338685	0	NA	NA	9	NA	NA	9	2.9949	0.0152318	0	NA	NA	9	NA	NA	9	3.79373	0.00301196	0	NA	NA	9	42.2301	0.0387444	0	NA	NA	9	-0.124823	0.0241752	0	NA	NA	9	-0.0725115	0.0215249	0	0.145615	0.0261264	0	239.87
2009-12-15 21:30:00	NA	NA	9	NA	NA	9	912.909	0.394531	0	NA	NA	9	NA	NA	9	2.93654	0.0209781	0	NA	NA	9	NA	NA	9	3.79044	0.00299171	0	NA	NA	9	42.2654	0.0410048	0	NA	NA	9	-0.116047	0.0273926	0	NA	NA	9	-0.0919669	0.015762	0	0.149585	0.0234027	0	230.904
2009-12-15 22:30:00	NA	NA	9	NA	NA	9	912.101	0.413165	0	NA	NA	9	NA	NA	9	2.96008	0.0405712	0	NA	NA	9	NA	NA	9	3.79347	0.00420925	0	NA	NA	9	42.273	0.0422098	0	NA	NA	9	-0.0800336	0.0269053	0	NA	NA	9	-0.0563874	0.0287611	0	0.102887	0.0234442	0	234.725
2009-12-15 23:30:00	NA	NA	9	NA	NA	9	911.354	0.342599	0	NA	NA	9	NA	NA	9	2.96679	0.0150197	0	NA	NA	9	NA	NA	9	3.795	0.0032673	0	NA	NA	9	42.2838	0.0426487	0	NA	NA	9	-0.0748051	0.0170963	0	NA	NA	9	-0.0651833	0.0140673	0	0.100331	0.0163812	0	228.582
2009-12-16 00:30:00	NA	NA	9	NA	NA	9	910.737	0.311795	0	NA	NA	9	NA	NA	9	2.97865	0.0131275	0	NA	NA	9	NA	NA	9	3.79688	0.00312658	0	NA	NA	9	42.2922	0.0417817	0	NA	NA	9	-0.0264001	0.0217827	0	NA	NA	9	-0.0041825	0.0381464	0	0.0461753	0.0226084	0	250.058
2009-12-16 01:30:00	NA	NA	9	NA	NA	9	910.497	0.321306	0	NA	NA	9	NA	NA	9	2.94271	0.0141886	0	NA	NA	9	NA	NA	9	3.79359	0.0153026	0	NA	NA	9	42.2982	0.18871	0	NA	NA	9	-0.0144885	0.0106324	0	NA	NA	9	0.04647	0.0156265	0	0.0503096	0.0139812	0	317.173
2009-12-16 02:30:00	NA	NA	9	NA	NA	9	NA	NA	3	NA	NA	9	NA	NA	9	NA	NA	3	NA	NA	9	NA	NA	9	NA	NA	3	NA	NA	9	NA	NA	3	NA	NA	9	NA	NA	3	NA	NA	9	NA	NA	3	NA	NA	3	NA
2009-12-16 03:30:00	NA	NA	9	NA	NA	9	NA	NA	9	NA	NA	9	NA	NA	9	NA	NA	9	NA	NA	9	NA	NA	9	NA	NA	9	NA	NA	9	NA	NA	9	NA	NA	9	NA	NA	9	NA	NA	9	NA	NA	9	NA	NA	9	NA
2009-12-16 04:30:00	NA	NA	9	NA	NA	9	NA	NA	9	NA	NA	9	NA	NA	9	NA	NA	9	NA	NA	9	NA	NA	9	NA	NA	9	NA	NA	9	NA	NA	9	NA	NA	9	NA	NA	9	NA	NA	9	NA	NA	9	NA	NA	9	NA
2009-12-16 05:30:00	NA	NA	9	NA	NA	9	NA	NA	9	NA	NA	9	NA	NA	9	NA	NA	9	NA	NA	9	NA	NA	9	NA	NA	9	NA	NA	9	NA	NA	9	NA	NA	9	NA	NA	9	NA	NA	9	NA	NA	9	NA	NA	9	NA
2009-12-16 06:30:00	NA	NA	9	NA	NA	9	NA	NA	9	NA	NA	9	NA	NA	9	NA	NA	9	NA	NA	9	NA	NA	9	NA	NA	9	NA	NA	9	NA	NA	9	NA	NA	9	NA	NA	9	NA	NA	9	NA	NA	9	NA	NA	9	NA
2009-12-16 07:30:00	NA	NA	9	NA	NA	9	NA	NA	9	NA	NA	9	NA	NA	9	NA	NA	9	NA	NA	9	NA	NA	9	NA	NA	9	NA	NA	9	NA	NA	9	NA	NA	9	NA	NA	9	NA	NA	9	NA	NA	9	NA	NA	9	NA
2009-12-16 08:30:00	NA	NA	9	NA	NA	9	NA	NA	9	NA	NA	9	NA	NA	9	NA	NA	9	NA	NA	9	NA	NA	9	NA	NA	9	NA	NA	9	NA	NA	9	NA	NA	9	NA	NA	9	NA	NA	9	NA	NA	9	NA	NA	9	NA
2009-12-16 09:30:00	NA	NA	9	NA	NA	9	NA	NA	9	NA	NA	9	NA	NA	9	NA	NA	9	NA	NA	9	NA	NA	9	NA	NA	9	NA	NA	9	NA	NA	9	NA	NA	9	NA	NA	9	NA	NA	9	NA	NA	9	NA	NA	9	NA
2009-12-16 10:30:00	NA	NA	9	NA	NA	9	NA	NA	9	NA	NA	9	NA	NA	9	NA	NA	9	NA	NA	9	NA	NA	9	NA	NA	9	NA	NA	9	NA	NA	9	NA	NA	9	NA	NA	9	NA	NA	9	NA	NA	9	NA	NA	9	NA
2009-12-16 11:30:00	NA	NA	9	NA	NA	9	NA	NA	9	NA	NA	9	NA	NA	9	NA	NA	9	NA	NA	9	NA	NA	9	NA	NA	9	NA	NA	9	NA	NA	9	NA	NA	9	NA	NA	9	NA	NA	9	NA	NA	9	NA	NA	9	NA
2009-12-16 12:30:00	NA	NA	9	NA	NA	9	NA	NA	9	NA	NA	9	NA	NA	9	NA	NA	9	NA	NA	9	NA	NA	9	NA	NA	9	NA	NA	9	NA	NA	9	NA	NA	9	NA	NA	9	NA	NA	9	NA	NA	9	NA	NA	9	NA
2009-12-16 13:30:00	NA	NA	9	NA	NA	9	NA	NA	9	NA	NA	9	NA	NA	9	NA	NA	9	NA	NA	9	NA	NA	9	NA	NA	9	NA	NA	9	NA	NA	9	NA	NA	9	NA	NA	9	NA	NA	9	NA	NA	9	NA	NA	9	NA
2009-12-16 14:30:00	NA	NA	9	NA	NA	9	NA	NA	9	NA	NA	9	NA	NA	9	NA	NA	9	NA	NA	9	NA	NA	9	NA	NA	9	NA	NA	9	NA	NA	9	NA	NA	9	NA	NA	9	NA	NA	9	NA	NA	9	NA	NA	9	NA
2009-12-16 15:30:00	NA	NA	9	NA	NA	9	NA	NA	9	NA	NA	9	NA	NA	9	NA	NA	9	NA	NA	9	NA	NA	9	NA	NA	9	NA	NA	9	NA	NA	9	NA	NA	9	NA	NA	9	NA	NA	9	NA	NA	9	NA	NA	9	NA
2009-12-16 16:30:00	NA	NA	9	NA	NA	9	NA	NA	9	NA	NA	9	NA	NA	9	NA	NA	9	NA	NA	9	NA	NA	9	NA	NA	9	NA	NA	9	NA	NA	9	NA	NA	9	NA	NA	9	NA	NA	9	NA	NA	9	NA	NA	9	NA
2009-12-16 17:30:00	NA	NA	9	NA	NA	9	NA	NA	9	NA	NA	9	NA	NA	9	NA	NA	9	NA	NA	9	NA	NA	9	NA	NA	9	NA	NA	9	NA	NA	9	NA	NA	9	NA	NA	9	NA	NA	9	NA	NA	9	NA	NA	9	NA
2009-12-16 18:30:00	NA	NA	9	NA	NA	9	NA	NA	9	NA	NA	9	NA	NA	9	NA	NA	9	NA	NA	9	NA	NA	9	NA	NA	9	NA	NA	9	NA	NA	9	NA	NA	9	NA	NA	9	NA	NA	9	NA	NA	9	NA	NA	9	NA
2009-12-16 19:30:00	NA	NA	9	NA	NA	9	NA	NA	9	NA	NA	9	NA	NA	9	NA	NA	9	NA	NA	9	NA	NA	9	NA	NA	9	NA	NA	9	NA	NA	9	NA	NA	9	NA	NA	9	NA	NA	9	NA	NA	9	NA	NA	9	NA
2009-12-16 20:30:00	NA	NA	9	NA	NA	9	NA	NA	9	NA	NA	9	NA	NA	9	NA	NA	9	NA	NA	9	NA	NA	9	NA	NA	9	NA	NA	9	NA	NA	9	NA	NA	9	NA	NA	9	NA	NA	9	NA	NA	9	NA	NA	9	NA
2009-12-16 21:30:00	NA	NA	9	NA	NA	9	NA	NA	9	NA	NA	9	NA	NA	9	NA	NA	9	NA	NA	9	NA	NA	9	NA	NA	9	NA	NA	9	NA	NA	9	NA	NA	9	NA	NA	9	NA	NA	9	NA	NA	9	NA	NA	9	NA
2009-12-16 22:30:00	NA	NA	9	NA	NA	9	NA	NA	9	NA	NA	9	NA	NA	9	NA	NA	9	NA	NA	9	NA	NA	9	NA	NA	9	NA	NA	9	NA	NA	9	NA	NA	9	NA	NA	9	NA	NA	9	NA	NA	9	NA	NA	9	NA
2009-12-16 23:30:00	NA	NA	9	NA	NA	9	NA	NA	9	NA	NA	9	NA	NA	9	NA	NA	9	NA	NA	9	NA	NA	9	NA	NA	9	NA	NA	9	NA	NA	9	NA	NA	9	NA	NA	9	NA	NA	9	NA	NA	9	NA	NA	9	NA
2009-12-17 00:30:00	NA	NA	9	NA	NA	9	NA	NA	9	NA	NA	9	NA	NA	9	NA	NA	9	NA	NA	9	NA	NA	9	NA	NA	9	NA	NA	9	NA	NA	9	NA	NA	9	NA	NA	9	NA	NA	9	NA	NA	9	NA	NA	9	NA
2009-12-17 01:30:00	NA	NA	9	NA	NA	9	NA	NA	9	NA	NA	9	NA	NA	9	NA	NA	9	NA	NA	9	NA	NA	9	NA	NA	9	NA	NA	9	NA	NA	9	NA	NA	9	NA	NA	9	NA	NA	9	NA	NA	9	NA	NA	9	NA
2009-12-17 02:30:00	NA	NA	9	NA	NA	9	NA	NA	9	NA	NA	9	NA	NA	9	NA	NA	9	NA	NA	9	NA	NA	9	NA	NA	9	NA	NA	9	NA	NA	9	NA	NA	9	NA	NA	9	NA	NA	9	NA	NA	9	NA	NA	9	NA
2009-12-17 03:30:00	NA	NA	9	NA	NA	9	NA	NA	9	NA	NA	9	NA	NA	9	NA	NA	9	NA	NA	9	NA	NA	9	NA	NA	9	NA	NA	9	NA	NA	9	NA	NA	9	NA	NA	9	NA	NA	9	NA	NA	9	NA	NA	9	NA
2009-12-17 04:30:00	NA	NA	9	NA	NA	9	NA	NA	9	NA	NA	9	NA	NA	9	NA	NA	9	NA	NA	9	NA	NA	9	NA	NA	9	NA	NA	9	NA	NA	9	NA	NA	9	NA	NA	9	NA	NA	9	NA	NA	9	NA	NA	9	NA
2009-12-17 05:30:00	NA	NA	9	NA	NA	9	NA	NA	9	NA	NA	9	NA	NA	9	NA	NA	9	NA	NA	9	NA	NA	9	NA	NA	9	NA	NA	9	NA	NA	9	NA	NA	9	NA	NA	9	NA	NA	9	NA	NA	9	NA	NA	9	NA
2009-12-17 06:30:00	NA	NA	9	NA	NA	9	NA	NA	9	NA	NA	9	NA	NA	9	NA	NA	9	NA	NA	9	NA	NA	9	NA	NA	9	NA	NA	9	NA	NA	9	NA	NA	9	NA	NA	9	NA	NA	9	NA	NA	9	NA	NA	9	NA
2009-12-17 07:30:00	NA	NA	9	NA	NA	9	NA	NA	9	NA	NA	9	NA	NA	9	NA	NA	9	NA	NA	9	NA	NA	9	NA	NA	9	NA	NA	9	NA	NA	9	NA	NA	9	NA	NA	9	NA	NA	9	NA	NA	9	NA	NA	9	NA
2009-12-17 08:30:00	NA	NA	9	NA	NA	9	NA	NA	9	NA	NA	9	NA	NA	9	NA	NA	9	NA	NA	9	NA	NA	9	NA	NA	9	NA	NA	9	NA	NA	9	NA	NA	9	NA	NA	9	NA	NA	9	NA	NA	9	NA	NA	9	NA
2009-12-17 09:30:00	NA	NA	9	NA	NA	9	NA	NA	9	NA	NA	9	NA	NA	9	NA	NA	9	NA	NA	9	NA	NA	9	NA	NA	9	NA	NA	9	NA	NA	9	NA	NA	9	NA	NA	9	NA	NA	9	NA	NA	9	NA	NA	9	NA
2009-12-17 10:30:00	NA	NA	9	NA	NA	9	NA	NA	9	NA	NA	9	NA	NA	9	NA	NA	9	NA	NA	9	NA	NA	9	NA	NA	9	NA	NA	9	NA	NA	9	NA	NA	9	NA	NA	9	NA	NA	9	NA	NA	9	NA	NA	9	NA
2009-12-17 11:30:00	NA	NA	9	NA	NA	9	NA	NA	9	NA	NA	9	NA	NA	9	NA	NA	9	NA	NA	9	NA	NA	9	NA	NA	9	NA	NA	9	NA	NA	9	NA	NA	9	NA	NA	9	NA	NA	9	NA	NA	9	NA	NA	9	NA
2009-12-17 12:30:00	NA	NA	9	NA	NA	9	NA	NA	9	NA	NA	9	NA	NA	9	NA	NA	9	NA	NA	9	NA	NA	9	NA	NA	9	NA	NA	9	NA	NA	9	NA	NA	9	NA	NA	9	NA	NA	9	NA	NA	9	NA	NA	9	NA
2009-12-17 13:30:00	NA	NA	9	NA	NA	9	NA	NA	9	NA	NA	9	NA	NA	9	NA	NA	9	NA	NA	9	NA	NA	9	NA	NA	9	NA	NA	9	NA	NA	9	NA	NA	9	NA	NA	9	NA	NA	9	NA	NA	9	NA	NA	9	NA
2009-12-17 14:30:00	NA	NA	9	NA	NA	9	NA	NA	9	NA	NA	9	NA	NA	9	NA	NA	9	NA	NA	9	NA	NA	9	NA	NA	9	NA	NA	9	NA	NA	9	NA	NA	9	NA	NA	9	NA	NA	9	NA	NA	9	NA	NA	9	NA
2009-12-17 15:30:00	NA	NA	9	NA	NA	9	NA	NA	9	NA	NA	9	NA	NA	9	NA	NA	9	NA	NA	9	NA	NA	9	NA	NA	9	NA	NA	9	NA	NA	9	NA	NA	9	NA	NA	9	NA	NA	9	NA	NA	9	NA	NA	9	NA
2009-12-17 16:30:00	NA	NA	9	NA	NA	9	NA	NA	9	NA	NA	9	NA	NA	9	NA	NA	9	NA	NA	9	NA	NA	9	NA	NA	9	NA	NA	9	NA	NA	9	NA	NA	9	NA	NA	9	NA	NA	9	NA	NA	9	NA	NA	9	NA
2009-12-17 17:30:00	NA	NA	9	NA	NA	9	NA	NA	9	NA	NA	9	NA	NA	9	NA	NA	9	NA	NA	9	NA	NA	9	NA	NA	9	NA	NA	9	NA	NA	9	NA	NA	9	NA	NA	9	NA	NA	9	NA	NA	9	NA	NA	9	NA
2009-12-17 18:30:00	NA	NA	9	NA	NA	9	NA	NA	9	NA	NA	9	NA	NA	9	NA	NA	9	NA	NA	9	NA	NA	9	NA	NA	9	NA	NA	9	NA	NA	9	NA	NA	9	NA	NA	9	NA	NA	9	NA	NA	9	NA	NA	9	NA
2009-12-17 19:30:00	NA	NA	9	NA	NA	9	NA	NA	9	NA	NA	9	NA	NA	9	NA	NA	9	NA	NA	9	NA	NA	9	NA	NA	9	NA	NA	9	NA	NA	9	NA	NA	9	NA	NA	9	NA	NA	9	NA	NA	9	NA	NA	9	NA
2009-12-17 20:30:00	NA	NA	9	NA	NA	9	NA	NA	9	NA	NA	9	NA	NA	9	NA	NA	9	NA	NA	9	NA	NA	9	NA	NA	9	NA	NA	9	NA	NA	9	NA	NA	9	NA	NA	9	NA	NA	9	NA	NA	9	NA	NA	9	NA
2009-12-17 21:30:00	NA	NA	9	NA	NA	9	NA	NA	9	NA	NA	9	NA	NA	9	NA	NA	9	NA	NA	9	NA	NA	9	NA	NA	9	NA	NA	9	NA	NA	9	NA	NA	9	NA	NA	9	NA	NA	9	NA	NA	9	NA	NA	9	NA
2009-12-17 22:30:00	NA	NA	9	NA	NA	9	NA	NA	9	NA	NA	9	NA	NA	9	NA	NA	9	NA	NA	9	NA	NA	9	NA	NA	9	NA	NA	9	NA	NA	9	NA	NA	9	NA	NA	9	NA	NA	9	NA	NA	9	NA	NA	9	NA
2009-12-17 23:30:00	NA	NA	9	NA	NA	9	NA	NA	9	NA	NA	9	NA	NA	9	NA	NA	9	NA	NA	9	NA	NA	9	NA	NA	9	NA	NA	9	NA	NA	9	NA	NA	9	NA	NA	9	NA	NA	9	NA	NA	9	NA	NA	9	NA
2009-12-18 00:30:00	NA	NA	9	NA	NA	9	NA	NA	9	NA	NA	9	NA	NA	9	NA	NA	9	NA	NA	9	NA	NA	9	NA	NA	9	NA	NA	9	NA	NA	9	NA	NA	9	NA	NA	9	NA	NA	9	NA	NA	9	NA	NA	9	NA
2009-12-18 01:30:00	NA	NA	9	NA	NA	9	NA	NA	9	NA	NA	9	NA	NA	9	NA	NA	9	NA	NA	9	NA	NA	9	NA	NA	9	NA	NA	9	NA	NA	9	NA	NA	9	NA	NA	9	NA	NA	9	NA	NA	9	NA	NA	9	NA
2009-12-18 02:30:00	NA	NA	9	NA	NA	9	NA	NA	9	NA	NA	9	NA	NA	9	NA	NA	9	NA	NA	9	NA	NA	9	NA	NA	9	NA	NA	9	NA	NA	9	NA	NA	9	NA	NA	9	NA	NA	9	NA	NA	9	NA	NA	9	NA
2009-12-18 03:30:00	NA	NA	9	NA	NA	9	NA	NA	9	NA	NA	9	NA	NA	9	NA	NA	9	NA	NA	9	NA	NA	9	NA	NA	9	NA	NA	9	NA	NA	9	NA	NA	9	NA	NA	9	NA	NA	9	NA	NA	9	NA	NA	9	NA
2009-12-18 04:30:00	NA	NA	9	NA	NA	9	NA	NA	9	NA	NA	9	NA	NA	9	NA	NA	9	NA	NA	9	NA	NA	9	NA	NA	9	NA	NA	9	NA	NA	9	NA	NA	9	NA	NA	9	NA	NA	9	NA	NA	9	NA	NA	9	NA
2009-12-18 05:30:00	NA	NA	9	NA	NA	9	NA	NA	9	NA	NA	9	NA	NA	9	NA	NA	9	NA	NA	9	NA	NA	9	NA	NA	9	NA	NA	9	NA	NA	9	NA	NA	9	NA	NA	9	NA	NA	9	NA	NA	9	NA	NA	9	NA
2009-12-18 06:30:00	NA	NA	9	NA	NA	9	NA	NA	9	NA	NA	9	NA	NA	9	NA	NA	9	NA	NA	9	NA	NA	9	NA	NA	9	NA	NA	9	NA	NA	9	NA	NA	9	NA	NA	9	NA	NA	9	NA	NA	9	NA	NA	9	NA
2009-12-18 07:30:00	NA	NA	9	NA	NA	9	NA	NA	9	NA	NA	9	NA	NA	9	NA	NA	9	NA	NA	9	NA	NA	9	NA	NA	9	NA	NA	9	NA	NA	9	NA	NA	9	NA	NA	9	NA	NA	9	NA	NA	9	NA	NA	9	NA
2009-12-18 08:30:00	NA	NA	9	NA	NA	9	NA	NA	9	NA	NA	9	NA	NA	9	NA	NA	9	NA	NA	9	NA	NA	9	NA	NA	9	NA	NA	9	NA	NA	9	NA	NA	9	NA	NA	9	NA	NA	9	NA	NA	9	NA	NA	9	NA
2009-12-18 09:30:00	NA	NA	9	NA	NA	9	NA	NA	9	NA	NA	9	NA	NA	9	NA	NA	9	NA	NA	9	NA	NA	9	NA	NA	9	NA	NA	9	NA	NA	9	NA	NA	9	NA	NA	9	NA	NA	9	NA	NA	9	NA	NA	9	NA
2009-12-18 10:30:00	NA	NA	9	NA	NA	9	NA	NA	9	NA	NA	9	NA	NA	9	NA	NA	9	NA	NA	9	NA	NA	9	NA	NA	9	NA	NA	9	NA	NA	9	NA	NA	9	NA	NA	9	NA	NA	9	NA	NA	9	NA	NA	9	NA
2009-12-18 11:30:00	NA	NA	9	NA	NA	9	NA	NA	3	NA	NA	9	NA	NA	9	NA	NA	3	NA	NA	9	NA	NA	9	NA	NA	3	NA	NA	9	NA	NA	3	NA	NA	9	NA	NA	3	NA	NA	9	NA	NA	3	NA	NA	3	NA
2009-12-18 12:30:00	NA	NA	9	NA	NA	9	912.584	0.318789	0	NA	NA	9	NA	NA	9	2.91482	0.0242364	0	NA	NA	9	NA	NA	9	3.7973	0.00335544	0	NA	NA	9	42.3798	0.0472338	0	NA	NA	9	-0.0163403	0.016739	0	NA	NA	9	0.0329878	0.0107823	0	0.0403634	0.0110588	0	265.388
2009-12-18 13:30:00	NA	NA	9	NA	NA	9	912.236	0.335002	0	NA	NA	9	NA	NA	9	2.902	0.0123638	0	NA	NA	9	NA	NA	9	3.79507	0.00342159	0	NA	NA	9	42.3689	0.0440501	0	NA	NA	9	-0.0284376	0.00852746	0	NA	NA	9	0.00602091	0.0176281	0	0.0338466	0.00909145	0	275.195
2009-12-18 14:30:00	NA	NA	9	NA	NA	9	911.948	0.31897	0	NA	NA	9	NA	NA	9	2.91557	0.0130297	0	NA	NA	9	NA	NA	9	3.79631	0.00385797	0	NA	NA	9	42.3668	0.0470536	0	NA	NA	9	-0.0211571	0.00745818	0	NA	NA	9	-0.00209243	0.00693296	0	0.0223571	0.00747172	0	263.347
2009-12-18 15:30:00	NA	NA	9	NA	NA	9	911.928	0.319623	0	NA	NA	9	NA	NA	9	2.93484	0.0161695	0	NA	NA	9	NA	NA	9	3.80037	0.00370837	0	NA	NA	9	42.3924	0.0456655	0	NA	NA	9	-0.016782	0.00430937	0	NA	NA	9	-0.01832	0.00571607	0	0.0254349	0.00464279	0	223.226
2009-12-18 16:30:00	NA	NA	9	NA	NA	9	912.073	0.372665	0	NA	NA	9	NA	NA	9	2.93536	0.0209604	0	NA	NA	9	NA	NA	9	3.80011	0.00372237	0	NA	NA	9	42.3884	0.0479075	0	NA	NA	9	-0.0265897	0.00767712	0	NA	NA	9	-0.022301	0.0100171	0	0.0351796	0.011225	0	231.944
2009-12-18 17:30:00	NA	NA	9	NA	NA	9	912.487	0.343685	0	NA	NA	9	NA	NA	9	2.96263	0.0247688	0	NA	NA	9	NA	NA	9	3.80157	0.00342337	0	NA	NA	9	42.3708	0.0383533	0	NA	NA	9	-0.125448	0.0532861	0	NA	NA	9	-0.058913	0.0354848	0	0.141203	0.0580317	0	244.79
2009-12-18 18:30:00	NA	NA	9	NA	NA	9	913.064	0.3415	0	NA	NA	9	NA	NA	9	2.94033	0.0255773	0	NA	NA	9	NA	NA	9	3.80094	0.00304267	0	NA	NA	9	42.3917	0.0435259	0	NA	NA	9	-0.244631	0.0439373	0	NA	NA	9	-0.181067	0.0646126	0	0.30811	0.0616597	0	234.547
2009-12-18 19:30:00	NA	NA	9	NA	NA	9	913.388	0.298037	0	NA	NA	9	NA	NA	9	2.92732	0.0144164	0	NA	NA	9	NA	NA	9	3.80232	0.00299867	0	NA	NA	9	42.4257	0.0379395	0	NA	NA	9	-0.233909	0.0401494	0	NA	NA	9	-0.210469	0.0261877	0	0.316049	0.0376947	0	227.758
2009-12-18 20:30:00	NA	NA	9	NA	NA	9	913.549	0.313204	0	NA	NA	9	NA	NA	9	2.95804	0.042313	0	NA	NA	9	NA	NA	9	3.8051	0.00427564	0	NA	NA	9	42.4202	0.0434839	0	NA	NA	9	-0.201942	0.0301928	0	NA	NA	9	-0.158713	0.021526	0	0.25811	0.0269104	0	231.64
2009-12-18 21:30:00	NA	NA	9	NA	NA	9	913.378	0.333877	0	NA	NA	9	NA	NA	9	3.05004	0.0219276	0	NA	NA	9	NA	NA	9	3.81167	0.00329076	0	NA	NA	9	42.382	0.0410161	0	NA	NA	9	-0.158303	0.045561	0	NA	NA	9	-0.0795049	0.0389529	0	0.179098	0.0538295	0	244.313
2009-12-18 22:30:00	NA	NA	9	NA	NA	9	912.851	0.336608	0	NA	NA	9	NA	NA	9	3.12198	0.0191009	0	NA	NA	9	NA	NA	9	3.81535	0.00951765	0	NA	NA	9	42.3343	0.124166	0	NA	NA	9	-0.104268	0.0223713	0	NA	NA	9	-0.0488633	0.0189273	0	0.116211	0.0247574	0	245.186
2009-12-18 23:30:00	NA	NA	9	NA	NA	9	912.213	0.338547	0	NA	NA	9	NA	NA	9	3.16172	0.0129621	0	NA	NA	9	NA	NA	9	3.81995	0.00716779	0	NA	NA	9	42.3401	0.0832818	0	NA	NA	9	-0.0373088	0.0379903	0	NA	NA	9	-0.00375269	0.0244257	0	0.0517536	0.0276905	0	226.27
2009-12-19 00:30:00	NA	NA	9	NA	NA	9	911.518	0.353488	0	NA	NA	9	NA	NA	9	3.15282	0.0166983	0	NA	NA	9	NA	NA	9	3.82078	0.00376803	0	NA	NA	9	42.3625	0.0495413	0	NA	NA	9	-0.0219342	0.0123093	0	NA	NA	9	-0.0122371	0.0225253	0	0.0330669	0.0140031	0	247.938
2009-12-19 01:30:00	NA	NA	9	NA	NA	9	910.927	0.366233	0	NA	NA	9	NA	NA	9	3.10076	0.0213024	0	NA	NA	9	NA	NA	9	3.81759	0.00358389	0	NA	NA	9	42.391	0.0393691	0	NA	NA	9	-0.000287398	0.010828	0	NA	NA	9	0.0595272	0.0216858	0	0.0606927	0.021152	0	184.555
2009-12-19 02:30:00	NA	NA	9	NA	NA	9	910.639	0.306828	0	NA	NA	9	NA	NA	9	2.99574	0.0271575	0	NA	NA	9	NA	NA	9	3.8094	0.00327293	0	NA	NA	9	42.4264	0.0420063	0	NA	NA	9	-0.00286352	0.0135742	0	NA	NA	9	0.0568315	0.0354813	0	0.0595346	0.0337145	0	202.884
2009-12-19 03:30:00	NA	NA	9	NA	NA	9	910.452	0.295895	0	NA	NA	9	NA	NA	9	2.96956	0.0110193	0	NA	NA	9	NA	NA	9	3.80797	0.00330531	0	NA	NA	9	42.443	0.0440286	0	NA	NA	9	-0.0128083	0.021105	0	NA	NA	9	0.00342935	0.0255118	0	0.0306616	0.018208	0	208.283
2009-12-19 04:30:00	NA	NA	9	NA	NA	9	910.434	0.339751	0	NA	NA	9	NA	NA	9	2.96939	0.0129873	0	NA	NA	9	NA	NA	9	3.80857	0.00343792	0	NA	NA	9	42.4506	0.0457836	0	NA	NA	9	-0.0338127	0.0173479	0	NA	NA	9	-0.00171797	0.0202993	0	0.0395936	0.0170696	0	263.058
2009-12-19 05:30:00	NA	NA	9	NA	NA	9	910.802	0.332069	0	NA	NA	9	NA	NA	9	2.96167	0.0145846	0	NA	NA	9	NA	NA	9	3.80775	0.00325209	0	NA	NA	9	42.4503	0.0412095	0	NA	NA	9	-0.044751	0.0242878	0	NA	NA	9	0.0181262	0.0206833	0	0.0533378	0.0224433	0	285.514
2009-12-19 06:30:00	NA	NA	9	NA	NA	9	911.334	0.365272	0	NA	NA	9	NA	NA	9	2.96683	0.0125324	0	NA	NA	9	NA	NA	9	3.80911	0.00297147	0	NA	NA	9	42.4602	0.0400471	0	NA	NA	9	-0.0157593	0.018134	0	NA	NA	9	-0.0108394	0.0175519	0	0.0281457	0.0145032	0	221.628
2009-12-19 07:30:00	NA	NA	9	NA	NA	9	911.939	0.366003	0	NA	NA	9	NA	NA	9	2.96439	0.0177691	0	NA	NA	9	NA	NA	9	3.80809	0.00351466	0	NA	NA	9	42.4503	0.0411074	0	NA	NA	9	-0.103629	0.0752063	0	NA	NA	9	-0.0856138	0.0461934	0	0.136618	0.0848151	0	224.455
2009-12-19 08:30:00	NA	NA	9	NA	NA	9	912.509	0.336056	0	NA	NA	9	NA	NA	9	2.98711	0.0150149	0	NA	NA	9	NA	NA	9	3.80942	0.00283851	0	NA	NA	9	42.4368	0.0407783	0	NA	NA	9	-0.172229	0.0361349	0	NA	NA	9	-0.130176	0.025503	0	0.217157	0.0375184	0	232.676
2009-12-19 09:30:00	NA	NA	9	NA	NA	9	912.902	0.334462	0	NA	NA	9	NA	NA	9	2.99019	0.0388991	0	NA	NA	9	NA	NA	9	3.81001	0.00351553	0	NA	NA	9	42.4399	0.0468583	0	NA	NA	9	-0.175366	0.0329149	0	NA	NA	9	-0.134746	0.0268801	0	0.223091	0.030754	0	232.239
2009-12-19 10:30:00	NA	NA	9	NA	NA	9	913.003	0.36414	0	NA	NA	9	NA	NA	9	2.99436	0.0325757	0	NA	NA	9	NA	NA	9	3.81108	0.00376184	0	NA	NA	9	42.4477	0.0465039	0	NA	NA	9	-0.121852	0.0344101	0	NA	NA	9	-0.0463142	0.0591825	0	0.140891	0.0427526	0	254.249
2009-12-19 11:30:00	NA	NA	9	NA	NA	9	912.534	0.30324	0	NA	NA	9	NA	NA	9	3.0621	0.0220447	0	NA	NA	9	NA	NA	9	3.81542	0.00351534	0	NA	NA	9	42.4135	0.0489638	0	NA	NA	9	-0.0578848	0.0301866	0	NA	NA	9	0.0312367	0.0179468	0	0.0673519	0.0319893	0	299.779
2009-12-19 12:30:00	NA	NA	9	NA	NA	9	912.264	0.306672	0	NA	NA	9	NA	NA	9	3.09806	0.01418	0	NA	NA	9	NA	NA	9	3.81802	0.00335225	0	NA	NA	9	42.399	0.0452932	0	NA	NA	9	-0.018966	0.0188009	0	NA	NA	9	0.0316648	0.0184355	0	0.0422932	0.0163325	0	281.58
2009-12-19 13:30:00	NA	NA	9	NA	NA	9	911.965	0.305624	0	NA	NA	9	NA	NA	9	3.06342	0.0301517	0	NA	NA	9	NA	NA	9	3.81548	0.00361774	0	NA	NA	9	42.4128	0.0480532	0	NA	NA	9	0.0522364	0.0210015	0	NA	NA	9	0.0481065	0.0140914	0	0.0721496	0.021837	0	45.9115
2009-12-19 14:30:00	NA	NA	9	NA	NA	9	911.868	0.31435	0	NA	NA	9	NA	NA	9	3.00098	0.035713	0	NA	NA	9	NA	NA	9	3.81172	0.00394859	0	NA	NA	9	42.4477	0.0409614	0	NA	NA	9	0.0680167	0.0146419	0	NA	NA	9	0.0573504	0.0133617	0	0.0901415	0.0135148	0	49.6673
2009-12-19 15:30:00	NA	NA	9	NA	NA	9	911.853	0.33537	0	NA	NA	9	NA	NA	9	2.92776	0.0114568	0	NA	NA	9	NA	NA	9	3.80801	0.00344113	0	NA	NA	9	42.4974	0.0444071	0	NA	NA	9	0.0354188	0.0191659	0	NA	NA	9	0.0273621	0.0200022	0	0.0466495	0.0243786	0	68.5067
2009-12-19 16:30:00	NA	NA	9	NA	NA	9	911.745	0.307852	0	NA	NA	9	NA	NA	9	2.95001	0.0158386	0	NA	NA	9	NA	NA	9	3.80962	0.00330632	0	NA	NA	9	42.4884	0.0429149	0	NA	NA	9	-0.00619952	0.0136103	0	NA	NA	9	0.0104751	0.00617237	0	0.0174272	0.0082285	0	235.048
2009-12-19 17:30:00	NA	NA	9	NA	NA	9	912.065	0.333494	0	NA	NA	9	NA	NA	9	2.97625	0.012359	0	NA	NA	9	NA	NA	9	3.81084	0.00314791	0	NA	NA	9	42.4691	0.0423535	0	NA	NA	9	-0.024969	0.0112605	0	NA	NA	9	0.00910347	0.0109937	0	0.0290645	0.0104482	0	281.794
2009-12-19 18:30:00	NA	NA	9	NA	NA	9	912.422	0.351578	0	NA	NA	9	NA	NA	9	2.98281	0.0185693	0	NA	NA	9	NA	NA	9	3.81243	0.00360851	0	NA	NA	9	42.4801	0.0454801	0	NA	NA	9	-0.012824	0.00987094	0	NA	NA	9	0.0391758	0.0171175	0	0.0438749	0.0128259	0	302.671
2009-12-19 19:30:00	NA	NA	9	NA	NA	9	912.818	0.332438	0	NA	NA	9	NA	NA	9	2.98313	0.014517	0	NA	NA	9	NA	NA	9	3.81101	0.00343955	0	NA	NA	9	42.4617	0.0445323	0	NA	NA	9	-0.0486315	0.0154813	0	NA	NA	9	0.0180717	0.0197415	0	0.0542569	0.0194177	0	287.457
2009-12-19 20:30:00	NA	NA	9	NA	NA	9	913.185	0.321836	0	NA	NA	9	NA	NA	9	2.95438	0.0231881	0	NA	NA	9	NA	NA	9	3.80732	0.00369796	0	NA	NA	9	42.453	0.0447425	0	NA	NA	9	-0.0794579	0.0331399	0	NA	NA	9	0.0304992	0.0134733	0	0.086069	0.0334002	0	292.278
2009-12-19 21:30:00	NA	NA	9	NA	NA	9	913.21	0.309062	0	NA	NA	9	NA	NA	9	2.99874	0.0329465	0	NA	NA	9	NA	NA	9	3.81252	0.00366692	0	NA	NA	9	42.4598	0.0444522	0	NA	NA	9	-0.137046	0.042104	0	NA	NA	9	0.067637	0.0292414	0	0.154472	0.0460686	0	296.2
2009-12-19 22:30:00	NA	NA	9	NA	NA	9	913.039	0.316372	0	NA	NA	9	NA	NA	9	2.98724	0.045791	0	NA	NA	9	NA	NA	9	3.81176	0.00432091	0	NA	NA	9	42.4655	0.0423348	0	NA	NA	9	-0.11733	0.0367703	0	NA	NA	9	0.0485727	0.025943	0	0.128526	0.0403938	0	291.455
2009-12-19 23:30:00	NA	NA	9	NA	NA	9	912.399	0.352548	0	NA	NA	9	NA	NA	9	3.11146	0.0248962	0	NA	NA	9	NA	NA	9	3.82085	0.0035655	0	NA	NA	9	42.4168	0.0439287	0	NA	NA	9	-0.0705551	0.040791	0	NA	NA	9	0.0400671	0.0178944	0	0.0855684	0.0352867	0	303.187
2009-12-20 00:30:00	NA	NA	9	NA	NA	9	911.803	0.390168	0	NA	NA	9	NA	NA	9	3.13447	0.0186761	0	NA	NA	9	NA	NA	9	3.82272	0.0039791	0	NA	NA	9	42.4103	0.0476308	0	NA	NA	9	-0.0232132	0.0128406	0	NA	NA	9	0.0360286	0.0187409	0	0.0442317	0.0199124	0	303.833
2009-12-20 01:30:00	NA	NA	9	NA	NA	9	911.076	0.396239	0	NA	NA	9	NA	NA	9	3.12438	0.021252	0	NA	NA	9	NA	NA	9	3.82383	0.00421029	0	NA	NA	9	42.4378	0.047167	0	NA	NA	9	-0.0124767	0.0153817	0	NA	NA	9	0.0202948	0.0123134	0	0.0283311	0.0123684	0	252.204
2009-12-20 02:30:00	NA	NA	9	NA	NA	9	910.639	0.322605	0	NA	NA	9	NA	NA	9	3.10734	0.029324	0	NA	NA	9	NA	NA	9	3.82297	0.00414836	0	NA	NA	9	42.4496	0.0451956	0	NA	NA	9	0.0441016	0.0328116	0	NA	NA	9	0.0331887	0.0134403	0	0.0575979	0.0314009	0	60.876
2009-12-20 03:30:00	NA	NA	9	NA	NA	9	910.418	0.317084	0	NA	NA	9	NA	NA	9	3.01287	0.0248894	0	NA	NA	9	NA	NA	9	3.81512	0.00358995	0	NA	NA	9	42.4755	0.0493181	0	NA	NA	9	0.064637	0.0291739	0	NA	NA	9	0.0166188	0.0239849	0	0.0715069	0.0276933	0	80.6598
2009-12-20 04:30:00	NA	NA	9	NA	NA	9	910.409	0.297798	0	NA	NA	9	NA	NA	9	2.96068	0.0156756	0	NA	NA	9	NA	NA	9	3.81201	0.00322367	0	NA	NA	9	42.5051	0.0431969	0	NA	NA	9	0.00648898	0.0258967	0	NA	NA	9	0.0164224	0.0183101	0	0.0304253	0.0197905	0	166.178
2009-12-20 05:30:00	NA	NA	9	NA	NA	9	910.46	0.313903	0	NA	NA	9	NA	NA	9	2.98296	0.013246	0	NA	NA	9	NA	NA	9	3.81451	0.00352049	0	NA	NA	9	42.5071	0.0455134	0	NA	NA	9	-0.00509436	0.00937805	0	NA	NA	9	0.0231547	0.0134089	0	0.0257632	0.0128858	0	268.728
2009-12-20 06:30:00	NA	NA	9	NA	NA	9	911.006	0.356442	0	NA	NA	9	NA	NA	9	2.94231	0.0165473	0	NA	NA	9	NA	NA	9	3.80952	0.0035009	0	NA	NA	9	42.4977	0.0449828	0	NA	NA	9	-0.0432569	0.017131	0	NA	NA	9	0.0255201	0.0105961	0	0.0515766	0.0163694	0	301.953
2009-12-20 07:30:00	NA	NA	9	NA	NA	9	911.603	0.389715	0	NA	NA	9	NA	NA	9	2.90137	0.0215919	0	NA	NA	9	NA	NA	9	3.80637	0.00308471	0	NA	NA	9	42.5117	0.0388721	0	NA	NA	9	-0.0699621	0.0217637	0	NA	NA	9	0.0344976	0.0161051	0	0.0789869	0.0240583	0	296.209
2009-12-20 08:30:00	NA	NA	9	NA	NA	9	912.193	0.356001	0	NA	NA	9	NA	NA	9	2.91196	0.0110177	0	NA	NA	9	NA	NA	9	3.80759	0.00273126	0	NA	NA	9	42.5126	0.0369445	0	NA	NA	9	-0.0787295	0.0227558	0	NA	NA	9	0.0330242	0.0185022	0	0.0869618	0.0242194	0	292.71
2009-12-20 09:30:00	NA	NA	9	NA	NA	9	912.58	0.325187	0	NA	NA	9	NA	NA	9	2.934	0.0290598	0	NA	NA	9	NA	NA	9	3.81004	0.00375472	0	NA	NA	9	42.5141	0.0436802	0	NA	NA	9	-0.138555	0.0379032	0	NA	NA	9	0.0325934	0.0236019	0	0.143923	0.0392365	0	282.882
2009-12-20 10:30:00	NA	NA	9	NA	NA	9	912.818	0.320693	0	NA	NA	9	NA	NA	9	2.98679	0.0273291	0	NA	NA	9	NA	NA	9	3.81324	0.00343662	0	NA	NA	9	42.4847	0.0416336	0	NA	NA	9	-0.14177	0.0411445	0	NA	NA	9	0.0460397	0.0275551	0	0.15103	0.0431308	0	287.761
2009-12-20 11:30:00	NA	NA	9	NA	NA	9	912.76	0.300274	0	NA	NA	9	NA	NA	9	3.00139	0.0237052	0	NA	NA	9	NA	NA	9	3.81592	0.00309968	0	NA	NA	9	42.4991	0.0422239	0	NA	NA	9	-0.124667	0.0409658	0	NA	NA	9	0.052472	0.0304342	0	0.137522	0.0445746	0	291.777
2009-12-20 12:30:00	NA	NA	9	NA	NA	9	912.028	0.489981	0	NA	NA	9	NA	NA	9	3.1193	0.0539703	0	NA	NA	9	NA	NA	9	3.82306	0.0048767	0	NA	NA	9	42.4343	0.0569092	0	NA	NA	9	-0.0527693	0.0487232	0	NA	NA	9	0.039682	0.0362608	0	0.0764881	0.04687	0	266.583
2009-12-20 13:30:00	NA	NA	9	NA	NA	9	911.35	0.326264	0	NA	NA	9	NA	NA	9	3.20107	0.0329876	0	NA	NA	9	NA	NA	9	3.82882	0.00376112	0	NA	NA	9	42.3996	0.0439728	0	NA	NA	9	-0.0304964	0.0271343	0	NA	NA	9	-6.5552e-05	0.0262428	0	0.0428523	0.0227633	0	254.632
2009-12-20 14:30:00	NA	NA	9	NA	NA	9	910.988	0.314369	0	NA	NA	9	NA	NA	9	3.1708	0.0236433	0	NA	NA	9	NA	NA	9	3.8265	0.00370262	0	NA	NA	9	42.4104	0.047321	0	NA	NA	9	0.0325697	0.0123693	0	NA	NA	9	0.00323428	0.019047	0	0.0377504	0.012718	0	87.6005
2009-12-20 15:30:00	NA	NA	9	NA	NA	9	910.836	0.30389	0	NA	NA	9	NA	NA	9	3.13981	0.0141369	0	NA	NA	9	NA	NA	9	3.82545	0.00331863	0	NA	NA	9	42.438	0.0456629	0	NA	NA	9	0.0259203	0.0109489	0	NA	NA	9	0.00419371	0.00804829	0	0.0275323	0.0107718	0	84.5572
2009-12-20 16:30:00	NA	NA	9	NA	NA	9	910.897	0.312871	0	NA	NA	9	NA	NA	9	3.08927	0.0427178	0	NA	NA	9	NA	NA	9	3.82135	0.00483528	0	NA	NA	9	42.4529	0.0429102	0	NA	NA	9	0.068971	0.0288742	0	NA	NA	9	-0.0124302	0.0106743	0	0.0708183	0.0290497	0	99.5691
2009-12-20 17:30:00	NA	NA	9	NA	NA	9	911.117	0.2806	0	NA	NA	9	NA	NA	9	3.03704	0.0198532	0	NA	NA	9	NA	NA	9	3.8176	0.00340027	0	NA	NA	9	42.4744	0.0428783	0	NA	NA	9	0.0526432	0.0295018	0	NA	NA	9	0.00117436	0.021395	0	0.0569504	0.0292777	0	83.0779
2009-12-20 18:30:00	NA	NA	9	NA	NA	9	911.437	0.285524	0	NA	NA	9	NA	NA	9	3.01573	0.0201694	0	NA	NA	9	NA	NA	9	3.81699	0.00352959	0	NA	NA	9	42.4945	0.0446354	0	NA	NA	9	0.0317952	0.0269949	0	NA	NA	9	-0.012076	0.0200047	0	0.0421331	0.022586	0	134.77
2009-12-20 19:30:00	NA	NA	9	NA	NA	9	911.821	0.319519	0	NA	NA	9	NA	NA	9	3.0135	0.0152349	0	NA	NA	9	NA	NA	9	3.81733	0.00318068	0	NA	NA	9	42.5014	0.0441057	0	NA	NA	9	0.00976073	0.0131859	0	NA	NA	9	-0.0310724	0.0142149	0	0.0368307	0.00894625	0	158.876
2009-12-20 20:30:00	NA	NA	9	NA	NA	9	912.087	0.350628	0	NA	NA	9	NA	NA	9	3.02992	0.0112772	0	NA	NA	9	NA	NA	9	3.81893	0.00331595	0	NA	NA	9	42.4997	0.040427	0	NA	NA	9	0.00265691	0.0255604	0	NA	NA	9	0.00115333	0.00517055	0	0.0224813	0.0135194	0	190.05
2009-12-20 21:30:00	NA	NA	9	NA	NA	9	912.317	0.30463	0	NA	NA	9	NA	NA	9	3.04453	0.0260968	0	NA	NA	9	NA	NA	9	3.81915	0.00355034	0	NA	NA	9	42.4832	0.040335	0	NA	NA	9	-0.103165	0.0421142	0	NA	NA	9	0.0253687	0.0269536	0	0.108366	0.0452024	0	280.438
2009-12-20 22:30:00	NA	NA	9	NA	NA	9	912.199	0.32156	0	NA	NA	9	NA	NA	9	3.13956	0.024934	0	NA	NA	9	NA	NA	9	3.82629	0.00326605	0	NA	NA	9	42.4479	0.0420757	0	NA	NA	9	-0.134939	0.0330178	0	NA	NA	9	0.0574899	0.0217364	0	0.147963	0.0343981	0	292.994
2009-12-20 23:30:00	NA	NA	9	NA	NA	9	911.732	0.442148	0	NA	NA	9	NA	NA	9	3.24511	0.0353036	0	NA	NA	9	NA	NA	9	3.83325	0.00344116	0	NA	NA	9	42.3969	0.0428303	0	NA	NA	9	-0.116735	0.0384446	0	NA	NA	9	0.043682	0.0332119	0	0.128559	0.0398538	0	289.204
2009-12-21 00:30:00	NA	NA	9	NA	NA	9	911.175	0.380435	0	NA	NA	9	NA	NA	9	3.3224	0.0498972	0	NA	NA	9	NA	NA	9	3.83747	0.00466266	0	NA	NA	9	42.349	0.0445717	0	NA	NA	9	-0.0791616	0.032717	0	NA	NA	9	0.0194031	0.0242621	0	0.0851608	0.0323942	0	282.318
2009-12-21 01:30:00	NA	NA	9	NA	NA	9	910.542	0.319489	0	NA	NA	9	NA	NA	9	3.34565	0.0931603	0	NA	NA	9	NA	NA	9	3.83779	0.00687765	0	NA	NA	9	42.3232	0.0617225	0	NA	NA	9	-0.00805987	0.0556619	0	NA	NA	9	0.0236545	0.0188334	0	0.0563275	0.0300539	0	197.662
2009-12-21 02:30:00	NA	NA	9	NA	NA	9	910.488	0.32332	0	NA	NA	9	NA	NA	9	3.06324	0.0711847	0	NA	NA	9	NA	NA	9	3.8191	0.00580715	0	NA	NA	9	42.4592	0.0546701	0	NA	NA	9	0.0836754	0.0331135	0	NA	NA	9	0.00273291	0.018391	0	0.086005	0.0323528	0	87.544
2009-12-21 03:30:00	NA	NA	9	NA	NA	9	910.246	0.344683	0	NA	NA	9	NA	NA	9	2.97898	0.0148912	0	NA	NA	9	NA	NA	9	3.81394	0.00308951	0	NA	NA	9	42.5054	0.0423133	0	NA	NA	9	0.109759	0.0297789	0	NA	NA	9	-0.0393826	0.0188665	0	0.117794	0.0310642	0	109.729
2009-12-21 04:30:00	NA	NA	9	NA	NA	9	909.977	0.305342	0	NA	NA	9	NA	NA	9	2.98126	0.0163315	0	NA	NA	9	NA	NA	9	3.81478	0.00369089	0	NA	NA	9	42.513	0.0439899	0	NA	NA	9	0.0828455	0.01967	0	NA	NA	9	-0.00106353	0.0102022	0	0.0835129	0.0195202	0	90.1175
2009-12-21 05:30:00	NA	NA	9	NA	NA	9	910.146	0.316273	0	NA	NA	9	NA	NA	9	2.90027	0.0186773	0	NA	NA	9	NA	NA	9	3.80779	0.00316783	0	NA	NA	9	42.5318	0.0401573	0	NA	NA	9	0.115827	0.0233393	0	NA	NA	9	-0.0124465	0.0158233	0	0.117815	0.022031	0	96.861
2009-12-21 06:30:00	NA	NA	9	NA	NA	9	910.32	0.327736	0	NA	NA	9	NA	NA	9	2.92051	0.0112164	0	NA	NA	9	NA	NA	9	3.81101	0.0031947	0	NA	NA	9	42.5454	0.0405786	0	NA	NA	9	0.0439173	0.0156535	0	NA	NA	9	-0.00517013	0.0093338	0	0.0448369	0.0166503	0	94.4587
2009-12-21 07:30:00	NA	NA	9	NA	NA	9	910.802	0.338778	0	NA	NA	9	NA	NA	9	2.88676	0.0146179	0	NA	NA	9	NA	NA	9	3.80768	0.0030446	0	NA	NA	9	42.5478	0.0376329	0	NA	NA	9	0.0304426	0.00876722	0	NA	NA	9	0.0111885	0.0139943	0	0.0343693	0.0119715	0	75.0507
2009-12-21 08:30:00	NA	NA	9	NA	NA	9	911.439	0.412628	0	NA	NA	9	NA	NA	9	2.87054	0.023728	0	NA	NA	9	NA	NA	9	3.80718	0.00413029	0	NA	NA	9	42.5625	0.0501493	0	NA	NA	9	-0.0122953	0.050432	0	NA	NA	9	-0.0015988	0.0177789	0	0.0458097	0.0302259	0	161.544
2009-12-21 09:30:00	NA	NA	9	NA	NA	9	912.327	0.339208	0	NA	NA	9	NA	NA	9	2.82837	0.0179049	0	NA	NA	9	NA	NA	9	3.80322	0.00276389	0	NA	NA	9	42.5678	0.0382471	0	NA	NA	9	-0.136946	0.050012	0	NA	NA	9	0.0104256	0.0259222	0	0.139788	0.0499484	0	273.66
2009-12-21 10:30:00	NA	NA	9	NA	NA	9	912.723	0.308424	0	NA	NA	9	NA	NA	9	2.80789	0.0202283	0	NA	NA	9	NA	NA	9	3.80216	0.0031804	0	NA	NA	9	42.5812	0.0373374	0	NA	NA	9	-0.163396	0.0434343	0	NA	NA	9	0.0176514	0.0222084	0	0.165909	0.043168	0	275.713
2009-12-21 11:30:00	NA	NA	9	NA	NA	9	912.866	0.327329	0	NA	NA	9	NA	NA	9	2.82771	0.0256221	0	NA	NA	9	NA	NA	9	3.80416	0.00343394	0	NA	NA	9	42.58	0.0432468	0	NA	NA	9	-0.10978	0.0425422	0	NA	NA	9	-0.000991846	0.0254047	0	0.112967	0.0417832	0	267.032
2009-12-21 12:30:00	NA	NA	9	NA	NA	9	912.736	0.314632	0	NA	NA	9	NA	NA	9	2.84721	0.0180266	0	NA	NA	9	NA	NA	9	3.80552	0.00312739	0	NA	NA	9	42.5715	0.038555	0	NA	NA	9	-0.123356	0.0362328	0	NA	NA	9	0.0182891	0.0269361	0	0.127453	0.0366743	0	277.698
2009-12-21 13:30:00	NA	NA	9	NA	NA	9	912.457	0.330859	0	NA	NA	9	NA	NA	9	2.85477	0.0377206	0	NA	NA	9	NA	NA	9	3.80694	0.00396804	0	NA	NA	9	42.5795	0.0406606	0	NA	NA	9	-0.0896626	0.0308423	0	NA	NA	9	-0.0293221	0.027378	0	0.0977016	0.0324657	0	251.569
2009-12-21 14:30:00	NA	NA	9	NA	NA	9	912.128	0.343041	0	NA	NA	9	NA	NA	9	2.87742	0.0202436	0	NA	NA	9	NA	NA	9	3.80875	0.00334455	0	NA	NA	9	42.5727	0.0412491	0	NA	NA	9	-0.0689646	0.0325455	0	NA	NA	9	-0.0589755	0.0355028	0	0.0929995	0.0436434	0	230.946
2009-12-21 15:30:00	NA	NA	9	NA	NA	9	911.675	0.327034	0	NA	NA	9	NA	NA	9	2.90233	0.0232819	0	NA	NA	9	NA	NA	9	3.81158	0.00389003	0	NA	NA	9	42.5756	0.04259	0	NA	NA	9	-0.00804663	0.00720396	0	NA	NA	9	-0.0247397	0.0124157	0	0.0277442	0.0106329	0	203.307
2009-12-21 16:30:00	NA	NA	9	NA	NA	9	911.39	0.293971	0	NA	NA	9	NA	NA	9	2.97337	0.0171511	0	NA	NA	9	NA	NA	9	3.8173	0.00310918	0	NA	NA	9	42.554	0.0401874	0	NA	NA	9	0.011446	0.00782517	0	NA	NA	9	0.000455562	0.00772059	0	0.0143642	0.00675923	0	104.056
2009-12-21 17:30:00	NA	NA	9	NA	NA	9	911.503	0.323609	0	NA	NA	9	NA	NA	9	2.9124	0.0322428	0	NA	NA	9	NA	NA	9	3.81194	0.0037767	0	NA	NA	9	42.5671	0.038661	0	NA	NA	9	0.0806729	0.0335735	0	NA	NA	9	-0.00995369	0.0144513	0	0.0823067	0.0341866	0	96.5944
2009-12-21 18:30:00	NA	NA	9	NA	NA	9	911.695	0.300548	0	NA	NA	9	NA	NA	9	2.88364	0.0127329	0	NA	NA	9	NA	NA	9	3.80944	0.00304966	0	NA	NA	9	42.5734	0.0398557	0	NA	NA	9	0.0682212	0.0352376	0	NA	NA	9	-0.00167693	0.0321727	0	0.0751673	0.0358195	0	85.2532
2009-12-21 19:30:00	NA	NA	9	NA	NA	9	911.923	0.304247	0	NA	NA	9	NA	NA	9	2.86687	0.0130873	0	NA	NA	9	NA	NA	9	3.80903	0.00318064	0	NA	NA	9	42.5902	0.0406334	0	NA	NA	9	0.0500872	0.0185027	0	NA	NA	9	-0.000844146	0.0116742	0	0.0515669	0.0181343	0	92.1611
2009-12-21 20:30:00	NA	NA	9	NA	NA	9	912.326	0.31632	0	NA	NA	9	NA	NA	9	2.86164	0.0110568	0	NA	NA	9	NA	NA	9	3.80902	0.00301495	0	NA	NA	9	42.5968	0.041834	0	NA	NA	9	0.0208253	0.0167067	0	NA	NA	9	-0.0176615	0.00965751	0	0.0319705	0.00978457	0	135.797
2009-12-21 21:30:00	NA	NA	9	NA	NA	9	912.516	0.337914	0	NA	NA	9	NA	NA	9	2.86538	0.0112415	0	NA	NA	9	NA	NA	9	3.81046	0.00341566	0	NA	NA	9	42.6098	0.0442918	0	NA	NA	9	0.000137996	0.0110992	0	NA	NA	9	-0.017161	0.00945189	0	0.0203606	0.00961394	0	170.731
2009-12-21 22:30:00	NA	NA	9	NA	NA	9	912.818	0.314727	0	NA	NA	9	NA	NA	9	2.84718	0.0163483	0	NA	NA	9	NA	NA	9	3.74588	0.036128	0	NA	NA	9	41.8243	0.441447	0	NA	NA	9	-0.0802249	0.0386511	0	NA	NA	9	-0.016947	0.0298251	0	0.086698	0.039871	0	256.634
2009-12-21 23:30:00	NA	NA	9	NA	NA	9	912.754	0.303651	0	NA	NA	9	NA	NA	9	2.84563	0.0135045	0	NA	NA	9	NA	NA	9	3.74354	0.0397261	0	NA	NA	9	41.7972	0.492007	0	NA	NA	9	-0.125937	0.0336437	0	NA	NA	9	-0.0126172	0.0292779	0	0.129688	0.034483	0	264.218
2009-12-22 00:30:00	NA	NA	9	NA	NA	9	912.403	0.328731	0	NA	NA	9	NA	NA	9	2.90353	0.0175853	0	NA	NA	9	NA	NA	9	3.81369	0.00295235	0	NA	NA	9	42.6	0.0381267	0	NA	NA	9	-0.128604	0.0303281	0	NA	NA	9	0.005622	0.0173636	0	0.129951	0.0300749	0	271.706
2009-12-22 01:30:00	NA	NA	9	NA	NA	9	911.84	0.352261	0	NA	NA	9	NA	NA	9	2.94234	0.0127195	0	NA	NA	9	NA	NA	9	3.81718	0.00315089	0	NA	NA	9	42.5931	0.0401076	0	NA	NA	9	-0.0733831	0.0338022	0	NA	NA	9	0.000197337	0.0161643	0	0.075287	0.033477	0	267.562
2009-12-22 02:30:00	NA	NA	9	NA	NA	9	911.315	0.350961	0	NA	NA	9	NA	NA	9	2.95614	0.0115541	0	NA	NA	9	NA	NA	9	3.81806	0.00315479	0	NA	NA	9	42.5862	0.0401528	0	NA	NA	9	-0.0375654	0.0179848	0	NA	NA	9	-0.0272256	0.0192237	0	0.0488654	0.0213877	0	237.222
2009-12-22 03:30:00	NA	NA	9	NA	NA	9	910.684	0.338368	0	NA	NA	9	NA	NA	9	2.9622	0.0131922	0	NA	NA	9	NA	NA	9	3.81636	0.0102294	0	NA	NA	9	42.5574	0.130019	0	NA	NA	9	0.0289615	0.0159311	0	NA	NA	9	-0.00786119	0.0200674	0	0.038251	0.00967558	0	110.86
2009-12-22 04:30:00	NA	NA	9	NA	NA	9	910.544	0.329601	0	NA	NA	9	NA	NA	9	2.90206	0.0197876	0	NA	NA	9	NA	NA	9	3.8146	0.0033832	0	NA	NA	9	42.6146	0.0405399	0	NA	NA	9	0.0562746	0.016994	0	NA	NA	9	0.0125297	0.0206322	0	0.0612981	0.0167511	0	76.1863
2009-12-22 05:30:00	NA	NA	9	NA	NA	9	910.547	0.332662	0	NA	NA	9	NA	NA	9	2.858	0.0141618	0	NA	NA	9	NA	NA	9	3.81044	0.00337649	0	NA	NA	9	42.6205	0.0415077	0	NA	NA	9	0.0493665	0.0205097	0	NA	NA	9	-0.0246358	0.0130613	0	0.0569258	0.0198635	0	118.534
2009-12-22 06:30:00	NA	NA	9	NA	NA	9	910.605	0.343781	0	NA	NA	9	NA	NA	9	2.85696	0.0116869	0	NA	NA	9	NA	NA	9	3.81023	0.00302145	0	NA	NA	9	42.6192	0.0400469	0	NA	NA	9	0.030331	0.0239023	0	NA	NA	9	-0.0317335	0.0203081	0	0.049792	0.0207648	0	134.683
2009-12-22 07:30:00	NA	NA	9	NA	NA	9	911.004	0.345017	0	NA	NA	9	NA	NA	9	2.85927	0.0138408	0	NA	NA	9	NA	NA	9	3.81132	0.00313859	0	NA	NA	9	42.6296	0.0422219	0	NA	NA	9	0.0144481	0.0236248	0	NA	NA	9	-0.0354346	0.016565	0	0.0437871	0.0194763	0	157.567
2009-12-22 08:30:00	NA	NA	9	NA	NA	9	911.523	0.375671	0	NA	NA	9	NA	NA	9	2.85817	0.0124344	0	NA	NA	9	NA	NA	9	3.81191	0.00310619	0	NA	NA	9	42.6381	0.0423409	0	NA	NA	9	-0.0283923	0.0246829	0	NA	NA	9	-0.0567733	0.0128127	0	0.0660951	0.0208327	0	202.515
2009-12-22 09:30:00	NA	NA	9	NA	NA	9	912.135	0.366459	0	NA	NA	9	NA	NA	9	2.87573	0.0230719	0	NA	NA	9	NA	NA	9	3.81227	0.00386338	0	NA	NA	9	42.619	0.0442657	0	NA	NA	9	-0.0561492	0.0426369	0	NA	NA	9	-0.0148908	0.0619122	0	0.0877779	0.0363059	0	245.026
2009-12-22 10:30:00	NA	NA	9	NA	NA	9	912.135	0.311577	0	NA	NA	9	NA	NA	9	2.87069	0.0216757	0	NA	NA	9	NA	NA	9	3.81076	0.00333332	0	NA	NA	9	42.6067	0.0455677	0	NA	NA	9	-0.0635042	0.0249254	0	NA	NA	9	0.0375208	0.0144708	0	0.0749085	0.0256885	0	301.949
2009-12-22 11:30:00	NA	NA	9	NA	NA	9	912.345	0.299604	0	NA	NA	9	NA	NA	9	2.9085	0.0166404	0	NA	NA	9	NA	NA	9	3.8119	0.00340003	0	NA	NA	9	42.5712	0.0461389	0	NA	NA	9	-0.0564727	0.0242209	0	NA	NA	9	0.0356559	0.0170056	0	0.0684501	0.025511	0	302.802
2009-12-22 12:30:00	NA	NA	9	NA	NA	9	912.427	0.310844	0	NA	NA	9	NA	NA	9	2.90451	0.0209392	0	NA	NA	9	NA	NA	9	3.81185	0.00305474	0	NA	NA	9	42.5757	0.0348037	0	NA	NA	9	-0.0691402	0.0257098	0	NA	NA	9	0.0307872	0.0178476	0	0.0773004	0.0270603	0	294.222
2009-12-22 13:30:00	NA	NA	9	NA	NA	9	912.217	0.309145	0	NA	NA	9	NA	NA	9	2.94659	0.0100542	0	NA	NA	9	NA	NA	9	3.81406	0.00274051	0	NA	NA	9	42.5481	0.0361679	0	NA	NA	9	-0.0681507	0.0291895	0	NA	NA	9	0.0343675	0.0174402	0	0.0778515	0.0303453	0	297.415
2009-12-22 14:30:00	NA	NA	9	NA	NA	9	911.958	0.326234	0	NA	NA	9	NA	NA	9	2.94622	0.0128728	0	NA	NA	9	NA	NA	9	3.81408	0.00301842	0	NA	NA	9	42.5491	0.0386754	0	NA	NA	9	-0.0510261	0.0201246	0	NA	NA	9	0.0450183	0.0202301	0	0.0697932	0.0239445	0	310.249
2009-12-22 15:30:00	NA	NA	9	NA	NA	9	911.616	0.330858	0	NA	NA	9	NA	NA	9	2.98392	0.0179696	0	NA	NA	9	NA	NA	9	3.81697	0.00301431	0	NA	NA	9	42.5359	0.040592	0	NA	NA	9	-0.0758304	0.0377038	0	NA	NA	9	0.0247798	0.020964	0	0.0831334	0.0362475	0	291.349
2009-12-22 16:30:00	NA	NA	9	NA	NA	9	911.188	0.315361	0	NA	NA	9	NA	NA	9	3.00202	0.0146476	0	NA	NA	9	NA	NA	9	3.81869	0.00316901	0	NA	NA	9	42.5339	0.0417101	0	NA	NA	9	-0.0233124	0.0305921	0	NA	NA	9	0.0237182	0.0136161	0	0.0430885	0.0192421	0	281.691
2009-12-22 17:30:00	NA	NA	9	NA	NA	9	911.145	0.30864	0	NA	NA	9	NA	NA	9	2.96203	0.0140732	0	NA	NA	9	NA	NA	9	3.818	0.0037189	0	NA	NA	9	42.5778	0.0469676	0	NA	NA	9	0.0159606	0.0176388	0	NA	NA	9	0.0392065	0.0102835	0	0.0449018	0.0138737	0	84.0539
2009-12-22 18:30:00	NA	NA	9	NA	NA	9	911.292	0.32454	0	NA	NA	9	NA	NA	9	2.96378	0.0149691	0	NA	NA	9	NA	NA	9	3.81914	0.00331535	0	NA	NA	9	42.5897	0.044058	0	NA	NA	9	-0.0231022	0.0101029	0	NA	NA	9	-0.0103392	0.0250973	0	0.0351898	0.0115713	0	262.094
2009-12-22 19:30:00	NA	NA	9	NA	NA	9	911.483	0.292611	0	NA	NA	9	NA	NA	9	2.98166	0.010468	0	NA	NA	9	NA	NA	9	3.8226	0.00358688	0	NA	NA	9	42.6094	0.0471009	0	NA	NA	9	0.000100301	0.0124752	0	NA	NA	9	0.00626069	0.0191991	0	0.0197115	0.0132177	0	171.045
2009-12-22 20:30:00	NA	NA	9	NA	NA	9	911.919	0.330231	0	NA	NA	9	NA	NA	9	2.92847	0.0245557	0	NA	NA	9	NA	NA	9	3.81706	0.00309423	0	NA	NA	9	42.6097	0.0445638	0	NA	NA	9	0.0233188	0.0408909	0	NA	NA	9	0.0207709	0.0176953	0	0.0483969	0.0248469	0	128.182
2009-12-22 21:30:00	NA	NA	9	NA	NA	9	912.33	0.392022	0	NA	NA	9	NA	NA	9	2.8638	0.0481059	0	NA	NA	9	NA	NA	9	3.81119	0.00510237	0	NA	NA	9	42.6211	0.0402835	0	NA	NA	9	-0.0972954	0.0336783	0	NA	NA	9	-0.0213061	0.0257026	0	0.102645	0.0343337	0	256.602
2009-12-22 22:30:00	NA	NA	9	NA	NA	9	912.52	0.319156	0	NA	NA	9	NA	NA	9	2.89431	0.0408929	0	NA	NA	9	NA	NA	9	3.81421	0.00456059	0	NA	NA	9	42.6186	0.0424462	0	NA	NA	9	-0.142295	0.0408439	0	NA	NA	9	-0.0415354	0.0334754	0	0.151287	0.0432841	0	254.333
2009-12-22 23:30:00	NA	NA	9	NA	NA	9	912.414	0.345389	0	NA	NA	9	NA	NA	9	3.00259	0.0251083	0	NA	NA	9	NA	NA	9	3.82262	0.00350215	0	NA	NA	9	42.5816	0.0450411	0	NA	NA	9	-0.137125	0.031289	0	NA	NA	9	-0.0936894	0.0312298	0	0.168486	0.0338712	0	235.81
2009-12-23 00:30:00	NA	NA	9	NA	NA	9	912.236	0.319449	0	NA	NA	9	NA	NA	9	3.01866	0.0148729	0	NA	NA	9	NA	NA	9	3.82382	0.00300136	0	NA	NA	9	42.5755	0.0413186	0	NA	NA	9	-0.134151	0.0442399	0	NA	NA	9	-0.0543751	0.0292418	0	0.146258	0.0487199	0	248.625
2009-12-23 01:30:00	NA	NA	9	NA	NA	9	911.927	0.307588	0	NA	NA	9	NA	NA	9	3.04004	0.016939	0	NA	NA	9	NA	NA	9	3.82599	0.00322042	0	NA	NA	9	42.5747	0.0381318	0	NA	NA	9	-0.0772977	0.0336576	0	NA	NA	9	-0.032104	0.0151607	0	0.0853165	0.0330033	0	245.281
2009-12-23 02:30:00	NA	NA	9	NA	NA	9	911.422	0.331318	0	NA	NA	9	NA	NA	9	3.08423	0.0183646	0	NA	NA	9	NA	NA	9	3.83019	0.0034601	0	NA	NA	9	42.5694	0.0455485	0	NA	NA	9	0.00258925	0.0143292	0	NA	NA	9	-0.024371	0.0116417	0	0.0286353	0.0110183	0	174.49
2009-12-23 03:30:00	NA	NA	9	NA	NA	9	910.967	0.31334	0	NA	NA	9	NA	NA	9	3.09815	0.0122268	0	NA	NA	9	NA	NA	9	3.83081	0.00335679	0	NA	NA	9	42.5592	0.0413816	0	NA	NA	9	-0.00241282	0.00959551	0	NA	NA	9	-0.0115023	0.0180199	0	0.0225632	0.00675343	0	188.093
2009-12-23 04:30:00	NA	NA	9	NA	NA	9	910.619	0.298499	0	NA	NA	9	NA	NA	9	3.08801	0.0102428	0	NA	NA	9	NA	NA	9	3.83058	0.00330252	0	NA	NA	9	42.5698	0.0435113	0	NA	NA	9	0.0285604	0.0178577	0	NA	NA	9	0.0103019	0.0155936	0	0.0341922	0.0177379	0	82.0018
2009-12-23 05:30:00	NA	NA	9	NA	NA	9	910.638	0.322288	0	NA	NA	9	NA	NA	9	2.94597	0.08515	0	NA	NA	9	NA	NA	9	3.81813	0.00719973	0	NA	NA	9	42.601	0.053431	0	NA	NA	9	0.120228	0.0392836	0	NA	NA	9	0.0362643	0.0195905	0	0.127098	0.0392768	0	72.5467
2009-12-23 06:30:00	NA	NA	9	NA	NA	9	910.815	0.30911	0	NA	NA	9	NA	NA	9	2.85411	0.0231433	0	NA	NA	9	NA	NA	9	3.81195	0.0032867	0	NA	NA	9	42.6444	0.0357468	0	NA	NA	9	0.0125994	0.0408048	0	NA	NA	9	0.0376495	0.0144267	0	0.0555353	0.0190888	0	177.582
2009-12-23 07:30:00	NA	NA	9	NA	NA	9	910.981	0.318303	0	NA	NA	9	NA	NA	9	2.88527	0.0171621	0	NA	NA	9	NA	NA	9	3.81582	0.00351366	0	NA	NA	9	42.6517	0.0369512	0	NA	NA	9	-0.0148214	0.017577	0	NA	NA	9	-0.0236102	0.0135901	0	0.0321001	0.0154984	0	202.822
2009-12-23 08:30:00	NA	NA	9	NA	NA	9	911.302	0.342435	0	NA	NA	9	NA	NA	9	2.87557	0.0216447	0	NA	NA	9	NA	NA	9	3.81547	0.00355899	0	NA	NA	9	42.66	0.0443939	0	NA	NA	9	-0.00226238	0.0177163	0	NA	NA	9	-0.019392	0.0100094	0	0.024913	0.0132073	0	189.517
2009-12-23 09:30:00	NA	NA	9	NA	NA	9	911.799	0.328046	0	NA	NA	9	NA	NA	9	2.87906	0.0174531	0	NA	NA	9	NA	NA	9	3.81448	0.00331735	0	NA	NA	9	42.6426	0.0394414	0	NA	NA	9	0.00145268	0.0141767	0	NA	NA	9	-0.0319683	0.0150019	0	0.0346495	0.0157935	0	175.192
2009-12-23 10:30:00	NA	NA	9	NA	NA	9	912.21	0.34474	0	NA	NA	9	NA	NA	9	2.90741	0.0152938	0	NA	NA	9	NA	NA	9	3.8163	0.00368725	0	NA	NA	9	42.6278	0.0437726	0	NA	NA	9	-0.0106376	0.0145128	0	NA	NA	9	-0.0120094	0.00797758	0	0.0209927	0.00953178	0	203.574
2009-12-23 11:30:00	NA	NA	9	NA	NA	9	912.527	0.294232	0	NA	NA	9	NA	NA	9	2.96084	0.030532	0	NA	NA	9	NA	NA	9	3.82022	0.00342374	0	NA	NA	9	42.6064	0.0443874	0	NA	NA	9	-0.122035	0.0560877	0	NA	NA	9	-0.0645792	0.0356234	0	0.140084	0.0620789	0	240.802
2009-12-23 12:30:00	NA	NA	9	NA	NA	9	912.661	0.330816	0	NA	NA	9	NA	NA	9	2.98193	0.0499554	0	NA	NA	9	NA	NA	9	3.82258	0.00516128	0	NA	NA	9	42.6081	0.0407777	0	NA	NA	9	-0.100822	0.0366397	0	NA	NA	9	-0.000467882	0.0242167	0	0.103919	0.0359803	0	267.195
2009-12-23 13:30:00	NA	NA	9	NA	NA	9	912.447	0.322551	0	NA	NA	9	NA	NA	9	3.04727	0.0353491	0	NA	NA	9	NA	NA	9	3.82738	0.00441052	0	NA	NA	9	42.5822	0.0463613	0	NA	NA	9	-0.0186408	0.0357736	0	NA	NA	9	-0.0226874	0.0151893	0	0.0456359	0.01701	0	210.769
2009-12-23 14:30:00	NA	NA	9	NA	NA	9	912.291	0.302887	0	NA	NA	9	NA	NA	9	3.01003	0.0140019	0	NA	NA	9	NA	NA	9	3.8254	0.00328933	0	NA	NA	9	42.6065	0.0419637	0	NA	NA	9	0.000651586	0.0187622	0	NA	NA	9	-0.0332539	0.0112219	0	0.0378168	0.0124058	0	176.053
2009-12-23 15:30:00	NA	NA	9	NA	NA	9	911.966	0.327756	0	NA	NA	9	NA	NA	9	3.03308	0.0121127	0	NA	NA	9	NA	NA	9	3.82762	0.00366216	0	NA	NA	9	42.6042	0.0440869	0	NA	NA	9	-0.0157129	0.00442634	0	NA	NA	9	-0.0251866	0.0077693	0	0.0300357	0.00768492	0	212.817
2009-12-23 16:30:00	NA	NA	9	NA	NA	9	911.483	0.324207	0	NA	NA	9	NA	NA	9	3.04482	0.0170788	0	NA	NA	9	NA	NA	9	3.82773	0.00378722	0	NA	NA	9	42.5905	0.0479393	0	NA	NA	9	-0.00893797	0.00900613	0	NA	NA	9	-0.0112805	0.00363061	0	0.0164698	0.00548972	0	211.349
2009-12-23 17:30:00	NA	NA	9	NA	NA	9	911.366	0.31311	0	NA	NA	9	NA	NA	9	3.01967	0.0241004	0	NA	NA	9	NA	NA	9	3.82621	0.00329714	0	NA	NA	9	42.6046	0.0424299	0	NA	NA	9	0.0341121	0.0206157	0	NA	NA	9	-0.00384644	0.0146413	0	0.0384562	0.0184052	0	109.614
2009-12-23 18:30:00	NA	NA	9	NA	NA	9	911.282	0.316974	0	NA	NA	9	NA	NA	9	2.97534	0.0139161	0	NA	NA	9	NA	NA	9	3.82306	0.00307761	0	NA	NA	9	42.6235	0.0394381	0	NA	NA	9	0.0113731	0.0348412	0	NA	NA	9	-0.012143	0.0157442	0	0.03639	0.0203415	0	153.999
2009-12-23 19:30:00	NA	NA	9	NA	NA	9	911.393	0.31955	0	NA	NA	9	NA	NA	9	2.97729	0.0232081	0	NA	NA	9	NA	NA	9	3.823	0.00374797	0	NA	NA	9	42.6202	0.0419507	0	NA	NA	9	-0.0470857	0.0219497	0	NA	NA	9	-0.0226687	0.0186049	0	0.0545995	0.0240337	0	244.286
2009-12-23 20:30:00	NA	NA	9	NA	NA	9	911.447	0.291897	0	NA	NA	9	NA	NA	9	3.00544	0.0120921	0	NA	NA	9	NA	NA	9	3.82446	0.00288442	0	NA	NA	9	42.6013	0.0370052	0	NA	NA	9	-0.0670489	0.0294476	0	NA	NA	9	-0.0365117	0.0242326	0	0.0786979	0.0330072	0	242.045
2009-12-23 21:30:00	NA	NA	9	NA	NA	9	911.648	0.316909	0	NA	NA	9	NA	NA	9	3.01603	0.0127466	0	NA	NA	9	NA	NA	9	3.8258	0.00360414	0	NA	NA	9	42.6041	0.0483141	0	NA	NA	9	-0.042103	0.0199341	0	NA	NA	9	-0.0147594	0.0128292	0	0.0471205	0.0182207	0	246.737
2009-12-23 22:30:00	NA	NA	9	NA	NA	9	911.795	0.325081	0	NA	NA	9	NA	NA	9	3.03661	0.0144216	0	NA	NA	9	NA	NA	9	3.82841	0.00322494	0	NA	NA	9	42.6096	0.0419677	0	NA	NA	9	-0.0250197	0.014762	0	NA	NA	9	-0.0185116	0.0168454	0	0.033858	0.0179969	0	234.752
2009-12-23 23:30:00	NA	NA	9	NA	NA	9	911.895	0.315834	0	NA	NA	9	NA	NA	9	3.05642	0.013277	0	NA	NA	9	NA	NA	9	3.8309	0.00321161	0	NA	NA	9	42.6145	0.0420708	0	NA	NA	9	-0.0091495	0.00919728	0	NA	NA	9	-0.00709544	0.0116134	0	0.0157982	0.0101919	0	231.958
2009-12-24 00:30:00	NA	NA	9	NA	NA	9	911.989	0.277635	0	NA	NA	9	NA	NA	9	3.03927	0.0137828	0	NA	NA	9	NA	NA	9	3.82971	0.00338677	0	NA	NA	9	42.6221	0.0432971	0	NA	NA	9	-0.00722593	0.0183292	0	NA	NA	9	-0.018551	0.0117558	0	0.0248247	0.0159413	0	183.705
2009-12-24 01:30:00	NA	NA	9	NA	NA	9	911.77	0.313441	0	NA	NA	9	NA	NA	9	3.05377	0.0136595	0	NA	NA	9	NA	NA	9	3.83015	0.00349942	0	NA	NA	9	42.6087	0.0466917	0	NA	NA	9	-0.00465038	0.00917686	0	NA	NA	9	-0.020915	0.00736856	0	0.0228709	0.00862901	0	186.452
2009-12-24 02:30:00	NA	NA	9	NA	NA	9	911.56	0.281918	0	NA	NA	9	NA	NA	9	3.06043	0.0142919	0	NA	NA	9	NA	NA	9	3.83064	0.00333585	0	NA	NA	9	42.6063	0.0423233	0	NA	NA	9	0.00757711	0.00343223	0	NA	NA	9	-0.00633475	0.00656394	0	0.0114936	0.00450396	0	126.278
2009-12-24 03:30:00	NA	NA	9	NA	NA	9	911.353	0.352249	0	NA	NA	9	NA	NA	9	3.03371	0.0122511	0	NA	NA	9	NA	NA	9	3.82823	0.00347241	0	NA	NA	9	42.6113	0.0451367	0	NA	NA	9	0.0155183	0.00643355	0	NA	NA	9	-0.0101892	0.00899133	0	0.0195556	0.00918838	0	117.214
2009-12-24 04:30:00	NA	NA	9	NA	NA	9	911.236	0.31411	0	NA	NA	9	NA	NA	9	2.92307	0.0606538	0	NA	NA	9	NA	NA	9	3.81868	0.0050969	0	NA	NA	9	42.6376	0.0518222	0	NA	NA	9	0.0629951	0.0279542	0	NA	NA	9	-0.00578701	0.0152381	0	0.0662161	0.0251141	0	101.931
2009-12-24 05:30:00	NA	NA	9	NA	NA	9	911.042	0.335892	0	NA	NA	9	NA	NA	9	2.88723	0.0113223	0	NA	NA	9	NA	NA	9	3.81756	0.00355445	0	NA	NA	9	42.6709	0.0446872	0	NA	NA	9	0.0164905	0.0203516	0	NA	NA	9	-0.0242736	0.00790401	0	0.0347284	0.0114698	0	153.114
2009-12-24 06:30:00	NA	NA	9	NA	NA	9	910.871	0.302625	0	NA	NA	9	NA	NA	9	2.90743	0.0119462	0	NA	NA	9	NA	NA	9	3.81906	0.00367407	0	NA	NA	9	42.6632	0.0462807	0	NA	NA	9	-0.0204848	0.0133608	0	NA	NA	9	-0.0200183	0.0118493	0	0.0317754	0.0113798	0	225.542
2009-12-24 07:30:00	NA	NA	9	NA	NA	9	911.077	0.333297	0	NA	NA	9	NA	NA	9	2.89305	0.0423396	0	NA	NA	9	NA	NA	9	3.81702	0.00437813	0	NA	NA	9	42.6565	0.0400955	0	NA	NA	9	-0.0738777	0.0399206	0	NA	NA	9	-0.00364243	0.0149225	0	0.0765252	0.037831	0	260.815
2009-12-24 08:30:00	NA	NA	9	NA	NA	9	911.308	0.293797	0	NA	NA	9	NA	NA	9	2.88562	0.024469	0	NA	NA	9	NA	NA	9	3.81602	0.00313835	0	NA	NA	9	42.6536	0.036054	0	NA	NA	9	-0.090163	0.0315546	0	NA	NA	9	-0.0107505	0.0189551	0	0.0931163	0.0304804	0	260.788
2009-12-24 09:30:00	NA	NA	9	NA	NA	9	911.479	0.329643	0	NA	NA	9	NA	NA	9	2.98115	0.0272301	0	NA	NA	9	NA	NA	9	3.82376	0.0033349	0	NA	NA	9	42.6246	0.0380426	0	NA	NA	9	-0.102908	0.0338369	0	NA	NA	9	-0.014236	0.0218582	0	0.10654	0.032623	0	260.683
2009-12-24 10:30:00	NA	NA	9	NA	NA	9	911.757	0.319371	0	NA	NA	9	NA	NA	9	3.04644	0.0443486	0	NA	NA	9	NA	NA	9	3.82892	0.00434273	0	NA	NA	9	42.603	0.0458115	0	NA	NA	9	-0.0787069	0.0247536	0	NA	NA	9	-0.009022	0.0217911	0	0.0823831	0.0240104	0	262.249
2009-12-24 11:30:00	NA	NA	9	NA	NA	9	912.194	0.318713	0	NA	NA	9	NA	NA	9	3.07389	0.0141927	0	NA	NA	9	NA	NA	9	3.8311	0.00317346	0	NA	NA	9	42.5939	0.0397107	0	NA	NA	9	-0.0476712	0.0270324	0	NA	NA	9	-0.0280846	0.0206261	0	0.0606348	0.0232498	0	235.177
2009-12-24 12:30:00	NA	NA	9	NA	NA	9	912.358	0.332684	0	NA	NA	9	NA	NA	9	3.0734	0.0217468	0	NA	NA	9	NA	NA	9	3.83132	0.00339389	0	NA	NA	9	42.5972	0.0428423	0	NA	NA	9	-0.0240394	0.0144862	0	NA	NA	9	-0.0355553	0.020001	0	0.0443792	0.0219631	0	215.194
2009-12-24 13:30:00	NA	NA	9	NA	NA	9	912.548	0.3209	0	NA	NA	9	NA	NA	9	3.05273	0.0247871	0	NA	NA	9	NA	NA	9	3.83104	0.0034335	0	NA	NA	9	42.6207	0.0462881	0	NA	NA	9	0.0101121	0.0171233	0	NA	NA	9	0.00651713	0.0245272	0	0.0298841	0.0120847	0	95.3626
2009-12-24 14:30:00	NA	NA	9	NA	NA	9	912.82	0.328649	0	NA	NA	9	NA	NA	9	2.88198	0.0670212	0	NA	NA	9	NA	NA	9	3.81673	0.00596934	0	NA	NA	9	42.6663	0.0529341	0	NA	NA	9	0.0439476	0.0505475	0	NA	NA	9	0.0154938	0.024452	0	0.0584927	0.0436155	0	101.413
2009-12-24 15:30:00	NA	NA	9	NA	NA	9	912.539	0.324603	0	NA	NA	9	NA	NA	9	2.88017	0.0175016	0	NA	NA	9	NA	NA	9	3.81778	0.00356014	0	NA	NA	9	42.6821	0.0432368	0	NA	NA	9	-0.00954255	0.00832942	0	NA	NA	9	-0.0276655	0.0130108	0	0.030714	0.0123165	0	201.175
2009-12-24 16:30:00	NA	NA	9	NA	NA	9	912.094	0.335214	0	NA	NA	9	NA	NA	9	2.89792	0.0160673	0	NA	NA	9	NA	NA	9	3.81911	0.0034917	0	NA	NA	9	42.6756	0.0421165	0	NA	NA	9	0.00882143	0.019237	0	NA	NA	9	-0.0174738	0.0190205	0	0.0291484	0.0162819	0	164.15
2009-12-24 17:30:00	NA	NA	9	NA	NA	9	911.743	0.337537	0	NA	NA	9	NA	NA	9	2.9378	0.0162541	0	NA	NA	9	NA	NA	9	3.82278	0.00355527	0	NA	NA	9	42.6693	0.0414201	0	NA	NA	9	-0.0111533	0.0104878	0	NA	NA	9	-0.020048	0.0150018	0	0.026719	0.012139	0	215.496
2009-12-24 18:30:00	NA	NA	9	NA	NA	9	911.291	0.310632	0	NA	NA	9	NA	NA	9	3.00197	0.0213171	0	NA	NA	9	NA	NA	9	3.82766	0.00326311	0	NA	NA	9	42.6461	0.041647	0	NA	NA	9	-0.0119298	0.00687862	0	NA	NA	9	-0.0101026	0.00589925	0	0.0162506	0.00789977	0	228.337
2009-12-24 19:30:00	NA	NA	9	NA	NA	9	911.051	0.296334	0	NA	NA	9	NA	NA	9	3.03466	0.012187	0	NA	NA	9	NA	NA	9	3.83037	0.00329754	0	NA	NA	9	42.637	0.0434437	0	NA	NA	9	0.00803815	0.0153751	0	NA	NA	9	0.00111608	0.00605148	0	0.0139973	0.0119531	0	177.422
2009-12-24 20:30:00	NA	NA	9	NA	NA	9	911.166	0.315832	0	NA	NA	9	NA	NA	9	2.9566	0.0375648	0	NA	NA	9	NA	NA	9	3.82379	0.00472338	0	NA	NA	9	42.6574	0.048865	0	NA	NA	9	0.02621	0.0265647	0	NA	NA	9	-0.00203267	0.0147981	0	0.0354427	0.0189542	0	147.146
2009-12-24 21:30:00	NA	NA	9	NA	NA	9	911.397	0.288766	0	NA	NA	9	NA	NA	9	2.92216	0.0254108	0	NA	NA	9	NA	NA	9	3.82188	0.00343769	0	NA	NA	9	42.6788	0.0447917	0	NA	NA	9	-0.0183414	0.011003	0	NA	NA	9	-0.00602454	0.0167281	0	0.0252542	0.0116481	0	261.574
2009-12-24 22:30:00	NA	NA	9	NA	NA	9	911.555	0.371251	0	NA	NA	9	NA	NA	9	2.91772	0.0357465	0	NA	NA	9	NA	NA	9	3.81977	0.00451922	0	NA	NA	9	42.6581	0.041977	0	NA	NA	9	-0.0410911	0.0352365	0	NA	NA	9	-0.00667646	0.0236959	0	0.0504546	0.0314649	0	241.247
2009-12-24 23:30:00	NA	NA	9	NA	NA	9	911.911	0.339006	0	NA	NA	9	NA	NA	9	2.8838	0.0257948	0	NA	NA	9	NA	NA	9	3.81721	0.00351734	0	NA	NA	9	42.6705	0.042297	0	NA	NA	9	-0.0696652	0.0252086	0	NA	NA	9	0.00436938	0.0181486	0	0.0721966	0.0249928	0	271.113
2009-12-25 00:30:00	NA	NA	9	NA	NA	9	911.957	0.325452	0	NA	NA	9	NA	NA	9	2.92939	0.0195764	0	NA	NA	9	NA	NA	9	3.82161	0.00369878	0	NA	NA	9	42.6655	0.0428418	0	NA	NA	9	-0.0275051	0.0190032	0	NA	NA	9	-0.00674961	0.00918056	0	0.0303994	0.0179807	0	248.26
2009-12-25 01:30:00	NA	NA	9	NA	NA	9	912.195	0.324805	0	NA	NA	9	NA	NA	9	2.86468	0.0400098	0	NA	NA	9	NA	NA	9	3.81737	0.0045671	0	NA	NA	9	42.6975	0.0478244	0	NA	NA	9	0.0141737	0.0412626	0	NA	NA	9	0.00568006	0.0157512	0	0.0350545	0.0308947	0	175.579
2009-12-25 02:30:00	NA	NA	9	NA	NA	9	912.064	0.326302	0	NA	NA	9	NA	NA	9	2.90512	0.0467378	0	NA	NA	9	NA	NA	9	3.82101	0.00450204	0	NA	NA	9	42.69	0.0503271	0	NA	NA	9	-0.0232758	0.0143751	0	NA	NA	9	-0.00657515	0.0136897	0	0.0299749	0.00896522	0	246.518
2009-12-25 03:30:00	NA	NA	9	NA	NA	9	911.707	0.335264	0	NA	NA	9	NA	NA	9	2.93734	0.0238942	0	NA	NA	9	NA	NA	9	3.82267	0.00364816	0	NA	NA	9	42.6685	0.0434619	0	NA	NA	9	0.000189804	0.00761842	0	NA	NA	9	-0.0302361	0.00778518	0	0.0312014	0.00770346	0	178.593
2009-12-25 04:30:00	NA	NA	9	NA	NA	9	911.711	0.303663	0	NA	NA	9	NA	NA	9	2.84966	0.0396741	0	NA	NA	9	NA	NA	9	3.81567	0.00401365	0	NA	NA	9	42.6964	0.0486972	0	NA	NA	9	0.0457268	0.025398	0	NA	NA	9	0.0051339	0.020538	0	0.0515859	0.0228639	0	98.8131
2009-12-25 05:30:00	NA	NA	9	NA	NA	9	911.486	0.299231	0	NA	NA	9	NA	NA	9	2.82402	0.0161541	0	NA	NA	9	NA	NA	9	3.81476	0.00390256	0	NA	NA	9	42.719	0.0469802	0	NA	NA	9	-0.00541167	0.00536601	0	NA	NA	9	-0.0133442	0.0119908	0	0.0162736	0.0107267	0	202.075
2009-12-25 06:30:00	NA	NA	9	NA	NA	9	911.251	0.317683	0	NA	NA	9	NA	NA	9	2.82691	0.0150232	0	NA	NA	9	NA	NA	9	3.81461	0.00346708	0	NA	NA	9	42.7135	0.0466631	0	NA	NA	9	0.00481411	0.00842629	0	NA	NA	9	-0.023278	0.00580337	0	0.025299	0.00544457	0	168.345
2009-12-25 07:30:00	NA	NA	9	NA	NA	9	911.263	0.316127	0	NA	NA	9	NA	NA	9	2.81878	0.0123528	0	NA	NA	9	NA	NA	9	3.81411	0.00344465	0	NA	NA	9	42.7179	0.0421539	0	NA	NA	9	0.0134876	0.0113849	0	NA	NA	9	-0.0221301	0.00633388	0	0.0281978	0.00679739	0	150.247
2009-12-25 08:30:00	NA	NA	9	NA	NA	9	911.392	0.290292	0	NA	NA	9	NA	NA	9	2.82213	0.014205	0	NA	NA	9	NA	NA	9	3.81439	0.00331853	0	NA	NA	9	42.7168	0.0444179	0	NA	NA	9	-0.00320376	0.0148454	0	NA	NA	9	-0.0230735	0.0152108	0	0.0287814	0.0128794	0	178.837
2009-12-25 09:30:00	NA	NA	9	NA	NA	9	911.556	0.337748	0	NA	NA	9	NA	NA	9	2.83033	0.0141657	0	NA	NA	9	NA	NA	9	3.81482	0.00368748	0	NA	NA	9	42.7114	0.0463426	0	NA	NA	9	0.00397611	0.0168623	0	NA	NA	9	-0.0215203	0.015629	0	0.0302871	0.00948597	0	163.393
2009-12-25 10:30:00	NA	NA	9	NA	NA	9	912.302	0.35342	0	NA	NA	9	NA	NA	9	2.66369	0.0360864	0	NA	NA	9	NA	NA	9	3.79867	0.00405472	0	NA	NA	9	42.7282	0.0369914	0	NA	NA	9	-0.114823	0.0348541	0	NA	NA	9	0.0164705	0.0197884	0	0.117814	0.0343746	0	276.555
2009-12-25 11:30:00	NA	NA	9	NA	NA	9	912.826	0.349699	0	NA	NA	9	NA	NA	9	2.62207	0.013197	0	NA	NA	9	NA	NA	9	3.79603	0.00304177	0	NA	NA	9	42.7498	0.0421604	0	NA	NA	9	-0.154375	0.0355103	0	NA	NA	9	0.00175537	0.0230796	0	0.156157	0.0352561	0	269.909
2009-12-25 12:30:00	NA	NA	9	NA	NA	9	913.052	0.32699	0	NA	NA	9	NA	NA	9	2.66049	0.0127197	0	NA	NA	9	NA	NA	9	3.80004	0.00320113	0	NA	NA	9	42.7493	0.0412823	0	NA	NA	9	-0.150929	0.041301	0	NA	NA	9	-0.00194029	0.0236492	0	0.152964	0.040619	0	267.926
2009-12-25 13:30:00	NA	NA	9	NA	NA	9	913.302	0.303961	0	NA	NA	9	NA	NA	9	2.67536	0.0178837	0	NA	NA	9	NA	NA	9	3.80169	0.00261836	0	NA	NA	9	42.7502	0.0380795	0	NA	NA	9	-0.106014	0.0326867	0	NA	NA	9	-0.015373	0.0249987	0	0.109997	0.0326948	0	260.914
2009-12-25 14:30:00	NA	NA	9	NA	NA	9	913.27	0.318884	0	NA	NA	9	NA	NA	9	2.72408	0.0328138	0	NA	NA	9	NA	NA	9	3.80551	0.00403206	0	NA	NA	9	42.7338	0.0424907	0	NA	NA	9	-0.0942084	0.028221	0	NA	NA	9	-0.0228442	0.0248249	0	0.0999104	0.028764	0	255.779
2009-12-25 15:30:00	NA	NA	9	NA	NA	9	913.059	0.317516	0	NA	NA	9	NA	NA	9	2.7726	0.0276305	0	NA	NA	9	NA	NA	9	3.81007	0.00360494	0	NA	NA	9	42.727	0.036286	0	NA	NA	9	-0.0675279	0.0201273	0	NA	NA	9	-0.030014	0.0149502	0	0.0755028	0.0197145	0	245.221
2009-12-25 16:30:00	NA	NA	9	NA	NA	9	912.662	0.350661	0	NA	NA	9	NA	NA	9	2.82644	0.019676	0	NA	NA	9	NA	NA	9	3.81417	0.0036456	0	NA	NA	9	42.7077	0.0428065	0	NA	NA	9	-0.0498404	0.0260798	0	NA	NA	9	-0.021566	0.0161119	0	0.0581588	0.0224992	0	241.647
2009-12-25 17:30:00	NA	NA	9	NA	NA	9	912.301	0.356773	0	NA	NA	9	NA	NA	9	2.80157	0.015031	0	NA	NA	3	NA	NA	9	3.81195	0.00307284	0	NA	NA	9	42.7129	0.0413235	0	NA	NA	9	-0.0854775	0.026839	0	NA	NA	9	-0.0166866	0.0186245	0	0.0891625	0.0264933	0	257.85
2009-12-25 18:30:00	NA	NA	9	NA	NA	9	911.9	0.359111	0	NA	NA	9	NA	NA	9	2.81095	0.0144508	0	NA	NA	3	NA	NA	9	3.81275	0.00282523	0	NA	NA	9	42.7108	0.0384794	0	NA	NA	9	-0.104057	0.0284209	0	NA	NA	9	-0.00486349	0.0196964	0	0.106171	0.0278326	0	266.304
2009-12-25 19:30:00	NA	NA	9	NA	NA	9	911.557	0.333033	0	NA	NA	9	NA	NA	9	2.82402	0.0132928	0	NA	NA	9	NA	NA	9	3.81393	0.0025714	0	NA	NA	9	42.7085	0.0344292	0	NA	NA	9	-0.0878711	0.028921	0	NA	NA	9	-0.037082	0.0265602	0	0.0982972	0.031235	0	247.173
2009-12-25 20:30:00	NA	NA	9	NA	NA	9	911.349	0.299737	0	NA	NA	9	NA	NA	9	2.85722	0.0149211	0	NA	NA	9	NA	NA	9	3.81711	0.00300097	0	NA	NA	9	42.7047	0.0391817	0	NA	NA	9	-0.0648953	0.0193121	0	NA	NA	9	-0.0224733	0.013377	0	0.0700578	0.0189775	0	250.222
2009-12-25 21:30:00	NA	NA	9	NA	NA	9	911.122	0.321433	0	NA	NA	9	NA	NA	9	2.8866	0.0255478	0	NA	NA	9	NA	NA	9	3.81992	0.0037512	0	NA	NA	9	42.7013	0.0429378	0	NA	NA	9	-0.0287392	0.0305949	0	NA	NA	9	-0.0110183	0.0271418	0	0.0435874	0.026827	0	226.946
2009-12-25 22:30:00	NA	NA	9	NA	NA	9	911.281	0.305061	0	NA	NA	9	NA	NA	9	2.85704	0.0105459	0	NA	NA	9	NA	NA	9	3.81843	0.00344972	0	NA	NA	9	42.7216	0.0457771	0	NA	NA	9	0.00396279	0.0138728	0	NA	NA	9	0.0187784	0.0136847	0	0.02503	0.0110185	0	128.216
2009-12-25 23:30:00	NA	NA	9	NA	NA	9	911.479	0.361937	0	NA	NA	9	NA	NA	9	2.85712	0.0102901	0	NA	NA	9	NA	NA	9	3.81863	0.00329047	0	NA	NA	9	42.7239	0.04216	0	NA	NA	9	0.036677	0.0125025	0	NA	NA	9	0.0142994	0.00782259	0	0.0400402	0.0128037	0	68.6497
2009-12-26 00:30:00	NA	NA	9	NA	NA	9	911.688	0.357756	0	NA	NA	9	NA	NA	9	2.85589	0.0127354	0	NA	NA	9	NA	NA	9	3.81873	0.00364689	0	NA	NA	9	42.7267	0.0479584	0	NA	NA	9	0.00830955	0.0162248	0	NA	NA	9	-0.012183	0.00743803	0	0.0212409	0.00920518	0	158.057
2009-12-26 01:30:00	NA	NA	9	NA	NA	9	911.857	0.327724	0	NA	NA	9	NA	NA	9	2.85571	0.0128813	0	NA	NA	9	NA	NA	9	3.81906	0.00327885	0	NA	NA	9	42.7309	0.0449268	0	NA	NA	9	-0.00443746	0.00785031	0	NA	NA	9	-0.00999079	0.010292	0	0.0158629	0.00594598	0	201.877
2009-12-26 02:30:00	NA	NA	9	NA	NA	9	912.162	0.345053	0	NA	NA	9	NA	NA	9	2.82757	0.0192139	0	NA	NA	9	NA	NA	9	3.81517	0.00350736	0	NA	NA	9	42.719	0.0469901	0	NA	NA	9	-0.0249416	0.0169197	0	NA	NA	9	-0.00820406	0.0113581	0	0.0298754	0.0145609	0	244.926
2009-12-26 03:30:00	NA	NA	9	NA	NA	9	912.173	0.348897	0	NA	NA	9	NA	NA	9	2.8405	0.0138673	0	NA	NA	9	NA	NA	9	3.8159	0.00297668	0	NA	NA	9	42.7111	0.040089	0	NA	NA	9	-0.0364253	0.0298517	0	NA	NA	9	-0.0317713	0.0223146	0	0.0552324	0.0259666	0	225.011
2009-12-26 04:30:00	NA	NA	9	NA	NA	9	911.97	0.315393	0	NA	NA	9	NA	NA	9	2.88336	0.0354682	0	NA	NA	9	NA	NA	9	3.8198	0.00380533	0	NA	NA	9	42.7035	0.0460241	0	NA	NA	9	-0.040702	0.0169693	0	NA	NA	9	-0.0436524	0.0256037	0	0.0637689	0.020951	0	225.356
2009-12-26 05:30:00	NA	NA	9	NA	NA	9	911.764	0.291641	0	NA	NA	9	NA	NA	9	2.90417	0.0157023	0	NA	NA	9	NA	NA	9	3.82219	0.00336561	0	NA	NA	9	42.7062	0.0439532	0	NA	NA	9	-0.0534874	0.0127591	0	NA	NA	9	-0.0351814	0.0206102	0	0.0669209	0.014408	0	237.463
2009-12-26 06:30:00	NA	NA	9	NA	NA	9	911.468	0.323163	0	NA	NA	9	NA	NA	9	2.95484	0.0100956	0	NA	NA	9	NA	NA	9	3.71065	0.0501817	0	NA	NA	9	41.2478	0.628031	0	NA	NA	9	-0.059859	0.0210562	0	NA	NA	9	-0.00829457	0.0147017	0	0.0626344	0.0197025	0	259.684
2009-12-26 07:30:00	NA	NA	9	NA	NA	9	911.298	0.328855	0	NA	NA	9	NA	NA	9	2.93245	0.0305144	0	NA	NA	9	NA	NA	9	3.81828	0.0169434	0	NA	NA	9	42.6203	0.223957	0	NA	NA	9	0.000226672	0.0251898	0	NA	NA	9	-0.00915404	0.00913466	0	0.0242968	0.0145327	0	174.886
2009-12-26 08:30:00	NA	NA	9	NA	NA	9	911.239	0.298455	0	NA	NA	9	NA	NA	9	2.90342	0.0193859	0	NA	NA	9	NA	NA	9	3.82294	0.00305039	0	NA	NA	9	42.7169	0.0469709	0	NA	NA	9	-0.00851838	0.0284364	0	NA	NA	9	-0.0179011	0.012568	0	0.0264229	0.0257149	0	174.102
2009-12-26 09:30:00	NA	NA	9	NA	NA	9	911.468	0.328128	0	NA	NA	9	NA	NA	9	2.89339	0.0190718	0	NA	NA	9	NA	NA	9	3.8199	0.0033796	0	NA	NA	9	42.6918	0.0390461	0	NA	NA	9	-0.0893015	0.02069	0	NA	NA	9	-0.0405413	0.0110481	0	0.0986314	0.0209823	0	245.243
2009-12-26 10:30:00	NA	NA	9	NA	NA	9	911.762	0.366568	0	NA	NA	9	NA	NA	9	2.87859	0.0138244	0	NA	NA	9	NA	NA	9	3.81891	0.00316383	0	NA	NA	9	42.6988	0.0394029	0	NA	NA	9	-0.0685773	0.0194065	0	NA	NA	9	-0.0328556	0.0182975	0	0.07716	0.0232375	0	245.1
2009-12-26 11:30:00	NA	NA	9	NA	NA	9	912.026	0.306011	0	NA	NA	9	NA	NA	9	2.91278	0.0175193	0	NA	NA	9	NA	NA	9	3.82312	0.0034924	0	NA	NA	9	42.7063	0.0424817	0	NA	NA	9	-0.0513366	0.0285683	0	NA	NA	9	-0.0359672	0.0138634	0	0.0647233	0.0273526	0	232.224
2009-12-26 12:30:00	NA	NA	9	NA	NA	9	912.381	0.301499	0	NA	NA	9	NA	NA	9	2.9224	0.0146296	0	NA	NA	9	NA	NA	9	3.82385	0.00357078	0	NA	NA	9	42.7025	0.0464945	0	NA	NA	9	-0.0195117	0.0125382	0	NA	NA	9	-0.0347647	0.0130797	0	0.0415698	0.0137639	0	208.037
2009-12-26 13:30:00	NA	NA	9	NA	NA	9	912.654	0.296966	0	NA	NA	9	NA	NA	9	2.94081	0.0244919	0	NA	NA	9	NA	NA	9	3.82624	0.00388264	0	NA	NA	9	42.708	0.0437673	0	NA	NA	9	-0.0114705	0.00631163	0	NA	NA	9	-0.0127943	0.00900702	0	0.0184848	0.00863235	0	224.821
2009-12-26 14:30:00	NA	NA	9	NA	NA	9	912.762	0.325411	0	NA	NA	9	NA	NA	9	2.94452	0.0155496	0	NA	NA	9	NA	NA	9	3.82501	0.00342785	0	NA	NA	9	42.6876	0.0454174	0	NA	NA	9	0.0112067	0.0136023	0	NA	NA	9	-0.0263271	0.00612887	0	0.0306296	0.0101513	0	163.495
2009-12-26 15:30:00	NA	NA	9	NA	NA	9	912.782	0.309047	0	NA	NA	9	NA	NA	9	2.94802	0.0122726	0	NA	NA	9	NA	NA	9	3.82568	0.00343816	0	NA	NA	9	42.6913	0.0449123	0	NA	NA	9	-0.00477323	0.00839544	0	NA	NA	9	-0.0432542	0.0158984	0	0.0442642	0.01605	0	183.763
2009-12-26 16:30:00	NA	NA	9	NA	NA	9	912.685	0.370424	0	NA	NA	9	NA	NA	9	2.96934	0.0201235	0	NA	NA	9	NA	NA	9	3.82716	0.00410754	0	NA	NA	9	42.6819	0.0514106	0	NA	NA	9	0.0200861	0.0110617	0	NA	NA	9	-0.0149067	0.010736	0	0.0281862	0.00829007	0	128.655
2009-12-26 17:30:00	NA	NA	9	NA	NA	9	912.304	0.325396	0	NA	NA	9	NA	NA	9	2.97597	0.0182762	0	NA	NA	9	NA	NA	9	3.82792	0.00368904	0	NA	NA	9	42.6829	0.0454394	0	NA	NA	9	0.0153108	0.00635546	0	NA	NA	9	-0.0065859	0.00500166	0	0.0175485	0.005936	0	115.008
2009-12-26 18:30:00	NA	NA	9	NA	NA	9	911.892	0.356858	0	NA	NA	9	NA	NA	9	2.98197	0.0156514	0	NA	NA	9	NA	NA	9	3.82853	0.00340103	0	NA	NA	9	42.6829	0.0464698	0	NA	NA	9	0.00631715	0.00299062	0	NA	NA	9	-0.0110189	0.00699966	0	0.0135433	0.00598562	0	146.242
2009-12-26 19:30:00	NA	NA	9	NA	NA	9	911.406	0.337649	0	NA	NA	9	NA	NA	9	2.98591	0.013446	0	NA	NA	9	NA	NA	9	3.82939	0.00343614	0	NA	NA	9	42.6888	0.0475102	0	NA	NA	9	0.00322208	0.00506973	0	NA	NA	9	-0.0225931	0.00422862	0	0.0234653	0.00371147	0	170.314
2009-12-26 20:30:00	NA	NA	9	NA	NA	9	911.015	0.344115	0	NA	NA	9	NA	NA	9	2.97714	0.0213674	0	NA	NA	9	NA	NA	9	3.82911	0.0036982	0	NA	NA	9	42.6971	0.0468682	0	NA	NA	9	0.00692426	0.00482269	0	NA	NA	9	-0.0146035	0.00678151	0	0.0171661	0.00598001	0	149.342
2009-12-26 21:30:00	NA	NA	9	NA	NA	9	910.72	0.331996	0	NA	NA	9	NA	NA	9	2.99231	0.0152574	0	NA	NA	9	NA	NA	9	3.8279	0.00366877	0	NA	NA	9	42.6621	0.0444036	0	NA	NA	9	0.0151526	0.00266224	0	NA	NA	9	-0.0224405	0.00398947	0	0.0272176	0.00392168	0	145.685
2009-12-26 22:30:00	NA	NA	9	NA	NA	9	910.605	0.312872	0	NA	NA	9	NA	NA	9	2.99873	0.0192116	0	NA	NA	9	NA	NA	9	3.82847	0.00356027	0	NA	NA	9	42.6609	0.0457758	0	NA	NA	9	0.00356959	0.00796361	0	NA	NA	9	-0.0296899	0.00938733	0	0.0312632	0.00826647	0	169.385
2009-12-26 23:30:00	NA	NA	9	NA	NA	9	910.618	0.361798	0	NA	NA	9	NA	NA	9	3.01623	0.0237536	0	NA	NA	9	NA	NA	9	3.83044	0.00378616	0	NA	NA	9	42.6624	0.0485106	0	NA	NA	9	0.0043116	0.00931128	0	NA	NA	9	-0.0232252	0.00703564	0	0.0257468	0.00558947	0	165.213
2009-12-27 00:30:00	NA	NA	9	NA	NA	9	911.055	0.355686	0	NA	NA	9	NA	NA	9	3.00954	0.0100116	0	NA	NA	9	NA	NA	9	3.83053	0.00366023	0	NA	NA	9	42.6721	0.0464205	0	NA	NA	9	-0.00816277	0.0095854	0	NA	NA	9	-0.0292715	0.010844	0	0.0315471	0.011733	0	192.979
2009-12-27 01:30:00	NA	NA	9	NA	NA	9	911.285	0.296695	0	NA	NA	9	NA	NA	9	3.06551	0.0313981	0	NA	NA	9	NA	NA	9	3.83423	0.00422431	0	NA	NA	9	42.6445	0.0476612	0	NA	NA	9	-0.0036276	0.0132553	0	NA	NA	9	-0.0058787	0.0166382	0	0.0183543	0.0127753	0	196.212
2009-12-27 02:30:00	NA	NA	9	NA	NA	9	911.759	0.368124	0	NA	NA	9	NA	NA	9	2.95866	0.0406311	0	NA	NA	9	NA	NA	9	3.82575	0.0045215	0	NA	NA	9	42.679	0.0478119	0	NA	NA	9	0.0111639	0.0255751	0	NA	NA	9	0.00525044	0.0136259	0	0.0279564	0.0144928	0	136.883
2009-12-27 03:30:00	NA	NA	9	NA	NA	9	912.111	0.319461	0	NA	NA	9	NA	NA	9	2.88232	0.0226937	0	NA	NA	9	NA	NA	9	3.81937	0.00358059	0	NA	NA	9	42.6995	0.0439978	0	NA	NA	9	0.0456748	0.0322892	0	NA	NA	9	-0.000304048	0.0234867	0	0.0546831	0.026263	0	104.201
2009-12-27 04:30:00	NA	NA	9	NA	NA	9	912.244	0.369863	0	NA	NA	9	NA	NA	9	2.86583	0.0133235	0	NA	NA	9	NA	NA	9	3.81932	0.0032572	0	NA	NA	9	42.7205	0.0422472	0	NA	NA	9	0.00288144	0.0122081	0	NA	NA	9	-0.0287167	0.0166781	0	0.0313912	0.0165727	0	167.253
2009-12-27 05:30:00	NA	NA	9	NA	NA	9	912.063	0.321754	0	NA	NA	9	NA	NA	9	2.90195	0.0195993	0	NA	NA	9	NA	NA	9	3.82329	0.00401947	0	NA	NA	9	42.7227	0.0501724	0	NA	NA	9	-0.00356134	0.00462669	0	NA	NA	9	-0.00639461	0.00482855	0	0.00906585	0.00401122	0	212.434
2009-12-27 06:30:00	NA	NA	9	NA	NA	9	911.892	0.295252	0	NA	NA	9	NA	NA	9	2.90949	0.0170884	0	NA	NA	9	NA	NA	9	3.82242	0.00370433	0	NA	NA	9	42.7019	0.044191	0	NA	NA	9	0.0174442	0.00987914	0	NA	NA	9	-0.0226576	0.00858654	0	0.0300359	0.00931612	0	144.042
2009-12-27 07:30:00	NA	NA	9	NA	NA	9	911.668	0.321765	0	NA	NA	9	NA	NA	9	2.91855	0.0135298	0	NA	NA	9	NA	NA	9	3.82371	0.00307216	0	NA	NA	9	42.7062	0.0403843	0	NA	NA	9	0.0162494	0.00591917	0	NA	NA	9	-0.0131919	0.00515818	0	0.0218771	0.0045917	0	129.812
2009-12-27 08:30:00	NA	NA	9	NA	NA	9	911.41	0.322479	0	NA	NA	9	NA	NA	9	2.91292	0.0107016	0	NA	NA	9	NA	NA	9	3.82318	0.00363973	0	NA	NA	9	42.7073	0.0502239	0	NA	NA	9	0.0102054	0.00155399	0	NA	NA	9	-0.0195122	0.00231893	0	0.0220851	0.00221696	0	152.246
2009-12-27 09:30:00	NA	NA	9	NA	NA	9	911.549	0.302277	0	NA	NA	9	NA	NA	9	2.91792	0.0113568	0	NA	NA	9	NA	NA	9	3.82442	0.00319414	0	NA	NA	9	42.7161	0.0403356	0	NA	NA	9	-0.00693084	0.00742473	0	NA	NA	9	-0.0212997	0.00288586	0	0.0234274	0.00403763	0	195.971
2009-12-27 10:30:00	NA	NA	9	NA	NA	9	911.666	0.310604	0	NA	NA	9	NA	NA	9	2.92056	0.00974756	0	NA	NA	9	NA	NA	9	3.82374	0.00303729	0	NA	NA	9	42.704	0.0400363	0	NA	NA	9	-0.00250413	0.00328796	0	NA	NA	9	-0.026563	0.00474813	0	0.0269077	0.00460298	0	186.137
2009-12-27 11:30:00	NA	NA	9	NA	NA	9	911.799	0.300997	0	NA	NA	9	NA	NA	9	2.97264	0.0337499	0	NA	NA	9	NA	NA	9	3.82857	0.00416012	0	NA	NA	9	42.6957	0.0446966	0	NA	NA	9	0.00483232	0.00354248	0	NA	NA	9	-0.0110252	0.0116175	0	0.0141487	0.00960238	0	141.188
2009-12-27 12:30:00	NA	NA	9	NA	NA	9	912.182	0.303486	0	NA	NA	9	NA	NA	9	2.96354	0.0161185	0	NA	NA	9	NA	NA	9	3.82738	0.00355718	0	NA	NA	9	42.6926	0.0434906	0	NA	NA	9	0.0204761	0.00910233	0	NA	NA	9	-0.0315611	0.0130147	0	0.0382748	0.0142344	0	146.699
2009-12-27 13:30:00	NA	NA	9	NA	NA	9	912.563	0.368066	0	NA	NA	9	NA	NA	9	2.93555	0.0585134	0	NA	NA	9	NA	NA	9	3.82411	0.00597963	0	NA	NA	9	42.6883	0.0405749	0	NA	NA	9	-0.010142	0.0355651	0	NA	NA	9	-0.0112951	0.0138498	0	0.0319879	0.0257578	0	182.074
2009-12-27 14:30:00	NA	NA	9	NA	NA	9	913.173	0.320958	0	NA	NA	9	NA	NA	9	2.83446	0.0191693	0	NA	NA	9	NA	NA	9	3.8155	0.00299773	0	NA	NA	9	42.7134	0.0371189	0	NA	NA	9	-0.089623	0.0306615	0	NA	NA	9	-0.0148304	0.026632	0	0.094634	0.0307512	0	260.545
2009-12-27 15:30:00	NA	NA	9	NA	NA	9	913.554	0.358482	0	NA	NA	9	NA	NA	9	2.75346	0.041974	0	NA	NA	9	NA	NA	9	3.8089	0.00411102	0	NA	NA	9	42.7374	0.0372985	0	NA	NA	9	-0.109241	0.0414578	0	NA	NA	9	-0.0517316	0.032806	0	0.123942	0.0451938	0	244.685
2009-12-27 16:30:00	NA	NA	9	NA	NA	9	913.489	0.339074	0	NA	NA	9	NA	NA	9	2.77865	0.0610343	0	NA	NA	9	NA	NA	9	3.81169	0.00534263	0	NA	NA	9	42.7391	0.0385388	0	NA	NA	9	-0.122494	0.034511	0	NA	NA	9	-0.0520312	0.0271053	0	0.135323	0.0364034	0	246.712
2009-12-27 17:30:00	NA	NA	9	NA	NA	9	912.923	0.374746	0	NA	NA	9	NA	NA	9	2.94237	0.0438597	0	NA	NA	9	NA	NA	9	3.82509	0.00460045	0	NA	NA	9	42.6914	0.0397766	0	NA	NA	9	-0.107651	0.0303261	0	NA	NA	9	-0.0180709	0.02075	0	0.111364	0.0293812	0	259.507
2009-12-27 18:30:00	NA	NA	9	NA	NA	9	912.394	0.3315	0	NA	NA	9	NA	NA	9	2.96588	0.0159421	0	NA	NA	9	NA	NA	9	3.82788	0.00331403	0	NA	NA	9	42.6956	0.0449496	0	NA	NA	9	-0.0663259	0.0254445	0	NA	NA	9	-0.0504326	0.0359076	0	0.0902759	0.0269988	0	233.91
2009-12-27 19:30:00	NA	NA	9	NA	NA	9	911.822	0.351015	0	NA	NA	9	NA	NA	9	2.96769	0.0142476	0	NA	NA	9	NA	NA	9	3.82869	0.00335512	0	NA	NA	9	42.7037	0.0436588	0	NA	NA	9	-0.039579	0.0172172	0	NA	NA	9	-0.0520998	0.0178374	0	0.0667384	0.0210089	0	216.266
2009-12-27 20:30:00	NA	NA	9	NA	NA	9	911.32	0.341736	0	NA	NA	9	NA	NA	9	2.97995	0.0106668	0	NA	NA	9	NA	NA	9	3.82926	0.00334069	0	NA	NA	9	42.6951	0.0453535	0	NA	NA	9	-0.0157411	0.0152301	0	NA	NA	9	-0.043728	0.00997197	0	0.0488477	0.0102516	0	198.85
2009-12-27 21:30:00	NA	NA	9	NA	NA	9	910.78	0.301075	0	NA	NA	9	NA	NA	9	2.99917	0.0181597	0	NA	NA	9	NA	NA	9	3.82992	0.00328732	0	NA	NA	9	42.6784	0.0423677	0	NA	NA	9	0.00105422	0.0063421	0	NA	NA	9	-0.0221461	0.014217	0	0.0233602	0.0137177	0	173.364
2009-12-27 22:30:00	NA	NA	9	NA	NA	9	910.546	0.297225	0	NA	NA	9	NA	NA	9	2.97322	0.0312379	0	NA	NA	9	NA	NA	9	3.82665	0.00433326	0	NA	NA	9	42.6717	0.0407753	0	NA	NA	9	0.0634487	0.0401955	0	NA	NA	9	0.00828531	0.0277343	0	0.0704176	0.0389888	0	96.7571
2009-12-27 23:30:00	NA	NA	9	NA	NA	9	910.672	0.303422	0	NA	NA	9	NA	NA	9	2.89904	0.0193036	0	NA	NA	9	NA	NA	9	3.82172	0.00324927	0	NA	NA	9	42.7078	0.0433455	0	NA	NA	9	0.0492735	0.0378109	0	NA	NA	9	0.0103112	0.0180353	0	0.0529455	0.0385456	0	86.9889
2009-12-28 00:30:00	NA	NA	9	NA	NA	9	910.858	0.335219	0	NA	NA	9	NA	NA	9	2.84438	0.0254227	0	NA	NA	9	NA	NA	9	3.818	0.00423107	0	NA	NA	9	42.7332	0.0438923	0	NA	NA	9	0.0234612	0.00812652	0	NA	NA	9	-0.00810016	0.00558873	0	0.0257432	0.0071117	0	110.723
2009-12-28 01:30:00	NA	NA	9	NA	NA	9	911.304	0.333862	0	NA	NA	9	NA	NA	9	2.81749	0.0270178	0	NA	NA	9	NA	NA	9	3.81629	0.00406349	0	NA	NA	9	42.7469	0.0396912	0	NA	NA	9	0.00409778	0.0116902	0	NA	NA	9	-0.0035222	0.00602519	0	0.012346	0.0070476	0	148.268
2009-12-28 02:30:00	NA	NA	9	NA	NA	9	911.646	0.297152	0	NA	NA	9	NA	NA	9	2.84537	0.0182039	0	NA	NA	9	NA	NA	9	3.8176	0.00333054	0	NA	NA	9	42.7264	0.0428528	0	NA	NA	9	0.0156537	0.0129734	0	NA	NA	9	-0.0309902	0.00922047	0	0.0370264	0.00936542	0	153.811
2009-12-28 03:30:00	NA	NA	9	NA	NA	9	911.92	0.359725	0	NA	NA	9	NA	NA	9	2.88282	0.0180176	0	NA	NA	9	NA	NA	9	3.8222	0.00380894	0	NA	NA	9	42.7344	0.0482025	0	NA	NA	9	-0.00598927	0.00707725	0	NA	NA	9	-0.031578	0.0103157	0	0.0330355	0.00990785	0	192.307
2009-12-28 04:30:00	NA	NA	9	NA	NA	9	912.131	0.317854	0	NA	NA	9	NA	NA	9	2.93198	0.0243989	0	NA	NA	9	NA	NA	9	3.82649	0.0039373	0	NA	NA	9	42.7231	0.0394296	0	NA	NA	9	0.000535179	0.00619318	0	NA	NA	9	-0.0175282	0.00894552	0	0.0188626	0.00837116	0	170.705
2009-12-28 05:30:00	NA	NA	9	NA	NA	9	912.061	0.326152	0	NA	NA	9	NA	NA	9	2.95273	0.0348678	0	NA	NA	9	NA	NA	9	3.82769	0.00436495	0	NA	NA	9	42.7108	0.0462959	0	NA	NA	9	0.0144991	0.00462764	0	NA	NA	9	-0.00833971	0.00511799	0	0.0177375	0.00357013	0	120.963
2009-12-28 06:30:00	NA	NA	9	NA	NA	9	912.229	0.302153	0	NA	NA	9	NA	NA	9	2.89615	0.0241132	0	NA	NA	9	NA	NA	9	3.82366	0.00429282	0	NA	NA	9	42.7349	0.0468046	0	NA	NA	9	0.00407669	0.0251606	0	NA	NA	9	-0.00939665	0.00887859	0	0.0222421	0.0179409	0	148.581
2009-12-28 07:30:00	NA	NA	9	NA	NA	9	912.334	0.322729	0	NA	NA	9	NA	NA	9	2.80563	0.0137615	0	NA	NA	9	NA	NA	9	3.81419	0.00297374	0	NA	NA	9	42.7356	0.0384307	0	NA	NA	9	-0.088564	0.0414539	0	NA	NA	9	-0.00702871	0.0200186	0	0.0915794	0.0403125	0	262.107
2009-12-28 08:30:00	NA	NA	9	NA	NA	9	912.12	0.318036	0	NA	NA	9	NA	NA	9	2.83831	0.0293402	0	NA	NA	9	NA	NA	9	3.81667	0.00374033	0	NA	NA	9	42.7237	0.0424557	0	NA	NA	9	-0.112052	0.0376657	0	NA	NA	9	-0.00723774	0.0228604	0	0.114753	0.0371571	0	265.554
2009-12-28 09:30:00	NA	NA	9	NA	NA	9	911.522	0.450957	0	NA	NA	9	NA	NA	9	2.87373	0.0293823	0	NA	NA	9	NA	NA	9	3.81795	0.00369198	0	NA	NA	9	42.6934	0.0506038	0	NA	NA	9	-0.0903175	0.0489359	0	NA	NA	9	0.0369549	0.0408696	0	0.106816	0.0466608	0	281.526
2009-12-28 10:30:00	NA	NA	9	NA	NA	9	911.473	0.33852	0	NA	NA	9	NA	NA	9	2.95612	0.0174871	0	NA	NA	9	NA	NA	9	3.82185	0.0032743	0	NA	NA	9	42.6337	0.0438726	0	NA	NA	9	-0.0798796	0.0264875	0	NA	NA	9	0.0441526	0.0255213	0	0.093029	0.032071	0	297.051
2009-12-28 11:30:00	NA	NA	9	NA	NA	9	911.478	0.318387	0	NA	NA	9	NA	NA	9	2.96081	0.0188764	0	NA	NA	9	NA	NA	9	3.82335	0.00330777	0	NA	NA	9	42.6462	0.0389239	0	NA	NA	9	-0.0261383	0.0158288	0	NA	NA	9	0.0119127	0.0137089	0	0.0313984	0.0166632	0	288.743
2009-12-28 12:30:00	NA	NA	9	NA	NA	9	911.628	0.350853	0	NA	NA	9	NA	NA	9	3.01001	0.0186137	0	NA	NA	9	NA	NA	9	3.82739	0.00365711	0	NA	NA	9	42.6319	0.0445587	0	NA	NA	9	-0.0175212	0.0138087	0	NA	NA	9	0.0164886	0.0132371	0	0.0287602	0.0108389	0	280.311
2009-12-28 13:30:00	NA	NA	9	NA	NA	9	912.114	0.344695	0	NA	NA	9	NA	NA	9	2.96574	0.039989	0	NA	NA	9	NA	NA	9	3.82387	0.00393929	0	NA	NA	9	42.6458	0.0491111	0	NA	NA	9	0.0589687	0.0216149	0	NA	NA	9	0.0121356	0.0196128	0	0.0629169	0.0227535	0	78.7622
2009-12-28 14:30:00	NA	NA	9	NA	NA	9	912.703	0.36213	0	NA	NA	9	NA	NA	9	2.87066	0.0145931	0	NA	NA	9	NA	NA	9	3.81878	0.00298634	0	NA	NA	9	42.7071	0.0392391	0	NA	NA	9	0.0246376	0.0342809	0	NA	NA	9	0.0325542	0.0137916	0	0.0520781	0.0178734	0	126.024
2009-12-28 15:30:00	NA	NA	9	NA	NA	9	912.857	0.335984	0	NA	NA	9	NA	NA	9	2.89108	0.0180203	0	NA	NA	9	NA	NA	9	3.82042	0.00327071	0	NA	NA	9	42.7005	0.0420096	0	NA	NA	9	-0.0216658	0.0069734	0	NA	NA	9	0.00671954	0.00682391	0	0.0236051	0.00724783	0	284.688
2009-12-28 16:30:00	NA	NA	9	NA	NA	9	913.025	0.326371	0	NA	NA	9	NA	NA	9	2.88248	0.0113247	0	NA	NA	9	NA	NA	9	3.81935	0.00333275	0	NA	NA	9	42.6984	0.0459982	0	NA	NA	9	-0.0233706	0.00801717	0	NA	NA	9	0.00999469	0.00498985	0	0.0258611	0.00815135	0	293.764
2009-12-28 17:30:00	NA	NA	9	NA	NA	9	912.872	0.324184	0	NA	NA	9	NA	NA	9	2.95903	0.0522518	0	NA	NA	9	NA	NA	9	3.82366	0.00510493	0	NA	NA	9	42.6515	0.0528517	0	NA	NA	9	-0.0326552	0.0137657	0	NA	NA	9	0.0161473	0.0198007	0	0.0399749	0.0176214	0	293.008
2009-12-28 18:30:00	NA	NA	9	NA	NA	9	912.605	0.331974	0	NA	NA	9	NA	NA	9	2.96134	0.0270576	0	NA	NA	9	NA	NA	9	3.82334	0.00368515	0	NA	NA	9	42.6447	0.0437186	0	NA	NA	9	-0.026189	0.0158177	0	NA	NA	9	0.0218044	0.0171753	0	0.0363761	0.0195749	0	294.971
2009-12-28 19:30:00	NA	NA	9	NA	NA	9	911.931	0.36312	0	NA	NA	9	NA	NA	9	2.99143	0.0180189	0	NA	NA	9	NA	NA	9	3.8264	0.00324482	0	NA	NA	9	42.6438	0.0416932	0	NA	NA	9	-0.0206762	0.01055	0	NA	NA	9	0.0181849	0.010652	0	0.0302216	0.00833849	0	291.209
2009-12-28 20:30:00	NA	NA	9	NA	NA	9	911.247	0.397203	0	NA	NA	9	NA	NA	9	3.00173	0.0144326	0	NA	NA	9	NA	NA	9	3.82727	0.00363672	0	NA	NA	9	42.6414	0.045196	0	NA	NA	9	-0.0223138	0.00999874	0	NA	NA	9	0.011725	0.0114553	0	0.027758	0.009798	0	285.428
2009-12-28 21:30:00	NA	NA	9	NA	NA	9	910.636	0.368862	0	NA	NA	9	NA	NA	9	3.01843	0.0164866	0	NA	NA	9	NA	NA	9	3.82976	0.00362986	0	NA	NA	9	42.6511	0.0444759	0	NA	NA	9	-0.0170129	0.0157095	0	NA	NA	9	0.00372138	0.0108105	0	0.0229514	0.0118344	0	254.582
2009-12-28 22:30:00	NA	NA	9	NA	NA	9	909.969	0.330352	0	NA	NA	9	NA	NA	9	3.06321	0.0361536	0	NA	NA	9	NA	NA	9	3.83168	0.00497699	0	NA	NA	9	42.6166	0.0537142	0	NA	NA	9	-0.0169465	0.0197007	0	NA	NA	9	0.0135539	0.00993069	0	0.029128	0.0104393	0	271.618
2009-12-28 23:30:00	NA	NA	9	NA	NA	9	910.22	0.317447	0	NA	NA	9	NA	NA	9	2.86864	0.0136926	0	NA	NA	9	NA	NA	9	3.81869	0.00363298	0	NA	NA	9	42.7102	0.0478435	0	NA	NA	9	0.0158458	0.0262748	0	NA	NA	9	0.0361142	0.0235546	0	0.0459219	0.026294	0	83.1208
2009-12-29 00:30:00	NA	NA	9	NA	NA	9	910.133	0.303396	0	NA	NA	9	NA	NA	9	2.89591	0.0331562	0	NA	NA	9	NA	NA	9	3.82085	0.00388417	0	NA	NA	9	42.7014	0.0473751	0	NA	NA	9	-0.015327	0.0230854	0	NA	NA	9	0.0204897	0.0134	0	0.0355787	0.0100529	0	241.589
2009-12-29 01:30:00	NA	NA	9	NA	NA	9	910.353	0.290548	0	NA	NA	9	NA	NA	9	2.89293	0.0139106	0	NA	NA	9	NA	NA	9	3.82044	0.00356085	0	NA	NA	9	42.6999	0.0436938	0	NA	NA	9	-0.0225803	0.0259147	0	NA	NA	9	0.00570268	0.0217524	0	0.0388518	0.0133092	0	221.751
2009-12-29 02:30:00	NA	NA	9	NA	NA	9	910.66	0.343392	0	NA	NA	9	NA	NA	9	2.92096	0.0147206	0	NA	NA	9	NA	NA	9	3.82222	0.00315359	0	NA	NA	9	42.6851	0.0414851	0	NA	NA	9	-0.0246772	0.00712993	0	NA	NA	9	0.0205558	0.0111871	0	0.0341553	0.00638969	0	308.457
2009-12-29 03:30:00	NA	NA	9	NA	NA	9	911.094	0.322313	0	NA	NA	9	NA	NA	9	2.95199	0.00999933	0	NA	NA	9	NA	NA	9	3.82675	0.00333567	0	NA	NA	9	42.7006	0.0436985	0	NA	NA	9	-0.00356632	0.00425614	0	NA	NA	9	0.0188113	0.00703974	0	0.0196176	0.00702825	0	290.537
2009-12-29 04:30:00	NA	NA	9	NA	NA	9	911.549	0.361716	0	NA	NA	9	NA	NA	9	2.94169	0.0189545	0	NA	NA	9	NA	NA	9	3.82525	0.00358973	0	NA	NA	9	42.6951	0.0447551	0	NA	NA	9	0.000389895	0.0170228	0	NA	NA	9	0.0144195	0.00571791	0	0.0215278	0.00818262	0	225.449
2009-12-29 05:30:00	NA	NA	9	NA	NA	9	912.274	0.333247	0	NA	NA	9	NA	NA	9	2.81979	0.0372373	0	NA	NA	9	NA	NA	9	3.81564	0.00446901	0	NA	NA	9	42.7352	0.0482866	0	NA	NA	9	0.036514	0.0275334	0	NA	NA	9	0.0228384	0.0179792	0	0.0531903	0.0103178	0	98.7639
2009-12-29 06:30:00	NA	NA	9	NA	NA	9	912.308	0.301252	0	NA	NA	9	NA	NA	9	2.82741	0.037348	0	NA	NA	9	NA	NA	9	3.81554	0.00385866	0	NA	NA	9	42.7238	0.0486881	0	NA	NA	9	-0.0380726	0.0128618	0	NA	NA	9	0.0289083	0.0154665	0	0.0490985	0.016707	0	305.591
2009-12-29 07:30:00	NA	NA	9	NA	NA	9	912.234	0.315036	0	NA	NA	9	NA	NA	9	2.88004	0.0268382	0	NA	NA	9	NA	NA	9	3.81866	0.0033585	0	NA	NA	9	42.6935	0.0486833	0	NA	NA	9	-0.0448931	0.0196567	0	NA	NA	9	0.0378195	0.0177601	0	0.0609482	0.020801	0	305.336
2009-12-29 08:30:00	NA	NA	9	NA	NA	9	912.122	0.332721	0	NA	NA	9	NA	NA	9	2.81954	0.0117749	0	NA	NA	9	NA	NA	9	3.81576	0.00326074	0	NA	NA	9	42.737	0.0447433	0	NA	NA	9	0.0063467	0.0333182	0	NA	NA	9	0.0167316	0.00981273	0	0.0359316	0.0153296	0	170.787
2009-12-29 09:30:00	NA	NA	9	NA	NA	9	911.696	0.312653	0	NA	NA	9	NA	NA	9	2.88488	0.0491595	0	NA	NA	9	NA	NA	9	3.82118	0.00522049	0	NA	NA	9	42.719	0.0501667	0	NA	NA	9	-0.0264441	0.00908093	0	NA	NA	9	0.0115989	0.00783209	0	0.0296426	0.00994589	0	294.117
2009-12-29 10:30:00	NA	NA	9	NA	NA	9	911.341	0.310487	0	NA	NA	9	NA	NA	9	3.02591	0.0349613	0	NA	NA	9	NA	NA	9	3.83014	0.00394537	0	NA	NA	9	42.6455	0.0485808	0	NA	NA	9	-0.0155213	0.00542448	0	NA	NA	9	0.0326179	0.0151084	0	0.0368775	0.014232	0	331.124
2009-12-29 11:30:00	NA	NA	9	NA	NA	9	911.181	0.309594	0	NA	NA	9	NA	NA	9	3.07067	0.0344302	0	NA	NA	9	NA	NA	9	3.83319	0.00361962	0	NA	NA	9	42.6249	0.0488446	0	NA	NA	9	-0.0180224	0.00919113	0	NA	NA	9	0.0218668	0.0222457	0	0.034967	0.0126249	0	304.747
2009-12-29 12:30:00	NA	NA	9	NA	NA	9	911.454	0.369675	0	NA	NA	9	NA	NA	9	2.98006	0.0711925	0	NA	NA	9	NA	NA	9	3.82545	0.00717238	0	NA	NA	9	42.6471	0.0469965	0	NA	NA	9	-0.0382545	0.03073	0	NA	NA	9	0.0426617	0.0444039	0	0.0632934	0.0468296	0	280.028
2009-12-29 13:30:00	NA	NA	9	NA	NA	9	911.908	0.344107	0	NA	NA	9	NA	NA	9	2.91844	0.0251434	0	NA	NA	9	NA	NA	9	3.82245	0.00351528	0	NA	NA	9	42.6905	0.0483991	0	NA	NA	9	-0.010373	0.0277349	0	NA	NA	9	0.00953275	0.0365187	0	0.0383701	0.0287809	0	204.278
2009-12-29 14:30:00	NA	NA	9	NA	NA	9	912.277	0.364336	0	NA	NA	9	NA	NA	9	2.92802	0.0307509	0	NA	NA	9	NA	NA	9	3.82338	0.00358397	0	NA	NA	9	42.6893	0.0529477	0	NA	NA	9	-0.028137	0.0180009	0	NA	NA	9	0.00467248	0.0160936	0	0.0323361	0.0187297	0	277.621
2009-12-29 15:30:00	NA	NA	9	NA	NA	9	912.585	0.323624	0	NA	NA	9	NA	NA	9	2.98923	0.0194782	0	NA	NA	9	NA	NA	9	3.82616	0.00366519	0	NA	NA	9	42.6433	0.0487333	0	NA	NA	9	-0.0337317	0.0296667	0	NA	NA	9	0.0209468	0.0164456	0	0.0424161	0.0304617	0	300.883
2009-12-29 16:30:00	NA	NA	9	NA	NA	9	913.209	0.404873	0	NA	NA	9	NA	NA	9	2.84762	0.0885083	0	NA	NA	9	NA	NA	9	3.81453	0.00676155	0	NA	NA	9	42.6839	0.0519952	0	NA	NA	9	-0.0679095	0.0261023	0	NA	NA	9	0.0588781	0.0368336	0	0.0941183	0.0354639	0	307.299
2009-12-29 17:30:00	NA	NA	9	NA	NA	9	913.287	0.33364	0	NA	NA	9	NA	NA	9	2.88182	0.0676031	0	NA	NA	9	NA	NA	9	3.81881	0.00669236	0	NA	NA	9	42.6923	0.0492639	0	NA	NA	9	-0.0510057	0.027218	0	NA	NA	9	0.0663356	0.0236687	0	0.0866709	0.0281229	0	319.993
2009-12-29 18:30:00	NA	NA	9	NA	NA	9	913.02	0.327683	0	NA	NA	9	NA	NA	9	2.96837	0.0162616	0	NA	NA	9	NA	NA	9	3.8258	0.0033737	0	NA	NA	9	42.666	0.0401937	0	NA	NA	9	-0.0623142	0.0236813	0	NA	NA	9	-0.00116781	0.0373412	0	0.0723249	0.0246568	0	273.425
2009-12-29 19:30:00	NA	NA	9	NA	NA	9	912.35	0.412493	0	NA	NA	9	NA	NA	9	3.06494	0.0350985	0	NA	NA	9	NA	NA	9	3.83416	0.00395003	0	NA	NA	9	42.6437	0.0460167	0	NA	NA	9	-0.00703777	0.0305081	0	NA	NA	9	-0.00619665	0.0132887	0	0.0310362	0.0152161	0	196.459
2009-12-29 20:30:00	NA	NA	9	NA	NA	9	911.896	0.373044	0	NA	NA	9	NA	NA	9	2.98468	0.029037	0	NA	NA	9	NA	NA	9	3.82711	0.00376853	0	NA	NA	9	42.6615	0.0480044	0	NA	NA	9	0.0215054	0.0323088	0	NA	NA	9	0.00501793	0.0153014	0	0.032896	0.0261377	0	168.138
2009-12-29 21:30:00	NA	NA	9	NA	NA	9	911.311	0.357857	0	NA	NA	9	NA	NA	9	2.92206	0.013309	0	NA	NA	9	NA	NA	9	3.82371	0.00325936	0	NA	NA	9	42.7019	0.0427795	0	NA	NA	9	0.0323619	0.0390114	0	NA	NA	9	-0.0158975	0.0115439	0	0.0505224	0.0200491	0	144.118
2009-12-29 22:30:00	NA	NA	9	NA	NA	9	910.577	0.43325	0	NA	NA	9	NA	NA	9	2.92922	0.00934525	0	NA	NA	9	NA	NA	9	3.82532	0.00350584	0	NA	NA	9	42.7131	0.0462356	0	NA	NA	9	-0.0102466	0.0235914	0	NA	NA	9	0.00608753	0.0148109	0	0.02542	0.0164775	0	202.611
2009-12-29 23:30:00	NA	NA	9	NA	NA	9	910.001	0.33026	0	NA	NA	9	NA	NA	9	2.94296	0.0180006	0	NA	NA	9	NA	NA	9	3.82577	0.00357358	0	NA	NA	9	42.7009	0.0443851	0	NA	NA	9	-0.0341473	0.0114608	0	NA	NA	9	0.0293177	0.00980247	0	0.0461221	0.0112118	0	310.618
2009-12-30 00:30:00	NA	NA	9	NA	NA	9	909.58	0.342794	0	NA	NA	9	NA	NA	9	3.00036	0.0223453	0	NA	NA	9	NA	NA	9	3.8304	0.00359337	0	NA	NA	9	42.6835	0.0433214	0	NA	NA	9	-0.00978826	0.0160573	0	NA	NA	9	0.0229742	0.0181058	0	0.0325546	0.012216	0	222.465
2009-12-30 01:30:00	NA	NA	9	NA	NA	9	909.532	0.303059	0	NA	NA	9	NA	NA	9	3.01961	0.0199601	0	NA	NA	9	NA	NA	9	3.83097	0.00340761	0	NA	NA	9	42.6653	0.0417099	0	NA	NA	9	-0.018312	0.009575	0	NA	NA	9	0.0181314	0.0111557	0	0.0289151	0.00663561	0	267.906
2009-12-30 02:30:00	NA	NA	9	NA	NA	9	910.177	0.429087	0	NA	NA	9	NA	NA	9	2.93562	0.0845657	0	NA	NA	9	NA	NA	9	3.82357	0.00790601	0	NA	NA	9	42.683	0.0502113	0	NA	NA	9	0.069741	0.0347346	0	NA	NA	9	0.0153584	0.0212123	0	0.0758077	0.0317644	0	72.474
2009-12-30 03:30:00	NA	NA	9	NA	NA	9	910.811	0.318367	0	NA	NA	9	NA	NA	9	2.84831	0.0147136	0	NA	NA	9	NA	NA	9	3.81752	0.00329313	0	NA	NA	9	42.7219	0.0434462	0	NA	NA	9	-0.00201124	0.0347304	0	NA	NA	9	0.0115506	0.0164086	0	0.0362516	0.0172647	0	190.532
2009-12-30 04:30:00	NA	NA	9	NA	NA	9	911.419	0.322674	0	NA	NA	9	NA	NA	9	2.84631	0.00917777	0	NA	NA	9	NA	NA	9	3.8179	0.00314783	0	NA	NA	9	42.729	0.0405571	0	NA	NA	9	-0.0234974	0.0115001	0	NA	NA	9	0.00303616	0.010859	0	0.025956	0.0117362	0	282.666
2009-12-30 05:30:00	NA	NA	9	NA	NA	9	911.831	0.332762	0	NA	NA	9	NA	NA	9	2.89061	0.030055	0	NA	NA	9	NA	NA	9	3.82009	0.00382431	0	NA	NA	9	42.6978	0.0414222	0	NA	NA	9	-0.0828083	0.0378457	0	NA	NA	9	0.0846218	0.0487444	0	0.122274	0.0536184	0	311.516
2009-12-30 06:30:00	NA	NA	9	NA	NA	9	912.153	0.317323	0	NA	NA	9	NA	NA	9	2.94917	0.0309967	0	NA	NA	9	NA	NA	9	3.8257	0.00409187	0	NA	NA	9	42.6906	0.0451452	0	NA	NA	9	-0.13551	0.0526415	0	NA	NA	9	0.0866598	0.0385397	0	0.164732	0.054697	0	302.951
2009-12-30 07:30:00	NA	NA	9	NA	NA	9	912.193	0.302157	0	NA	NA	9	NA	NA	9	2.97569	0.0232388	0	NA	NA	9	NA	NA	9	3.82669	0.00299423	0	NA	NA	9	42.6679	0.0362734	0	NA	NA	9	-0.0984505	0.0316595	0	NA	NA	9	0.0761374	0.0327526	0	0.127184	0.0372598	0	306.995
2009-12-30 08:30:00	NA	NA	9	NA	NA	9	912.142	0.332379	0	NA	NA	9	NA	NA	9	2.99572	0.0179193	0	NA	NA	9	NA	NA	9	3.82868	0.00336673	0	NA	NA	9	42.6665	0.038072	0	NA	NA	9	-0.060085	0.0381776	0	NA	NA	9	0.02536	0.0263905	0	0.0686778	0.0411149	0	287.867
2009-12-30 09:30:00	NA	NA	9	NA	NA	9	911.82	0.357501	0	NA	NA	9	NA	NA	9	3.02145	0.0196115	0	NA	NA	9	NA	NA	9	3.83269	0.00370959	0	NA	NA	9	42.6829	0.0444339	0	NA	NA	9	-0.0239354	0.0177201	0	NA	NA	9	-0.00184387	0.0134602	0	0.0273108	0.0180419	0	271.093
2009-12-30 10:30:00	NA	NA	9	NA	NA	9	911.491	0.337112	0	NA	NA	9	NA	NA	9	3.04286	0.016042	0	NA	NA	9	NA	NA	9	3.83459	0.00362705	0	NA	NA	9	42.6786	0.044379	0	NA	NA	9	-0.00359183	0.00777944	0	NA	NA	9	0.013582	0.0129032	0	0.0169747	0.0116701	0	228.044
2009-12-30 11:30:00	NA	NA	9	NA	NA	9	911.319	0.348682	0	NA	NA	9	NA	NA	9	3.02246	0.00911745	0	NA	NA	9	NA	NA	9	3.83311	0.00340998	0	NA	NA	9	42.6871	0.0446183	0	NA	NA	9	0.0180632	0.00911698	0	NA	NA	9	0.0480084	0.00793108	0	0.051814	0.0096118	0	33.9085
2009-12-30 12:30:00	NA	NA	9	NA	NA	9	911.303	0.370208	0	NA	NA	9	NA	NA	9	2.97752	0.0836328	0	NA	NA	9	NA	NA	9	3.82933	0.0073668	0	NA	NA	9	42.6992	0.0576927	0	NA	NA	9	0.0390941	0.0402207	0	NA	NA	9	0.0381469	0.0109563	0	0.0626035	0.0283118	0	69.4987
2009-12-30 13:30:00	NA	NA	9	NA	NA	9	911.624	0.320804	0	NA	NA	9	NA	NA	9	2.87795	0.0191553	0	NA	NA	9	NA	NA	9	3.82259	0.00357826	0	NA	NA	9	42.7459	0.0456414	0	NA	NA	9	0.0103479	0.020499	0	NA	NA	9	0.0200293	0.0172146	0	0.0285345	0.0202587	0	144.176
2009-12-30 14:30:00	NA	NA	9	NA	NA	9	912.118	0.344421	0	NA	NA	9	NA	NA	9	2.85861	0.0120802	0	NA	NA	9	NA	NA	9	3.82239	0.00352421	0	NA	NA	9	42.7686	0.0478971	0	NA	NA	9	-0.0142447	0.0147005	0	NA	NA	9	-0.00386964	0.00487445	0	0.0195113	0.00877316	0	221.615
2009-12-30 15:30:00	NA	NA	9	NA	NA	9	912.289	0.329696	0	NA	NA	9	NA	NA	9	2.88994	0.0232311	0	NA	NA	9	NA	NA	9	3.82337	0.0035086	0	NA	NA	9	42.7395	0.0502814	0	NA	NA	9	-0.0169491	0.00289492	0	NA	NA	9	0.00975192	0.00327238	0	0.0198567	0.00267682	0	299.838
2009-12-30 16:30:00	NA	NA	9	NA	NA	9	912.756	0.351548	0	NA	NA	9	NA	NA	9	2.91362	0.0163711	0	NA	NA	9	NA	NA	9	3.82413	0.00347699	0	NA	NA	9	42.7174	0.0439104	0	NA	NA	9	-0.0290293	0.00751826	0	NA	NA	9	0.0174921	0.00505572	0	0.0341197	0.00816049	0	301.126
2009-12-30 17:30:00	NA	NA	9	NA	NA	9	913.073	0.335518	0	NA	NA	9	NA	NA	9	2.96109	0.0205059	0	NA	NA	9	NA	NA	9	3.82877	0.00375791	0	NA	NA	9	42.7127	0.0452131	0	NA	NA	9	-0.0268603	0.0120203	0	NA	NA	9	0.0102057	0.00959206	0	0.0301396	0.0123971	0	287.049
2009-12-30 18:30:00	NA	NA	9	NA	NA	9	913.317	0.331459	0	NA	NA	9	NA	NA	9	2.91591	0.0497761	0	NA	NA	9	NA	NA	9	3.82338	0.00596089	0	NA	NA	9	42.7046	0.0440956	0	NA	NA	9	-0.0608426	0.0316286	0	NA	NA	9	0.0426797	0.0307596	0	0.0756334	0.0418258	0	303.386
2009-12-30 19:30:00	NA	NA	9	NA	NA	9	913.205	0.350295	0	NA	NA	9	NA	NA	9	2.90791	0.0326889	0	NA	NA	9	NA	NA	9	3.82224	0.00374313	0	NA	NA	9	42.701	0.0391575	0	NA	NA	9	-0.0877674	0.0303113	0	NA	NA	9	0.0670403	0.0305967	0	0.112703	0.0367437	0	306.617
2009-12-30 20:30:00	NA	NA	9	NA	NA	9	912.636	0.415058	0	NA	NA	9	NA	NA	9	2.93976	0.0343339	0	NA	NA	9	NA	NA	9	3.82448	0.0040447	0	NA	NA	9	42.6873	0.0407125	0	NA	NA	9	-0.061453	0.0276909	0	NA	NA	9	0.0335143	0.0219514	0	0.0723416	0.0302463	0	295.623
2009-12-30 21:30:00	NA	NA	9	NA	NA	9	911.664	0.439242	0	NA	NA	9	NA	NA	9	3.02987	0.0312583	0	NA	NA	9	NA	NA	9	3.8317	0.00385103	0	NA	NA	9	42.6596	0.0473801	0	NA	NA	9	-0.0410077	0.0107834	0	NA	NA	9	0.0293742	0.0135636	0	0.051321	0.0145201	0	304.309
2009-12-30 22:30:00	NA	NA	9	NA	NA	9	910.801	0.357144	0	NA	NA	9	NA	NA	9	3.02453	0.0294267	0	NA	NA	9	NA	NA	9	3.8329	0.00435894	0	NA	NA	9	42.6821	0.0506408	0	NA	NA	9	-0.00623249	0.0186765	0	NA	NA	9	0.0279406	0.0203058	0	0.0368479	0.0149195	0	225.828
2009-12-30 23:30:00	NA	NA	9	NA	NA	9	910.043	0.384713	0	NA	NA	9	NA	NA	9	3.01383	0.0135792	0	NA	NA	9	NA	NA	9	3.83322	0.00341835	0	NA	NA	9	42.7007	0.0434368	0	NA	NA	9	-0.00810987	0.0124418	0	NA	NA	9	0.0162062	0.0182626	0	0.0248635	0.0140847	0	235.735
2009-12-31 00:30:00	NA	NA	9	NA	NA	9	909.439	0.300285	0	NA	NA	9	NA	NA	9	3.02309	0.0126619	0	NA	NA	9	NA	NA	9	3.83292	0.00326919	0	NA	NA	9	42.6851	0.0456985	0	NA	NA	9	-0.0246648	0.0126483	0	NA	NA	9	-0.001227	0.00651942	0	0.0257639	0.0121873	0	266.869
2009-12-31 01:30:00	NA	NA	9	NA	NA	9	909.525	0.391354	0	NA	NA	9	NA	NA	9	2.89993	0.0911251	0	NA	NA	9	NA	NA	9	3.82236	0.00880526	0	NA	NA	9	42.7152	0.0496776	0	NA	NA	9	-0.056801	0.0273941	0	NA	NA	9	0.0472844	0.0392318	0	0.0777965	0.0412204	0	301.058
2009-12-31 02:30:00	NA	NA	9	NA	NA	9	909.836	0.308809	0	NA	NA	9	NA	NA	9	2.83406	0.0170926	0	NA	NA	9	NA	NA	9	3.81556	0.00318292	0	NA	NA	9	42.7168	0.0385944	0	NA	NA	9	-0.0922483	0.0287824	0	NA	NA	9	0.0721026	0.0267524	0	0.118831	0.0336384	0	307.869
2009-12-31 03:30:00	NA	NA	9	NA	NA	9	910.187	0.343889	0	NA	NA	9	NA	NA	9	2.87559	0.0132568	0	NA	NA	9	NA	NA	9	3.81987	0.00345765	0	NA	NA	9	42.7158	0.0425664	0	NA	NA	9	-0.068089	0.0390442	0	NA	NA	9	0.0386392	0.0320371	0	0.0813264	0.0454498	0	294.219
2009-12-31 04:30:00	NA	NA	9	NA	NA	9	910.79	0.380999	0	NA	NA	9	NA	NA	9	2.91483	0.0184284	0	NA	NA	9	NA	NA	9	3.82359	0.00292178	0	NA	NA	9	42.7102	0.0407302	0	NA	NA	9	-0.0428862	0.0222816	0	NA	NA	9	0.0188345	0.022173	0	0.0500825	0.0259545	0	290.859
2009-12-31 05:30:00	NA	NA	9	NA	NA	9	911.331	0.358687	0	NA	NA	9	NA	NA	9	2.95054	0.0167475	0	NA	NA	9	NA	NA	9	3.82442	0.00278156	0	NA	NA	9	42.6731	0.0377162	0	NA	NA	9	-0.0721661	0.0222711	0	NA	NA	9	0.0520982	0.0211472	0	0.090599	0.0256329	0	305.524
2009-12-31 06:30:00	NA	NA	9	NA	NA	9	911.906	0.32362	0	NA	NA	9	NA	NA	9	2.97637	0.0149263	0	NA	NA	9	NA	NA	9	3.82744	0.00325573	0	NA	NA	9	42.6765	0.0387118	0	NA	NA	9	-0.0692796	0.0294182	0	NA	NA	9	0.0405891	0.0291725	0	0.0832904	0.035015	0	295.415
2009-12-31 07:30:00	NA	NA	9	NA	NA	9	912.197	0.34018	0	NA	NA	9	NA	NA	9	3.03271	0.0186863	0	NA	NA	9	NA	NA	9	3.83259	0.00319401	0	NA	NA	9	42.6666	0.0372058	0	NA	NA	9	-0.0359681	0.0244495	0	NA	NA	9	0.00977422	0.0194874	0	0.0418	0.0248866	0	276.393
2009-12-31 08:30:00	NA	NA	9	NA	NA	9	912.287	0.311452	0	NA	NA	9	NA	NA	9	3.06131	0.0136833	0	NA	NA	9	NA	NA	9	3.83463	0.00331175	0	NA	NA	9	42.6544	0.0426197	0	NA	NA	9	-0.0366518	0.0256056	0	NA	NA	9	0.00515675	0.0172809	0	0.0415796	0.024396	0	276.38
2009-12-31 09:30:00	NA	NA	9	NA	NA	9	912.028	0.323706	0	NA	NA	9	NA	NA	9	3.06459	0.00963761	0	NA	NA	9	NA	NA	9	3.83487	0.00309453	0	NA	NA	9	42.6532	0.0390811	0	NA	NA	9	-0.0611212	0.020119	0	NA	NA	9	0.0323976	0.0148468	0	0.0703046	0.0216284	0	297.382
2009-12-31 10:30:00	NA	NA	9	NA	NA	9	911.677	0.341486	0	NA	NA	9	NA	NA	9	3.1028	0.0171039	0	NA	NA	9	NA	NA	9	3.83587	0.00294834	0	NA	NA	9	42.6157	0.0419671	0	NA	NA	9	-0.097335	0.0350941	0	NA	NA	9	0.052761	0.0240244	0	0.112003	0.0390101	0	298.156
2009-12-31 11:30:00	NA	NA	9	NA	NA	9	911.298	0.327316	0	NA	NA	9	NA	NA	9	3.13065	0.0279275	0	NA	NA	9	NA	NA	9	3.83747	0.00337408	0	NA	NA	9	42.5994	0.0418117	0	NA	NA	9	-0.0992448	0.025851	0	NA	NA	9	0.0765015	0.0239346	0	0.126787	0.0294632	0	307.517
2009-12-31 12:30:00	NA	NA	9	NA	NA	9	910.96	0.30942	0	NA	NA	9	NA	NA	9	3.16964	0.0175512	0	NA	NA	9	NA	NA	9	3.84384	0.00316669	0	NA	NA	9	42.6277	0.037746	0	NA	NA	9	-0.090926	0.0294368	0	NA	NA	9	0.0241114	0.0247014	0	0.096412	0.0320947	0	282.718
2009-12-31 13:30:00	NA	NA	9	NA	NA	9	910.966	0.328513	0	NA	NA	9	NA	NA	9	3.14883	0.0258781	0	NA	NA	9	NA	NA	9	3.8429	0.00340412	0	NA	NA	9	42.6434	0.043352	0	NA	NA	9	-0.0729989	0.0233176	0	NA	NA	9	-0.0101275	0.0187138	0	0.0759723	0.0235232	0	261.921
2009-12-31 14:30:00	NA	NA	9	NA	NA	9	911.239	0.320534	0	NA	NA	9	NA	NA	9	3.10513	0.0123361	0	NA	NA	9	NA	NA	9	3.84089	0.00296657	0	NA	NA	9	42.6756	0.0408042	0	NA	NA	9	-0.101803	0.017505	0	NA	NA	9	-0.0386879	0.0126441	0	0.109526	0.0181921	0	249.179
2009-12-31 15:30:00	NA	NA	9	NA	NA	9	911.63	0.320281	0	NA	NA	9	NA	NA	9	3.13412	0.0165977	0	NA	NA	9	NA	NA	9	3.84337	0.00331189	0	NA	NA	9	42.6681	0.0402169	0	NA	NA	9	-0.0312323	0.0220991	0	NA	NA	9	-0.0297523	0.021477	0	0.0459457	0.0264411	0	227.825
2009-12-31 16:30:00	NA	NA	9	NA	NA	9	912.345	0.420696	0	NA	NA	9	NA	NA	9	3.03226	0.0733455	0	NA	NA	9	NA	NA	9	3.83583	0.00702169	0	NA	NA	9	42.7076	0.0557781	0	NA	NA	9	0.0565817	0.0349308	0	NA	NA	9	0.0146779	0.0112854	0	0.0604784	0.0332668	0	90.9297
2009-12-31 17:30:00	NA	NA	9	NA	NA	9	912.995	0.335761	0	NA	NA	9	NA	NA	9	2.99364	0.0138295	0	NA	NA	9	NA	NA	9	3.83474	0.00357026	0	NA	NA	9	42.7445	0.0483737	0	NA	NA	9	0.00354374	0.0107054	0	NA	NA	9	0.0150835	0.0112171	0	0.0198978	0.00919167	0	137.923
2009-12-31 18:30:00	NA	NA	9	NA	NA	9	913.269	0.331272	0	NA	NA	9	NA	NA	9	3.00749	0.0117848	0	NA	NA	9	NA	NA	9	3.83534	0.00323353	0	NA	NA	9	42.7336	0.0407452	0	NA	NA	9	-0.0446797	0.0196971	0	NA	NA	9	-0.0349345	0.0134843	0	0.057526	0.0218453	0	230.633
2009-12-31 19:30:00	NA	NA	9	NA	NA	9	913.285	0.298764	0	NA	NA	9	NA	NA	9	3.05102	0.0272994	0	NA	NA	9	NA	NA	9	3.83742	0.00320597	0	NA	NA	9	42.7022	0.044366	0	NA	NA	9	-0.0586407	0.0326647	0	NA	NA	9	-0.0370842	0.0247294	0	0.0727916	0.0345486	0	237.694
2009-12-31 20:30:00	NA	NA	9	NA	NA	9	912.926	0.320929	0	NA	NA	9	NA	NA	9	3.10729	0.011558	0	NA	NA	9	NA	NA	9	3.84048	0.00296449	0	NA	NA	9	42.6666	0.0390046	0	NA	NA	9	-0.100896	0.0263495	0	NA	NA	9	-0.022565	0.014392	0	0.104395	0.0263103	0	257.259
2009-12-31 21:30:00	NA	NA	9	NA	NA	9	912.255	0.422675	0	NA	NA	9	NA	NA	9	3.13453	0.0123505	0	NA	NA	3	NA	NA	9	3.84266	0.00306835	0	NA	NA	9	42.6583	0.038639	0	NA	NA	9	-0.0933901	0.0212232	0	NA	NA	9	-0.022834	0.0208993	0	0.0979294	0.023237	0	256.97
2009-12-31 22:30:00	NA	NA	9	NA	NA	9	911.429	0.428129	0	NA	NA	9	NA	NA	9	3.14721	0.0102335	0	4.27534	0.0072665	1	NA	NA	9	3.84368	0.00312821	0	NA	NA	9	42.6549	0.04084	0	NA	NA	9	-0.0828028	0.0185208	0	NA	NA	9	-0.0416663	0.0174792	0	0.0944944	0.0176505	0	242.983
2009-12-31 23:30:00	NA	NA	9	NA	NA	9	910.458	0.395282	0	NA	NA	9	NA	NA	9	3.171	0.0227244	0	NA	NA	3	NA	NA	9	3.84728	0.00395284	0	NA	NA	9	42.669	0.0446294	0	NA	NA	9	-0.0381869	0.0105989	0	NA	NA	9	-0.0260095	0.0126021	0	0.0477959	0.0110159	0	235.88
2010-01-01 00:30:00	NA	NA	9	NA	NA	9	909.558	0.437789	0	NA	NA	9	NA	NA	9	3.18091	0.0146332	0	NA	NA	9	NA	NA	9	3.84535	0.00318486	0	NA	NA	9	42.6326	0.0413675	0	NA	NA	9	-0.0169865	0.010579	0	NA	NA	9	-0.0308805	0.0139943	0	0.0357551	0.0164759	0	206.856
2010-01-01 01:30:00	NA	NA	9	NA	NA	9	909.091	0.342347	0	NA	NA	9	NA	NA	9	3.20126	0.0188874	0	NA	NA	9	NA	NA	9	3.84804	0.00359017	0	NA	NA	9	42.6397	0.0442022	0	NA	NA	9	0.0261742	0.0255688	0	NA	NA	9	0.0178185	0.0171448	0	0.0362418	0.025232	0	102.093
2010-01-01 02:30:00	NA	NA	9	NA	NA	9	908.976	0.310592	0	NA	NA	9	NA	NA	9	3.16101	0.0172507	0	NA	NA	9	NA	NA	9	3.84547	0.00326554	0	NA	NA	9	42.6606	0.0409764	0	NA	NA	9	0.0685834	0.0412683	0	NA	NA	9	-0.00786486	0.0220973	0	0.0736811	0.039085	0	106.276
2010-01-01 03:30:00	NA	NA	9	NA	NA	9	909.362	0.33888	0	NA	NA	9	NA	NA	9	3.09809	0.0150157	0	NA	NA	9	NA	NA	9	3.84135	0.00330654	0	NA	NA	9	42.6917	0.0428996	0	NA	NA	9	0.0734494	0.0254754	0	NA	NA	9	-0.0157975	0.0155339	0	0.0772106	0.0239376	0	104.763
2010-01-01 04:30:00	NA	NA	9	NA	NA	9	909.984	0.336237	0	NA	NA	9	NA	NA	9	3.08037	0.0121543	0	NA	NA	9	NA	NA	9	3.84037	0.00305732	0	NA	NA	9	42.7024	0.0406548	0	NA	NA	9	0.0489095	0.0153656	0	NA	NA	9	-0.0143682	0.0135381	0	0.0529996	0.0144533	0	107.264
2010-01-01 05:30:00	NA	NA	9	NA	NA	9	910.583	0.37864	0	NA	NA	9	NA	NA	9	3.07584	0.0102095	0	NA	NA	9	NA	NA	9	3.83882	0.00320994	0	NA	NA	9	42.6886	0.0415166	0	NA	NA	9	0.0158654	0.0131125	0	NA	NA	9	-0.0290665	0.0057175	0	0.0351529	0.00808642	0	154.209
2010-01-01 06:30:00	NA	NA	9	NA	NA	9	911.335	0.400012	0	NA	NA	9	NA	NA	9	3.07429	0.0166263	0	NA	NA	9	NA	NA	9	3.83777	0.00288116	0	NA	NA	9	42.6772	0.0432221	0	NA	NA	9	-0.00033076	0.00607285	0	NA	NA	9	-0.0233825	0.0147763	0	0.0256176	0.0120727	0	166.882
2010-01-01 07:30:00	NA	NA	9	NA	NA	9	911.966	0.33683	0	NA	NA	9	NA	NA	9	3.08401	0.0163793	0	NA	NA	9	NA	NA	9	3.83976	0.00314317	0	NA	NA	9	42.6888	0.0419036	0	NA	NA	9	-0.0163698	0.00793295	0	NA	NA	9	-0.0245381	0.011034	0	0.0305998	0.0108805	0	214.391
2010-01-01 08:30:00	NA	NA	9	NA	NA	9	912.687	0.361849	0	NA	NA	9	NA	NA	9	2.91391	0.0605489	0	NA	NA	9	NA	NA	9	3.82781	0.00543189	0	NA	NA	9	42.7632	0.0478621	0	NA	NA	9	-0.0882579	0.0432576	0	NA	NA	9	0.0184271	0.030445	0	0.0964334	0.0403371	0	271.408
2010-01-01 09:30:00	NA	NA	9	NA	NA	9	912.667	0.322584	0	NA	NA	9	NA	NA	9	2.91798	0.0159573	0	NA	NA	9	NA	NA	9	3.82883	0.00348606	0	NA	NA	9	42.7706	0.0436606	0	NA	NA	9	-0.119695	0.0349558	0	NA	NA	9	0.00137083	0.020856	0	0.121577	0.0347073	0	270.092
2010-01-01 10:30:00	NA	NA	9	NA	NA	9	912.339	0.331811	0	NA	NA	9	NA	NA	9	2.96379	0.0163784	0	NA	NA	9	NA	NA	9	3.83262	0.00312037	0	NA	NA	9	42.7578	0.0413993	0	NA	NA	9	-0.111714	0.0315152	0	NA	NA	9	0.0101234	0.0256671	0	0.115092	0.031431	0	274.029
2010-01-01 11:30:00	NA	NA	9	NA	NA	9	911.873	0.33093	0	NA	NA	9	NA	NA	9	3.00802	0.0198328	0	NA	NA	9	NA	NA	9	3.83569	0.00314285	0	NA	NA	9	42.7381	0.0420818	0	NA	NA	9	-0.11269	0.0302565	0	NA	NA	9	-0.00975631	0.0209967	0	0.115165	0.0297878	0	264.361
2010-01-01 12:30:00	NA	NA	9	NA	NA	9	911.459	0.328574	0	NA	NA	9	NA	NA	9	2.99927	0.0138029	0	NA	NA	9	NA	NA	9	3.8351	0.00321838	0	NA	NA	9	42.7425	0.0409819	0	NA	NA	9	-0.102002	0.0304949	0	NA	NA	9	-0.0170587	0.0209985	0	0.105644	0.0300903	0	259.69
2010-01-01 13:30:00	NA	NA	9	NA	NA	9	911.265	0.28536	0	NA	NA	9	NA	NA	9	2.98014	0.0159342	0	NA	NA	9	NA	NA	9	3.8341	0.00331489	0	NA	NA	9	42.7554	0.044478	0	NA	NA	9	-0.0826597	0.0435585	0	NA	NA	9	-0.0622889	0.0308346	0	0.113059	0.0278774	0	229.728
2010-01-01 14:30:00	NA	NA	9	NA	NA	9	911.437	0.331338	0	NA	NA	9	NA	NA	9	3.02705	0.0302265	0	NA	NA	9	NA	NA	9	3.83694	0.0032731	0	NA	NA	9	42.729	0.0479477	0	NA	NA	9	-0.0550459	0.0228953	0	NA	NA	9	-0.0687052	0.0257302	0	0.0905174	0.0272587	0	218.674
2010-01-01 15:30:00	NA	NA	9	NA	NA	9	911.617	0.346879	0	NA	NA	9	NA	NA	9	3.03485	0.0121771	0	NA	NA	9	NA	NA	9	3.83713	0.0030398	0	NA	NA	9	42.7208	0.0412344	0	NA	NA	9	-0.0394957	0.0233259	0	NA	NA	9	-0.0483018	0.0155678	0	0.0658003	0.0186948	0	216.725
2010-01-01 16:30:00	NA	NA	9	NA	NA	9	912.095	0.3503	0	NA	NA	9	NA	NA	9	3.03624	0.0201027	0	NA	NA	9	NA	NA	9	3.83692	0.00336333	0	NA	NA	9	42.7161	0.0416118	0	NA	NA	9	0.0325765	0.0296597	0	NA	NA	9	0.00787278	0.0410522	0	0.0567246	0.0216642	0	99.9342
2010-01-01 17:30:00	NA	NA	9	NA	NA	9	912.656	0.38024	0	NA	NA	9	NA	NA	9	3.02442	0.0107887	0	NA	NA	9	NA	NA	9	3.83615	0.00328861	0	NA	NA	9	42.7217	0.0407724	0	NA	NA	9	1.256e-05	0.0196834	0	NA	NA	9	-0.0242739	0.0133412	0	0.032021	0.0113606	0	171.981
2010-01-01 18:30:00	NA	NA	9	NA	NA	9	913.249	0.351017	0	NA	NA	9	NA	NA	9	3.04152	0.0111774	0	NA	NA	9	NA	NA	9	3.83765	0.00322369	0	NA	NA	9	42.7175	0.0434904	0	NA	NA	9	-0.0736708	0.0295879	0	NA	NA	9	-0.0398081	0.0131338	0	0.0859494	0.0259324	0	238.882
2010-01-01 19:30:00	NA	NA	9	NA	NA	9	913.547	0.293603	0	NA	NA	9	NA	NA	9	3.05853	0.0246465	0	NA	NA	9	NA	NA	9	3.84003	0.00329519	0	NA	NA	9	42.7247	0.0427779	0	NA	NA	9	-0.102279	0.0351383	0	NA	NA	9	-0.03284	0.0269138	0	0.109919	0.0376294	0	253.138
2010-01-01 20:30:00	NA	NA	9	NA	NA	9	913.396	0.306097	0	NA	NA	9	NA	NA	9	3.14127	0.0247633	0	NA	NA	9	NA	NA	9	3.84552	0.00366912	0	NA	NA	9	42.6844	0.041199	0	NA	NA	9	-0.0956676	0.0358582	0	NA	NA	9	-0.0162499	0.0240873	0	0.100231	0.0351535	0	259.373
2010-01-01 21:30:00	NA	NA	9	NA	NA	9	912.987	0.352952	0	NA	NA	9	NA	NA	9	3.2	0.0178718	0	NA	NA	9	NA	NA	9	3.84907	0.00322888	0	NA	NA	9	42.6517	0.0436436	0	NA	NA	9	-0.0779636	0.0284856	0	NA	NA	9	-0.0187772	0.0195285	0	0.0828997	0.0274063	0	254.684
2010-01-01 22:30:00	NA	NA	9	NA	NA	9	912.218	0.403298	0	NA	NA	9	NA	NA	9	3.22421	0.0150352	0	NA	NA	9	NA	NA	9	3.85081	0.00305527	0	NA	NA	9	42.642	0.0398294	0	NA	NA	9	-0.0606467	0.0234084	0	NA	NA	9	-0.037615	0.0255633	0	0.0749892	0.0258975	0	238.135
2010-01-01 23:30:00	NA	NA	9	NA	NA	9	911.279	0.436652	0	NA	NA	9	NA	NA	9	3.24721	0.0219251	0	NA	NA	9	NA	NA	9	3.85137	0.00337361	0	NA	NA	9	42.6195	0.0435316	0	NA	NA	9	0.0159814	0.0294706	0	NA	NA	9	-0.0371909	0.0442322	0	0.0578813	0.0333522	0	141.657
2010-01-02 00:30:00	NA	NA	9	NA	NA	9	910.432	0.347021	0	NA	NA	9	NA	NA	9	3.21321	0.0298899	0	NA	NA	9	NA	NA	9	3.84929	0.00379883	0	NA	NA	9	42.6387	0.0438062	0	NA	NA	9	0.0580392	0.0180855	0	NA	NA	9	0.0553476	0.0150685	0	0.0811366	0.0200703	0	46.1982
2010-01-02 01:30:00	NA	NA	9	NA	NA	9	909.779	0.351322	0	NA	NA	9	NA	NA	9	3.16242	0.0133086	0	NA	NA	9	NA	NA	9	3.84565	0.00343846	0	NA	NA	9	42.6604	0.0452398	0	NA	NA	9	0.0124398	0.0109261	0	NA	NA	9	0.00595925	0.0247653	0	0.0262152	0.0153444	0	107.523
2010-01-02 02:30:00	NA	NA	9	NA	NA	9	909.334	0.289417	0	NA	NA	9	NA	NA	9	3.14028	0.0196277	0	NA	NA	9	NA	NA	9	3.84305	0.00378051	0	NA	NA	9	42.6575	0.0434619	0	NA	NA	9	0.0414616	0.00970092	0	NA	NA	9	-0.00676518	0.0101951	0	0.0433514	0.00913599	0	100.838
2010-01-02 03:30:00	NA	NA	9	NA	NA	9	909.389	0.321693	0	NA	NA	9	NA	NA	9	3.11036	0.0145884	0	NA	NA	9	NA	NA	9	3.84206	0.00328266	0	NA	NA	9	42.6843	0.0441663	0	NA	NA	9	0.0640255	0.0174434	0	NA	NA	9	0.0229624	0.0193234	0	0.0700291	0.0199995	0	72.1048
2010-01-02 04:30:00	NA	NA	9	NA	NA	9	909.712	0.354319	0	NA	NA	9	NA	NA	9	3.06229	0.0216132	0	NA	NA	9	NA	NA	9	3.83912	0.00383899	0	NA	NA	9	42.7108	0.0434901	0	NA	NA	9	0.0564532	0.0154627	0	NA	NA	9	0.0104089	0.0242348	0	0.061371	0.0188433	0	83.4406
2010-01-02 05:30:00	NA	NA	9	NA	NA	9	910.448	0.376278	0	NA	NA	9	NA	NA	9	3.03339	0.0165703	0	NA	NA	9	NA	NA	9	3.83653	0.00368076	0	NA	NA	9	42.716	0.0459989	0	NA	NA	9	0.0400802	0.016917	0	NA	NA	9	-0.0147427	0.0135415	0	0.0461912	0.0126304	0	113.081
2010-01-02 06:30:00	NA	NA	9	NA	NA	9	911.239	0.385579	0	NA	NA	9	NA	NA	9	3.03208	0.0108358	0	NA	NA	9	NA	NA	9	3.83673	0.00344395	0	NA	NA	9	42.7197	0.0438094	0	NA	NA	9	0.0250481	0.0186614	0	NA	NA	9	-0.0198163	0.0178473	0	0.0384485	0.0144337	0	128.423
2010-01-02 07:30:00	NA	NA	9	NA	NA	9	912.001	0.350406	0	NA	NA	9	NA	NA	9	3.04493	0.0169357	0	NA	NA	9	NA	NA	9	3.83812	0.00374084	0	NA	NA	9	42.7197	0.0469024	0	NA	NA	9	-0.0124515	0.0188859	0	NA	NA	9	-0.0174953	0.0148091	0	0.0302568	0.0110173	0	209.991
2010-01-02 08:30:00	NA	NA	9	NA	NA	9	912.339	0.3256	0	NA	NA	9	NA	NA	9	3.18156	0.0580564	0	NA	NA	9	NA	NA	9	3.84876	0.00581611	0	NA	NA	9	42.6725	0.0507468	0	NA	NA	9	-0.0337884	0.0307741	0	NA	NA	9	-0.069269	0.0555957	0	0.086125	0.0505908	0	214.296
2010-01-02 09:30:00	NA	NA	9	NA	NA	9	912.517	0.332959	0	NA	NA	9	NA	NA	9	3.21843	0.0279062	0	NA	NA	9	NA	NA	9	3.85008	0.00371337	0	NA	NA	9	42.6403	0.0410426	0	NA	NA	9	-0.0591503	0.0225273	0	NA	NA	9	-0.0450882	0.0379454	0	0.0805854	0.0313765	0	236.018
2010-01-02 10:30:00	NA	NA	9	NA	NA	9	912.464	0.316948	0	NA	NA	9	NA	NA	9	3.19029	0.0158219	0	NA	NA	9	NA	NA	9	3.84996	0.00298085	0	NA	NA	9	42.6758	0.0403603	0	NA	NA	9	-0.0794469	0.0283939	0	NA	NA	9	-0.0161036	0.017483	0	0.0833134	0.0272338	0	256.569
2010-01-02 11:30:00	NA	NA	9	NA	NA	9	912.167	0.349808	0	NA	NA	9	NA	NA	9	3.17804	0.0153698	0	NA	NA	9	NA	NA	9	3.8483	0.0033018	0	NA	NA	9	42.6714	0.0432913	0	NA	NA	9	-0.0795143	0.0292089	0	NA	NA	9	-0.0163577	0.0168852	0	0.083348	0.0279516	0	255.94
2010-01-02 12:30:00	NA	NA	9	NA	NA	9	911.683	0.316034	0	NA	NA	9	NA	NA	9	3.16918	0.0236932	0	NA	NA	9	NA	NA	9	3.84667	0.00355984	0	NA	NA	9	42.6631	0.0438152	0	NA	NA	9	-0.0189992	0.0418307	0	NA	NA	9	0.00046389	0.032349	0	0.0492378	0.0270545	0	188.679
2010-01-02 13:30:00	NA	NA	9	NA	NA	9	911.253	0.318072	0	NA	NA	9	NA	NA	9	3.16451	0.0175542	0	NA	NA	9	NA	NA	9	3.84589	0.00337829	0	NA	NA	9	42.6598	0.0435344	0	NA	NA	9	0.0308798	0.0100105	0	NA	NA	9	0.0215294	0.0148366	0	0.0394706	0.0133942	0	57.402
2010-01-02 14:30:00	NA	NA	9	NA	NA	9	910.886	0.30059	0	NA	NA	9	NA	NA	9	3.16969	0.0181913	0	NA	NA	9	NA	NA	9	3.84628	0.00326044	0	NA	NA	9	42.6581	0.0454155	0	NA	NA	9	0.0413645	0.0127706	0	NA	NA	9	0.0174996	0.0108507	0	0.0456987	0.0144799	0	68.2576
2010-01-02 15:30:00	NA	NA	9	NA	NA	9	911.172	0.339438	0	NA	NA	9	NA	NA	9	3.0852	0.0324909	0	NA	NA	9	NA	NA	9	3.82849	0.0407872	0	NA	NA	9	42.5476	0.50277	0	NA	NA	9	0.0715293	0.0193596	0	NA	NA	9	0.0219368	0.0158062	0	0.0758335	0.0217138	0	74.8181
2010-01-02 16:30:00	NA	NA	9	NA	NA	9	911.376	0.346336	0	NA	NA	9	NA	NA	9	3.08133	0.0163876	0	NA	NA	9	NA	NA	9	3.84001	0.00333655	0	NA	NA	9	42.6957	0.0414325	0	NA	NA	9	0.0274715	0.0109127	0	NA	NA	9	-0.00160362	0.00897178	0	0.0292303	0.0101177	0	92.1174
2010-01-02 17:30:00	NA	NA	9	NA	NA	9	911.865	0.345946	0	NA	NA	9	NA	NA	9	3.07572	0.0127024	0	NA	NA	9	NA	NA	9	3.8408	0.00327346	0	NA	NA	9	42.7127	0.041725	0	NA	NA	9	0.00888186	0.00627012	0	NA	NA	9	0.0107639	0.0105782	0	0.0167953	0.00798945	0	79.4904
2010-01-02 18:30:00	NA	NA	9	NA	NA	9	912.976	0.469423	0	NA	NA	9	NA	NA	9	2.85754	0.109232	0	NA	NA	9	NA	NA	9	3.82404	0.00886379	0	NA	NA	9	42.7903	0.0611512	0	NA	NA	9	-0.067735	0.042256	0	NA	NA	9	0.00583705	0.0243183	0	0.0733036	0.040314	0	258.446
2010-01-02 19:30:00	NA	NA	9	NA	NA	9	913.662	0.299472	0	NA	NA	9	NA	NA	9	2.81772	0.0246072	0	NA	NA	9	NA	NA	9	3.82021	0.00376194	0	NA	NA	9	42.7945	0.0427298	0	NA	NA	9	-0.0813116	0.033718	0	NA	NA	9	-0.00172673	0.0244025	0	0.0852616	0.0328183	0	266.029
2010-01-02 20:30:00	NA	NA	9	NA	NA	9	913.545	0.343215	0	NA	NA	9	NA	NA	9	3.03131	0.0524234	0	NA	NA	9	NA	NA	9	3.83791	0.00522105	0	NA	NA	9	42.7341	0.0530937	0	NA	NA	9	-0.044451	0.0305078	0	NA	NA	9	-0.045628	0.0397473	0	0.0716943	0.0377849	0	226.384
2010-01-02 21:30:00	NA	NA	9	NA	NA	9	913.301	0.324407	0	NA	NA	9	NA	NA	9	3.12726	0.0179593	0	NA	NA	9	NA	NA	9	3.84568	0.00322051	0	NA	NA	9	42.7049	0.0388586	0	NA	NA	9	-0.0870578	0.0330079	0	NA	NA	9	-0.0301378	0.0193396	0	0.0945915	0.0316715	0	248.793
2010-01-02 22:30:00	NA	NA	9	NA	NA	9	912.789	0.403794	0	NA	NA	9	NA	NA	9	3.19373	0.0372178	0	NA	NA	9	NA	NA	9	3.84982	0.00378471	0	NA	NA	9	42.6694	0.0441562	0	NA	NA	9	-0.0723431	0.0269164	0	NA	NA	9	-0.0232363	0.0197323	0	0.078331	0.027411	0	251.894
2010-01-02 23:30:00	NA	NA	9	NA	NA	9	911.732	0.46982	0	NA	NA	9	NA	NA	9	3.34326	0.0558373	0	NA	NA	9	NA	NA	9	3.85856	0.00456562	0	NA	NA	9	42.5827	0.048682	0	NA	NA	9	-0.0324102	0.0245708	0	NA	NA	9	0.00993903	0.0292964	0	0.0444796	0.0251458	0	269.303
2010-01-03 00:30:00	NA	NA	9	NA	NA	9	910.878	0.327053	0	NA	NA	9	NA	NA	9	3.34495	0.10152	0	NA	NA	9	NA	NA	9	3.85626	0.00647733	0	NA	NA	9	42.5526	0.0762934	0	NA	NA	9	0.0819684	0.0627212	0	NA	NA	9	0.0275878	0.0517237	0	0.0968922	0.0685567	0	94.1313
2010-01-03 01:30:00	NA	NA	9	NA	NA	9	910.386	0.370437	0	NA	NA	9	NA	NA	9	3.13694	0.0237884	0	NA	NA	9	NA	NA	9	3.84447	0.00370641	0	NA	NA	9	42.6788	0.0421518	0	NA	NA	9	0.0610432	0.0370787	0	NA	NA	9	0.049184	0.0261761	0	0.079826	0.042814	0	51.8759
2010-01-03 02:30:00	NA	NA	9	NA	NA	9	909.712	0.347755	0	NA	NA	9	NA	NA	9	3.1443	0.0148724	0	NA	NA	9	NA	NA	9	3.84437	0.00284286	0	NA	NA	9	42.6684	0.0376504	0	NA	NA	9	0.0613182	0.0136926	0	NA	NA	9	0.0211165	0.0201965	0	0.0675627	0.0153719	0	72.5695
2010-01-03 03:30:00	NA	NA	9	NA	NA	9	909.523	0.308299	0	NA	NA	9	NA	NA	9	3.03001	0.0477969	0	NA	NA	9	NA	NA	9	3.83663	0.00439032	0	NA	NA	9	42.7223	0.0472774	0	NA	NA	9	0.0974066	0.0229197	0	NA	NA	9	0.0405193	0.024767	0	0.107242	0.0277032	0	69.2433
2010-01-03 04:30:00	NA	NA	9	NA	NA	9	909.744	0.400197	0	NA	NA	9	NA	NA	9	2.94527	0.0401143	0	NA	NA	9	NA	NA	9	3.83012	0.00432484	0	NA	NA	9	42.7525	0.0454707	0	NA	NA	9	0.0714877	0.012811	0	NA	NA	9	0.0223471	0.00997408	0	0.0755707	0.0127477	0	72.5564
2010-01-03 05:30:00	NA	NA	9	NA	NA	9	910.305	0.340663	0	NA	NA	9	NA	NA	9	2.91715	0.0331359	0	NA	NA	9	NA	NA	9	3.82864	0.00404668	0	NA	NA	9	42.7708	0.0422625	0	NA	NA	9	0.0523253	0.0190047	0	NA	NA	9	-0.0103406	0.0126444	0	0.0549383	0.0186443	0	103.092
2010-01-03 06:30:00	NA	NA	9	NA	NA	9	910.896	0.390833	0	NA	NA	9	NA	NA	9	2.93387	0.0208426	0	NA	NA	9	NA	NA	9	3.82974	0.00317369	0	NA	NA	9	42.7621	0.0426616	0	NA	NA	9	0.000494379	0.0389885	0	NA	NA	9	-0.00432781	0.0140821	0	0.0369569	0.0192567	0	173.753
2010-01-03 07:30:00	NA	NA	9	NA	NA	9	911.912	0.389968	0	NA	NA	9	NA	NA	9	2.84681	0.0212392	0	NA	NA	9	NA	NA	9	3.82413	0.00335159	0	NA	NA	9	42.8063	0.0410038	0	NA	NA	9	-0.0739955	0.0326882	0	NA	NA	9	0.00613998	0.0255677	0	0.0787732	0.0320884	0	269.309
2010-01-03 08:30:00	NA	NA	9	NA	NA	9	912.625	0.337802	0	NA	NA	9	NA	NA	9	2.86757	0.0180465	0	NA	NA	9	NA	NA	9	3.8256	0.0033147	0	NA	NA	9	42.7968	0.0420553	0	NA	NA	9	-0.0878641	0.0352927	0	NA	NA	9	-0.018621	0.0224792	0	0.0929224	0.0343925	0	256.626
2010-01-03 09:30:00	NA	NA	9	NA	NA	9	913.158	0.312879	0	NA	NA	9	NA	NA	9	2.86132	0.0135531	0	NA	NA	9	NA	NA	9	3.82585	0.00319371	0	NA	NA	9	42.8079	0.0397155	0	NA	NA	9	-0.107745	0.0341307	0	NA	NA	9	-0.0238994	0.0228545	0	0.112848	0.0336527	0	256.91
2010-01-03 10:30:00	NA	NA	9	NA	NA	9	913.26	0.313389	0	NA	NA	9	NA	NA	9	2.90819	0.0162131	0	NA	NA	9	NA	NA	9	3.82849	0.003132	0	NA	NA	9	42.779	0.038666	0	NA	NA	9	-0.110677	0.0290708	0	NA	NA	9	-0.0641424	0.0406729	0	0.132318	0.0368003	0	241.809
2010-01-03 11:30:00	NA	NA	9	NA	NA	9	912.999	0.32014	0	NA	NA	9	NA	NA	9	2.93636	0.0182578	0	NA	NA	9	NA	NA	9	3.83087	0.00304152	0	NA	NA	9	42.7716	0.0380931	0	NA	NA	9	-0.0828899	0.0305315	0	NA	NA	9	-0.0542858	0.0396601	0	0.103173	0.0409592	0	239.225
2010-01-03 12:30:00	NA	NA	9	NA	NA	9	912.405	0.411277	0	NA	NA	9	NA	NA	9	3.00431	0.036485	0	NA	NA	9	NA	NA	9	3.83583	0.00403722	0	NA	NA	9	42.7444	0.0488563	0	NA	NA	9	0.00334997	0.038175	0	NA	NA	9	-0.0051888	0.018577	0	0.0358597	0.0235366	0	155.969
2010-01-03 13:30:00	NA	NA	9	NA	NA	9	911.913	0.300693	0	NA	NA	9	NA	NA	9	2.97755	0.0310328	0	NA	NA	9	NA	NA	9	3.83411	0.00393832	0	NA	NA	9	42.7585	0.0423589	0	NA	NA	9	0.0673428	0.0156532	0	NA	NA	9	0.0464062	0.01596	0	0.082667	0.0188258	0	56.1314
2010-01-03 14:30:00	NA	NA	9	NA	NA	9	911.482	0.319598	0	NA	NA	9	NA	NA	9	2.92887	0.00999195	0	NA	NA	9	NA	NA	9	3.83007	0.00311009	0	NA	NA	9	42.7725	0.0403188	0	NA	NA	9	0.0345413	0.00879197	0	NA	NA	9	0.0119079	0.0122522	0	0.0378416	0.0114138	0	73.2483
2010-01-03 15:30:00	NA	NA	9	NA	NA	9	911.248	0.314088	0	NA	NA	9	NA	NA	9	2.89497	0.02071	0	NA	NA	9	NA	NA	9	3.82739	0.00386121	0	NA	NA	9	42.7839	0.0438395	0	NA	NA	9	0.0452789	0.0100184	0	NA	NA	9	-0.00526597	0.00957073	0	0.0464886	0.0104233	0	96.3931
2010-01-03 16:30:00	NA	NA	9	NA	NA	9	911.281	0.315646	0	NA	NA	9	NA	NA	9	2.88208	0.0172302	0	NA	NA	9	NA	NA	9	3.82726	0.00352629	0	NA	NA	9	42.7993	0.0433379	0	NA	NA	9	0.0207702	0.00826661	0	NA	NA	9	-0.018639	0.0109014	0	0.029781	0.0088895	0	130.464
2010-01-03 17:30:00	NA	NA	9	NA	NA	9	911.599	0.377367	0	NA	NA	9	NA	NA	9	2.89474	0.0120653	0	NA	NA	9	NA	NA	9	3.82725	0.00314089	0	NA	NA	9	42.7822	0.0409401	0	NA	NA	9	0.00510512	0.0176493	0	NA	NA	9	-0.0138945	0.0077365	0	0.0235344	0.00603487	0	167.807
2010-01-03 18:30:00	NA	NA	9	NA	NA	9	912.244	0.388105	0	NA	NA	9	NA	NA	9	2.89237	0.0134567	0	NA	NA	9	NA	NA	9	3.82823	0.00295445	0	NA	NA	9	42.7972	0.0391156	0	NA	NA	9	-0.0304981	0.0201876	0	NA	NA	9	-0.019223	0.0124653	0	0.0381765	0.0201258	0	233.284
2010-01-03 19:30:00	NA	NA	9	NA	NA	9	912.799	0.3878	0	NA	NA	9	NA	NA	9	2.91145	0.0163432	0	NA	NA	9	NA	NA	9	3.82891	0.00297827	0	NA	NA	9	42.7802	0.0373259	0	NA	NA	9	-0.0328967	0.0194096	0	NA	NA	9	-0.00341933	0.0144236	0	0.0373963	0.0167334	0	254.237
2010-01-03 20:30:00	NA	NA	9	NA	NA	9	913.208	0.331329	0	NA	NA	9	NA	NA	9	2.94356	0.0188448	0	NA	NA	9	NA	NA	9	3.83153	0.00300346	0	NA	NA	9	42.7703	0.0389437	0	NA	NA	9	-0.0308393	0.0293178	0	NA	NA	9	-0.0171883	0.0155127	0	0.041478	0.0250197	0	225.33
2010-01-03 21:30:00	NA	NA	9	NA	NA	9	913.592	0.306214	0	NA	NA	9	NA	NA	9	2.90816	0.0106439	0	NA	NA	9	NA	NA	9	3.82986	0.00334381	0	NA	NA	9	42.7959	0.0432018	0	NA	NA	9	-0.0881023	0.0306542	0	NA	NA	9	-0.0411637	0.0176995	0	0.0987879	0.0308252	0	243.956
2010-01-03 22:30:00	NA	NA	9	NA	NA	9	913.513	0.32377	0	NA	NA	9	NA	NA	9	2.92303	0.011943	0	NA	NA	9	NA	NA	9	3.83148	0.00349991	0	NA	NA	9	42.7966	0.0469376	0	NA	NA	9	-0.101607	0.0321654	0	NA	NA	9	-0.0324786	0.026888	0	0.109471	0.0339423	0	252.71
2010-01-03 23:30:00	NA	NA	9	NA	NA	9	913.108	0.355538	0	NA	NA	9	NA	NA	9	2.92792	0.0125163	0	NA	NA	9	NA	NA	9	3.83079	0.00332828	0	NA	NA	9	42.7817	0.0400957	0	NA	NA	9	-0.0775863	0.0297225	0	NA	NA	9	-0.0449923	0.0226604	0	0.0911287	0.0337087	0	239.585
2010-01-04 00:30:00	NA	NA	9	NA	NA	9	912.342	0.393525	0	NA	NA	9	NA	NA	9	2.94815	0.0261111	0	NA	NA	9	NA	NA	9	3.83276	0.00391833	0	NA	NA	9	42.7802	0.0454295	0	NA	NA	9	-0.0700308	0.0186584	0	NA	NA	9	-0.0685382	0.0231027	0	0.0993331	0.0248285	0	226.064
2010-01-04 01:30:00	NA	NA	9	NA	NA	9	911.314	0.432024	0	NA	NA	9	NA	NA	9	3.03438	0.0350709	0	NA	NA	9	NA	NA	9	3.83942	0.00341691	0	NA	NA	9	42.7504	0.0450181	0	NA	NA	9	-0.0357643	0.00988435	0	NA	NA	9	-0.0464496	0.0087032	0	0.0591636	0.0104748	0	217.271
2010-01-04 02:30:00	NA	NA	9	NA	NA	9	910.415	0.371322	0	NA	NA	9	NA	NA	9	3.07834	0.0282325	0	NA	NA	9	NA	NA	9	3.84124	0.00397981	0	NA	NA	9	42.7157	0.0482985	0	NA	NA	9	0.0213326	0.028089	0	NA	NA	9	0.0046896	0.0292509	0	0.037524	0.0267041	0	128.896
2010-01-04 03:30:00	NA	NA	9	NA	NA	9	909.888	0.338698	0	NA	NA	9	NA	NA	9	3.03267	0.0131998	0	NA	NA	9	NA	NA	9	3.83831	0.00331492	0	NA	NA	9	42.7396	0.0426227	0	NA	NA	9	0.0326686	0.0139067	0	NA	NA	9	0.0199763	0.0124477	0	0.0398906	0.0149433	0	59.0196
2010-01-04 04:30:00	NA	NA	9	NA	NA	9	909.884	0.330758	0	NA	NA	9	NA	NA	9	2.94617	0.0632136	0	NA	NA	9	NA	NA	9	3.831	0.00538361	0	NA	NA	9	42.7622	0.0468273	0	NA	NA	9	0.0509707	0.0176813	0	NA	NA	9	-3.45903e-05	0.0175553	0	0.0540615	0.0172046	0	92.7217
2010-01-04 05:30:00	NA	NA	9	NA	NA	9	910.11	0.330742	0	NA	NA	9	NA	NA	9	2.89723	0.0131192	0	NA	NA	9	NA	NA	9	3.82779	0.00367329	0	NA	NA	9	42.7867	0.0453925	0	NA	NA	9	0.0375947	0.0097983	0	NA	NA	9	-0.00145134	0.0107163	0	0.0393221	0.00894499	0	94.9099
2010-01-04 06:30:00	NA	NA	9	NA	NA	9	910.535	0.349777	0	NA	NA	9	NA	NA	9	2.89997	0.013806	0	NA	NA	9	NA	NA	9	3.82806	0.00312361	0	NA	NA	9	42.7861	0.0419457	0	NA	NA	9	0.0183027	0.00999847	0	NA	NA	9	-0.0196434	0.0107024	0	0.0283017	0.01159	0	136.18
2010-01-04 07:30:00	NA	NA	9	NA	NA	9	911.354	0.433919	0	NA	NA	9	NA	NA	9	2.88843	0.0171283	0	NA	NA	9	NA	NA	9	3.82765	0.00327903	0	NA	NA	9	42.7957	0.0451965	0	NA	NA	9	0.0110624	0.0152984	0	NA	NA	9	0.00891169	0.0157172	0	0.0252792	0.00660182	0	156.158
2010-01-04 08:30:00	NA	NA	9	NA	NA	9	912.183	0.333631	0	NA	NA	9	NA	NA	9	2.91019	0.0350156	0	NA	NA	9	NA	NA	9	3.82979	0.00380376	0	NA	NA	9	42.7932	0.0455296	0	NA	NA	9	-0.0124724	0.0107683	0	NA	NA	9	-0.00796366	0.0150283	0	0.0220426	0.00864656	0	233.602
2010-01-04 09:30:00	NA	NA	9	NA	NA	9	912.655	0.324929	0	NA	NA	9	NA	NA	9	3.01628	0.0210146	0	NA	NA	9	NA	NA	9	3.83763	0.00339838	0	NA	NA	9	42.751	0.0448007	0	NA	NA	9	-0.01601	0.0143365	0	NA	NA	9	-0.0163069	0.0108966	0	0.026607	0.0117674	0	219.169
2010-01-04 10:30:00	NA	NA	9	NA	NA	9	912.945	0.318837	0	NA	NA	9	NA	NA	9	3.06183	0.0113484	0	NA	NA	9	NA	NA	9	3.84071	0.00348145	0	NA	NA	9	42.7293	0.043554	0	NA	NA	9	-0.0257095	0.017567	0	NA	NA	9	-0.0103296	0.0185004	0	0.0329601	0.0182206	0	245.073
2010-01-04 11:30:00	NA	NA	9	NA	NA	9	913.045	0.293146	0	NA	NA	9	NA	NA	9	3.06336	0.046359	0	NA	NA	9	NA	NA	9	3.8407	0.00476414	0	NA	NA	9	42.7271	0.043164	0	NA	NA	9	-0.0578683	0.0360234	0	NA	NA	9	-0.0586847	0.0202845	0	0.0845695	0.0367367	0	221.559
2010-01-04 12:30:00	NA	NA	9	NA	NA	9	913.058	0.364175	0	NA	NA	9	NA	NA	9	2.90678	0.0178947	0	NA	NA	9	NA	NA	9	3.82948	0.00340857	0	NA	NA	9	42.7934	0.0415795	0	NA	NA	9	-0.0607521	0.0317169	0	NA	NA	9	-0.0137104	0.019097	0	0.0648733	0.0322602	0	254.57
2010-01-04 13:30:00	NA	NA	9	NA	NA	9	912.413	0.40568	0	NA	NA	9	NA	NA	9	2.98014	0.0547137	0	NA	NA	9	NA	NA	9	3.83507	0.00518559	0	NA	NA	9	42.7669	0.0510565	0	NA	NA	9	-0.0354666	0.02637	0	NA	NA	9	0.000548986	0.0160036	0	0.0417305	0.0216326	0	248.577
2010-01-04 14:30:00	NA	NA	9	NA	NA	9	911.656	0.378085	0	NA	NA	9	NA	NA	9	3.07387	0.0151537	0	NA	NA	9	NA	NA	9	3.8406	0.00347028	0	NA	NA	9	42.7128	0.0426585	0	NA	NA	9	-0.00122034	0.0111466	0	NA	NA	9	-0.0061465	0.00635516	0	0.0127282	0.00646754	0	190.964
2010-01-04 15:30:00	NA	NA	9	NA	NA	9	911.221	0.302496	0	NA	NA	9	NA	NA	9	3.05567	0.0540808	0	NA	NA	9	NA	NA	9	3.83981	0.00527291	0	NA	NA	9	42.7272	0.0509925	0	NA	NA	9	0.0336707	0.0208431	0	NA	NA	9	0.014662	0.0129964	0	0.0383537	0.0219306	0	68.469
2010-01-04 16:30:00	NA	NA	9	NA	NA	9	911.106	0.294991	0	NA	NA	9	NA	NA	9	3.01386	0.0446073	0	NA	NA	9	NA	NA	9	3.83662	0.00448675	0	NA	NA	9	42.7425	0.0425341	0	NA	NA	9	0.0606073	0.0177823	0	NA	NA	9	0.0309069	0.0146299	0	0.0697258	0.017231	0	62.7096
2010-01-04 17:30:00	NA	NA	9	NA	NA	9	911.219	0.300447	0	NA	NA	9	NA	NA	9	2.93213	0.011549	0	NA	NA	9	NA	NA	9	3.83065	0.00342862	0	NA	NA	9	42.7756	0.0441253	0	NA	NA	9	0.0219551	0.0243042	0	NA	NA	9	0.0133195	0.0269036	0	0.0392319	0.0208398	0	89.146
2010-01-04 18:30:00	NA	NA	9	NA	NA	9	911.591	0.317898	0	NA	NA	9	NA	NA	9	2.94269	0.0124754	0	NA	NA	9	NA	NA	9	3.8321	0.00328115	0	NA	NA	9	42.7796	0.0436186	0	NA	NA	9	-0.00544912	0.0108509	0	NA	NA	9	-0.0211859	0.00694371	0	0.0240273	0.00819303	0	191.366
2010-01-04 19:30:00	NA	NA	9	NA	NA	9	911.991	0.306437	0	NA	NA	9	NA	NA	9	2.97785	0.0468969	0	NA	NA	9	NA	NA	9	3.83417	0.00491238	0	NA	NA	9	42.7588	0.0519631	0	NA	NA	9	0.00833887	0.00796276	0	NA	NA	9	-0.0198648	0.0146443	0	0.0260764	0.0078682	0	148.87
2010-01-04 20:30:00	NA	NA	9	NA	NA	9	912.53	0.411229	0	NA	NA	9	NA	NA	9	2.96408	0.0615578	0	NA	NA	9	NA	NA	9	3.83287	0.00603422	0	NA	NA	9	42.7605	0.0437096	0	NA	NA	9	0.0296172	0.0284055	0	NA	NA	9	0.00973611	0.0210026	0	0.041071	0.0230809	0	113.726
2010-01-04 21:30:00	NA	NA	9	NA	NA	9	913.037	0.299091	0	NA	NA	9	NA	NA	9	2.96264	0.0162109	0	NA	NA	9	NA	NA	9	3.83341	0.00378449	0	NA	NA	9	42.7687	0.0466178	0	NA	NA	9	0.00529282	0.0147925	0	NA	NA	9	-0.0115028	0.00675357	0	0.0191951	0.00749589	0	161.083
2010-01-04 22:30:00	NA	NA	9	NA	NA	9	913.164	0.32069	0	NA	NA	9	NA	NA	9	3.00577	0.0234222	0	NA	NA	9	NA	NA	9	3.83796	0.00344337	0	NA	NA	9	42.7687	0.0454777	0	NA	NA	9	-0.00821017	0.00893395	0	NA	NA	9	-0.0137533	0.00562578	0	0.0185455	0.00490313	0	207.318
2010-01-04 23:30:00	NA	NA	9	NA	NA	9	912.931	0.298302	0	NA	NA	9	NA	NA	9	3.03928	0.025	0	NA	NA	9	NA	NA	9	3.83851	0.00374615	0	NA	NA	9	42.7314	0.0455044	0	NA	NA	9	0.0181623	0.0102151	0	NA	NA	9	-0.0106655	0.00745306	0	0.0219251	0.011081	0	119.282
2010-01-05 00:30:00	NA	NA	9	NA	NA	9	912.48	0.402044	0	NA	NA	9	NA	NA	9	3.06331	0.0289127	0	NA	NA	9	NA	NA	9	3.84009	0.00367975	0	NA	NA	9	42.7199	0.0500065	0	NA	NA	9	0.0240087	0.00559162	0	NA	NA	9	-0.0143002	0.0091808	0	0.0292024	0.00660635	0	119.226
2010-01-05 01:30:00	NA	NA	9	NA	NA	9	911.905	0.351135	0	NA	NA	9	NA	NA	9	3.0358	0.0270861	0	NA	NA	9	NA	NA	9	3.8378	0.0034791	0	NA	NA	9	42.7279	0.0436982	0	NA	NA	9	0.0334674	0.0107448	0	NA	NA	9	0.0214292	0.0147604	0	0.0411563	0.0147884	0	62.6151
2010-01-05 02:30:00	NA	NA	9	NA	NA	9	911.258	0.387287	0	NA	NA	9	NA	NA	9	2.96526	0.0213091	0	NA	NA	9	NA	NA	9	3.83306	0.00373193	0	NA	NA	9	42.762	0.045411	0	NA	NA	9	0.0210152	0.00966993	0	NA	NA	9	-0.0116266	0.0152689	0	0.028531	0.0094506	0	120.945
2010-01-05 03:30:00	NA	NA	9	NA	NA	9	910.514	0.382432	0	NA	NA	9	NA	NA	9	3.01319	0.0195322	0	NA	NA	9	NA	NA	9	3.83687	0.00362982	0	NA	NA	9	42.7468	0.0460461	0	NA	NA	9	0.0183664	0.00707449	0	NA	NA	9	-0.0154045	0.00497088	0	0.025036	0.00474862	0	130.761
2010-01-05 04:30:00	NA	NA	9	NA	NA	9	910.066	0.340675	0	NA	NA	9	NA	NA	9	3.03484	0.0279791	0	NA	NA	9	NA	NA	9	3.83865	0.00406015	0	NA	NA	9	42.7409	0.0473752	0	NA	NA	9	0.0138488	0.00451854	0	NA	NA	9	-0.00608571	0.00800761	0	0.0173084	0.00370727	0	113.434
2010-01-05 05:30:00	NA	NA	9	NA	NA	9	909.913	0.333004	0	NA	NA	9	NA	NA	9	3.0665	0.0184224	0	NA	NA	9	NA	NA	9	3.84007	0.00346547	0	NA	NA	9	42.717	0.0445841	0	NA	NA	9	0.0329136	0.00895906	0	NA	NA	9	0.00515212	0.0080116	0	0.0341218	0.0094852	0	81.8158
2010-01-05 06:30:00	NA	NA	9	NA	NA	9	910.452	0.3756	0	NA	NA	9	NA	NA	9	2.95398	0.0431289	0	NA	NA	9	NA	NA	9	3.83214	0.00351845	0	NA	NA	9	42.7659	0.0484888	0	NA	NA	9	0.0912905	0.0248493	0	NA	NA	9	0.0588432	0.0293181	0	0.110285	0.0333235	0	61.0459
2010-01-05 07:30:00	NA	NA	9	NA	NA	9	911.199	0.347034	0	NA	NA	9	NA	NA	9	2.84425	0.0120677	0	NA	NA	9	NA	NA	9	3.82424	0.00324526	0	NA	NA	9	42.8116	0.0418354	0	NA	NA	9	0.0512354	0.0483875	0	NA	NA	9	0.0224484	0.028231	0	0.0640276	0.046554	0	81.0954
2010-01-05 08:30:00	NA	NA	9	NA	NA	9	911.928	0.357449	0	NA	NA	9	NA	NA	9	2.86712	0.0449921	0	NA	NA	9	NA	NA	9	3.82606	0.00522054	0	NA	NA	9	42.8036	0.0488575	0	NA	NA	9	-0.0340739	0.0327814	0	NA	NA	9	-0.0075721	0.0271349	0	0.0460487	0.0301383	0	248.12
2010-01-05 09:30:00	NA	NA	9	NA	NA	9	912.785	0.366242	0	NA	NA	9	NA	NA	9	2.79048	0.0212137	0	NA	NA	9	NA	NA	9	3.82127	0.00366942	0	NA	NA	9	42.8444	0.0417493	0	NA	NA	9	-0.0870206	0.0378742	0	NA	NA	9	-0.0219638	0.0202733	0	0.0923287	0.0370892	0	253.533
2010-01-05 10:30:00	NA	NA	9	NA	NA	9	913.1	0.320201	0	NA	NA	9	NA	NA	9	2.89023	0.0252051	0	NA	NA	9	NA	NA	9	3.82867	0.00390214	0	NA	NA	9	42.8051	0.0444435	0	NA	NA	9	-0.0887484	0.0311714	0	NA	NA	9	-0.026584	0.0352424	0	0.0991842	0.0309592	0	252.868
2010-01-05 11:30:00	NA	NA	9	NA	NA	9	913.298	0.278934	0	NA	NA	9	NA	NA	9	2.91571	0.0331896	0	NA	NA	9	NA	NA	9	3.83114	0.00430825	0	NA	NA	9	42.8022	0.04097	0	NA	NA	9	-0.0612576	0.0316489	0	NA	NA	9	-0.041397	0.0394582	0	0.0821359	0.0357461	0	236.378
2010-01-05 12:30:00	NA	NA	9	NA	NA	9	913.174	0.305889	0	NA	NA	9	NA	NA	9	2.99216	0.0176029	0	NA	NA	9	NA	NA	9	3.83751	0.00342582	0	NA	NA	9	42.7809	0.043669	0	NA	NA	9	-0.0745019	0.0341887	0	NA	NA	9	0.00148949	0.0247741	0	0.0786183	0.0339735	0	265.467
2010-01-05 13:30:00	NA	NA	9	NA	NA	9	912.697	0.389608	0	NA	NA	9	NA	NA	9	3.07266	0.0485713	0	NA	NA	9	NA	NA	9	3.84311	0.00467588	0	NA	NA	9	42.7451	0.0519592	0	NA	NA	9	-0.0616232	0.0304947	0	NA	NA	9	0.00256486	0.0194191	0	0.065037	0.0296812	0	267.513
2010-01-05 14:30:00	NA	NA	9	NA	NA	9	912.119	0.306931	0	NA	NA	9	NA	NA	9	3.07494	0.0327318	0	NA	NA	9	NA	NA	9	3.84259	0.00386446	0	NA	NA	9	42.736	0.044146	0	NA	NA	9	-0.0331799	0.0306528	0	NA	NA	9	-0.0392351	0.0292152	0	0.0554222	0.0368993	0	212.76
2010-01-05 15:30:00	NA	NA	9	NA	NA	9	911.6	0.319106	0	NA	NA	9	NA	NA	9	3.0425	0.0387374	0	NA	NA	9	NA	NA	9	3.83963	0.0043291	0	NA	NA	9	42.7421	0.0456803	0	NA	NA	9	0.0418124	0.056299	0	NA	NA	9	0.00798952	0.0361673	0	0.0724666	0.0321938	0	109.531
2010-01-05 16:30:00	NA	NA	9	NA	NA	9	911.321	0.324473	0	NA	NA	9	NA	NA	9	2.95989	0.0123881	0	NA	NA	9	NA	NA	9	3.83405	0.003583	0	NA	NA	9	42.7815	0.0446033	0	NA	NA	9	0.0551643	0.0276764	0	NA	NA	9	0.0220695	0.0175183	0	0.0614096	0.0288402	0	72.5265
2010-01-05 17:30:00	NA	NA	9	NA	NA	9	910.954	0.320241	0	NA	NA	9	NA	NA	9	2.95588	0.0118307	0	NA	NA	9	NA	NA	9	3.83344	0.00307243	0	NA	NA	9	42.7794	0.039333	0	NA	NA	9	0.00819996	0.0121564	0	NA	NA	9	-0.024951	0.0115738	0	0.0297828	0.00918678	0	155.954
2010-01-05 18:30:00	NA	NA	9	NA	NA	9	911.026	0.344215	0	NA	NA	9	NA	NA	9	2.95546	0.0140361	0	NA	NA	9	NA	NA	9	3.83288	0.00348889	0	NA	NA	9	42.7729	0.0470882	0	NA	NA	9	0.0299588	0.0106794	0	NA	NA	9	-0.000899719	0.0122013	0	0.0327352	0.0094645	0	96.5309
2010-01-05 19:30:00	NA	NA	9	NA	NA	9	911.307	0.354439	0	NA	NA	9	NA	NA	9	2.94281	0.0111231	0	NA	NA	9	NA	NA	9	3.83192	0.003232	0	NA	NA	9	42.7774	0.0426997	0	NA	NA	9	-0.00150104	0.0198769	0	NA	NA	9	-0.0140269	0.012336	0	0.0242734	0.0125244	0	156.313
2010-01-05 20:30:00	NA	NA	9	NA	NA	9	911.897	0.352079	0	NA	NA	9	NA	NA	9	2.91619	0.0207694	0	NA	NA	9	NA	NA	9	3.82967	0.00338166	0	NA	NA	9	42.784	0.0408048	0	NA	NA	9	-0.0428849	0.0275386	0	NA	NA	9	0.00538194	0.0177276	0	0.0472661	0.0265789	0	268.372
2010-01-05 21:30:00	NA	NA	9	NA	NA	9	912.408	0.378269	0	NA	NA	9	NA	NA	9	2.89999	0.0227904	0	NA	NA	9	NA	NA	9	3.82873	0.00284978	0	NA	NA	9	42.7933	0.0399587	0	NA	NA	9	-0.0630087	0.0230998	0	NA	NA	9	-0.0262587	0.0198105	0	0.0706504	0.0243722	0	247.062
2010-01-05 22:30:00	NA	NA	9	NA	NA	9	912.731	0.313416	0	NA	NA	9	NA	NA	9	2.96882	0.016661	0	NA	NA	9	NA	NA	9	3.83412	0.00326721	0	NA	NA	9	42.7697	0.042992	0	NA	NA	9	-0.0349085	0.0238308	0	NA	NA	9	-0.0133166	0.0202103	0	0.041936	0.0247684	0	244.014
2010-01-05 23:30:00	NA	NA	9	NA	NA	9	912.75	0.29159	0	NA	NA	9	NA	NA	9	3.02363	0.0245879	0	NA	NA	9	NA	NA	9	3.83921	0.00362253	0	NA	NA	9	42.761	0.0450318	0	NA	NA	9	-0.0842327	0.0352508	0	NA	NA	9	-0.0106216	0.0173138	0	0.0870961	0.0341235	0	260.406
2010-01-06 00:30:00	NA	NA	9	NA	NA	9	912.503	0.285144	0	NA	NA	9	NA	NA	9	3.1274	0.027088	0	NA	NA	9	NA	NA	9	3.84557	0.0037139	0	NA	NA	9	42.7038	0.0420428	0	NA	NA	9	-0.0531833	0.0264365	0	NA	NA	9	0.00294725	0.017049	0	0.0567205	0.0246837	0	265.867
2010-01-06 01:30:00	NA	NA	9	NA	NA	9	912.166	0.328388	0	NA	NA	9	NA	NA	9	3.11957	0.0337573	0	NA	NA	9	NA	NA	9	3.84449	0.00408411	0	NA	NA	9	42.7008	0.0464554	0	NA	NA	9	0.00120747	0.028804	0	NA	NA	9	-0.0052922	0.0189584	0	0.0316178	0.0147761	0	157.942
2010-01-06 02:30:00	NA	NA	9	NA	NA	9	911.751	0.339908	0	NA	NA	9	NA	NA	9	3.04068	0.0120845	0	NA	NA	9	NA	NA	9	3.83937	0.00362324	0	NA	NA	9	42.7411	0.0467474	0	NA	NA	9	0.0408309	0.0131186	0	NA	NA	9	0.046102	0.0197194	0	0.0626901	0.0205765	0	43.4001
2010-01-06 03:30:00	NA	NA	9	NA	NA	9	911.087	0.365204	0	NA	NA	9	NA	NA	9	3.06801	0.0160613	0	NA	NA	9	NA	NA	9	3.84232	0.00311896	0	NA	NA	9	42.7424	0.0392114	0	NA	NA	9	0.034267	0.00783445	0	NA	NA	9	0.0249721	0.0130571	0	0.0438162	0.0104773	0	55.7049
2010-01-06 04:30:00	NA	NA	9	NA	NA	9	910.686	0.311457	0	NA	NA	9	NA	NA	9	2.98184	0.0717269	0	NA	NA	9	NA	NA	9	3.8359	0.00591636	0	NA	NA	9	42.7761	0.0489385	0	NA	NA	9	0.0870965	0.0300359	0	NA	NA	9	0.0150311	0.0158859	0	0.0897845	0.0300807	0	79.1679
2010-01-06 05:30:00	NA	NA	9	NA	NA	9	910.657	0.335039	0	NA	NA	9	NA	NA	9	2.84534	0.0396482	0	NA	NA	9	NA	NA	9	3.82622	0.00464159	0	NA	NA	9	42.8353	0.0390328	0	NA	NA	9	0.100124	0.0248409	0	NA	NA	9	-0.0127873	0.0172324	0	0.102323	0.025144	0	97.4397
2010-01-06 06:30:00	NA	NA	9	NA	NA	9	910.798	0.311904	0	NA	NA	9	NA	NA	9	2.80151	0.0168573	0	NA	NA	9	NA	NA	9	3.82216	0.00329608	0	NA	NA	9	42.8423	0.0404157	0	NA	NA	9	0.0178576	0.0193131	0	NA	NA	9	-0.0306916	0.0150838	0	0.0411552	0.0129381	0	150.394
2010-01-06 07:30:00	NA	NA	9	NA	NA	9	911.046	0.342921	0	NA	NA	9	NA	NA	9	2.84665	0.0208452	0	NA	NA	9	NA	NA	9	3.82634	0.00382905	0	NA	NA	9	42.8348	0.044327	0	NA	NA	9	-0.00154415	0.00753468	0	NA	NA	9	-0.0147987	0.00696609	0	0.0166646	0.00699591	0	185.445
2010-01-06 08:30:00	NA	NA	9	NA	NA	9	911.506	0.371115	0	NA	NA	9	NA	NA	9	2.89731	0.017915	0	NA	NA	9	NA	NA	9	3.82924	0.00317307	0	NA	NA	9	42.8039	0.0459539	0	NA	NA	9	-0.00130308	0.00596111	0	NA	NA	9	0.015526	0.0121623	0	0.0193291	0.00724734	0	237.84
2010-01-06 09:30:00	NA	NA	9	NA	NA	9	911.944	0.302407	0	NA	NA	9	NA	NA	9	2.86078	0.0354492	0	NA	NA	9	NA	NA	9	3.82639	0.00365947	0	NA	NA	9	42.8162	0.0452458	0	NA	NA	9	-0.043949	0.0287774	0	NA	NA	9	0.0163946	0.0186589	0	0.0513137	0.0272627	0	285.558
2010-01-06 10:30:00	NA	NA	9	NA	NA	9	912.394	0.35323	0	NA	NA	9	NA	NA	9	2.88669	0.0183116	0	NA	NA	9	NA	NA	9	3.82865	0.00381867	0	NA	NA	9	42.8099	0.0454246	0	NA	NA	9	-0.031836	0.00886299	0	NA	NA	9	0.000656207	0.00704129	0	0.0326395	0.00875951	0	269.202
2010-01-06 11:30:00	NA	NA	9	NA	NA	9	912.641	0.324646	0	NA	NA	9	NA	NA	9	2.89042	0.0194058	0	NA	NA	9	NA	NA	9	3.82948	0.00301988	0	NA	NA	9	42.8152	0.0387677	0	NA	NA	9	-0.0647686	0.0304231	0	NA	NA	9	0.0156854	0.020823	0	0.0686872	0.0328951	0	279.215
2010-01-06 12:30:00	NA	NA	9	NA	NA	9	912.638	0.313623	0	NA	NA	9	NA	NA	9	2.94969	0.0179947	0	NA	NA	9	NA	NA	9	3.83525	0.00358515	0	NA	NA	9	42.8092	0.0436255	0	NA	NA	9	-0.0793744	0.0292065	0	NA	NA	9	0.0343799	0.020183	0	0.0875116	0.032928	0	291.445
2010-01-06 13:30:00	NA	NA	9	NA	NA	9	912.566	0.337493	0	NA	NA	9	NA	NA	9	2.92346	0.0239108	0	NA	NA	9	NA	NA	9	3.83258	0.00368721	0	NA	NA	9	42.8104	0.0446812	0	NA	NA	9	-0.119577	0.0422394	0	NA	NA	9	0.0516012	0.0235572	0	0.131139	0.0458573	0	292.475
2010-01-06 14:30:00	NA	NA	9	NA	NA	9	912.143	0.343761	0	NA	NA	9	NA	NA	9	2.95859	0.0147164	0	NA	NA	9	NA	NA	9	3.83611	0.00319028	0	NA	NA	9	42.8085	0.0391205	0	NA	NA	9	-0.128588	0.0408363	0	NA	NA	9	0.0417709	0.0230446	0	0.136329	0.0435046	0	287.071
2010-01-06 15:30:00	NA	NA	9	NA	NA	9	911.484	0.347861	0	NA	NA	9	NA	NA	9	3.02943	0.0265457	0	NA	NA	9	NA	NA	9	3.84176	0.00343124	0	NA	NA	9	42.786	0.0419456	0	NA	NA	9	-0.0923886	0.0281156	0	NA	NA	9	0.0222427	0.0251967	0	0.0977333	0.0300607	0	280.418
2010-01-06 16:30:00	NA	NA	9	NA	NA	9	911.418	0.35493	0	NA	NA	9	NA	NA	9	3.04643	0.0229979	0	NA	NA	9	NA	NA	9	3.8408	0.00383204	0	NA	NA	9	42.7516	0.04773	0	NA	NA	9	-0.00494551	0.0156338	0	NA	NA	9	0.0125321	0.0256735	0	0.0274937	0.0181338	0	178.209
2010-01-06 17:30:00	NA	NA	9	NA	NA	9	910.952	0.302107	0	NA	NA	9	NA	NA	9	3.03738	0.016211	0	NA	NA	9	NA	NA	9	3.84043	0.00332257	0	NA	NA	9	42.7593	0.0427356	0	NA	NA	9	0.0233608	0.017515	0	NA	NA	9	0.0459489	0.0212239	0	0.0545639	0.0209011	0	61.3003
2010-01-06 18:30:00	NA	NA	9	NA	NA	9	910.841	0.307514	0	NA	NA	9	NA	NA	9	2.98211	0.0251397	0	NA	NA	9	NA	NA	9	3.83687	0.00347522	0	NA	NA	9	42.7878	0.0433391	0	NA	NA	9	0.0507974	0.0333536	0	NA	NA	9	0.0368081	0.0120589	0	0.0665818	0.0275625	0	48.61
2010-01-06 19:30:00	NA	NA	9	NA	NA	9	911.068	0.316994	0	NA	NA	9	NA	NA	9	2.90578	0.0237658	0	NA	NA	9	NA	NA	9	3.83112	0.00351687	0	NA	NA	9	42.8165	0.0415056	0	NA	NA	9	0.0876813	0.0230714	0	NA	NA	9	0.0354487	0.0151019	0	0.0963096	0.0207181	0	67.1194
2010-01-06 20:30:00	NA	NA	9	NA	NA	9	911.342	0.315425	0	NA	NA	9	NA	NA	9	2.80347	0.0223267	0	NA	NA	9	NA	NA	9	3.82327	0.00375926	0	NA	NA	9	42.8533	0.0437774	0	NA	NA	9	-0.0167926	0.0390544	0	NA	NA	9	0.00120795	0.0217641	0	0.0412919	0.0240117	0	175.635
2010-01-06 21:30:00	NA	NA	9	NA	NA	9	911.786	0.311927	0	NA	NA	9	NA	NA	9	2.85453	0.036247	0	NA	NA	9	NA	NA	9	3.82756	0.00419925	0	NA	NA	9	42.8392	0.0441619	0	NA	NA	9	-0.0547099	0.0210243	0	NA	NA	9	-0.0237869	0.0116956	0	0.0612217	0.0197384	0	244.713
2010-01-06 22:30:00	NA	NA	9	NA	NA	9	912.002	0.337412	0	NA	NA	9	NA	NA	9	2.92233	0.0136123	0	NA	NA	9	NA	NA	9	3.83265	0.00304236	0	NA	NA	9	42.8132	0.0393158	0	NA	NA	9	-0.0540509	0.0328503	0	NA	NA	9	-0.0247405	0.0137582	0	0.0628296	0.0292273	0	237.809
2010-01-06 23:30:00	NA	NA	9	NA	NA	9	912.423	0.364651	0	NA	NA	9	NA	NA	9	2.86876	0.0184884	0	NA	NA	9	NA	NA	9	3.82784	0.00355265	0	NA	NA	9	42.8236	0.0459683	0	NA	NA	9	-0.00347618	0.00992766	0	NA	NA	9	0.0105249	0.0096157	0	0.0162116	0.00714029	0	177.608
2010-01-07 00:30:00	NA	NA	9	NA	NA	9	912.555	0.320116	0	NA	NA	9	NA	NA	9	2.89166	0.0147664	0	NA	NA	9	NA	NA	9	3.83021	0.00361471	0	NA	NA	9	42.8228	0.0466612	0	NA	NA	9	-0.0105416	0.0147956	0	NA	NA	9	-0.00947822	0.0143982	0	0.0233326	0.00908721	0	230.128
2010-01-07 01:30:00	NA	NA	9	NA	NA	9	912.496	0.326776	0	NA	NA	9	NA	NA	9	2.88322	0.0155346	0	NA	NA	9	NA	NA	9	3.82976	0.0032254	0	NA	NA	9	42.8284	0.0409617	0	NA	NA	9	-0.000974215	0.0152897	0	NA	NA	9	-0.0256586	0.0111583	0	0.0311263	0.00696974	0	186.267
2010-01-07 02:30:00	NA	NA	9	NA	NA	9	912.163	0.323318	0	NA	NA	9	NA	NA	9	2.92307	0.0337129	0	NA	NA	9	NA	NA	9	3.83267	0.00412492	0	NA	NA	9	42.8123	0.0476626	0	NA	NA	9	-0.00229785	0.0115777	0	NA	NA	9	-0.0211323	0.0210665	0	0.0281458	0.0154051	0	202.476
2010-01-07 03:30:00	NA	NA	9	NA	NA	9	911.743	0.324189	0	NA	NA	9	NA	NA	9	2.93324	0.0226952	0	NA	NA	9	NA	NA	9	3.83356	0.00385372	0	NA	NA	9	42.8103	0.0452562	0	NA	NA	9	-0.00487042	0.0153708	0	NA	NA	9	-0.0372168	0.0100288	0	0.0408808	0.00861797	0	189.307
2010-01-07 04:30:00	NA	NA	9	NA	NA	9	911.188	0.41007	0	NA	NA	9	NA	NA	9	3.00866	0.032039	0	NA	NA	9	NA	NA	9	3.8388	0.00407826	0	NA	NA	9	42.7765	0.0402333	0	NA	NA	9	-0.0360856	0.0152947	0	NA	NA	9	-0.0242401	0.0131598	0	0.0459917	0.013472	0	234.411
2010-01-07 05:30:00	NA	NA	9	NA	NA	9	910.725	0.349776	0	NA	NA	9	NA	NA	9	3.05723	0.0250521	0	NA	NA	9	NA	NA	9	3.84266	0.00377608	0	NA	NA	9	42.761	0.0413952	0	NA	NA	9	0.00727715	0.0209914	0	NA	NA	9	-0.0401516	0.0214433	0	0.0467563	0.0194712	0	163.839
2010-01-07 06:30:00	NA	NA	9	NA	NA	9	910.75	0.339866	0	NA	NA	9	NA	NA	9	2.95683	0.0629786	0	NA	NA	9	NA	NA	9	3.83428	0.00526975	0	NA	NA	9	42.7887	0.0556665	0	NA	NA	9	0.0489275	0.0241598	0	NA	NA	9	0.0376372	0.0231426	0	0.0638771	0.0291427	0	57.8286
2010-01-07 07:30:00	NA	NA	9	NA	NA	9	910.866	0.343194	0	NA	NA	9	NA	NA	9	2.90366	0.0436135	0	NA	NA	9	NA	NA	9	3.8307	0.00439589	0	NA	NA	9	42.8142	0.0477754	0	NA	NA	9	0.0435084	0.0231154	0	NA	NA	9	0.0112775	0.0178483	0	0.0473231	0.0251684	0	84.1553
2010-01-07 08:30:00	NA	NA	9	NA	NA	9	911.31	0.360489	0	NA	NA	9	NA	NA	9	2.82222	0.0163432	0	NA	NA	9	NA	NA	9	3.82449	0.00329796	0	NA	NA	9	42.8437	0.0430201	0	NA	NA	9	0.0154081	0.015315	0	NA	NA	9	-0.0128645	0.0111092	0	0.0259403	0.00937111	0	137.219
2010-01-07 09:30:00	NA	NA	9	NA	NA	9	911.906	0.434961	0	NA	NA	9	NA	NA	9	2.82713	0.0176943	0	NA	NA	9	NA	NA	9	3.82507	0.00309864	0	NA	NA	9	42.8443	0.0417142	0	NA	NA	9	-0.0140862	0.0259521	0	NA	NA	9	-0.0382312	0.0175527	0	0.0452818	0.0243103	0	190.458
2010-01-07 10:30:00	NA	NA	9	NA	NA	9	912.604	0.325432	0	NA	NA	9	NA	NA	9	2.83205	0.0218303	0	NA	NA	9	NA	NA	9	3.82623	0.00355225	0	NA	NA	9	42.8518	0.0396511	0	NA	NA	9	-0.0816393	0.0295453	0	NA	NA	9	-0.0587564	0.0218876	0	0.103185	0.0286675	0	233.153
2010-01-07 11:30:00	NA	NA	9	NA	NA	9	913.086	0.299551	0	NA	NA	9	NA	NA	9	2.88475	0.0269218	0	NA	NA	9	NA	NA	9	3.82991	0.00341218	0	NA	NA	9	42.8279	0.0365152	0	NA	NA	9	-0.0667187	0.0323582	0	NA	NA	9	-0.0694374	0.0296093	0	0.10224	0.0272577	0	223.368
2010-01-07 12:30:00	NA	NA	9	NA	NA	9	913.269	0.301229	0	NA	NA	9	NA	NA	9	2.96979	0.0447109	0	NA	NA	9	NA	NA	9	3.83643	0.00475485	0	NA	NA	9	42.797	0.0432536	0	NA	NA	9	-0.0522978	0.0247062	0	NA	NA	9	-0.104129	0.0262239	0	0.118393	0.029306	0	206.01
2010-01-07 13:30:00	NA	NA	9	NA	NA	9	913.216	0.333465	0	NA	NA	9	NA	NA	9	3.05378	0.0245075	0	NA	NA	9	NA	NA	9	3.84291	0.00343697	0	NA	NA	9	42.7671	0.0435565	0	NA	NA	9	-0.0663202	0.0242644	0	NA	NA	9	-0.0599142	0.0191136	0	0.0917736	0.0227937	0	226.925
2010-01-07 14:30:00	NA	NA	9	NA	NA	9	913.021	0.318252	0	NA	NA	9	NA	NA	9	3.06746	0.0136236	0	NA	NA	9	NA	NA	9	3.84262	0.00304901	0	NA	NA	9	42.7457	0.040262	0	NA	NA	9	-0.0582382	0.0273277	0	NA	NA	9	-0.0548135	0.028991	0	0.0827221	0.0337683	0	226.052
2010-01-07 15:30:00	NA	NA	9	NA	NA	9	912.623	0.33972	0	NA	NA	9	NA	NA	9	3.07259	0.02039	0	NA	NA	9	NA	NA	9	3.84238	0.00324102	0	NA	NA	9	42.7361	0.0419642	0	NA	NA	9	0.0071864	0.0215528	0	NA	NA	9	-0.00445765	0.0206966	0	0.0281184	0.0131659	0	150.859
2010-01-07 16:30:00	NA	NA	9	NA	NA	9	912.017	0.361389	0	NA	NA	9	NA	NA	9	3.08693	0.0187714	0	NA	NA	9	NA	NA	9	3.8434	0.00316084	0	NA	NA	9	42.7303	0.0435417	0	NA	NA	9	-0.0104351	0.0165976	0	NA	NA	9	0.00879875	0.0410964	0	0.0394981	0.0242867	0	207.63
2010-01-07 17:30:00	NA	NA	9	NA	NA	9	911.555	0.302485	0	NA	NA	9	NA	NA	9	3.03902	0.0243409	0	NA	NA	9	NA	NA	9	3.8409	0.00356139	0	NA	NA	9	42.7625	0.0447822	0	NA	NA	9	0.033102	0.0198907	0	NA	NA	9	0.0536617	0.0269919	0	0.0681587	0.0212967	0	53.9065
2010-01-07 18:30:00	NA	NA	9	NA	NA	9	911.342	0.339207	0	NA	NA	9	NA	NA	9	2.90902	0.0415893	0	NA	NA	9	NA	NA	9	3.83095	0.00395318	0	NA	NA	9	42.8099	0.0434012	0	NA	NA	9	0.0495789	0.0236755	0	NA	NA	9	0.0444101	0.0192796	0	0.0684159	0.0261091	0	51.5867
2010-01-07 19:30:00	NA	NA	9	NA	NA	9	911.169	0.298638	0	NA	NA	9	NA	NA	9	2.87881	0.011135	0	NA	NA	9	NA	NA	9	3.82934	0.00337016	0	NA	NA	9	42.8298	0.0435217	0	NA	NA	9	-0.00244924	0.00520923	0	NA	NA	9	-0.00626257	0.0198912	0	0.0186239	0.011	0	178.213
2010-01-07 20:30:00	NA	NA	9	NA	NA	9	911.102	0.335643	0	NA	NA	9	NA	NA	9	2.90661	0.0154086	0	NA	NA	9	NA	NA	9	3.83077	0.00351537	0	NA	NA	9	42.811	0.0447229	0	NA	NA	9	-0.00630866	0.00712544	0	NA	NA	9	-0.0265589	0.0152495	0	0.0278164	0.0159602	0	189.938
2010-01-07 21:30:00	NA	NA	9	NA	NA	9	911.247	0.289415	0	NA	NA	9	NA	NA	9	2.93751	0.0159949	0	3.89721	0.00348992	1	NA	NA	9	3.83373	0.00331441	0	NA	NA	9	42.807	0.041636	0	NA	NA	9	-0.0244748	0.0215867	0	NA	NA	9	-0.0467945	0.0233417	0	0.0543942	0.0289955	0	204.485
2010-01-07 22:30:00	NA	NA	9	NA	NA	9	911.583	0.315112	0	NA	NA	9	NA	NA	9	2.915	0.0260563	0	3.94112	0.0263029	1	NA	NA	9	3.83203	0.00350411	0	NA	NA	9	42.8153	0.042085	0	NA	NA	9	-0.0624267	0.0261315	0	NA	NA	9	-0.05682	0.032014	0	0.0869007	0.0357964	0	228.714
2010-01-07 23:30:00	NA	NA	9	NA	NA	9	911.905	0.325222	0	NA	NA	9	NA	NA	9	2.94287	0.0358467	0	3.95452	0.013708	1	NA	NA	9	3.83401	0.0036935	0	NA	NA	9	42.8032	0.0448869	0	NA	NA	9	-0.0583279	0.0325544	0	NA	NA	9	-0.0351015	0.0254098	0	0.0722157	0.0335304	0	235.928
2010-01-08 00:30:00	NA	NA	9	NA	NA	9	912.069	0.294375	0	NA	NA	9	NA	NA	9	3.0183	0.0496827	0	3.98143	0.0103579	1	NA	NA	9	3.84006	0.00499827	0	NA	NA	9	42.7791	0.0506471	0	NA	NA	9	-0.0326391	0.0212425	0	NA	NA	9	-0.0253527	0.0125711	0	0.0437623	0.0200522	0	226.62
2010-01-08 01:30:00	NA	NA	9	NA	NA	9	912.187	0.296988	0	NA	NA	9	NA	NA	9	3.05609	0.0235183	0	3.99967	0.0066551	1	NA	NA	9	3.84102	0.00385094	0	NA	NA	9	42.7411	0.0451921	0	NA	NA	9	0.00126452	0.0196397	0	NA	NA	9	-0.0202571	0.0166315	0	0.0300883	0.0129882	0	173.161
2010-01-08 02:30:00	NA	NA	9	NA	NA	9	912.365	0.309904	0	NA	NA	9	NA	NA	9	2.96211	0.0306133	0	4.08212	0.0351907	1	NA	NA	9	3.83583	0.00360932	0	NA	NA	9	42.8002	0.048712	0	NA	NA	9	0.00482145	0.00901683	0	NA	NA	9	0.0185747	0.0105927	0	0.0227464	0.00665521	0	145.719
2010-01-08 03:30:00	NA	NA	9	NA	NA	9	912.218	0.319848	0	NA	NA	9	NA	NA	9	2.96053	0.0182533	0	3.92573	0.0748757	1	NA	NA	9	3.83605	0.00364848	0	NA	NA	9	42.8051	0.048402	0	NA	NA	9	0.00989895	0.0173789	0	NA	NA	9	0.00524801	0.00528982	0	0.0194299	0.00882477	0	170.919
2010-01-08 04:30:00	NA	NA	9	NA	NA	9	911.871	0.345158	0	NA	NA	9	NA	NA	9	2.96968	0.0180285	0	3.95154	0.024143	1	NA	NA	9	3.8351	0.00375938	0	NA	NA	9	42.7814	0.0489098	0	NA	NA	9	0.00417797	0.0101093	0	NA	NA	9	-0.0139035	0.00452552	0	0.0179319	0.00343916	0	162.641
2010-01-08 05:30:00	NA	NA	9	NA	NA	9	911.599	0.328258	0	NA	NA	9	NA	NA	9	2.94999	0.0215169	0	3.96059	0.00517083	1	NA	NA	9	3.8338	0.00364862	0	NA	NA	9	42.7913	0.0439	0	NA	NA	9	0.024643	0.00739572	0	NA	NA	9	0.00796972	0.0156771	0	0.0293989	0.0103374	0	79.2852
2010-01-08 06:30:00	NA	NA	9	NA	NA	9	911.449	0.310352	0	NA	NA	9	NA	NA	9	2.90197	0.0206998	0	3.93686	0.0172848	1	NA	NA	9	3.83055	0.00332096	0	NA	NA	9	42.8142	0.0457254	0	NA	NA	9	0.0330343	0.0106336	0	NA	NA	9	0.0167437	0.00944084	0	0.038201	0.0106982	0	63.0988
2010-01-08 07:30:00	NA	NA	9	NA	NA	9	911.375	0.306547	0	NA	NA	9	NA	NA	9	2.86655	0.0103167	0	3.88444	0.0221583	1	NA	NA	9	3.82872	0.00348369	0	NA	NA	9	42.8382	0.0462292	0	NA	NA	9	0.0130752	0.00593061	0	NA	NA	9	-0.00135275	0.00803593	0	0.0154314	0.00586284	0	103.33
2010-01-08 08:30:00	NA	NA	9	NA	NA	9	911.469	0.306265	0	NA	NA	9	NA	NA	9	2.86307	0.0102852	0	3.86262	0.0195528	1	NA	NA	9	3.82771	0.00331031	0	NA	NA	9	42.83	0.043522	0	NA	NA	9	0.00207653	0.0116238	0	NA	NA	9	-0.0161836	0.0158218	0	0.0237049	0.00946438	0	158.513
2010-01-08 09:30:00	NA	NA	9	NA	NA	9	911.817	0.322861	0	NA	NA	9	NA	NA	9	2.87579	0.0137811	0	3.835	0.0150118	1	NA	NA	9	3.82881	0.00303392	0	NA	NA	9	42.8267	0.0443406	0	NA	NA	9	-0.00475613	0.0137075	0	NA	NA	9	-0.0489963	0.0122159	0	0.0512101	0.0117389	0	187.332
2010-01-08 10:30:00	NA	NA	9	NA	NA	9	912.072	0.323547	0	NA	NA	9	NA	NA	9	2.95371	0.0584315	0	3.76468	0.0397125	1	NA	NA	9	3.83487	0.00526131	0	NA	NA	9	42.7995	0.0497628	0	NA	NA	9	-0.0149157	0.0271069	0	NA	NA	9	-0.0394174	0.025639	0	0.0505122	0.0248282	0	200.652
2010-01-08 11:30:00	NA	NA	9	NA	NA	9	912.678	0.381098	0	NA	NA	9	NA	NA	9	2.8949	0.0275574	0	3.77709	0.0136895	1	NA	NA	9	3.8315	0.00351937	0	NA	NA	9	42.8346	0.046914	0	NA	NA	9	-0.0908581	0.0357867	0	NA	NA	9	-0.0515766	0.0270008	0	0.107465	0.0370948	0	239.692
2010-01-08 12:30:00	NA	NA	9	NA	NA	9	913.142	0.320138	0	NA	NA	9	NA	NA	9	2.87862	0.0167587	0	3.84576	0.0272505	1	NA	NA	9	3.83114	0.00324899	0	NA	NA	9	42.8514	0.0412322	0	NA	NA	9	-0.123562	0.0330794	0	NA	NA	9	-0.0883451	0.0307223	0	0.154049	0.037133	0	234.402
2010-01-08 13:30:00	NA	NA	9	NA	NA	9	913.352	0.331213	0	NA	NA	9	NA	NA	9	2.91897	0.0195531	0	3.91944	0.027995	1	NA	NA	9	3.83432	0.00350417	0	NA	NA	9	42.8377	0.0453264	0	NA	NA	9	-0.126508	0.0395081	0	NA	NA	9	-0.0843403	0.0338942	0	0.154929	0.0427048	0	235.995
2010-01-08 14:30:00	NA	NA	9	NA	NA	9	913.395	0.301722	0	NA	NA	9	NA	NA	9	2.93624	0.0194706	0	3.98648	0.0229447	1	NA	NA	9	3.83365	0.00327565	0	NA	NA	9	42.8064	0.0429299	0	NA	NA	9	-0.0453474	0.0413613	0	NA	NA	9	-0.0247771	0.0463206	0	0.0682215	0.0432593	0	238.719
2010-01-08 15:30:00	NA	NA	9	NA	NA	9	913.151	0.337417	0	NA	NA	9	NA	NA	9	2.94186	0.0202138	0	4.06456	0.0338032	1	NA	NA	9	3.8342	0.00326536	0	NA	NA	9	42.806	0.0429185	0	NA	NA	9	0.00487476	0.0132881	0	NA	NA	9	9.43063e-05	0.0124664	0	0.016393	0.00932143	0	159.239
2010-01-08 16:30:00	NA	NA	9	NA	NA	9	912.683	0.370193	0	NA	NA	9	NA	NA	9	2.96517	0.0126207	0	4.04087	0.0859796	1	NA	NA	9	3.83586	0.00321661	0	NA	NA	9	42.7963	0.0413212	0	NA	NA	9	0.00252967	0.00878553	0	NA	NA	9	-0.0124602	0.0103414	0	0.0172194	0.00701476	0	156.605
2010-01-08 17:30:00	NA	NA	9	NA	NA	9	912.293	0.336215	0	NA	NA	9	NA	NA	9	2.93757	0.0233504	0	3.7792	0.0492517	1	NA	NA	9	3.83385	0.00370522	0	NA	NA	9	42.8079	0.0444615	0	NA	NA	9	0.0389155	0.0187747	0	NA	NA	9	0.0230937	0.0252567	0	0.0490151	0.025208	0	68.7452
2010-01-08 18:30:00	NA	NA	9	NA	NA	9	911.798	0.343649	0	NA	NA	9	NA	NA	9	2.92489	0.0156137	0	3.89811	0.0496126	1	NA	NA	9	3.83332	0.0036502	0	NA	NA	9	42.8184	0.0455281	0	NA	NA	9	-0.00494755	0.011146	0	NA	NA	9	-0.00506494	0.018933	0	0.0205327	0.0105369	0	180.99
2010-01-08 19:30:00	NA	NA	9	NA	NA	9	911.395	0.306666	0	NA	NA	9	NA	NA	9	2.91436	0.0753722	0	3.79904	0.0632989	1	NA	NA	9	3.83215	0.0068587	0	NA	NA	9	42.8178	0.0472481	0	NA	NA	9	0.0435687	0.0299836	0	NA	NA	9	0.0313455	0.0281728	0	0.0564641	0.0372172	0	73.8893
2010-01-08 20:30:00	NA	NA	9	NA	NA	9	911.332	0.3115	0	NA	NA	9	NA	NA	9	2.75511	0.0127659	0	3.78259	0.0282747	1	NA	NA	9	3.82027	0.00335962	0	NA	NA	9	42.8798	0.0447915	0	NA	NA	9	0.0339965	0.0306381	0	NA	NA	9	0.00581137	0.0350147	0	0.0510547	0.0273292	0	102.293
2010-01-08 21:30:00	NA	NA	9	NA	NA	9	911.252	0.324411	0	NA	NA	9	NA	NA	9	2.77712	0.0224103	0	3.79892	0.0117013	1	NA	NA	9	3.82176	0.00358738	0	NA	NA	9	42.8694	0.0463033	0	NA	NA	9	-0.0242977	0.0102028	0	NA	NA	9	-0.0441657	0.0165664	0	0.0515427	0.0162118	0	210.102
2010-01-08 22:30:00	NA	NA	9	NA	NA	9	911.288	0.317492	0	NA	NA	9	NA	NA	9	2.80254	0.0244687	0	3.75945	0.00663479	1	NA	NA	9	3.82351	0.0035604	0	NA	NA	9	42.8576	0.041402	0	NA	NA	9	-0.0576945	0.0389673	0	NA	NA	9	-0.0568838	0.0274041	0	0.0844348	0.0412832	0	217.516
2010-01-08 23:30:00	NA	NA	9	NA	NA	9	911.605	0.311694	0	NA	NA	9	NA	NA	9	2.80869	0.029141	0	3.80436	0.032656	1	NA	NA	9	3.82508	0.00419081	0	NA	NA	9	42.869	0.0431651	0	NA	NA	9	-0.0972395	0.0317876	0	NA	NA	9	-0.0651655	0.0256725	0	0.120118	0.0307055	0	235.32
2010-01-09 00:30:00	NA	NA	9	NA	NA	9	911.819	0.319711	0	NA	NA	9	NA	NA	9	2.85574	0.0172868	0	3.85446	0.0110309	1	NA	NA	9	3.82809	0.00322056	0	NA	NA	9	42.8442	0.0409717	0	NA	NA	9	-0.0489676	0.0424168	0	NA	NA	9	-0.099328	0.0300803	0	0.118692	0.0296499	0	204.703
2010-01-09 01:30:00	NA	NA	9	NA	NA	9	912.097	0.334967	0	NA	NA	9	NA	NA	9	2.91898	0.0331681	0	3.90071	0.0285071	1	NA	NA	9	3.83313	0.00417483	0	NA	NA	9	42.8236	0.0395349	0	NA	NA	9	-0.00969486	0.0204683	0	NA	NA	9	-0.0693124	0.0251907	0	0.0728374	0.0254208	0	184.081
2010-01-09 02:30:00	NA	NA	9	NA	NA	9	912.183	0.307445	0	NA	NA	9	NA	NA	9	2.94552	0.0175788	0	3.97919	0.0255344	1	NA	NA	9	3.83475	0.00346725	0	NA	NA	9	42.8087	0.0434757	0	NA	NA	9	0.00561433	0.0168263	0	NA	NA	9	-0.0223825	0.0236338	0	0.0307784	0.0206551	0	149.33
2010-01-09 03:30:00	NA	NA	9	NA	NA	9	912.269	0.335573	0	NA	NA	9	NA	NA	9	2.95186	0.0141984	0	3.93425	0.0893982	1	NA	NA	9	3.83418	0.00350577	0	NA	NA	9	42.7931	0.0437742	0	NA	NA	9	0.0053921	0.00753481	0	NA	NA	9	-0.0329946	0.0122598	0	0.0348646	0.01045	0	166.407
2010-01-09 04:30:00	NA	NA	9	NA	NA	9	912.333	0.334181	0	NA	NA	9	NA	NA	9	2.91777	0.0752059	0	3.8158	0.00728267	1	NA	NA	9	3.83158	0.00661238	0	NA	NA	9	42.8056	0.0549034	0	NA	NA	9	0.0283935	0.0210125	0	NA	NA	9	0.0122622	0.0180721	0	0.0334132	0.0246607	0	78.3843
2010-01-09 05:30:00	NA	NA	9	NA	NA	9	912.355	0.320087	0	NA	NA	9	NA	NA	9	2.80456	0.0128929	0	3.82702	0.0133646	1	NA	NA	9	3.82389	0.00304658	0	NA	NA	9	42.859	0.0392343	0	NA	NA	9	0.0266277	0.0138563	0	NA	NA	9	-0.00203651	0.0331444	0	0.0412786	0.017299	0	103.611
2010-01-09 06:30:00	NA	NA	9	NA	NA	9	912.148	0.313945	0	NA	NA	9	NA	NA	9	2.80448	0.0108173	0	3.8904	0.0114342	1	NA	NA	9	3.82378	0.00291964	0	NA	NA	9	42.8579	0.0397553	0	NA	NA	9	0.0149237	0.0158598	0	NA	NA	9	-0.0264539	0.0145991	0	0.0339527	0.0153063	0	151.771
2010-01-09 07:30:00	NA	NA	9	NA	NA	9	911.909	0.297657	0	NA	NA	9	NA	NA	9	2.811	0.0203581	0	3.77976	0.0659162	1	NA	NA	9	3.82439	0.00355788	0	NA	NA	9	42.8571	0.0457989	0	NA	NA	9	0.0152472	0.0103521	0	NA	NA	9	0.00619992	0.0177272	0	0.0240624	0.010638	0	85.9942
2010-01-09 08:30:00	NA	NA	9	NA	NA	9	911.937	0.30461	0	NA	NA	9	NA	NA	9	2.75371	0.0165376	0	3.74878	0.0252625	1	NA	NA	9	3.81942	0.00323197	0	NA	NA	9	42.8706	0.0400557	0	NA	NA	9	0.026625	0.0150661	0	NA	NA	9	-0.0079094	0.0180395	0	0.0348917	0.0103045	0	113.886
2010-01-09 09:30:00	NA	NA	9	NA	NA	9	911.955	0.315852	0	NA	NA	9	NA	NA	9	2.81215	0.0409	0	3.81656	0.0141442	1	NA	NA	9	3.82495	0.00488805	0	NA	NA	9	42.8625	0.0427251	0	NA	NA	9	-0.0129947	0.0133199	0	NA	NA	9	-0.0515725	0.0180669	0	0.0547595	0.0182679	0	193.421
2010-01-09 10:30:00	NA	NA	9	NA	NA	9	912.064	0.335878	0	NA	NA	9	NA	NA	9	2.86217	0.0185824	0	3.72294	0.0284249	1	NA	NA	9	3.82888	0.00365063	0	NA	NA	9	42.8455	0.0470484	0	NA	NA	9	-0.0131927	0.0090569	0	NA	NA	9	-0.0121288	0.0114259	0	0.0222545	0.00619471	0	229.108
2010-01-09 11:30:00	NA	NA	9	NA	NA	9	912.367	0.355154	0	NA	NA	9	NA	NA	9	2.88527	0.0128762	0	3.72198	0.0236904	1	NA	NA	9	3.83008	0.0033761	0	NA	NA	9	42.8297	0.0428525	0	NA	NA	9	-0.0145409	0.00993307	0	NA	NA	9	-0.00987217	0.011966	0	0.0223036	0.00729352	0	234.482
2010-01-09 12:30:00	NA	NA	9	NA	NA	9	912.811	0.33323	0	NA	NA	9	NA	NA	9	2.84622	0.0149876	0	3.83937	0.0214513	1	NA	NA	9	3.82742	0.00353383	0	NA	NA	9	42.8479	0.0427087	0	NA	NA	9	-0.0281341	0.0264784	0	NA	NA	9	-0.0305374	0.0129642	0	0.0459453	0.0219556	0	212.321
2010-01-09 13:30:00	NA	NA	9	NA	NA	9	913.161	0.291556	0	NA	NA	9	NA	NA	9	2.87889	0.0196679	0	3.87664	0.00279685	1	NA	NA	9	3.83001	0.00309057	0	NA	NA	9	42.8369	0.0416351	0	NA	NA	9	-0.034412	0.014118	0	NA	NA	9	-0.0488079	0.0245206	0	0.0625844	0.0212123	0	217.548
2010-01-09 14:30:00	NA	NA	9	NA	NA	9	913.514	0.384069	0	NA	NA	9	NA	NA	9	2.8304	0.0566192	0	3.88045	0.00468526	1	NA	NA	9	3.82544	0.00530883	0	NA	NA	9	42.8435	0.0469783	0	NA	NA	9	-0.00703786	0.0226239	0	NA	NA	9	0.0252944	0.0453387	0	0.053031	0.0210551	0	161.04
2010-01-09 15:30:00	NA	NA	9	NA	NA	9	913.556	0.336534	0	NA	NA	9	NA	NA	9	2.82336	0.0238623	0	3.86788	0.00395751	1	NA	NA	9	3.82571	0.00358683	0	NA	NA	9	42.8562	0.0451803	0	NA	NA	9	-0.0136734	0.0163059	0	NA	NA	9	-0.00906018	0.0306374	0	0.0352026	0.0152911	0	245.825
2010-01-09 16:30:00	NA	NA	9	NA	NA	9	913.324	0.319536	0	NA	NA	9	NA	NA	9	2.87098	0.0210386	0	3.88141	0.00253852	1	NA	NA	9	3.82908	0.00354142	0	NA	NA	9	42.8355	0.0400787	0	NA	NA	9	-0.0242645	0.0236769	0	NA	NA	9	-0.0506537	0.0215794	0	0.0589874	0.026479	0	199.56
2010-01-09 17:30:00	NA	NA	9	NA	NA	9	912.985	0.35304	0	NA	NA	9	NA	NA	9	2.83753	0.0305908	0	3.79008	0.0361185	1	NA	NA	9	3.82665	0.00382935	0	NA	NA	9	42.8496	0.0436287	0	NA	NA	9	-0.00328098	0.0266595	0	NA	NA	9	-0.00639368	0.0302233	0	0.035756	0.019916	0	167.782
2010-01-09 18:30:00	NA	NA	9	NA	NA	9	912.42	0.386667	0	NA	NA	9	NA	NA	9	2.79521	0.0135341	0	3.89149	0.0365489	1	NA	NA	9	3.82303	0.00328348	0	NA	NA	9	42.8606	0.0426804	0	NA	NA	9	0.0106108	0.00581307	0	NA	NA	9	-0.0255962	0.0152345	0	0.029252	0.0133383	0	151.289
2010-01-09 19:30:00	NA	NA	9	NA	NA	9	911.899	0.356405	0	NA	NA	9	NA	NA	9	2.85552	0.0240219	0	3.96752	0.00906335	1	NA	NA	9	3.82862	0.00390488	0	NA	NA	9	42.8511	0.0448283	0	NA	NA	9	0.00668298	0.0200929	0	NA	NA	9	-0.0609076	0.0361679	0	0.0648945	0.0354216	0	168.467
2010-01-09 20:30:00	NA	NA	9	NA	NA	9	911.23	0.337707	0	NA	NA	9	NA	NA	9	2.93034	0.0428061	0	3.81329	0.0949036	1	NA	NA	9	3.83366	0.00473086	0	NA	NA	9	42.8157	0.0448098	0	NA	NA	9	0.00663361	0.0188878	0	NA	NA	9	-0.0105888	0.0259436	0	0.0301742	0.0165843	0	149.249
2010-01-09 21:30:00	NA	NA	9	NA	NA	9	911.014	0.320515	0	NA	NA	9	NA	NA	9	2.86932	0.0211069	0	3.76424	0.0030966	1	NA	NA	9	3.82971	0.00373886	0	NA	NA	9	42.8471	0.047415	0	NA	NA	9	0.038642	0.0248198	0	NA	NA	9	0.0573994	0.0253075	0	0.0721658	0.028918	0	33.7895
2010-01-09 22:30:00	NA	NA	9	NA	NA	9	910.867	0.304268	0	NA	NA	9	NA	NA	9	2.86413	0.0116229	0	3.79134	0.0113724	1	NA	NA	9	3.82841	0.00339729	0	NA	NA	9	42.8378	0.0437173	0	NA	NA	9	0.0151918	0.0105735	0	NA	NA	9	0.00428328	0.0214956	0	0.0258996	0.0123277	0	99.8437
2010-01-09 23:30:00	NA	NA	9	NA	NA	9	910.798	0.31565	0	NA	NA	9	NA	NA	9	2.87243	0.0162105	0	3.81716	0.00749418	1	NA	NA	9	3.82887	0.00372982	0	NA	NA	9	42.8325	0.0464617	0	NA	NA	9	0.00159045	0.00955745	0	NA	NA	9	-0.0272105	0.0136724	0	0.0291946	0.0129936	0	168.063
2010-01-10 00:30:00	NA	NA	9	NA	NA	9	NA	NA	3	NA	NA	9	NA	NA	9	NA	NA	3	NA	NA	9	NA	NA	9	NA	NA	3	NA	NA	9	NA	NA	3	NA	NA	9	NA	NA	3	NA	NA	9	NA	NA	3	NA	NA	3	NA
2010-01-10 01:30:00	NA	NA	9	NA	NA	9	NA	NA	9	NA	NA	9	NA	NA	9	NA	NA	9	NA	NA	9	NA	NA	9	NA	NA	9	NA	NA	9	NA	NA	9	NA	NA	9	NA	NA	9	NA	NA	9	NA	NA	9	NA	NA	9	NA
2010-01-10 02:30:00	NA	NA	9	NA	NA	9	NA	NA	9	NA	NA	9	NA	NA	9	NA	NA	9	NA	NA	9	NA	NA	9	NA	NA	9	NA	NA	9	NA	NA	9	NA	NA	9	NA	NA	9	NA	NA	9	NA	NA	9	NA	NA	9	NA
2010-01-10 03:30:00	NA	NA	9	NA	NA	9	NA	NA	9	NA	NA	9	NA	NA	9	NA	NA	9	NA	NA	9	NA	NA	9	NA	NA	9	NA	NA	9	NA	NA	9	NA	NA	9	NA	NA	9	NA	NA	9	NA	NA	9	NA	NA	9	NA
2010-01-10 04:30:00	NA	NA	9	NA	NA	9	NA	NA	9	NA	NA	9	NA	NA	9	NA	NA	9	NA	NA	9	NA	NA	9	NA	NA	9	NA	NA	9	NA	NA	9	NA	NA	9	NA	NA	9	NA	NA	9	NA	NA	9	NA	NA	9	NA
2010-01-10 05:30:00	NA	NA	9	NA	NA	9	NA	NA	9	NA	NA	9	NA	NA	9	NA	NA	9	NA	NA	9	NA	NA	9	NA	NA	9	NA	NA	9	NA	NA	9	NA	NA	9	NA	NA	9	NA	NA	9	NA	NA	9	NA	NA	9	NA
2010-01-10 06:30:00	NA	NA	9	NA	NA	9	NA	NA	9	NA	NA	9	NA	NA	9	NA	NA	9	NA	NA	9	NA	NA	9	NA	NA	9	NA	NA	9	NA	NA	9	NA	NA	9	NA	NA	9	NA	NA	9	NA	NA	9	NA	NA	9	NA
2010-01-10 07:30:00	NA	NA	9	NA	NA	9	NA	NA	9	NA	NA	9	NA	NA	9	NA	NA	9	NA	NA	9	NA	NA	9	NA	NA	9	NA	NA	9	NA	NA	9	NA	NA	9	NA	NA	9	NA	NA	9	NA	NA	9	NA	NA	9	NA
2010-01-10 08:30:00	NA	NA	9	NA	NA	9	NA	NA	9	NA	NA	9	NA	NA	9	NA	NA	9	NA	NA	9	NA	NA	9	NA	NA	9	NA	NA	9	NA	NA	9	NA	NA	9	NA	NA	9	NA	NA	9	NA	NA	9	NA	NA	9	NA
2010-01-10 09:30:00	NA	NA	9	NA	NA	9	NA	NA	9	NA	NA	9	NA	NA	9	NA	NA	9	NA	NA	9	NA	NA	9	NA	NA	9	NA	NA	9	NA	NA	9	NA	NA	9	NA	NA	9	NA	NA	9	NA	NA	9	NA	NA	9	NA
2010-01-10 10:30:00	NA	NA	9	NA	NA	9	NA	NA	9	NA	NA	9	NA	NA	9	NA	NA	9	NA	NA	9	NA	NA	9	NA	NA	9	NA	NA	9	NA	NA	9	NA	NA	9	NA	NA	9	NA	NA	9	NA	NA	9	NA	NA	9	NA
2010-01-10 11:30:00	NA	NA	9	NA	NA	9	NA	NA	9	NA	NA	9	NA	NA	9	NA	NA	9	NA	NA	9	NA	NA	9	NA	NA	9	NA	NA	9	NA	NA	9	NA	NA	9	NA	NA	9	NA	NA	9	NA	NA	9	NA	NA	9	NA
2010-01-10 12:30:00	NA	NA	9	NA	NA	9	NA	NA	9	NA	NA	9	NA	NA	9	NA	NA	9	NA	NA	9	NA	NA	9	NA	NA	9	NA	NA	9	NA	NA	9	NA	NA	9	NA	NA	9	NA	NA	9	NA	NA	9	NA	NA	9	NA
2010-01-10 13:30:00	NA	NA	9	NA	NA	9	NA	NA	9	NA	NA	9	NA	NA	9	NA	NA	9	NA	NA	9	NA	NA	9	NA	NA	9	NA	NA	9	NA	NA	9	NA	NA	9	NA	NA	9	NA	NA	9	NA	NA	9	NA	NA	9	NA
2010-01-10 14:30:00	NA	NA	9	NA	NA	9	NA	NA	9	NA	NA	9	NA	NA	9	NA	NA	9	NA	NA	9	NA	NA	9	NA	NA	9	NA	NA	9	NA	NA	9	NA	NA	9	NA	NA	9	NA	NA	9	NA	NA	9	NA	NA	9	NA
2010-01-10 15:30:00	NA	NA	9	NA	NA	9	NA	NA	9	NA	NA	9	NA	NA	9	NA	NA	9	NA	NA	9	NA	NA	9	NA	NA	9	NA	NA	9	NA	NA	9	NA	NA	9	NA	NA	9	NA	NA	9	NA	NA	9	NA	NA	9	NA
2010-01-10 16:30:00	NA	NA	9	NA	NA	9	NA	NA	9	NA	NA	9	NA	NA	9	NA	NA	9	NA	NA	9	NA	NA	9	NA	NA	9	NA	NA	9	NA	NA	9	NA	NA	9	NA	NA	9	NA	NA	9	NA	NA	9	NA	NA	9	NA
2010-01-10 17:30:00	NA	NA	9	NA	NA	9	NA	NA	3	NA	NA	9	NA	NA	9	NA	NA	3	NA	NA	9	NA	NA	9	NA	NA	3	NA	NA	9	NA	NA	3	NA	NA	9	NA	NA	3	NA	NA	9	NA	NA	3	NA	NA	3	NA
2010-01-10 18:30:00	NA	NA	9	NA	NA	9	912.989	0.486443	0	NA	NA	9	NA	NA	9	2.94288	0.0212398	0	NA	NA	9	NA	NA	9	3.79993	0.00611999	0	NA	NA	9	42.3758	0.0933668	0	NA	NA	9	0.001194	0.0189638	0	NA	NA	9	-0.0203481	0.0150029	0	0.0284991	0.0137028	0	166.46
2010-01-10 19:30:00	NA	NA	9	NA	NA	9	912.352	0.370549	0	NA	NA	9	NA	NA	9	2.90704	0.0122345	0	NA	NA	9	NA	NA	9	3.8091	0.00348283	0	NA	NA	9	42.5379	0.0458598	0	NA	NA	9	-0.0255068	0.015869	0	NA	NA	9	-0.0299678	0.0333751	0	0.0439041	0.0314102	0	233.659
2010-01-10 20:30:00	NA	NA	9	NA	NA	9	911.74	0.354454	0	NA	NA	9	NA	NA	9	2.93131	0.0153599	0	NA	NA	9	NA	NA	9	3.81362	0.00290622	0	NA	NA	9	42.563	0.0394451	0	NA	NA	9	0.00548096	0.00775649	0	NA	NA	9	-0.0234744	0.0177553	0	0.0262449	0.01636	0	179.423
2010-01-10 21:30:00	NA	NA	9	NA	NA	9	911.134	0.36586	0	NA	NA	9	NA	NA	9	2.93789	0.0153009	0	NA	NA	9	NA	NA	9	3.81691	0.00331483	0	NA	NA	9	42.5959	0.0408251	0	NA	NA	9	0.00321114	0.00447026	0	NA	NA	9	-0.0148222	0.00773199	0	0.0158196	0.00771385	0	171.038
2010-01-10 22:30:00	NA	NA	9	NA	NA	9	910.782	0.320466	0	NA	NA	9	NA	NA	9	2.92129	0.0427233	0	NA	NA	9	NA	NA	9	3.8173	0.00390709	0	NA	NA	9	42.6229	0.048352	0	NA	NA	9	-0.0163967	0.0237506	0	NA	NA	9	-0.0323364	0.0189252	0	0.041988	0.0217603	0	196.566
2010-01-10 23:30:00	NA	NA	9	NA	NA	9	910.888	0.339148	0	NA	NA	9	NA	NA	9	2.82519	0.0272832	0	NA	NA	9	NA	NA	9	3.81233	0.00372813	0	NA	NA	9	42.6873	0.0415953	0	NA	NA	9	-0.0462494	0.0140424	0	NA	NA	9	-0.0220988	0.0120546	0	0.0527386	0.0137265	0	243.74
2010-01-11 00:30:00	NA	NA	9	NA	NA	9	910.827	0.294085	0	NA	NA	9	NA	NA	9	2.89127	0.0157861	0	NA	NA	9	NA	NA	9	3.81746	0.00329359	0	NA	NA	9	42.6645	0.0417994	0	NA	NA	9	-0.00961266	0.0104922	0	NA	NA	9	-0.0214542	0.0125737	0	0.0265101	0.0108627	0	207.131
2010-01-11 01:30:00	NA	NA	9	NA	NA	9	911.119	0.296091	0	NA	NA	9	NA	NA	9	2.90574	0.0178531	0	NA	NA	9	NA	NA	9	3.82057	0.00301734	0	NA	NA	9	42.6842	0.0348466	0	NA	NA	9	-0.00473003	0.00945616	0	NA	NA	9	-0.0295706	0.0143941	0	0.031546	0.0140781	0	190.261
2010-01-11 02:30:00	NA	NA	9	NA	NA	9	911.355	0.349686	0	NA	NA	9	NA	NA	9	2.99172	0.0258406	0	NA	NA	9	NA	NA	9	3.82729	0.00356709	0	NA	NA	9	42.6549	0.0454414	0	NA	NA	9	-0.00623841	0.0168117	0	NA	NA	9	-0.0331856	0.0284315	0	0.0389853	0.0266669	0	184.446
2010-01-11 03:30:00	NA	NA	9	NA	NA	9	911.734	0.327909	0	NA	NA	9	NA	NA	9	3.01459	0.013385	0	NA	NA	9	NA	NA	9	3.82907	0.00345028	0	NA	NA	9	42.6468	0.0435893	0	NA	NA	9	0.0111415	0.00968409	0	NA	NA	9	-0.00712735	0.00836401	0	0.0162842	0.00857003	0	139.188
2010-01-11 04:30:00	NA	NA	9	NA	NA	9	912.261	0.329442	0	NA	NA	9	NA	NA	9	2.90394	0.0385621	0	NA	NA	9	NA	NA	9	3.8218	0.00385018	0	NA	NA	9	42.7013	0.0465817	0	NA	NA	9	0.0344273	0.014014	0	NA	NA	9	0.0163898	0.0152273	0	0.0403061	0.0160451	0	68.0055
2010-01-11 05:30:00	NA	NA	9	NA	NA	9	912.598	0.367638	0	NA	NA	9	NA	NA	9	2.877	0.00993587	0	NA	NA	9	NA	NA	9	3.82113	0.00318497	0	NA	NA	9	42.7283	0.0413942	0	NA	NA	9	0.00153396	0.0131843	0	NA	NA	9	-0.0285059	0.018659	0	0.0343441	0.0125382	0	163.921
2010-01-11 06:30:00	NA	NA	9	NA	NA	9	912.51	0.318515	0	NA	NA	9	NA	NA	9	2.92812	0.0359228	0	NA	NA	9	NA	NA	9	3.82492	0.00342293	0	NA	NA	9	42.7083	0.0480026	0	NA	NA	9	-0.00423718	0.0106576	0	NA	NA	9	-0.0261983	0.0101785	0	0.0291374	0.00851016	0	193.771
2010-01-11 07:30:00	NA	NA	9	NA	NA	9	912.343	0.284163	0	NA	NA	9	NA	NA	9	2.98677	0.018734	0	NA	NA	9	NA	NA	9	3.83033	0.00302509	0	NA	NA	9	42.6988	0.0380717	0	NA	NA	9	-0.0418422	0.0185366	0	NA	NA	9	-0.0472456	0.0144028	0	0.0651488	0.0170133	0	220.308
2010-01-11 08:30:00	NA	NA	9	NA	NA	9	912.094	0.314107	0	NA	NA	9	NA	NA	9	3.01983	0.0111796	0	NA	NA	9	NA	NA	9	3.8333	0.00291453	0	NA	NA	9	42.6925	0.0382595	0	NA	NA	9	-0.0342788	0.0147131	0	NA	NA	9	-0.052065	0.0129396	0	0.0639312	0.0135055	0	212.882
2010-01-11 09:30:00	NA	NA	9	NA	NA	9	911.977	0.323369	0	NA	NA	9	NA	NA	9	2.95735	0.03938	0	NA	NA	9	NA	NA	9	3.82763	0.003747	0	NA	NA	9	42.704	0.0405932	0	NA	NA	9	-0.00214007	0.0088912	0	NA	NA	9	-0.00329348	0.0151971	0	0.0162893	0.00774277	0	171.293
2010-01-11 10:30:00	NA	NA	9	NA	NA	9	911.732	0.317034	0	NA	NA	9	NA	NA	9	2.98088	0.0119359	0	NA	NA	9	NA	NA	9	3.82954	0.00314664	0	NA	NA	9	42.697	0.0392592	0	NA	NA	9	0.00486063	0.0074181	0	NA	NA	9	-0.013949	0.00697418	0	0.0164406	0.00717948	0	164.359
2010-01-11 11:30:00	NA	NA	9	NA	NA	9	911.841	0.304089	0	NA	NA	9	NA	NA	9	2.98284	0.0109127	0	NA	NA	9	NA	NA	9	3.83001	0.00303109	0	NA	NA	9	42.7002	0.0417943	0	NA	NA	9	-0.00106868	0.0102347	0	NA	NA	9	-0.0344255	0.0111171	0	0.0360963	0.0105636	0	179.907
2010-01-11 12:30:00	NA	NA	9	NA	NA	9	911.861	0.305388	0	NA	NA	9	NA	NA	9	3.00267	0.0132367	0	NA	NA	9	NA	NA	9	3.83118	0.0031308	0	NA	NA	9	42.6888	0.0432064	0	NA	NA	9	0.0147302	0.00695121	0	NA	NA	9	-0.0190547	0.00909516	0	0.026071	0.00559896	0	140.816
2010-01-11 13:30:00	NA	NA	9	NA	NA	9	912.083	0.319306	0	NA	NA	9	NA	NA	9	3.02436	0.0157147	0	NA	NA	9	NA	NA	9	3.83254	0.0034247	0	NA	NA	9	42.6771	0.0435696	0	NA	NA	9	0.014007	0.00352033	0	NA	NA	9	-0.0134965	0.00736622	0	0.0206267	0.00441816	0	131.533
2010-01-11 14:30:00	NA	NA	9	NA	NA	9	912.471	0.327537	0	NA	NA	9	NA	NA	9	3.03995	0.0240864	0	NA	NA	9	NA	NA	9	3.83412	0.00387333	0	NA	NA	9	42.676	0.0427007	0	NA	NA	9	0.0112986	0.00717861	0	NA	NA	9	-0.00162911	0.0100418	0	0.0159038	0.00544823	0	109.343
2010-01-11 15:30:00	NA	NA	9	NA	NA	9	912.828	0.314468	0	NA	NA	9	NA	NA	9	3.03798	0.0219484	0	NA	NA	9	NA	NA	9	3.83427	0.0032019	0	NA	NA	9	42.6803	0.0381404	0	NA	NA	9	0.0130427	0.00676087	0	NA	NA	9	-0.0102291	0.0103596	0	0.019829	0.00587576	0	123.998
2010-01-11 16:30:00	NA	NA	9	NA	NA	9	913.039	0.326845	0	NA	NA	9	NA	NA	9	3.04492	0.0240759	0	NA	NA	9	NA	NA	9	3.83431	0.00330679	0	NA	NA	9	42.6715	0.0395624	0	NA	NA	9	0.0126005	0.00566592	0	NA	NA	9	-0.0172695	0.0031903	0	0.0222046	0.00249477	0	144.628
2010-01-11 17:30:00	NA	NA	9	NA	NA	9	913.029	0.285455	0	NA	NA	9	NA	NA	9	3.06385	0.0206402	0	NA	NA	9	NA	NA	9	3.836	0.00338883	0	NA	NA	9	42.6678	0.042582	0	NA	NA	9	-0.00184149	0.0164939	0	NA	NA	9	-0.025164	0.0201606	0	0.0306962	0.0193051	0	169.463
2010-01-11 18:30:00	NA	NA	9	NA	NA	9	912.871	0.332	0	NA	NA	9	NA	NA	9	3.02897	0.0211061	0	NA	NA	9	NA	NA	9	3.83386	0.00324357	0	NA	NA	9	42.687	0.0394527	0	NA	NA	9	0.00238054	0.0165683	0	NA	NA	9	-0.0161695	0.00981972	0	0.0231535	0.0100908	0	158.855
2010-01-11 19:30:00	NA	NA	9	NA	NA	9	912.582	0.353252	0	NA	NA	9	NA	NA	9	2.99498	0.0157136	0	NA	NA	9	NA	NA	9	3.83286	0.00304413	0	NA	NA	9	42.7195	0.0408522	0	NA	NA	9	0.000959663	0.00630991	0	NA	NA	9	0.0095539	0.00740565	0	0.0119464	0.00664165	0	107.719
2010-01-11 20:30:00	NA	NA	9	NA	NA	9	912.006	0.380439	0	NA	NA	9	NA	NA	9	3.00003	0.0203117	0	NA	NA	9	NA	NA	9	3.83209	0.00329154	0	NA	NA	9	42.7036	0.0439274	0	NA	NA	9	0.00660253	0.00722135	0	NA	NA	9	-0.0156737	0.00783313	0	0.0179128	0.00904871	0	158.503
2010-01-11 21:30:00	NA	NA	9	NA	NA	9	911.294	0.317932	0	NA	NA	9	NA	NA	9	3.00177	0.0154576	0	NA	NA	9	NA	NA	9	3.83288	0.00339392	0	NA	NA	9	42.7116	0.0426403	0	NA	NA	9	-0.00191774	0.0163976	0	NA	NA	9	-0.0130508	0.00633174	0	0.0210847	0.00618541	0	188.157
2010-01-11 22:30:00	NA	NA	9	NA	NA	9	910.808	0.358722	0	NA	NA	9	NA	NA	9	3.05605	0.0204155	0	NA	NA	9	NA	NA	9	3.8369	0.00298136	0	NA	NA	9	42.6906	0.0432903	0	NA	NA	9	-0.0123719	0.0117619	0	NA	NA	9	0.00590119	0.00686864	0	0.0167306	0.00966673	0	249.746
2010-01-11 23:30:00	NA	NA	9	NA	NA	9	910.397	0.333385	0	NA	NA	9	NA	NA	9	3.04741	0.0180294	0	NA	NA	9	NA	NA	9	3.8365	0.0032937	0	NA	NA	9	42.6972	0.0378389	0	NA	NA	9	0.0174251	0.0102918	0	NA	NA	9	-0.00890001	0.0101109	0	0.0225593	0.00905567	0	113.118
2010-01-12 00:30:00	NA	NA	9	NA	NA	9	910.326	0.315843	0	NA	NA	9	NA	NA	9	3.04054	0.0107751	0	NA	NA	9	NA	NA	9	3.83608	0.00283724	0	NA	NA	9	42.7011	0.036414	0	NA	NA	9	-0.00373406	0.0098977	0	NA	NA	9	-0.0408991	0.01206	0	0.0420774	0.0126307	0	181.765
2010-01-12 01:30:00	NA	NA	9	NA	NA	9	910.338	0.298971	0	NA	NA	9	NA	NA	9	3.05238	0.0164163	0	NA	NA	9	NA	NA	9	3.83653	0.00301429	0	NA	NA	9	42.691	0.041399	0	NA	NA	9	-0.00181974	0.0173624	0	NA	NA	9	-0.0247081	0.00877723	0	0.0285017	0.0134104	0	178.645
2010-01-12 02:30:00	NA	NA	9	NA	NA	9	910.97	0.371476	0	NA	NA	9	NA	NA	9	2.94829	0.0337365	0	NA	NA	9	NA	NA	9	3.83084	0.00384707	0	NA	NA	9	42.7569	0.043041	0	NA	NA	9	-0.0697646	0.0298133	0	NA	NA	9	-0.0541182	0.0230414	0	0.0912246	0.0298899	0	230.894
2010-01-12 03:30:00	NA	NA	9	NA	NA	9	911.409	0.358425	0	NA	NA	9	NA	NA	9	2.97114	0.0279	0	NA	NA	9	NA	NA	9	3.83334	0.00373779	0	NA	NA	9	42.7577	0.044248	0	NA	NA	9	-0.0738863	0.0326613	0	NA	NA	9	-0.0575141	0.0193419	0	0.0966495	0.029436	0	229.681
2010-01-12 04:30:00	NA	NA	9	NA	NA	9	911.868	0.31585	0	NA	NA	9	NA	NA	9	3.00599	0.0141744	0	NA	NA	9	NA	NA	9	3.83474	0.00311374	0	NA	NA	9	42.7289	0.0407265	0	NA	NA	9	-0.0371418	0.0228774	0	NA	NA	9	-0.0543118	0.029339	0	0.0681569	0.0326787	0	212.441
2010-01-12 05:30:00	NA	NA	9	NA	NA	9	912.148	0.320222	0	NA	NA	9	NA	NA	9	3.05151	0.0133416	0	NA	NA	9	NA	NA	9	3.8374	0.00290176	0	NA	NA	9	42.702	0.0404944	0	NA	NA	9	-0.00251789	0.0232977	0	NA	NA	9	-0.0139884	0.0280827	0	0.0338103	0.0197427	0	166.857
2010-01-12 06:30:00	NA	NA	9	NA	NA	9	912.441	0.30042	0	NA	NA	9	NA	NA	9	2.99933	0.0142635	0	NA	NA	9	NA	NA	9	3.83375	0.00289179	0	NA	NA	9	42.725	0.0406376	0	NA	NA	9	0.0196938	0.0159204	0	NA	NA	9	0.0113635	0.015979	0	0.0287545	0.0140985	0	88.7649
2010-01-12 07:30:00	NA	NA	9	NA	NA	9	912.461	0.300739	0	NA	NA	9	NA	NA	9	3.01464	0.0150148	0	NA	NA	9	NA	NA	9	3.83472	0.00307016	0	NA	NA	9	42.7169	0.0422361	0	NA	NA	9	-0.00713491	0.00453728	0	NA	NA	9	-0.0252132	0.00656263	0	0.0265088	0.00689494	0	195.17
2010-01-12 08:30:00	NA	NA	9	NA	NA	9	912.322	0.320125	0	NA	NA	9	NA	NA	9	3.03784	0.0136631	0	NA	NA	9	NA	NA	9	3.83617	0.00292639	0	NA	NA	9	42.7045	0.0396124	0	NA	NA	9	0.00305257	0.0058015	0	NA	NA	9	-0.0242207	0.00992793	0	0.0249754	0.0102175	0	174.583
2010-01-12 09:30:00	NA	NA	9	NA	NA	9	912.013	0.332331	0	NA	NA	9	NA	NA	9	3.07627	0.0195856	0	NA	NA	9	NA	NA	9	3.83933	0.00323793	0	NA	NA	9	42.6936	0.0409591	0	NA	NA	9	-0.00530441	0.00584862	0	NA	NA	9	-0.0244841	0.0144447	0	0.0265453	0.012875	0	197.662
2010-01-12 10:30:00	NA	NA	9	NA	NA	9	911.7	0.324427	0	NA	NA	9	NA	NA	9	3.12171	0.0146201	0	NA	NA	9	NA	NA	9	3.84203	0.0033534	0	NA	NA	9	42.6677	0.0450771	0	NA	NA	9	-0.0178548	0.00609342	0	NA	NA	9	-0.0378136	0.0150765	0	0.042805	0.0134454	0	207.892
2010-01-12 11:30:00	NA	NA	9	NA	NA	9	911.541	0.283007	0	NA	NA	9	NA	NA	9	3.14332	0.0140738	0	NA	NA	9	NA	NA	9	3.84385	0.00298694	0	NA	NA	9	42.662	0.0402743	0	NA	NA	9	-0.0108987	0.00949782	0	NA	NA	9	-0.0376519	0.0125549	0	0.0400039	0.0135624	0	193.881
2010-01-12 12:30:00	NA	NA	9	NA	NA	9	911.479	0.303959	0	NA	NA	9	NA	NA	9	3.15284	0.0128961	0	NA	NA	9	NA	NA	9	3.84406	0.00314894	0	NA	NA	9	42.6522	0.0407833	0	NA	NA	9	-0.01149	0.0150147	0	NA	NA	9	-0.0316862	0.0138126	0	0.0358709	0.0162929	0	195.449
2010-01-12 13:30:00	NA	NA	9	NA	NA	9	911.673	0.354115	0	NA	NA	9	NA	NA	9	3.11226	0.0195594	0	NA	NA	9	NA	NA	9	3.83997	0.00386458	0	NA	NA	9	42.6545	0.0423986	0	NA	NA	9	-0.0671202	0.0260266	0	NA	NA	9	0.0151261	0.0105358	0	0.0697446	0.0256499	0	283.814
2010-01-12 14:30:00	NA	NA	9	NA	NA	9	912.087	0.301523	0	NA	NA	9	NA	NA	9	3.09677	0.0122496	0	NA	NA	9	NA	NA	9	3.83948	0.00285909	0	NA	NA	9	42.6684	0.0391838	0	NA	NA	9	-0.0563019	0.0260472	0	NA	NA	9	0.0328745	0.017664	0	0.0668596	0.0277629	0	298.948
2010-01-12 15:30:00	NA	NA	9	NA	NA	9	912.418	0.301978	0	NA	NA	9	NA	NA	9	3.10644	0.0108139	0	NA	NA	9	NA	NA	9	3.8401	0.00279449	0	NA	NA	9	42.6632	0.037584	0	NA	NA	9	-0.0498462	0.0228654	0	NA	NA	9	0.0152589	0.011543	0	0.0534444	0.0227412	0	287.663
2010-01-12 16:30:00	NA	NA	9	NA	NA	9	912.758	0.342275	0	NA	NA	9	NA	NA	9	3.11247	0.0114983	0	NA	NA	9	NA	NA	9	3.8406	0.00323237	0	NA	NA	9	42.6613	0.0437949	0	NA	NA	9	-0.0494735	0.0240409	0	NA	NA	9	0.0096463	0.00996803	0	0.0512014	0.0244209	0	279.657
2010-01-12 17:30:00	NA	NA	9	NA	NA	9	912.999	0.295509	0	NA	NA	9	NA	NA	9	3.11074	0.0129976	0	NA	NA	9	NA	NA	9	3.84175	0.00315794	0	NA	NA	9	42.6778	0.042208	0	NA	NA	9	-0.0621235	0.0253756	0	NA	NA	9	0.00442107	0.0123773	0	0.0635021	0.0253653	0	273.094
2010-01-12 18:30:00	NA	NA	9	NA	NA	9	912.891	0.338819	0	NA	NA	9	NA	NA	9	3.14628	0.023118	0	NA	NA	9	NA	NA	9	3.84374	0.00333519	0	NA	NA	9	42.656	0.0435894	0	NA	NA	9	-0.074626	0.0202025	0	NA	NA	9	0.0365686	0.0198275	0	0.0853756	0.0204542	0	296.138
2010-01-12 19:30:00	NA	NA	9	NA	NA	9	912.595	0.351701	0	NA	NA	9	NA	NA	9	3.18119	0.0114501	0	NA	NA	9	NA	NA	9	3.8461	0.00291141	0	NA	NA	9	42.6397	0.0387128	0	NA	NA	9	-0.0689702	0.0180136	0	NA	NA	9	0.0161945	0.0128122	0	0.0716043	0.0195078	0	282.109
2010-01-12 20:30:00	NA	NA	9	NA	NA	9	912.046	0.339231	0	NA	NA	9	NA	NA	9	3.19177	0.0128224	0	NA	NA	9	NA	NA	9	3.8457	0.00312757	0	NA	NA	9	42.6211	0.0400649	0	NA	NA	9	-0.0466692	0.0166743	0	NA	NA	9	0.0025814	0.0125216	0	0.0480695	0.0175713	0	270.897
2010-01-12 21:30:00	NA	NA	9	NA	NA	9	911.311	0.367452	0	NA	NA	9	NA	NA	9	3.20477	0.0123751	0	NA	NA	9	NA	NA	9	3.84474	0.00312522	0	NA	NA	9	42.5926	0.0405533	0	NA	NA	9	-0.029412	0.00667149	0	NA	NA	9	-0.000825304	0.00717405	0	0.0301985	0.00705346	0	268.843
2010-01-12 22:30:00	NA	NA	9	NA	NA	9	910.68	0.352295	0	NA	NA	9	NA	NA	9	3.23338	0.0252139	0	NA	NA	9	NA	NA	9	3.84698	0.00348357	0	NA	NA	9	42.5834	0.0421643	0	NA	NA	9	-0.00373845	0.0317288	0	NA	NA	9	0.00634735	0.0104679	0	0.0321422	0.0117004	0	202.987
2010-01-12 23:30:00	NA	NA	9	NA	NA	9	910.309	0.322101	0	NA	NA	9	NA	NA	9	3.18441	0.0120903	0	NA	NA	9	NA	NA	9	3.8453	0.00292813	0	NA	NA	9	42.6269	0.0377814	0	NA	NA	9	0.0328476	0.0212381	0	NA	NA	9	0.0193871	0.00707059	0	0.0395047	0.0198795	0	62.9952
2010-01-13 00:30:00	NA	NA	9	NA	NA	9	910.123	0.301679	0	NA	NA	9	NA	NA	9	3.11906	0.0283148	0	NA	NA	9	NA	NA	9	3.84121	0.00352264	0	NA	NA	9	42.6619	0.0410663	0	NA	NA	9	0.0273369	0.0213976	0	NA	NA	9	0.0234527	0.0125766	0	0.0406515	0.0161436	0	90.6252
2010-01-13 01:30:00	NA	NA	9	NA	NA	9	910.12	0.263509	0	NA	NA	9	NA	NA	9	3.06053	0.0199846	0	NA	NA	9	NA	NA	9	3.83742	0.00333382	0	NA	NA	9	42.6916	0.0394902	0	NA	NA	9	-0.0287129	0.0119212	0	NA	NA	9	0.0262879	0.014836	0	0.0417049	0.0117592	0	307.828
2010-01-13 02:30:00	NA	NA	9	NA	NA	9	910.238	0.318097	0	NA	NA	9	NA	NA	9	3.09473	0.0206546	0	NA	NA	9	NA	NA	9	3.83908	0.00322923	0	NA	NA	9	42.6673	0.0410637	0	NA	NA	9	-0.0259538	0.00650776	0	NA	NA	9	0.00835313	0.0131724	0	0.0303403	0.00621339	0	287.701
2010-01-13 03:30:00	NA	NA	9	NA	NA	9	910.651	0.326433	0	NA	NA	9	NA	NA	9	3.10596	0.0213358	0	NA	NA	9	NA	NA	9	3.84046	0.00315529	0	NA	NA	9	42.6694	0.0380235	0	NA	NA	9	-0.0373669	0.0157481	0	NA	NA	9	0.0148475	0.0156359	0	0.0415712	0.0195188	0	287.884
2010-01-13 04:30:00	NA	NA	9	NA	NA	9	911.24	0.37297	0	NA	NA	9	NA	NA	9	3.08607	0.0335912	0	NA	NA	9	NA	NA	9	3.83948	0.00387065	0	NA	NA	9	42.683	0.0470693	0	NA	NA	9	-0.0142472	0.00986274	0	NA	NA	9	0.0275668	0.0130643	0	0.0337424	0.00960283	0	304.965
2010-01-13 05:30:00	NA	NA	9	NA	NA	9	911.615	0.331707	0	NA	NA	9	NA	NA	9	3.13476	0.0114897	0	NA	NA	9	NA	NA	9	3.84181	0.0029911	0	NA	NA	9	42.6479	0.0397781	0	NA	NA	9	-0.0342971	0.0131181	0	NA	NA	9	0.00360186	0.00840227	0	0.0354076	0.0133498	0	276.528
2010-01-13 06:30:00	NA	NA	9	NA	NA	9	911.99	0.308685	0	NA	NA	9	NA	NA	9	3.16443	0.0171159	0	NA	NA	9	NA	NA	9	3.84462	0.00336384	0	NA	NA	9	42.6436	0.0425903	0	NA	NA	9	-0.0461777	0.0111186	0	NA	NA	9	0.0122852	0.014006	0	0.0495916	0.0119861	0	283.898
2010-01-13 07:30:00	NA	NA	9	NA	NA	9	912.238	0.307357	0	NA	NA	9	NA	NA	9	3.18456	0.0127805	0	NA	NA	9	NA	NA	9	3.84648	0.00312933	0	NA	NA	9	42.6402	0.0394726	0	NA	NA	9	-0.0662827	0.0203534	0	NA	NA	9	0.0235365	0.0124221	0	0.0711894	0.0211646	0	289.487
2010-01-13 08:30:00	NA	NA	9	NA	NA	9	912.167	0.321313	0	NA	NA	9	NA	NA	9	3.19847	0.016276	0	NA	NA	9	NA	NA	9	3.8477	0.00285713	0	NA	NA	9	42.6371	0.0381367	0	NA	NA	9	-0.0774791	0.0202223	0	NA	NA	9	0.0215173	0.0107346	0	0.0811992	0.0199199	0	285.982
2010-01-13 09:30:00	NA	NA	9	NA	NA	9	911.98	0.318322	0	NA	NA	9	NA	NA	9	3.21391	0.0123697	0	NA	NA	9	NA	NA	9	3.84868	0.00297234	0	NA	NA	9	42.6293	0.0398701	0	NA	NA	9	-0.100265	0.0293677	0	NA	NA	9	0.0190071	0.015698	0	0.103182	0.0296075	0	280.505
2010-01-13 10:30:00	NA	NA	9	NA	NA	9	911.766	0.294401	0	NA	NA	9	NA	NA	9	3.17364	0.0156122	0	NA	NA	9	NA	NA	9	3.84749	0.00316842	0	NA	NA	9	42.6674	0.0402974	0	NA	NA	9	-0.144968	0.0269854	0	NA	NA	9	0.0278851	0.017516	0	0.148776	0.0263424	0	281.074
2010-01-13 11:30:00	NA	NA	9	NA	NA	9	911.516	0.34493	0	NA	NA	9	NA	NA	9	3.22322	0.0329677	0	NA	NA	9	NA	NA	9	3.85016	0.00326209	0	NA	NA	9	42.6357	0.0389026	0	NA	NA	9	-0.111583	0.0223436	0	NA	NA	9	0.0332037	0.0178544	0	0.117941	0.0214716	0	286.853
2010-01-13 12:30:00	NA	NA	9	NA	NA	9	911.209	0.254197	0	NA	NA	9	NA	NA	9	3.24945	0.0148619	0	NA	NA	9	NA	NA	9	3.85152	0.00300916	0	NA	NA	9	42.6184	0.0422241	0	NA	NA	9	-0.0926141	0.0256223	0	NA	NA	9	0.0270383	0.0133004	0	0.0975771	0.0249087	0	286.975
2010-01-13 13:30:00	NA	NA	9	NA	NA	9	911.214	0.30037	0	NA	NA	9	NA	NA	9	3.28489	0.0139836	0	NA	NA	9	NA	NA	9	3.85272	0.00293334	0	NA	NA	9	42.5869	0.0393347	0	NA	NA	9	-0.0621479	0.0182894	0	NA	NA	9	0.0230715	0.0152201	0	0.0673846	0.0204949	0	288.813
2010-01-13 14:30:00	NA	NA	9	NA	NA	9	911.605	0.430651	0	NA	NA	9	NA	NA	9	3.18265	0.0720364	0	NA	NA	9	NA	NA	9	3.84585	0.00500603	0	NA	NA	9	42.6354	0.0586416	0	NA	NA	9	0.0436093	0.0308483	0	NA	NA	9	0.0255337	0.0150325	0	0.0555136	0.0254809	0	78.9537
2010-01-13 15:30:00	NA	NA	9	NA	NA	9	912.145	0.335501	0	NA	NA	9	NA	NA	9	3.10308	0.011938	0	NA	NA	9	NA	NA	9	3.84174	0.00312102	0	NA	NA	9	42.6883	0.0437453	0	NA	NA	9	0.00149947	0.0177454	0	NA	NA	9	0.0411729	0.0233695	0	0.0448439	0.0233953	0	208.351
2010-01-13 16:30:00	NA	NA	9	NA	NA	9	912.47	0.329195	0	NA	NA	9	NA	NA	9	3.11211	0.028001	0	NA	NA	9	NA	NA	9	3.84272	0.00384222	0	NA	NA	9	42.6884	0.0421873	0	NA	NA	9	-0.0206473	0.0162472	0	NA	NA	9	-0.00354737	0.0156819	0	0.0271144	0.0146093	0	254.747
2010-01-13 17:30:00	NA	NA	9	NA	NA	9	912.716	0.378836	0	NA	NA	9	NA	NA	9	3.21205	0.0194324	0	NA	NA	9	NA	NA	9	3.85009	0.0034697	0	NA	NA	9	42.6488	0.0435487	0	NA	NA	9	-0.116179	0.0421197	0	NA	NA	9	0.0105095	0.0160302	0	0.117737	0.0421536	0	274.04
2010-01-13 18:30:00	NA	NA	9	NA	NA	9	912.903	0.350354	0	NA	NA	9	NA	NA	9	3.19825	0.0266656	0	NA	NA	9	NA	NA	9	3.84916	0.00338407	0	NA	NA	9	42.6552	0.0385262	0	NA	NA	9	-0.123318	0.0220286	0	NA	NA	9	0.0273824	0.0138211	0	0.127099	0.0218928	0	282.553
2010-01-13 19:30:00	NA	NA	9	NA	NA	9	912.672	0.32496	0	NA	NA	9	NA	NA	9	3.31953	0.0266387	0	NA	NA	9	NA	NA	9	3.85737	0.00353743	0	NA	NA	9	42.5984	0.0437388	0	NA	NA	9	-0.120124	0.030731	0	NA	NA	9	0.0165335	0.0174028	0	0.122577	0.0304177	0	277.465
2010-01-13 20:30:00	NA	NA	9	NA	NA	9	912.245	0.301674	0	NA	NA	9	NA	NA	9	3.34068	0.0122522	0	NA	NA	9	NA	NA	9	3.85731	0.00304623	0	NA	NA	9	42.5703	0.0423113	0	NA	NA	9	-0.0887664	0.0192202	0	NA	NA	9	0.0266738	0.0171697	0	0.0943001	0.0190396	0	287.002
2010-01-13 21:30:00	NA	NA	9	NA	NA	9	911.652	0.343051	0	NA	NA	9	NA	NA	9	3.35191	0.0126048	0	NA	NA	9	NA	NA	9	3.85701	0.0028818	0	NA	NA	9	42.5523	0.038168	0	NA	NA	9	-0.0550471	0.0215109	0	NA	NA	9	0.00686269	0.0118747	0	0.0565345	0.0220181	0	275.357
2010-01-13 22:30:00	NA	NA	9	NA	NA	9	910.838	0.370246	0	NA	NA	9	NA	NA	9	3.37708	0.0126567	0	NA	NA	9	NA	NA	9	3.85813	0.00313119	0	NA	NA	9	42.5337	0.0404539	0	NA	NA	9	-0.048211	0.0155469	0	NA	NA	9	0.00721823	0.00760398	0	0.0492283	0.0158898	0	277.664
2010-01-13 23:30:00	NA	NA	9	NA	NA	9	910.416	0.360057	0	NA	NA	9	NA	NA	9	3.27302	0.175318	0	NA	NA	9	NA	NA	9	3.84981	0.0117255	0	NA	NA	9	42.5671	0.0958658	0	NA	NA	9	0.00760298	0.0500786	0	NA	NA	9	0.0447976	0.0231649	0	0.0647031	0.0303552	0	188.505
2010-01-14 00:30:00	NA	NA	9	NA	NA	9	910.35	0.40379	0	NA	NA	9	NA	NA	9	3.03534	0.0944184	0	NA	NA	9	NA	NA	9	3.83665	0.00785947	0	NA	NA	9	42.715	0.0578489	0	NA	NA	9	-0.0178811	0.0430382	0	NA	NA	9	0.0479583	0.0313434	0	0.0699289	0.0237301	0	216.607
2010-01-14 01:30:00	NA	NA	9	NA	NA	9	909.78	0.338868	0	NA	NA	9	NA	NA	9	3.17338	0.0410714	0	NA	NA	9	NA	NA	9	3.84591	0.00469866	0	NA	NA	9	42.6493	0.0455506	0	NA	NA	9	-0.029951	0.016197	0	NA	NA	9	0.0122333	0.0156515	0	0.037547	0.0120023	0	272.766
2010-01-14 02:30:00	NA	NA	9	NA	NA	9	909.737	0.300641	0	NA	NA	9	NA	NA	9	3.21587	0.0306501	0	NA	NA	9	NA	NA	9	3.84854	0.00299098	0	NA	NA	9	42.6263	0.038046	0	NA	NA	9	-0.0157104	0.0196598	0	NA	NA	9	-0.00123216	0.0192795	0	0.0295611	0.0115036	0	194.725
2010-01-14 03:30:00	NA	NA	9	NA	NA	9	910.284	0.436711	0	NA	NA	9	NA	NA	9	3.10323	0.104617	0	NA	NA	9	NA	NA	9	3.83983	0.00771224	0	NA	NA	9	42.6655	0.0671984	0	NA	NA	9	-0.0165489	0.0159522	0	NA	NA	9	0.0542021	0.0396183	0	0.0612406	0.0358483	0	266.491
2010-01-14 04:30:00	NA	NA	9	NA	NA	9	910.723	0.372747	0	NA	NA	9	NA	NA	9	3.11849	0.035161	0	NA	NA	9	NA	NA	9	3.8419	0.00412921	0	NA	NA	9	42.6709	0.0422474	0	NA	NA	9	-0.0271179	0.0111079	0	NA	NA	9	0.00160494	0.0127649	0	0.029601	0.012165	0	273.986
2010-01-14 05:30:00	NA	NA	9	NA	NA	9	911.299	0.370417	0	NA	NA	9	NA	NA	9	3.13404	0.0228212	0	NA	NA	9	NA	NA	9	3.84505	0.00348593	0	NA	NA	9	42.6894	0.0422407	0	NA	NA	9	-0.139716	0.066601	0	NA	NA	9	0.0160575	0.019925	0	0.142089	0.0664947	0	275.411
2010-01-14 06:30:00	NA	NA	9	NA	NA	9	911.93	0.318134	0	NA	NA	9	NA	NA	9	3.14042	0.0207688	0	NA	NA	9	NA	NA	9	3.84686	0.00363658	0	NA	NA	9	42.7031	0.0410725	0	NA	NA	9	-0.187909	0.0392363	0	NA	NA	9	0.0583042	0.0296785	0	0.198918	0.0395046	0	287.304
2010-01-14 07:30:00	NA	NA	9	NA	NA	9	912.21	0.31057	0	NA	NA	9	NA	NA	9	3.20101	0.0346904	0	NA	NA	9	NA	NA	9	3.85139	0.00399953	0	NA	NA	9	42.6797	0.0471278	0	NA	NA	9	-0.173145	0.0376948	0	NA	NA	9	0.0548829	0.0358101	0	0.185771	0.0343939	0	288.083
2010-01-14 08:30:00	NA	NA	9	NA	NA	9	912.149	0.314763	0	NA	NA	9	NA	NA	9	3.27614	0.0222178	0	NA	NA	9	NA	NA	9	3.85571	0.00315793	0	NA	NA	9	42.6349	0.0441218	0	NA	NA	9	-0.161266	0.0435889	0	NA	NA	9	0.0354856	0.0263787	0	0.167795	0.0413049	0	283.374
2010-01-14 09:30:00	NA	NA	9	NA	NA	9	912.05	0.312478	0	NA	NA	9	NA	NA	9	3.25833	0.0445536	0	NA	NA	9	NA	NA	9	3.85438	0.00408917	0	NA	NA	9	42.6418	0.0434396	0	NA	NA	9	-0.110886	0.0406337	0	NA	NA	9	0.0129258	0.023398	0	0.114203	0.0402334	0	274.774
2010-01-14 10:30:00	NA	NA	9	NA	NA	9	911.766	0.325669	0	NA	NA	9	NA	NA	9	3.2894	0.0216849	0	NA	NA	9	NA	NA	9	3.85584	0.00322371	0	NA	NA	9	42.6194	0.0361535	0	NA	NA	9	-0.0706431	0.03421	0	NA	NA	9	0.00873885	0.0157996	0	0.0729096	0.0342171	0	276.979
2010-01-14 11:30:00	NA	NA	9	NA	NA	9	911.442	0.31529	0	NA	NA	9	NA	NA	9	3.24732	0.063868	0	NA	NA	9	NA	NA	9	3.8517	0.00567246	0	NA	NA	9	42.6234	0.0510851	0	NA	NA	9	-0.0128787	0.0320258	0	NA	NA	9	0.00686738	0.0279943	0	0.0411365	0.0181471	0	186.333
2010-01-14 12:30:00	NA	NA	9	NA	NA	9	911.291	0.386138	0	NA	NA	9	NA	NA	9	3.22703	0.0536143	0	NA	NA	9	NA	NA	9	3.85195	0.00454205	0	NA	NA	9	42.6531	0.0473779	0	NA	NA	9	-0.0514258	0.0266898	0	NA	NA	9	0.0277993	0.0278338	0	0.0671803	0.0197654	0	286.072
2010-01-14 13:30:00	NA	NA	9	NA	NA	9	910.987	0.353136	0	NA	NA	9	NA	NA	9	3.31614	0.0348701	0	NA	NA	9	NA	NA	9	3.8559	0.00360529	0	NA	NA	9	42.5856	0.0481758	0	NA	NA	9	-0.0303173	0.0174018	0	NA	NA	9	0.0244008	0.0183574	0	0.0412863	0.0212059	0	305.885
2010-01-14 14:30:00	NA	NA	9	NA	NA	9	911.336	0.341066	0	NA	NA	9	NA	NA	9	3.12208	0.0804168	0	NA	NA	9	NA	NA	9	3.84313	0.00627718	0	NA	NA	9	42.6811	0.0577355	0	NA	NA	9	-0.000188738	0.0206937	0	NA	NA	9	0.0425015	0.0286134	0	0.0487266	0.0260532	0	208.242
2010-01-14 15:30:00	NA	NA	9	NA	NA	9	911.76	0.341429	0	NA	NA	9	NA	NA	9	3.072	0.0344318	0	NA	NA	9	NA	NA	9	3.83973	0.00377496	0	NA	NA	9	42.7043	0.0439428	0	NA	NA	9	0.00364752	0.0111916	0	NA	NA	9	0.0268256	0.0128418	0	0.0298521	0.0114824	0	134.712
2010-01-14 16:30:00	NA	NA	9	NA	NA	9	912.159	0.330193	0	NA	NA	9	NA	NA	9	3.06413	0.0574424	0	NA	NA	9	NA	NA	9	3.8388	0.00565746	0	NA	NA	9	42.7028	0.0452213	0	NA	NA	9	0.00391787	0.0332749	0	NA	NA	9	0.0117749	0.0146038	0	0.0285876	0.0256294	0	261.104
2010-01-14 17:30:00	NA	NA	9	NA	NA	9	912.882	0.344148	0	NA	NA	9	NA	NA	9	2.92203	0.0145061	0	NA	NA	9	NA	NA	9	3.82935	0.00296985	0	NA	NA	9	42.7717	0.0387312	0	NA	NA	9	0.0101079	0.0499406	0	NA	NA	9	0.00495223	0.01152	0	0.0389987	0.0350969	0	220.962
2010-01-14 18:30:00	NA	NA	9	NA	NA	9	913.1	0.315101	0	NA	NA	9	NA	NA	9	2.98454	0.012525	0	NA	NA	9	NA	NA	9	3.8343	0.00301083	0	NA	NA	9	42.7509	0.0372563	0	NA	NA	9	-0.0181253	0.0101024	0	NA	NA	9	0.0221275	0.0109356	0	0.0313022	0.00773831	0	318.73
2010-01-14 19:30:00	NA	NA	9	NA	NA	9	913.069	0.340165	0	NA	NA	9	NA	NA	9	3.00698	0.0109005	0	NA	NA	9	NA	NA	9	3.83526	0.00310468	0	NA	NA	9	42.7333	0.0413017	0	NA	NA	9	-0.0296394	0.00618973	0	NA	NA	9	0.0223427	0.00794055	0	0.0374031	0.00894713	0	306.287
2010-01-14 20:30:00	NA	NA	9	NA	NA	9	912.93	0.334953	0	NA	NA	9	NA	NA	9	3.05711	0.0227344	0	NA	NA	9	NA	NA	9	3.84007	0.00360515	0	NA	NA	9	42.7275	0.0404104	0	NA	NA	9	-0.0451586	0.0207325	0	NA	NA	9	0.0369758	0.0232207	0	0.0605013	0.0267394	0	307.054
2010-01-14 21:30:00	NA	NA	9	NA	NA	9	912.437	0.358129	0	NA	NA	9	NA	NA	9	3.07851	0.0238022	0	NA	NA	9	NA	NA	9	3.84084	0.00353722	0	NA	NA	9	42.7092	0.0388238	0	NA	NA	9	-0.0223293	0.0261232	0	NA	NA	9	0.0397475	0.0214893	0	0.0507565	0.02542	0	260.664
2010-01-14 22:30:00	NA	NA	9	NA	NA	9	NA	NA	3	NA	NA	9	NA	NA	9	NA	NA	3	NA	NA	3	NA	NA	9	NA	NA	3	NA	NA	9	NA	NA	3	NA	NA	9	NA	NA	3	NA	NA	9	NA	NA	3	NA	NA	3	NA
2010-01-14 23:30:00	NA	NA	9	NA	NA	9	NA	NA	9	NA	NA	9	NA	NA	9	NA	NA	9	NA	NA	9	NA	NA	9	NA	NA	9	NA	NA	9	NA	NA	9	NA	NA	9	NA	NA	9	NA	NA	9	NA	NA	9	NA	NA	9	NA
2010-01-15 00:30:00	NA	NA	9	NA	NA	9	NA	NA	3	NA	NA	9	NA	NA	9	NA	NA	3	NA	NA	9	NA	NA	9	NA	NA	3	NA	NA	9	NA	NA	3	NA	NA	9	NA	NA	3	NA	NA	9	NA	NA	3	NA	NA	3	NA
2010-01-15 01:30:00	NA	NA	9	NA	NA	9	910.801	0.407578	0	NA	NA	9	NA	NA	9	2.83882	0.0398662	0	NA	NA	9	NA	NA	9	3.80014	0.00906919	0	NA	NA	9	42.5165	0.160188	0	NA	NA	9	0.0179982	0.0185346	0	NA	NA	9	0.00165666	0.0132133	0	0.0241036	0.0162381	0	126.222
2010-01-15 02:30:00	NA	NA	9	NA	NA	9	910.435	0.307955	0	NA	NA	9	NA	NA	9	2.79487	0.0124348	0	NA	NA	9	NA	NA	9	3.81178	0.00348546	0	NA	NA	9	42.7208	0.0455825	0	NA	NA	9	0.0194419	0.0127479	0	NA	NA	9	-0.000913471	0.014127	0	0.0256164	0.00919495	0	105.652
2010-01-15 03:30:00	NA	NA	9	NA	NA	9	910.626	0.327431	0	NA	NA	9	NA	NA	9	2.79522	0.0105574	0	NA	NA	9	NA	NA	9	3.81454	0.00307581	0	NA	NA	9	42.7549	0.0397154	0	NA	NA	9	-0.0106833	0.0298004	0	NA	NA	9	-0.00715003	0.0152059	0	0.0335965	0.0124609	0	214.678
2010-01-15 04:30:00	NA	NA	9	NA	NA	9	911.078	0.347028	0	NA	NA	9	NA	NA	9	2.79611	0.0143992	0	NA	NA	9	NA	NA	9	3.81628	0.00306236	0	NA	NA	9	42.7753	0.0402297	0	NA	NA	9	-0.0655886	0.0230655	0	NA	NA	9	0.0476449	0.0237365	0	0.0826688	0.0288629	0	304.537
2010-01-15 05:30:00	NA	NA	9	NA	NA	9	911.655	0.367465	0	NA	NA	9	NA	NA	9	2.78555	0.0143112	0	NA	NA	9	NA	NA	9	3.81646	0.00341583	0	NA	NA	9	42.7912	0.0434803	0	NA	NA	9	-0.0656173	0.0224015	0	NA	NA	9	0.0872415	0.0283285	0	0.111638	0.0275247	0	321.336
2010-01-15 06:30:00	NA	NA	9	NA	NA	9	912.197	0.294789	0	NA	NA	9	NA	NA	9	2.84078	0.0214789	0	NA	NA	9	NA	NA	9	3.82136	0.00396954	0	NA	NA	9	42.7793	0.0435761	0	NA	NA	9	-0.0847474	0.0351917	0	NA	NA	9	0.0939256	0.032192	0	0.131	0.0334248	0	316.452
2010-01-15 07:30:00	NA	NA	9	NA	NA	9	NA	NA	9	NA	NA	9	NA	NA	9	NA	NA	9	NA	NA	9	NA	NA	9	NA	NA	9	NA	NA	9	NA	NA	9	NA	NA	9	NA	NA	9	NA	NA	9	NA	NA	9	NA	NA	9	NA
2010-01-15 08:30:00	NA	NA	9	NA	NA	9	NA	NA	9	NA	NA	9	NA	NA	9	NA	NA	9	NA	NA	9	NA	NA	9	NA	NA	9	NA	NA	9	NA	NA	9	NA	NA	9	NA	NA	9	NA	NA	9	NA	NA	9	NA	NA	9	NA
2010-01-15 09:30:00	NA	NA	9	NA	NA	9	NA	NA	9	NA	NA	9	NA	NA	9	NA	NA	9	NA	NA	9	NA	NA	9	NA	NA	9	NA	NA	9	NA	NA	9	NA	NA	9	NA	NA	9	NA	NA	9	NA	NA	9	NA	NA	9	NA
2010-01-15 10:30:00	NA	NA	9	NA	NA	9	NA	NA	9	NA	NA	9	NA	NA	9	NA	NA	9	NA	NA	9	NA	NA	9	NA	NA	9	NA	NA	9	NA	NA	9	NA	NA	9	NA	NA	9	NA	NA	9	NA	NA	9	NA	NA	9	NA
2010-01-15 11:30:00	NA	NA	9	NA	NA	9	NA	NA	9	NA	NA	9	NA	NA	9	NA	NA	9	NA	NA	9	NA	NA	9	NA	NA	9	NA	NA	9	NA	NA	9	NA	NA	9	NA	NA	9	NA	NA	9	NA	NA	9	NA	NA	9	NA
2010-01-15 12:30:00	NA	NA	9	NA	NA	9	NA	NA	9	NA	NA	9	NA	NA	9	NA	NA	9	NA	NA	9	NA	NA	9	NA	NA	9	NA	NA	9	NA	NA	9	NA	NA	9	NA	NA	9	NA	NA	9	NA	NA	9	NA	NA	9	NA
2010-01-15 13:30:00	NA	NA	9	NA	NA	9	NA	NA	9	NA	NA	9	NA	NA	9	NA	NA	9	NA	NA	9	NA	NA	9	NA	NA	9	NA	NA	9	NA	NA	9	NA	NA	9	NA	NA	9	NA	NA	9	NA	NA	9	NA	NA	9	NA
2010-01-15 14:30:00	NA	NA	9	NA	NA	9	NA	NA	9	NA	NA	9	NA	NA	9	NA	NA	9	NA	NA	9	NA	NA	9	NA	NA	9	NA	NA	9	NA	NA	9	NA	NA	9	NA	NA	9	NA	NA	9	NA	NA	9	NA	NA	9	NA
2010-01-15 15:30:00	NA	NA	9	NA	NA	9	NA	NA	9	NA	NA	9	NA	NA	9	NA	NA	9	NA	NA	9	NA	NA	9	NA	NA	9	NA	NA	9	NA	NA	9	NA	NA	9	NA	NA	9	NA	NA	9	NA	NA	9	NA	NA	9	NA
2010-01-15 16:30:00	NA	NA	9	NA	NA	9	NA	NA	9	NA	NA	9	NA	NA	9	NA	NA	9	NA	NA	9	NA	NA	9	NA	NA	9	NA	NA	9	NA	NA	9	NA	NA	9	NA	NA	9	NA	NA	9	NA	NA	9	NA	NA	9	NA
2010-01-15 17:30:00	NA	NA	9	NA	NA	9	NA	NA	9	NA	NA	9	NA	NA	9	NA	NA	9	NA	NA	9	NA	NA	9	NA	NA	9	NA	NA	9	NA	NA	9	NA	NA	9	NA	NA	9	NA	NA	9	NA	NA	9	NA	NA	9	NA
2010-01-15 18:30:00	NA	NA	9	NA	NA	9	NA	NA	9	NA	NA	9	NA	NA	9	NA	NA	9	NA	NA	9	NA	NA	9	NA	NA	9	NA	NA	9	NA	NA	9	NA	NA	9	NA	NA	9	NA	NA	9	NA	NA	9	NA	NA	9	NA
2010-01-15 19:30:00	NA	NA	9	NA	NA	9	NA	NA	3	NA	NA	9	NA	NA	9	NA	NA	3	NA	NA	9	NA	NA	9	NA	NA	3	NA	NA	9	NA	NA	3	NA	NA	9	NA	NA	3	NA	NA	9	NA	NA	3	NA	NA	3	NA
2010-01-15 20:30:00	NA	NA	9	NA	NA	9	913.356	0.445269	0	NA	NA	9	NA	NA	9	3.07428	0.0149422	0	NA	NA	9	NA	NA	9	3.81238	0.0079595	0	NA	NA	9	42.3592	0.106711	0	NA	NA	9	-0.00502926	0.00710778	0	NA	NA	9	0.0206965	0.00299939	0	0.0223989	0.00337932	0	261.916
2010-01-15 21:30:00	NA	NA	9	NA	NA	9	912.694	0.323444	0	NA	NA	9	NA	NA	9	3.07418	0.0105227	0	NA	NA	9	NA	NA	9	3.82527	0.0059552	0	NA	NA	9	42.5204	0.0756407	0	NA	NA	9	-0.00706154	0.0195078	0	NA	NA	9	0.0212701	0.00572642	0	0.0290647	0.00840733	0	187.339
2010-01-15 22:30:00	NA	NA	9	NA	NA	9	912.145	0.357607	0	NA	NA	9	NA	NA	9	3.07867	0.0170297	0	NA	NA	9	NA	NA	9	3.83162	0.00415385	0	NA	NA	9	42.5941	0.0565313	0	NA	NA	9	-0.00170047	0.0121673	0	NA	NA	9	0.00430995	0.0074575	0	0.0140874	0.00515488	0	202.316
2010-01-15 23:30:00	NA	NA	9	NA	NA	9	911.366	0.405347	0	NA	NA	9	NA	NA	9	3.07007	0.0091765	0	NA	NA	9	NA	NA	9	3.83072	0.00427777	0	NA	NA	9	42.5946	0.0538662	0	NA	NA	9	-0.0139906	0.00445082	0	NA	NA	9	0.0147305	0.00359562	0	0.0209188	0.00280241	0	316.605
2010-01-16 00:30:00	NA	NA	9	NA	NA	9	910.878	0.343043	0	NA	NA	9	NA	NA	9	3.02768	0.0218291	0	NA	NA	9	NA	NA	9	3.82937	0.00451661	0	NA	NA	9	42.6338	0.0477131	0	NA	NA	9	0.0366469	0.0206775	0	NA	NA	9	0.00640965	0.02467	0	0.0448023	0.020314	0	86.5705
2010-01-16 01:30:00	NA	NA	9	NA	NA	9	910.378	0.299883	0	NA	NA	9	NA	NA	9	3.01314	0.0151919	0	NA	NA	9	NA	NA	9	3.83005	0.00379215	0	NA	NA	9	42.6618	0.0483157	0	NA	NA	9	0.0165832	0.0215161	0	NA	NA	9	0.0381177	0.0210693	0	0.0469064	0.0208409	0	103.063
2010-01-16 02:30:00	NA	NA	9	NA	NA	9	910.124	0.297826	0	NA	NA	9	NA	NA	9	2.95558	0.0248128	0	NA	NA	9	NA	NA	9	3.82633	0.00368112	0	NA	NA	9	42.6912	0.0511253	0	NA	NA	9	0.022304	0.0341939	0	NA	NA	9	0.0338201	0.0292374	0	0.0555442	0.0240699	0	130.617
2010-01-16 03:30:00	NA	NA	9	NA	NA	9	910.323	0.317946	0	NA	NA	9	NA	NA	9	2.87916	0.0257572	0	NA	NA	9	NA	NA	9	3.82129	0.00422057	0	NA	NA	9	42.7288	0.0485215	0	NA	NA	9	0.0473694	0.0188418	0	NA	NA	9	-0.0128369	0.0157884	0	0.0513738	0.019327	0	104.802
2010-01-16 04:30:00	NA	NA	9	NA	NA	9	910.62	0.350494	0	NA	NA	9	NA	NA	9	2.8697	0.0188118	0	NA	NA	9	NA	NA	9	3.82431	0.00418088	0	NA	NA	9	42.7791	0.0533739	0	NA	NA	9	0.0130638	0.0198029	0	NA	NA	9	0.00928163	0.0071001	0	0.0231205	0.0128322	0	117.127
2010-01-16 05:30:00	NA	NA	9	NA	NA	9	911.09	0.370718	0	NA	NA	9	NA	NA	9	2.85914	0.0153267	0	NA	NA	9	NA	NA	9	3.82335	0.00430171	0	NA	NA	9	42.7807	0.0576269	0	NA	NA	9	-0.00990067	0.00600427	0	NA	NA	9	0.0147662	0.00737213	0	0.0194477	0.00531186	0	305.956
2010-01-16 06:30:00	NA	NA	9	NA	NA	9	911.723	0.358428	0	NA	NA	9	NA	NA	9	2.86061	0.0105367	0	NA	NA	9	NA	NA	9	3.8216	0.00341374	0	NA	NA	9	42.7563	0.0442579	0	NA	NA	9	-0.0202793	0.00488812	0	NA	NA	9	0.017198	0.00800105	0	0.0271179	0.00771601	0	308.324
2010-01-16 07:30:00	NA	NA	9	NA	NA	9	912.433	0.410417	0	NA	NA	9	NA	NA	9	2.80791	0.0592692	0	NA	NA	9	NA	NA	9	3.81685	0.00561233	0	NA	NA	9	42.766	0.045242	0	NA	NA	9	-0.0553685	0.0340195	0	NA	NA	9	0.0504556	0.0326333	0	0.0762181	0.0449932	0	312.244
2010-01-16 08:30:00	NA	NA	9	NA	NA	9	913.035	0.338654	0	NA	NA	9	NA	NA	9	2.74244	0.0121973	0	NA	NA	9	NA	NA	9	3.81187	0.00280359	0	NA	NA	9	42.7897	0.0377627	0	NA	NA	9	-0.0870752	0.0258357	0	NA	NA	9	0.0675983	0.0253857	0	0.112416	0.0287387	0	307.534
2010-01-16 09:30:00	NA	NA	9	NA	NA	9	913.155	0.338894	0	NA	NA	9	NA	NA	9	2.77907	0.032915	0	NA	NA	9	NA	NA	9	3.81559	0.00405387	0	NA	NA	9	42.7879	0.0386079	0	NA	NA	9	-0.0798933	0.0233386	0	NA	NA	9	0.0630949	0.0201844	0	0.103386	0.0250441	0	308.497
2010-01-16 10:30:00	NA	NA	9	NA	NA	9	912.958	0.305461	0	NA	NA	9	NA	NA	9	2.81883	0.0132859	0	NA	NA	9	NA	NA	9	3.81921	0.00312199	0	NA	NA	9	42.7809	0.0406955	0	NA	NA	9	-0.0991733	0.0279149	0	NA	NA	9	0.0681847	0.0264248	0	0.122379	0.0313869	0	303.44
2010-01-16 11:30:00	NA	NA	9	NA	NA	9	912.683	0.343741	0	NA	NA	9	NA	NA	9	2.79411	0.0127437	0	NA	NA	9	NA	NA	9	3.8175	0.00306885	0	NA	NA	9	42.7922	0.0412258	0	NA	NA	9	-0.112898	0.0281795	0	NA	NA	9	0.0910657	0.0304793	0	0.146887	0.034434	0	307.81
2010-01-16 12:30:00	NA	NA	9	NA	NA	9	912.325	0.342274	0	NA	NA	9	NA	NA	9	2.77689	0.0132605	0	NA	NA	9	NA	NA	9	3.81677	0.00295343	0	NA	NA	9	42.8062	0.0418671	0	NA	NA	9	-0.151919	0.0352525	0	NA	NA	9	0.103444	0.0260394	0	0.185397	0.0364484	0	304.512
2010-01-16 13:30:00	NA	NA	9	NA	NA	9	911.978	0.300284	0	NA	NA	9	NA	NA	9	2.78821	0.0106967	0	NA	NA	9	NA	NA	9	3.8177	0.00321395	0	NA	NA	9	42.8031	0.039894	0	NA	NA	9	-0.175191	0.0346712	0	NA	NA	9	0.102414	0.0315191	0	0.204549	0.0391838	0	299.948
2010-01-16 14:30:00	NA	NA	9	NA	NA	9	911.682	0.307685	0	NA	NA	9	NA	NA	9	2.82259	0.0236402	0	NA	NA	9	NA	NA	9	3.82072	0.00298776	0	NA	NA	9	42.7957	0.0396565	0	NA	NA	9	-0.110506	0.0325037	0	NA	NA	9	0.0948656	0.0317201	0	0.147827	0.0376902	0	310.377
2010-01-16 15:30:00	NA	NA	9	NA	NA	9	911.666	0.300274	0	NA	NA	9	NA	NA	9	2.87538	0.0228238	0	NA	NA	9	NA	NA	9	3.82496	0.00303902	0	NA	NA	9	42.779	0.0359032	0	NA	NA	9	-0.100711	0.0321865	0	NA	NA	9	0.079242	0.0241855	0	0.130537	0.0316657	0	308.805
2010-01-16 16:30:00	NA	NA	9	NA	NA	9	911.886	0.310884	0	NA	NA	9	NA	NA	9	2.90739	0.0121295	0	NA	NA	9	NA	NA	9	3.82766	0.0031041	0	NA	NA	9	42.7704	0.0404353	0	NA	NA	9	-0.0642635	0.0177926	0	NA	NA	9	0.0625253	0.0336957	0	0.0918749	0.0324033	0	311.49
2010-01-16 17:30:00	NA	NA	9	NA	NA	9	912.274	0.315274	0	NA	NA	9	NA	NA	9	2.93383	0.0225812	0	NA	NA	9	NA	NA	9	3.82979	0.00380529	0	NA	NA	9	42.762	0.0480376	0	NA	NA	9	-0.0420916	0.0179524	0	NA	NA	9	0.0299928	0.0175485	0	0.053528	0.0208845	0	300.479
2010-01-16 18:30:00	NA	NA	9	NA	NA	9	912.577	0.358673	0	NA	NA	9	NA	NA	9	2.98172	0.0169162	0	NA	NA	9	NA	NA	9	3.83306	0.00329985	0	NA	NA	9	42.7395	0.0434163	0	NA	NA	9	-0.0647617	0.0274008	0	NA	NA	9	-0.0196829	0.0257617	0	0.0714333	0.0298822	0	258.82
2010-01-16 19:30:00	NA	NA	9	NA	NA	9	912.876	0.314485	0	NA	NA	9	NA	NA	9	3.02616	0.015067	0	NA	NA	9	NA	NA	9	3.83593	0.00310224	0	NA	NA	9	42.7166	0.0418117	0	NA	NA	9	-0.0673175	0.0316852	0	NA	NA	9	-0.0123134	0.0367541	0	0.0767503	0.0338645	0	267.034
2010-01-16 20:30:00	NA	NA	9	NA	NA	9	913.129	0.311073	0	NA	NA	9	NA	NA	9	3.0079	0.0100212	0	NA	NA	9	NA	NA	9	3.83504	0.00322343	0	NA	NA	9	42.7294	0.0426628	0	NA	NA	9	-0.035965	0.0294044	0	NA	NA	9	0.0184815	0.022856	0	0.0448046	0.0318497	0	286.939
2010-01-16 21:30:00	NA	NA	9	NA	NA	9	912.974	0.301734	0	NA	NA	9	NA	NA	9	3.02764	0.0164712	0	NA	NA	9	NA	NA	9	3.83664	0.00302116	0	NA	NA	9	42.7234	0.0395702	0	NA	NA	9	-0.121554	0.0350248	0	NA	NA	9	0.0754654	0.0316683	0	0.145533	0.0389833	0	300.981
2010-01-16 22:30:00	NA	NA	9	NA	NA	9	912.469	0.351448	0	NA	NA	9	NA	NA	9	3.07409	0.020365	0	NA	NA	9	NA	NA	9	3.83944	0.00343671	0	NA	NA	9	42.6975	0.0392608	0	NA	NA	9	-0.097654	0.0319506	0	NA	NA	9	0.0648852	0.0276276	0	0.11906	0.0368101	0	302.544
2010-01-16 23:30:00	NA	NA	9	NA	NA	9	911.857	0.420332	0	NA	NA	9	NA	NA	9	3.11533	0.0261053	0	NA	NA	9	NA	NA	9	3.84293	0.00399425	0	NA	NA	9	42.6872	0.0474072	0	NA	NA	9	-0.0531146	0.0204668	0	NA	NA	9	0.0481658	0.017588	0	0.0731366	0.0228088	0	312.407
2010-01-17 00:30:00	NA	NA	9	NA	NA	9	911.261	0.346562	0	NA	NA	9	NA	NA	9	3.0231	0.0473764	0	NA	NA	9	NA	NA	9	3.83693	0.0163035	0	NA	NA	9	42.7343	0.203892	0	NA	NA	9	0.01837	0.0196145	0	NA	NA	9	0.0431153	0.0142006	0	0.0497053	0.0176634	0	71.8922
2010-01-17 01:30:00	NA	NA	9	NA	NA	9	910.603	0.367611	0	NA	NA	9	NA	NA	9	3.01161	0.010692	0	NA	NA	9	NA	NA	9	3.84013	0.00445638	0	NA	NA	9	42.7896	0.057337	0	NA	NA	9	9.88475e-05	0.0109143	0	NA	NA	9	0.0166837	0.0115358	0	0.020172	0.0111163	0	192.469
2010-01-17 02:30:00	NA	NA	9	NA	NA	9	910.3	0.292542	0	NA	NA	9	NA	NA	9	2.97641	0.0164674	0	NA	NA	9	NA	NA	9	3.83709	0.00436199	0	NA	NA	9	42.7984	0.0578928	0	NA	NA	9	0.0194187	0.00861914	0	NA	NA	9	0.00862255	0.00694981	0	0.0222661	0.00884417	0	71.6898
2010-01-17 03:30:00	NA	NA	9	NA	NA	9	910.159	0.317754	0	NA	NA	9	NA	NA	9	2.95081	0.0091231	0	NA	NA	9	NA	NA	9	3.83426	0.00395936	0	NA	NA	9	42.7969	0.0518085	0	NA	NA	9	0.000179991	0.0226368	0	NA	NA	9	0.0103192	0.00911774	0	0.0239731	0.0112741	0	205.597
2010-01-17 04:30:00	NA	NA	9	NA	NA	9	910.251	0.353181	0	NA	NA	9	NA	NA	9	2.95355	0.0150264	0	NA	NA	9	NA	NA	9	3.83317	0.0043203	0	NA	NA	9	42.7795	0.0539798	0	NA	NA	9	-0.0226445	0.0153616	0	NA	NA	9	0.019321	0.00906253	0	0.0306825	0.0162091	0	313.5
2010-01-17 05:30:00	NA	NA	9	NA	NA	9	910.848	0.40833	0	NA	NA	9	NA	NA	9	2.90856	0.0164087	0	NA	NA	9	NA	NA	9	3.82923	0.00348569	0	NA	NA	9	42.7892	0.0418832	0	NA	NA	9	-0.0386043	0.0252219	0	NA	NA	9	0.0127377	0.0154112	0	0.0437252	0.024782	0	283.373
2010-01-17 06:30:00	NA	NA	9	NA	NA	9	911.488	0.368336	0	NA	NA	9	NA	NA	9	2.91673	0.0139885	0	NA	NA	9	NA	NA	9	3.82978	0.00318076	0	NA	NA	9	42.7849	0.0421509	0	NA	NA	9	-0.0558082	0.0247774	0	NA	NA	9	0.0302232	0.0200774	0	0.0652163	0.0281375	0	295.875
2010-01-17 07:30:00	NA	NA	9	NA	NA	9	911.906	0.309555	0	NA	NA	9	NA	NA	9	3.00614	0.0431014	0	NA	NA	9	NA	NA	9	3.83664	0.00428042	0	NA	NA	9	42.7525	0.0395425	0	NA	NA	9	-0.0462638	0.0263103	0	NA	NA	9	0.022201	0.0200378	0	0.0536675	0.029097	0	291.472
2010-01-17 08:30:00	NA	NA	9	NA	NA	9	912.371	0.317458	0	NA	NA	9	NA	NA	9	3.04141	0.0142663	0	NA	NA	9	NA	NA	9	3.83884	0.00326255	0	NA	NA	9	42.7331	0.0412237	0	NA	NA	9	-0.0569523	0.0284599	0	NA	NA	9	0.0303402	0.0209239	0	0.0660492	0.0323922	0	295.292
2010-01-17 09:30:00	NA	NA	9	NA	NA	9	912.569	0.316752	0	NA	NA	9	NA	NA	9	3.07016	0.0124277	0	NA	NA	9	NA	NA	9	3.84093	0.00347797	0	NA	NA	9	42.7212	0.0466094	0	NA	NA	9	-0.0752094	0.0331588	0	NA	NA	9	0.0431149	0.0268262	0	0.0885158	0.0387205	0	296.842
2010-01-17 10:30:00	NA	NA	9	NA	NA	9	912.561	0.317929	0	NA	NA	9	NA	NA	9	3.08079	0.0184966	0	NA	NA	9	NA	NA	9	3.84144	0.003282	0	NA	NA	9	42.7136	0.0417514	0	NA	NA	9	-0.0661001	0.03442	0	NA	NA	9	0.0391824	0.0268994	0	0.0789176	0.0398076	0	298.879
2010-01-17 11:30:00	NA	NA	9	NA	NA	9	912.184	0.342743	0	NA	NA	9	NA	NA	9	3.15209	0.0314708	0	NA	NA	9	NA	NA	9	3.84832	0.00431368	0	NA	NA	9	42.7057	0.0463604	0	NA	NA	9	-0.0254944	0.0198474	0	NA	NA	9	0.0377473	0.023687	0	0.0474021	0.0279779	0	316.058
2010-01-17 12:30:00	NA	NA	9	NA	NA	9	911.861	0.329352	0	NA	NA	9	NA	NA	9	3.12891	0.0671021	0	NA	NA	9	NA	NA	9	3.84547	0.00643709	0	NA	NA	9	42.701	0.0619624	0	NA	NA	9	0.0314665	0.0571403	0	NA	NA	9	0.0196309	0.0168522	0	0.058451	0.0388184	0	210.618
2010-01-17 13:30:00	NA	NA	9	NA	NA	9	911.67	0.326597	0	NA	NA	9	NA	NA	9	3.03468	0.0114732	0	NA	NA	9	NA	NA	9	3.84175	0.00405861	0	NA	NA	9	42.7788	0.0523828	0	NA	NA	9	0.0398299	0.0262314	0	NA	NA	9	0.023499	0.0099845	0	0.0496371	0.0215028	0	84.4041
2010-01-17 14:30:00	NA	NA	9	NA	NA	9	911.284	0.308426	0	NA	NA	9	NA	NA	9	3.01531	0.0149601	0	NA	NA	9	NA	NA	9	3.83837	0.00474376	0	NA	NA	9	42.7623	0.0565806	0	NA	NA	9	0.0163528	0.0112812	0	NA	NA	9	0.0111184	0.00693246	0	0.0222815	0.00835662	0	94.4906
2010-01-17 15:30:00	NA	NA	9	NA	NA	9	911.37	0.3209	0	NA	NA	9	NA	NA	9	2.97634	0.031857	0	NA	NA	9	NA	NA	9	3.83349	0.00323073	0	NA	NA	9	42.7527	0.0518869	0	NA	NA	9	0.0535812	0.015245	0	NA	NA	9	0.0225236	0.00770508	0	0.0589102	0.0141272	0	66.0581
2010-01-17 16:30:00	NA	NA	9	NA	NA	9	911.527	0.337879	0	NA	NA	9	NA	NA	9	2.96212	0.0197178	0	NA	NA	9	NA	NA	9	3.83405	0.00375359	0	NA	NA	9	42.7784	0.0488208	0	NA	NA	9	-0.00483066	0.0174527	0	NA	NA	9	0.0365812	0.0119753	0	0.0409739	0.0114233	0	231.138
2010-01-17 17:30:00	NA	NA	9	NA	NA	9	911.663	0.330677	0	NA	NA	9	NA	NA	9	3.00897	0.0143272	0	NA	NA	9	NA	NA	9	3.83757	0.00433597	0	NA	NA	9	42.7604	0.0569719	0	NA	NA	9	-0.020179	0.00730744	0	NA	NA	9	0.026868	0.0144299	0	0.0346337	0.0138264	0	320.522
2010-01-17 18:30:00	NA	NA	9	NA	NA	9	912.174	0.332494	0	NA	NA	9	NA	NA	9	2.99808	0.0195779	0	NA	NA	9	NA	NA	9	3.83635	0.00403168	0	NA	NA	9	42.7593	0.0548022	0	NA	NA	9	-0.0313486	0.00829584	0	NA	NA	9	0.0073386	0.0123079	0	0.0343838	0.00863531	0	284.157
2010-01-17 19:30:00	NA	NA	9	NA	NA	9	912.591	0.336059	0	NA	NA	9	NA	NA	9	3.03812	0.0219772	0	NA	NA	9	NA	NA	9	3.83856	0.00355159	0	NA	NA	9	42.7339	0.0493865	0	NA	NA	9	-0.0544268	0.0279153	0	NA	NA	9	0.0301255	0.0212054	0	0.0638803	0.0319054	0	295.853
2010-01-17 20:30:00	NA	NA	9	NA	NA	9	912.977	0.337892	0	NA	NA	9	NA	NA	9	2.98692	0.0308212	0	NA	NA	9	NA	NA	9	3.83505	0.00370072	0	NA	NA	9	42.7573	0.0438826	0	NA	NA	9	-0.116739	0.0534567	0	NA	NA	9	0.0809708	0.0486622	0	0.145728	0.0645957	0	297.166
2010-01-17 21:30:00	NA	NA	9	NA	NA	9	913.082	0.327491	0	NA	NA	9	NA	NA	9	3.00139	0.0302519	0	NA	NA	9	NA	NA	9	3.83689	0.0040998	0	NA	NA	9	42.7611	0.0435562	0	NA	NA	9	-0.142749	0.0375632	0	NA	NA	9	0.101377	0.035212	0	0.178405	0.0384239	0	305.146
2010-01-17 22:30:00	NA	NA	9	NA	NA	9	912.646	0.35727	0	NA	NA	9	NA	NA	9	3.07377	0.0357456	0	NA	NA	9	NA	NA	9	3.84231	0.00411341	0	NA	NA	9	42.7337	0.0476583	0	NA	NA	9	-0.0938649	0.0371255	0	NA	NA	9	0.0610313	0.0317662	0	0.11369	0.0446894	0	301.041
2010-01-17 23:30:00	NA	NA	9	NA	NA	9	912.006	0.347007	0	NA	NA	9	NA	NA	9	3.13483	0.0262746	0	NA	NA	9	NA	NA	9	3.84644	0.00374655	0	NA	NA	9	42.7052	0.053484	0	NA	NA	9	-0.0242707	0.0158013	0	NA	NA	9	0.0110584	0.0126068	0	0.0287005	0.0172101	0	290.101
2010-01-18 00:30:00	NA	NA	9	NA	NA	9	911.445	0.32958	0	NA	NA	9	NA	NA	9	3.10914	0.0287432	0	NA	NA	9	NA	NA	9	3.84528	0.0054638	0	NA	NA	9	42.7249	0.054345	0	NA	NA	9	0.0219074	0.0355139	0	NA	NA	9	0.0292136	0.0257853	0	0.0474633	0.0317209	0	139.515
2010-01-18 01:30:00	NA	NA	9	NA	NA	9	910.97	0.377938	0	NA	NA	9	NA	NA	9	3.03804	0.016594	0	NA	NA	9	NA	NA	9	3.84078	0.00428645	0	NA	NA	9	42.7627	0.049359	0	NA	NA	9	0.0241266	0.0222211	0	NA	NA	9	0.00770098	0.0132173	0	0.0309296	0.0187898	0	108.687
2010-01-18 02:30:00	NA	NA	9	NA	NA	9	910.476	0.381212	0	NA	NA	9	NA	NA	9	3.00383	0.0213023	0	NA	NA	9	NA	NA	9	3.83853	0.0034235	0	NA	NA	9	42.78	0.0455622	0	NA	NA	9	0.0493868	0.0208434	0	NA	NA	9	0.00536487	0.012146	0	0.0519043	0.0188582	0	90.9568
2010-01-18 03:30:00	NA	NA	9	NA	NA	9	910.212	0.302558	0	NA	NA	9	NA	NA	9	2.96733	0.0132869	0	NA	NA	9	NA	NA	9	3.83765	0.00419041	0	NA	NA	9	42.8174	0.0549198	0	NA	NA	9	-0.00758527	0.0175129	0	NA	NA	9	0.00583951	0.0096228	0	0.0194621	0.0105831	0	215.846
2010-01-18 04:30:00	NA	NA	9	NA	NA	9	910.149	0.319616	0	NA	NA	9	NA	NA	9	2.98474	0.0132552	0	NA	NA	9	NA	NA	9	3.83724	0.00398859	0	NA	NA	9	42.7893	0.0521355	0	NA	NA	9	-0.0198232	0.00511817	0	NA	NA	9	0.0212826	0.00534275	0	0.029585	0.00503565	0	316.705
2010-01-18 05:30:00	NA	NA	9	NA	NA	9	910.478	0.307053	0	NA	NA	9	NA	NA	9	2.98181	0.0196027	0	NA	NA	9	NA	NA	9	3.83766	0.00427557	0	NA	NA	9	42.7983	0.0556529	0	NA	NA	9	-0.0215164	0.00606786	0	NA	NA	9	0.0282837	0.0144178	0	0.03678	0.0124415	0	318.694
2010-01-18 06:30:00	NA	NA	9	NA	NA	9	910.969	0.352467	0	NA	NA	9	NA	NA	9	2.98573	0.0184115	0	NA	NA	9	NA	NA	9	3.84059	0.00441079	0	NA	NA	9	42.8294	0.0572025	0	NA	NA	9	-0.0101046	0.00988063	0	NA	NA	9	0.00323795	0.00697557	0	0.0145055	0.00695761	0	259.994
2010-01-18 07:30:00	NA	NA	9	NA	NA	9	911.629	0.36732	0	NA	NA	9	NA	NA	9	3.00154	0.0148185	0	NA	NA	9	NA	NA	9	3.83851	0.00420099	0	NA	NA	9	42.7821	0.0528572	0	NA	NA	9	-0.0307523	0.00815042	0	NA	NA	9	0.0246937	0.0135067	0	0.0400986	0.0140147	0	306.556
2010-01-18 08:30:00	NA	NA	9	NA	NA	9	912.377	0.432922	0	NA	NA	9	NA	NA	9	2.92903	0.0531368	0	NA	NA	9	NA	NA	9	3.83102	0.00530362	0	NA	NA	9	42.7837	0.0472243	0	NA	NA	9	-0.0758752	0.0255073	0	NA	NA	9	0.0685192	0.0251246	0	0.104161	0.0297318	0	312.132
2010-01-18 09:30:00	NA	NA	9	NA	NA	9	912.897	0.311886	0	NA	NA	9	NA	NA	9	2.88614	0.0244866	0	NA	NA	9	NA	NA	9	3.82989	0.00362571	0	NA	NA	9	42.8259	0.0498955	0	NA	NA	9	-0.0329672	0.0312621	0	NA	NA	9	0.0571259	0.0320511	0	0.0708482	0.0365371	0	289.056
2010-01-18 10:30:00	NA	NA	9	NA	NA	9	912.974	0.302669	0	NA	NA	9	NA	NA	9	2.89088	0.0244087	0	NA	NA	9	NA	NA	9	3.83106	0.00378387	0	NA	NA	9	42.8342	0.0519549	0	NA	NA	9	-0.0388153	0.0163193	0	NA	NA	9	0.0287333	0.0143755	0	0.0498588	0.0178668	0	305.101
2010-01-18 11:30:00	NA	NA	9	NA	NA	9	912.715	0.285596	0	NA	NA	9	NA	NA	9	2.97056	0.0209905	0	NA	NA	9	NA	NA	9	3.83527	0.00321229	0	NA	NA	9	42.7818	0.0394557	0	NA	NA	9	-0.0859863	0.0330629	0	NA	NA	9	0.0565992	0.0310058	0	0.105351	0.0394019	0	301.138
2010-01-18 12:30:00	NA	NA	9	NA	NA	9	912.302	0.34189	0	NA	NA	9	NA	NA	9	3.00907	0.0262691	0	NA	NA	9	NA	NA	9	3.83882	0.00385945	0	NA	NA	9	42.7756	0.0434465	0	NA	NA	9	-0.0507742	0.0251827	0	NA	NA	9	0.0354454	0.0227118	0	0.0644866	0.0287348	0	302.48
2010-01-18 13:30:00	NA	NA	9	NA	NA	9	911.774	0.297048	0	NA	NA	9	NA	NA	9	3.04845	0.0165806	0	NA	NA	9	NA	NA	9	3.84188	0.00372343	0	NA	NA	9	42.7622	0.0460803	0	NA	NA	9	-0.0440765	0.0189984	0	NA	NA	9	0.0344501	0.0175488	0	0.0566919	0.0241749	0	306.557
2010-01-18 14:30:00	NA	NA	9	NA	NA	9	911.42	0.309456	0	NA	NA	9	NA	NA	9	3.03455	0.0405056	0	NA	NA	9	NA	NA	9	3.84093	0.00516135	0	NA	NA	9	42.7689	0.0535029	0	NA	NA	9	0.0214263	0.048815	0	NA	NA	9	0.0037737	0.0204079	0	0.0498985	0.0279595	0	207.614
2010-01-18 15:30:00	NA	NA	9	NA	NA	9	911.427	0.302271	0	NA	NA	9	NA	NA	9	2.93123	0.0153446	0	NA	NA	9	NA	NA	9	3.83613	0.00431382	0	NA	NA	9	42.8454	0.0598562	0	NA	NA	9	0.0225248	0.0222343	0	NA	NA	9	0.0130467	0.0162613	0	0.0356945	0.0127257	0	135.411
2010-01-18 16:30:00	NA	NA	9	NA	NA	9	911.411	0.286527	0	NA	NA	9	NA	NA	9	2.92508	0.0246846	0	NA	NA	9	NA	NA	9	3.83403	0.00368633	0	NA	NA	9	42.8272	0.0509328	0	NA	NA	9	-0.00182951	0.0166132	0	NA	NA	9	0.0144506	0.012675	0	0.0221642	0.0125463	0	181.609
2010-01-18 17:30:00	NA	NA	9	NA	NA	9	911.595	0.310211	0	NA	NA	9	NA	NA	9	2.90826	0.0185212	0	NA	NA	9	NA	NA	9	3.83422	0.00447761	0	NA	NA	9	42.8518	0.0590226	0	NA	NA	9	-0.0175052	0.00874653	0	NA	NA	9	0.00655279	0.00912722	0	0.0203568	0.00973361	0	288.331
2010-01-18 18:30:00	NA	NA	9	NA	NA	9	911.844	0.323166	0	NA	NA	9	NA	NA	9	2.94658	0.0191115	0	NA	NA	9	NA	NA	9	3.83561	0.00423206	0	NA	NA	9	42.8182	0.0584228	0	NA	NA	9	-0.0168028	0.0105449	0	NA	NA	9	0.0121559	0.00927671	0	0.0218461	0.0122506	0	307.854
2010-01-18 19:30:00	NA	NA	9	NA	NA	9	912.274	0.316453	0	NA	NA	9	NA	NA	9	2.97936	0.020404	0	NA	NA	9	NA	NA	9	3.83777	0.00427017	0	NA	NA	9	42.8018	0.0515199	0	NA	NA	9	-0.027819	0.0101692	0	NA	NA	9	0.0214865	0.0124354	0	0.0359011	0.0143073	0	306.068
2010-01-18 20:30:00	NA	NA	9	NA	NA	9	912.592	0.314534	0	NA	NA	9	NA	NA	9	3.02953	0.0205971	0	NA	NA	9	NA	NA	9	3.84133	0.00470521	0	NA	NA	9	42.7798	0.0538966	0	NA	NA	9	-0.0206563	0.0110087	0	NA	NA	9	0.013727	0.0155362	0	0.0292299	0.0110978	0	301.986
2010-01-18 21:30:00	NA	NA	9	NA	NA	9	912.716	0.340416	0	NA	NA	9	NA	NA	9	3.0633	0.0408062	0	NA	NA	9	NA	NA	9	3.84468	0.00504144	0	NA	NA	9	42.777	0.0533935	0	NA	NA	9	-0.0325241	0.0105092	0	NA	NA	9	0.0311944	0.0166224	0	0.0463597	0.016382	0	310.758
2010-01-18 22:30:00	NA	NA	9	NA	NA	9	912.431	0.360914	0	NA	NA	9	NA	NA	9	3.16194	0.0252018	0	NA	NA	9	NA	NA	9	3.85011	0.00454214	0	NA	NA	9	42.7149	0.0516734	0	NA	NA	9	-0.0168855	0.0117424	0	NA	NA	9	0.0155321	0.0150281	0	0.0256385	0.0152542	0	287.76
2010-01-18 23:30:00	NA	NA	9	NA	NA	9	912.061	0.328166	0	NA	NA	9	NA	NA	9	3.1799	0.0129905	0	NA	NA	9	NA	NA	9	3.85151	0.0045009	0	NA	NA	9	42.709	0.0526782	0	NA	NA	9	-0.0291232	0.0103689	0	NA	NA	9	0.0241784	0.015437	0	0.0386974	0.0167643	0	306.193
2010-01-19 00:30:00	NA	NA	9	NA	NA	9	911.656	0.313889	0	NA	NA	9	NA	NA	9	3.16986	0.0870575	0	NA	NA	9	NA	NA	9	3.84975	0.00727965	0	NA	NA	9	42.7006	0.0571347	0	NA	NA	9	0.0287294	0.0416478	0	NA	NA	9	0.0293148	0.0225881	0	0.0581103	0.0234892	0	159.611
2010-01-19 01:30:00	NA	NA	9	NA	NA	9	911.25	0.347387	0	NA	NA	9	NA	NA	9	3.02871	0.0126324	0	NA	NA	9	NA	NA	9	3.84261	0.00450776	0	NA	NA	9	42.7978	0.0590392	0	NA	NA	9	-0.00626095	0.0255029	0	NA	NA	9	0.0255073	0.0120556	0	0.0347509	0.0166627	0	282.731
2010-01-19 02:30:00	NA	NA	9	NA	NA	9	910.68	0.32519	0	NA	NA	9	NA	NA	9	3.04626	0.0137987	0	NA	NA	9	NA	NA	9	3.84307	0.00425243	0	NA	NA	9	42.7807	0.0566941	0	NA	NA	9	-0.0226047	0.00607611	0	NA	NA	9	0.00834801	0.00629168	0	0.0251404	0.00501003	0	291.427
2010-01-19 03:30:00	NA	NA	9	NA	NA	9	910.22	0.322401	0	NA	NA	9	NA	NA	9	3.05943	0.0132893	0	NA	NA	9	NA	NA	9	3.84535	0.00460047	0	NA	NA	9	42.7921	0.0573653	0	NA	NA	9	-0.0213991	0.00605216	0	NA	NA	9	0.0102966	0.0068707	0	0.0246625	0.00628605	0	292.211
2010-01-19 04:30:00	NA	NA	9	NA	NA	9	910.259	0.343006	0	NA	NA	9	NA	NA	9	3.04093	0.055253	0	NA	NA	9	NA	NA	9	3.84072	0.00585679	0	NA	NA	9	42.7586	0.051853	0	NA	NA	9	-0.0266814	0.0253095	0	NA	NA	9	0.0291184	0.02623	0	0.0454517	0.0286744	0	294.03
2010-01-19 05:30:00	NA	NA	9	NA	NA	9	910.586	0.313811	0	NA	NA	9	NA	NA	9	2.96634	0.0199968	0	NA	NA	9	NA	NA	9	3.83574	0.00375429	0	NA	NA	9	42.7946	0.0458907	0	NA	NA	9	-0.0378976	0.0112673	0	NA	NA	9	0.0406144	0.0263253	0	0.0575788	0.0242959	0	313.2
2010-01-19 06:30:00	NA	NA	9	NA	NA	9	910.979	0.317151	0	NA	NA	9	NA	NA	9	2.96564	0.0152514	0	NA	NA	9	NA	NA	9	3.83653	0.00387863	0	NA	NA	9	42.8052	0.0516131	0	NA	NA	9	-0.0157852	0.019364	0	NA	NA	9	0.0112695	0.00791976	0	0.0264364	0.0107146	0	267.319
2010-01-19 07:30:00	NA	NA	9	NA	NA	9	911.605	0.385764	0	NA	NA	9	NA	NA	9	2.95966	0.0157081	0	NA	NA	9	NA	NA	9	3.83793	0.00424757	0	NA	NA	9	42.8302	0.0521074	0	NA	NA	9	0.0339082	0.0207275	0	NA	NA	9	0.0040478	0.015207	0	0.0377903	0.0199694	0	92.595
2010-01-19 08:30:00	NA	NA	9	NA	NA	9	912.323	0.341487	0	NA	NA	9	NA	NA	9	2.91237	0.014293	0	NA	NA	9	NA	NA	9	3.83333	0.003917	0	NA	NA	9	42.8347	0.050309	0	NA	NA	9	0.0390302	0.0142179	0	NA	NA	9	0.0264161	0.0209957	0	0.0499158	0.0192975	0	62.6986
2010-01-19 09:30:00	NA	NA	9	NA	NA	9	912.592	0.311971	0	NA	NA	9	NA	NA	9	2.93006	0.0101488	0	NA	NA	9	NA	NA	9	3.83658	0.00426771	0	NA	NA	9	42.8519	0.0546275	0	NA	NA	9	0.00261798	0.0214461	0	NA	NA	9	0.0167155	0.00674751	0	0.0267755	0.00863473	0	203.919
2010-01-19 10:30:00	NA	NA	9	NA	NA	9	912.809	0.295166	0	NA	NA	9	NA	NA	9	2.93546	0.00923497	0	NA	NA	9	NA	NA	9	3.83522	0.00347743	0	NA	NA	9	42.8275	0.0456738	0	NA	NA	9	-0.0343569	0.0124669	0	NA	NA	9	0.0252766	0.0122781	0	0.0431843	0.0161421	0	305.476
2010-01-19 11:30:00	NA	NA	9	NA	NA	9	912.792	0.276499	0	NA	NA	9	NA	NA	9	2.9702	0.0333836	0	NA	NA	9	NA	NA	9	3.83648	0.00371626	0	NA	NA	9	42.7974	0.0448761	0	NA	NA	9	-0.0419027	0.0220085	0	NA	NA	9	0.0138681	0.0199756	0	0.0472495	0.0244723	0	285.915
2010-01-19 12:30:00	NA	NA	9	NA	NA	9	912.417	0.352518	0	NA	NA	9	NA	NA	9	3.03764	0.0243386	0	NA	NA	9	NA	NA	9	3.84097	0.00338704	0	NA	NA	9	42.7647	0.0411123	0	NA	NA	9	-0.0474871	0.0264358	0	NA	NA	9	0.0251834	0.0217385	0	0.0567522	0.0289767	0	297.145
2010-01-19 13:30:00	NA	NA	9	NA	NA	9	911.867	0.34247	0	NA	NA	9	NA	NA	9	3.11603	0.0243319	0	NA	NA	9	NA	NA	9	3.84827	0.00499532	0	NA	NA	9	42.7528	0.051346	0	NA	NA	9	-0.0160529	0.0104256	0	NA	NA	9	0.0205346	0.0177081	0	0.0276375	0.0183783	0	305.893
2010-01-19 14:30:00	NA	NA	9	NA	NA	9	911.52	0.343933	0	NA	NA	9	NA	NA	9	3.11716	0.0203641	0	NA	NA	9	NA	NA	9	3.84721	0.00398538	0	NA	NA	9	42.7383	0.0445211	0	NA	NA	9	-0.00459477	0.0176423	0	NA	NA	9	0.0240151	0.0210604	0	0.0336138	0.0149147	0	162.837
2010-01-19 15:30:00	NA	NA	9	NA	NA	9	911.201	0.281492	0	NA	NA	9	NA	NA	9	3.05658	0.0457603	0	NA	NA	9	NA	NA	9	3.84293	0.00511333	0	NA	NA	9	42.765	0.0505411	0	NA	NA	9	0.0390973	0.030855	0	NA	NA	9	-6.75398e-05	0.0245137	0	0.0487161	0.026605	0	113.749
2010-01-19 16:30:00	NA	NA	9	NA	NA	9	911.247	0.321499	0	NA	NA	9	NA	NA	9	2.98072	0.0129578	0	NA	NA	9	NA	NA	9	3.83819	0.00336396	0	NA	NA	9	42.8058	0.0428101	0	NA	NA	9	0.0473438	0.0212141	0	NA	NA	9	0.00568583	0.0171065	0	0.0508702	0.0206999	0	88.4456
2010-01-19 17:30:00	NA	NA	9	NA	NA	9	911.397	0.300692	0	NA	NA	9	NA	NA	9	2.95967	0.0170359	0	NA	NA	9	NA	NA	9	3.83651	0.00395539	0	NA	NA	9	42.8125	0.0497486	0	NA	NA	9	0.0278957	0.0321927	0	NA	NA	9	-0.00114328	0.0151557	0	0.0365341	0.0266551	0	135.141
2010-01-19 18:30:00	NA	NA	9	NA	NA	9	911.581	0.322746	0	NA	NA	9	NA	NA	9	2.94382	0.00970596	0	NA	NA	9	NA	NA	9	3.83726	0.00405129	0	NA	NA	9	42.8428	0.0540999	0	NA	NA	9	0.00779137	0.0102809	0	NA	NA	9	-0.00171357	0.0125089	0	0.0161885	0.00797699	0	136.742
2010-01-19 19:30:00	NA	NA	9	NA	NA	9	912.041	0.350213	0	NA	NA	9	NA	NA	9	2.94212	0.00931493	0	NA	NA	9	NA	NA	9	3.83971	0.0046142	0	NA	NA	9	42.8755	0.0600251	0	NA	NA	9	0.00919105	0.00751286	0	NA	NA	9	0.0126471	0.00695794	0	0.016901	0.00797587	0	104.921
2010-01-19 20:30:00	NA	NA	9	NA	NA	9	912.396	0.317974	0	NA	NA	9	NA	NA	9	2.94986	0.0121634	0	NA	NA	9	NA	NA	9	3.836	0.00368518	0	NA	NA	9	42.8185	0.0471008	0	NA	NA	9	-0.00942224	0.00799093	0	NA	NA	9	0.0378599	0.00698488	0	0.0397717	0.00727807	0	337.141
2010-01-19 21:30:00	NA	NA	9	NA	NA	9	912.55	0.280851	0	NA	NA	9	NA	NA	9	2.95773	0.0123447	0	NA	NA	9	NA	NA	9	3.83808	0.00431185	0	NA	NA	9	42.834	0.0543092	0	NA	NA	9	-0.0215923	0.00591141	0	NA	NA	9	0.0154759	0.00537779	0	0.0267532	0.00733878	0	305.413
2010-01-19 22:30:00	NA	NA	9	NA	NA	9	913.045	0.319772	0	NA	NA	9	NA	NA	9	2.80741	0.0309439	0	NA	NA	9	NA	NA	9	3.823	0.00361968	0	NA	NA	9	42.8436	0.0450043	0	NA	NA	9	-0.0803956	0.0240856	0	NA	NA	9	0.0574754	0.022024	0	0.100893	0.0255437	0	305.506
2010-01-19 23:30:00	NA	NA	9	NA	NA	9	912.953	0.36294	0	NA	NA	9	NA	NA	9	2.80811	0.0149336	0	NA	NA	9	NA	NA	9	3.82413	0.00335353	0	NA	NA	9	42.8569	0.043315	0	NA	NA	9	-0.091128	0.0357409	0	NA	NA	9	0.0571791	0.0302355	0	0.110166	0.0403552	0	299.614
2010-01-20 00:30:00	NA	NA	9	NA	NA	9	912.29	0.415035	0	NA	NA	9	NA	NA	9	2.97952	0.0706784	0	NA	NA	9	NA	NA	9	3.8371	0.00636016	0	NA	NA	9	42.7931	0.0473233	0	NA	NA	9	-0.0451377	0.0211907	0	NA	NA	9	0.0483766	0.0241629	0	0.0685981	0.0265467	0	312.1
2010-01-20 01:30:00	NA	NA	9	NA	NA	9	911.759	0.34582	0	NA	NA	9	NA	NA	9	2.9883	0.108952	0	NA	NA	9	NA	NA	9	3.83736	0.00860308	0	NA	NA	9	42.7851	0.0622839	0	NA	NA	9	-0.0938981	0.049754	0	NA	NA	9	0.0642861	0.0330639	0	0.116276	0.0547518	0	305.957
2010-01-20 02:30:00	NA	NA	9	NA	NA	9	911.27	0.350427	0	NA	NA	9	NA	NA	9	2.95098	0.0398432	0	NA	NA	9	NA	NA	9	3.83551	0.00419236	0	NA	NA	9	42.8116	0.0410205	0	NA	NA	9	-0.130927	0.0345765	0	NA	NA	9	0.0979116	0.038227	0	0.166705	0.0399271	0	306.033
2010-01-20 03:30:00	NA	NA	9	NA	NA	9	910.715	0.338094	0	NA	NA	9	NA	NA	9	3.03883	0.020077	0	NA	NA	9	NA	NA	9	3.84115	0.00333764	0	NA	NA	9	42.7664	0.0401567	0	NA	NA	9	-0.0979591	0.0410892	0	NA	NA	9	0.0565162	0.0327815	0	0.116184	0.0453188	0	298.174
2010-01-20 04:30:00	NA	NA	9	NA	NA	9	910.474	0.357854	0	NA	NA	9	NA	NA	9	3.03631	0.0255273	0	NA	NA	9	NA	NA	9	3.84267	0.00383011	0	NA	NA	9	42.789	0.0546147	0	NA	NA	9	-0.00524609	0.0355031	0	NA	NA	9	0.0557333	0.016948	0	0.0660017	0.0180146	0	178.038
2010-01-20 05:30:00	NA	NA	9	NA	NA	9	910.583	0.346875	0	NA	NA	9	NA	NA	9	3.02269	0.0196776	0	NA	NA	9	NA	NA	9	3.84261	0.00399907	0	NA	NA	9	42.8061	0.0490105	0	NA	NA	9	0.020646	0.0200695	0	NA	NA	9	0.0283659	0.0179863	0	0.0397159	0.0194841	0	95.4037
2010-01-20 06:30:00	NA	NA	9	NA	NA	9	910.816	0.331408	0	NA	NA	9	NA	NA	9	3.0029	0.0125747	0	NA	NA	9	NA	NA	9	3.84217	0.00442282	0	NA	NA	9	42.8265	0.0585812	0	NA	NA	9	0.00294019	0.0136049	0	NA	NA	9	0.0288195	0.0141697	0	0.0325611	0.012835	0	153.577
2010-01-20 07:30:00	NA	NA	9	NA	NA	9	911.346	0.407142	0	NA	NA	9	NA	NA	9	2.98216	0.0425418	0	NA	NA	9	NA	NA	9	3.83914	0.0054543	0	NA	NA	9	42.8158	0.0565321	0	NA	NA	9	-0.00678377	0.015998	0	NA	NA	9	0.0179064	0.0150186	0	0.0269349	0.0110663	0	220.461
2010-01-20 08:30:00	NA	NA	9	NA	NA	9	912.079	0.37508	0	NA	NA	9	NA	NA	9	2.90421	0.0290489	0	NA	NA	9	NA	NA	9	3.83401	0.0042018	0	NA	NA	9	42.8542	0.0634089	0	NA	NA	9	0.0432327	0.0222193	0	NA	NA	9	0.0179528	0.0107125	0	0.0486993	0.0206906	0	67.1205
2010-01-20 09:30:00	NA	NA	9	NA	NA	9	912.552	0.323554	0	NA	NA	9	NA	NA	9	2.88113	0.00952487	0	NA	NA	9	NA	NA	9	3.83414	0.00399264	0	NA	NA	9	42.8862	0.0520628	0	NA	NA	9	-0.0126589	0.0121391	0	NA	NA	9	0.0159522	0.00588776	0	0.0237466	0.00572373	0	251.39
2010-01-20 10:30:00	NA	NA	9	NA	NA	9	912.895	0.310739	0	NA	NA	9	NA	NA	9	2.90206	0.0276584	0	NA	NA	9	NA	NA	9	3.83451	0.00474443	0	NA	NA	9	42.8628	0.0489316	0	NA	NA	9	-0.0164251	0.00974549	0	NA	NA	9	0.0302851	0.0165848	0	0.0376548	0.0117893	0	319.291
2010-01-20 11:30:00	NA	NA	9	NA	NA	9	913.012	0.323584	0	NA	NA	9	NA	NA	9	2.89066	0.0161087	0	NA	NA	9	NA	NA	9	3.83392	0.00400865	0	NA	NA	9	42.8704	0.0483069	0	NA	NA	9	-0.00899161	0.0133252	0	NA	NA	9	0.00722117	0.0115133	0	0.0196728	0.00747998	0	251.759
2010-01-20 12:30:00	NA	NA	9	NA	NA	9	912.86	0.349212	0	NA	NA	9	NA	NA	9	2.89612	0.0165467	0	NA	NA	9	NA	NA	9	3.83451	0.00414454	0	NA	NA	9	42.8707	0.0516957	0	NA	NA	9	-0.024613	0.0121256	0	NA	NA	9	0.0116648	0.0165875	0	0.0315816	0.0129036	0	287.199
2010-01-20 13:30:00	NA	NA	9	NA	NA	9	912.408	0.369844	0	NA	NA	9	NA	NA	9	2.93041	0.0169261	0	NA	NA	9	NA	NA	9	3.8367	0.0043038	0	NA	NA	9	42.8531	0.0531701	0	NA	NA	9	-0.026889	0.0062847	0	NA	NA	9	0.0190133	0.0056565	0	0.0332231	0.00722726	0	305.177
2010-01-20 14:30:00	NA	NA	9	NA	NA	9	911.907	0.327726	0	NA	NA	9	NA	NA	9	2.99121	0.0228206	0	NA	NA	9	NA	NA	9	3.84115	0.00411071	0	NA	NA	9	42.8286	0.0552771	0	NA	NA	9	-0.0352228	0.00657152	0	NA	NA	9	0.0335496	0.00927276	0	0.0490108	0.00965971	0	313.064
2010-01-20 15:30:00	NA	NA	9	NA	NA	9	911.637	0.320297	0	NA	NA	9	NA	NA	9	2.96339	0.0309308	0	NA	NA	9	NA	NA	9	3.83614	0.00343009	0	NA	NA	9	42.8028	0.0471989	0	NA	NA	9	-0.0692922	0.0206031	0	NA	NA	9	0.0601185	0.0219594	0	0.0931454	0.0254194	0	310.597
2010-01-20 16:30:00	NA	NA	9	NA	NA	9	911.385	0.327638	0	NA	NA	9	NA	NA	9	2.9287	0.0135758	0	NA	NA	9	NA	NA	9	3.83415	0.00296368	0	NA	NA	9	42.824	0.0380654	0	NA	NA	9	-0.0554237	0.0265646	0	NA	NA	9	0.0304502	0.0217	0	0.0655409	0.0296614	0	293.819
2010-01-20 17:30:00	NA	NA	9	NA	NA	9	911.115	0.293777	0	NA	NA	9	NA	NA	9	2.99261	0.041235	0	NA	NA	9	NA	NA	9	3.84041	0.00464473	0	NA	NA	9	42.8179	0.052488	0	NA	NA	9	-0.028077	0.0195246	0	NA	NA	9	0.0324125	0.0188529	0	0.0465174	0.0202849	0	298.838
2010-01-20 18:30:00	NA	NA	9	NA	NA	9	911.055	0.297126	0	NA	NA	9	NA	NA	9	3.07419	0.0324713	0	NA	NA	9	NA	NA	9	3.84617	0.00475293	0	NA	NA	9	42.7823	0.0486985	0	NA	NA	9	-0.0183285	0.0207266	0	NA	NA	9	0.0254451	0.0198602	0	0.0384292	0.018175	0	270.767
2010-01-20 19:30:00	NA	NA	9	NA	NA	9	911.424	0.322228	0	NA	NA	9	NA	NA	9	3.04994	0.0160633	0	NA	NA	9	NA	NA	9	3.84545	0.0045167	0	NA	NA	9	42.8051	0.0565715	0	NA	NA	9	0.00995226	0.022766	0	NA	NA	9	0.00859078	0.0164601	0	0.0267714	0.0156545	0	174.31
2010-01-20 20:30:00	NA	NA	9	NA	NA	9	911.848	0.322954	0	NA	NA	9	NA	NA	9	3.0093	0.0177362	0	NA	NA	9	NA	NA	9	3.84234	0.00440298	0	NA	NA	9	42.8196	0.0541596	0	NA	NA	9	0.033114	0.0210267	0	NA	NA	9	0.0198182	0.0171327	0	0.042609	0.0202297	0	72.8637
2010-01-20 21:30:00	NA	NA	9	NA	NA	9	912.286	0.32601	0	NA	NA	9	NA	NA	9	2.97107	0.00955808	0	NA	NA	9	NA	NA	9	3.83993	0.00388617	0	NA	NA	9	42.8397	0.05035	0	NA	NA	9	0.0234674	0.0163226	0	NA	NA	9	-0.00443434	0.0111437	0	0.0276399	0.0140329	0	113.947
2010-01-20 22:30:00	NA	NA	9	NA	NA	9	912.504	0.298805	0	NA	NA	9	NA	NA	9	2.94925	0.0117228	0	NA	NA	9	NA	NA	9	3.83974	0.00424521	0	NA	NA	9	42.8661	0.0568654	0	NA	NA	9	0.0105271	0.0206581	0	NA	NA	9	-0.00325279	0.00877805	0	0.0207962	0.0138765	0	171.341
2010-01-20 23:30:00	NA	NA	9	NA	NA	9	912.5	0.344254	0	NA	NA	9	NA	NA	9	2.94519	0.00961549	0	NA	NA	9	NA	NA	9	3.84009	0.00385975	0	NA	NA	9	42.8758	0.0512866	0	NA	NA	9	-0.0102605	0.00503682	0	NA	NA	9	0.00380719	0.00692158	0	0.0127886	0.00542943	0	276.142
2010-01-21 00:30:00	NA	NA	9	NA	NA	9	912.348	0.330943	0	NA	NA	9	NA	NA	9	2.92912	0.0252711	0	NA	NA	9	NA	NA	9	3.83834	0.00512699	0	NA	NA	9	42.8754	0.054763	0	NA	NA	9	0.0107245	0.0215229	0	NA	NA	9	0.0115976	0.00582505	0	0.0225631	0.0154094	0	215.228
2010-01-21 01:30:00	NA	NA	9	NA	NA	9	912.199	0.327265	0	NA	NA	9	NA	NA	9	2.85476	0.0285532	0	NA	NA	9	NA	NA	9	3.82898	0.00404599	0	NA	NA	9	42.8565	0.0450144	0	NA	NA	9	0.0200079	0.025184	0	NA	NA	9	0.00376069	0.0205393	0	0.0336927	0.018302	0	143.366
2010-01-21 02:30:00	NA	NA	9	NA	NA	9	911.761	0.370428	0	NA	NA	9	NA	NA	9	2.83055	0.0123493	0	NA	NA	9	NA	NA	9	3.82947	0.00394197	0	NA	NA	9	42.895	0.0504825	0	NA	NA	9	-0.00236659	0.0171013	0	NA	NA	9	0.0261074	0.0156065	0	0.0317149	0.0147379	0	184.691
2010-01-21 03:30:00	NA	NA	9	NA	NA	9	911.254	0.302515	0	NA	NA	9	NA	NA	9	2.82664	0.0144442	0	NA	NA	9	NA	NA	9	3.8282	0.00409896	0	NA	NA	9	42.8846	0.0521886	0	NA	NA	9	-0.02184	0.00950457	0	NA	NA	9	0.0130017	0.00788825	0	0.0263448	0.0102233	0	300.388
2010-01-21 04:30:00	NA	NA	9	NA	NA	9	910.943	0.305861	0	NA	NA	9	NA	NA	9	2.8685	0.0229041	0	NA	NA	9	NA	NA	9	3.83249	0.00459314	0	NA	NA	9	42.8832	0.0531981	0	NA	NA	9	-0.0304766	0.0151471	0	NA	NA	9	0.00221208	0.0137958	0	0.0337974	0.0145292	0	277.429
2010-01-21 05:30:00	NA	NA	9	NA	NA	9	910.913	0.320573	0	NA	NA	9	NA	NA	9	2.90248	0.0139641	0	NA	NA	9	NA	NA	9	3.83588	0.00436776	0	NA	NA	9	42.8806	0.0554292	0	NA	NA	9	0.0117175	0.0243136	0	NA	NA	9	0.0178976	0.021923	0	0.0352764	0.016868	0	163.603
2010-01-21 06:30:00	NA	NA	9	NA	NA	9	911.027	0.314196	0	NA	NA	9	NA	NA	9	2.86945	0.015656	0	NA	NA	9	NA	NA	9	3.83296	0.00405019	0	NA	NA	9	42.8877	0.0546366	0	NA	NA	9	1.51623e-05	0.0267439	0	NA	NA	9	0.0187138	0.0108939	0	0.032239	0.0120159	0	193.276
2010-01-21 07:30:00	NA	NA	9	NA	NA	9	911.559	0.349096	0	NA	NA	9	NA	NA	9	2.80596	0.0239874	0	NA	NA	9	NA	NA	9	3.82421	0.00345799	0	NA	NA	9	42.8617	0.0440862	0	NA	NA	9	-0.119013	0.048142	0	NA	NA	9	0.0667055	0.0404864	0	0.139003	0.0569939	0	296.066
2010-01-21 08:30:00	NA	NA	9	NA	NA	9	912.071	0.3458	0	NA	NA	9	NA	NA	9	2.83433	0.0132324	0	NA	NA	9	NA	NA	9	3.82676	0.00304444	0	NA	NA	9	42.8557	0.0401454	0	NA	NA	9	-0.0777251	0.0511848	0	NA	NA	9	0.0383644	0.0371165	0	0.0904763	0.057656	0	285.89
2010-01-21 09:30:00	NA	NA	9	NA	NA	9	912.54	0.320632	0	NA	NA	9	NA	NA	9	2.84644	0.0113333	0	NA	NA	9	NA	NA	9	3.82757	0.00274286	0	NA	NA	9	42.8496	0.0377942	0	NA	NA	9	-0.0756657	0.0362776	0	NA	NA	9	0.0409885	0.0306971	0	0.0888013	0.042164	0	293.634
2010-01-21 10:30:00	NA	NA	9	NA	NA	9	912.79	0.317522	0	NA	NA	9	NA	NA	9	2.90422	0.0327684	0	NA	NA	9	NA	NA	9	3.8327	0.00432607	0	NA	NA	9	42.8373	0.0455677	0	NA	NA	9	-0.0416935	0.0238177	0	NA	NA	9	0.0229415	0.0190658	0	0.0494583	0.0273718	0	297.512
2010-01-21 11:30:00	NA	NA	9	NA	NA	9	912.864	0.30662	0	NA	NA	9	NA	NA	9	2.96039	0.0313237	0	NA	NA	9	NA	NA	9	3.83756	0.0038948	0	NA	NA	9	42.8239	0.0463718	0	NA	NA	9	-0.0412529	0.0152313	0	NA	NA	9	0.0304289	0.0116661	0	0.0521265	0.0166911	0	306.573
2010-01-21 12:30:00	NA	NA	9	NA	NA	9	912.812	0.257141	0	NA	NA	9	NA	NA	9	2.9565	0.0156276	0	NA	NA	9	NA	NA	9	3.83975	0.00431926	0	NA	NA	9	42.8564	0.0592846	0	NA	NA	9	-0.00145893	0.0114221	0	NA	NA	9	0.0154391	0.00847281	0	0.0190541	0.00892298	0	218.889
2010-01-21 13:30:00	NA	NA	9	NA	NA	9	912.655	0.301462	0	NA	NA	9	NA	NA	9	2.92355	0.0208573	0	NA	NA	9	NA	NA	9	3.83616	0.00460184	0	NA	NA	9	42.8552	0.0544228	0	NA	NA	9	0.0283739	0.0154042	0	NA	NA	9	0.0379105	0.0189822	0	0.0507761	0.016171	0	54.5482
2010-01-21 14:30:00	NA	NA	9	NA	NA	9	912.574	0.29247	0	NA	NA	9	NA	NA	9	2.82022	0.0372021	0	NA	NA	9	NA	NA	9	3.82664	0.00540796	0	NA	NA	9	42.8726	0.0473514	0	NA	NA	9	0.0347788	0.0206478	0	NA	NA	9	0.012936	0.0167744	0	0.0419895	0.0179242	0	90.0791
2010-01-21 15:30:00	NA	NA	9	NA	NA	9	912.118	0.312567	0	NA	NA	9	NA	NA	9	2.78409	0.0112059	0	NA	NA	9	NA	NA	9	3.82657	0.00383669	0	NA	NA	9	42.92	0.0517359	0	NA	NA	9	0.0186245	0.0129177	0	NA	NA	9	0.0149226	0.00774643	0	0.0260406	0.0108745	0	64.6356
2010-01-21 16:30:00	NA	NA	9	NA	NA	9	911.76	0.319065	0	NA	NA	9	NA	NA	9	2.76153	0.0103675	0	NA	NA	9	NA	NA	9	3.82401	0.00364386	0	NA	NA	9	42.9181	0.0464117	0	NA	NA	9	-0.0149226	0.0159507	0	NA	NA	9	0.0304609	0.00897742	0	0.0379613	0.00665931	0	253.011
2010-01-21 17:30:00	NA	NA	9	NA	NA	9	911.302	0.288123	0	NA	NA	9	NA	NA	9	2.78578	0.0134059	0	NA	NA	9	NA	NA	9	3.82708	0.00413608	0	NA	NA	9	42.9248	0.0541566	0	NA	NA	9	-0.0163158	0.00420609	0	NA	NA	9	0.0139312	0.00333631	0	0.0217966	0.00374283	0	309.806
2010-01-21 18:30:00	NA	NA	9	NA	NA	9	911.217	0.30797	0	NA	NA	9	NA	NA	9	2.83499	0.0276321	0	NA	NA	9	NA	NA	9	3.83058	0.00501987	0	NA	NA	9	42.9035	0.0532655	0	NA	NA	9	-0.0168168	0.00971407	0	NA	NA	9	0.00998521	0.00665952	0	0.0213036	0.00820605	0	289.37
2010-01-21 19:30:00	NA	NA	9	NA	NA	9	911.471	0.333274	0	NA	NA	9	NA	NA	9	2.84242	0.0171713	0	NA	NA	9	NA	NA	9	3.82815	0.003937	0	NA	NA	9	42.8629	0.0470932	0	NA	NA	9	-0.0427717	0.0439694	0	NA	NA	9	0.0201942	0.0320831	0	0.0535558	0.0482834	0	278.207
2010-01-21 20:30:00	NA	NA	9	NA	NA	9	911.761	0.315017	0	NA	NA	9	NA	NA	9	2.87106	0.0444632	0	NA	NA	9	NA	NA	9	3.8304	0.00446036	0	NA	NA	9	42.853	0.0424224	0	NA	NA	9	-0.0939158	0.0729157	0	NA	NA	9	0.0390945	0.0554516	0	0.112045	0.0786433	0	272.575
2010-01-21 21:30:00	NA	NA	9	NA	NA	9	911.909	0.323687	0	NA	NA	9	NA	NA	9	2.97567	0.0238813	0	NA	NA	3	NA	NA	9	3.83812	0.00347974	0	NA	NA	9	42.8113	0.0422115	0	NA	NA	9	-0.0729844	0.0579703	0	NA	NA	9	0.0300349	0.0445135	0	0.0882799	0.0614541	0	272.011
2010-01-21 22:30:00	NA	NA	9	NA	NA	9	912.179	0.322751	0	NA	NA	9	NA	NA	9	2.98364	0.0232858	0	3.96902	0.00355586	1	NA	NA	9	3.83916	0.0033074	0	NA	NA	9	42.8136	0.0432636	0	NA	NA	9	-0.167229	0.0446654	0	NA	NA	9	0.0846472	0.0430159	0	0.190154	0.0530759	0	294.9
2010-01-21 23:30:00	NA	NA	9	NA	NA	9	912.289	0.301383	0	NA	NA	9	NA	NA	9	3.01793	0.0238693	0	3.97634	0.0102704	1	NA	NA	9	3.84192	0.00381087	0	NA	NA	9	42.8026	0.0446916	0	NA	NA	9	-0.13624	0.0621208	0	NA	NA	9	0.0706169	0.0539797	0	0.15903	0.0709194	0	289.732
2010-01-22 00:30:00	NA	NA	9	NA	NA	9	912.284	0.322418	0	NA	NA	9	NA	NA	9	3.01096	0.0252168	0	4.05348	0.0306347	1	NA	NA	9	3.84086	0.00340012	0	NA	NA	9	42.7986	0.0397676	0	NA	NA	9	-0.127796	0.0466666	0	NA	NA	9	0.0798099	0.0402847	0	0.15377	0.0534458	0	299.337
2010-01-22 01:30:00	NA	NA	9	NA	NA	9	911.86	0.335127	0	NA	NA	9	NA	NA	9	3.11604	0.0380547	0	NA	NA	3	NA	NA	9	3.84828	0.00357594	0	NA	NA	9	42.753	0.0459782	0	NA	NA	9	-0.0801695	0.0303214	0	NA	NA	9	0.0796544	0.0297846	0	0.116006	0.0334781	0	313.641
2010-01-22 02:30:00	NA	NA	9	NA	NA	9	911.526	0.300945	0	NA	NA	9	NA	NA	9	3.13186	0.0170667	0	NA	NA	9	NA	NA	9	3.8486	0.00328834	0	NA	NA	9	42.7363	0.038589	0	NA	NA	9	-0.108162	0.0314661	0	NA	NA	9	0.0590275	0.0270468	0	0.12497	0.0358779	0	297.205
2010-01-22 03:30:00	NA	NA	9	NA	NA	9	911.28	0.336513	0	NA	NA	9	NA	NA	9	3.10323	0.00962268	0	NA	NA	9	NA	NA	9	3.84723	0.00331544	0	NA	NA	9	42.7571	0.0440642	0	NA	NA	9	-0.0919814	0.0293269	0	NA	NA	9	0.0568741	0.0218048	0	0.109591	0.0319431	0	301.078
2010-01-22 04:30:00	NA	NA	9	NA	NA	9	911.102	0.318588	0	NA	NA	9	NA	NA	9	2.98634	0.0352122	0	NA	NA	9	NA	NA	9	3.83855	0.00362273	0	NA	NA	9	42.803	0.0477036	0	NA	NA	9	-0.10778	0.0332298	0	NA	NA	9	0.0747242	0.027551	0	0.133013	0.0370241	0	304.378
2010-01-22 05:30:00	NA	NA	9	NA	NA	9	910.93	0.302804	0	NA	NA	9	NA	NA	9	3.00164	0.0318056	0	NA	NA	9	NA	NA	9	3.84066	0.00398415	0	NA	NA	9	42.8093	0.0419592	0	NA	NA	9	-0.0918612	0.0367897	0	NA	NA	9	0.049942	0.0349684	0	0.107933	0.0431166	0	294.576
2010-01-22 06:30:00	NA	NA	9	NA	NA	9	910.786	0.246971	0	NA	NA	9	NA	NA	9	3.08231	0.0138749	0	NA	NA	9	NA	NA	9	3.84605	0.00321175	0	NA	NA	9	42.7702	0.0413261	0	NA	NA	9	-0.0867055	0.032605	0	NA	NA	9	0.0647769	0.0329771	0	0.111818	0.0368872	0	305.574
2010-01-22 07:30:00	NA	NA	9	NA	NA	9	911.001	0.309437	0	NA	NA	9	NA	NA	9	3.14413	0.0306718	0	NA	NA	9	NA	NA	9	3.85045	0.00357305	0	NA	NA	9	42.7436	0.0435151	0	NA	NA	9	-0.0571366	0.036881	0	NA	NA	9	0.0254649	0.0315795	0	0.0678897	0.0407569	0	283.912
2010-01-22 08:30:00	NA	NA	9	NA	NA	9	911.357	0.305765	0	NA	NA	9	NA	NA	9	3.14722	0.035631	0	NA	NA	9	NA	NA	9	3.85011	0.00381297	0	NA	NA	9	42.735	0.0438193	0	NA	NA	9	-0.0726949	0.0386541	0	NA	NA	9	0.0377029	0.0317748	0	0.0856279	0.0433284	0	288.355
2010-01-22 09:30:00	NA	NA	9	NA	NA	9	911.593	0.359326	0	NA	NA	9	NA	NA	9	3.25426	0.0252569	0	NA	NA	9	NA	NA	9	3.85634	0.00357762	0	NA	NA	9	42.6717	0.0432559	0	NA	NA	9	-0.0689305	0.0388391	0	NA	NA	9	0.00637994	0.0356195	0	0.077201	0.0401086	0	275.374
2010-01-22 10:30:00	NA	NA	9	NA	NA	9	911.986	0.369642	0	NA	NA	9	NA	NA	9	3.25871	0.00981791	0	NA	NA	9	NA	NA	9	3.85672	0.00300078	0	NA	NA	9	42.6704	0.0395576	0	NA	NA	9	-0.0548684	0.0384194	0	NA	NA	9	0.0216298	0.0271947	0	0.0633938	0.0409257	0	281.965
2010-01-22 11:30:00	NA	NA	9	NA	NA	9	912.299	0.315327	0	NA	NA	9	NA	NA	9	3.26717	0.0172603	0	NA	NA	9	NA	NA	9	3.85761	0.00345723	0	NA	NA	9	42.6702	0.0424159	0	NA	NA	9	-0.0735259	0.0446228	0	NA	NA	9	-0.011865	0.0339256	0	0.0809149	0.046273	0	265.543
2010-01-22 12:30:00	NA	NA	9	NA	NA	9	912.345	0.332486	0	NA	NA	9	NA	NA	9	3.29935	0.0121585	0	NA	NA	9	NA	NA	9	3.85988	0.00275585	0	NA	NA	9	42.6561	0.0369819	0	NA	NA	9	-0.102349	0.0405685	0	NA	NA	9	-0.0118461	0.0227479	0	0.105577	0.0403992	0	264.115
2010-01-22 13:30:00	NA	NA	9	NA	NA	9	912.28	0.313601	0	NA	NA	9	NA	NA	9	3.28519	0.016076	0	NA	NA	9	NA	NA	9	3.86008	0.00330159	0	NA	NA	9	42.6772	0.0429337	0	NA	NA	9	-0.088725	0.026698	0	NA	NA	9	0.014497	0.0154906	0	0.0911594	0.0269231	0	278.798
2010-01-22 14:30:00	NA	NA	9	NA	NA	9	911.864	0.330314	0	NA	NA	9	NA	NA	9	3.30401	0.0405276	0	NA	NA	9	NA	NA	9	3.86076	0.00475118	0	NA	NA	9	42.6612	0.0538143	0	NA	NA	9	-0.0335116	0.0555746	0	NA	NA	9	0.0237494	0.0173163	0	0.0656982	0.0275272	0	235.726
2010-01-22 15:30:00	NA	NA	9	NA	NA	9	911.926	0.284375	0	NA	NA	9	NA	NA	9	3.06153	0.0820611	0	NA	NA	9	NA	NA	9	3.84546	0.00621041	0	NA	NA	9	42.7896	0.0731763	0	NA	NA	9	0.0265466	0.0285921	0	NA	NA	9	0.0405704	0.0222152	0	0.053192	0.0288452	0	100.899
2010-01-22 16:30:00	NA	NA	9	NA	NA	9	911.684	0.3465	0	NA	NA	9	NA	NA	9	2.9375	0.0172215	0	NA	NA	9	NA	NA	9	3.83731	0.00424267	0	NA	NA	9	42.8518	0.0513802	0	NA	NA	9	0.0103647	0.0156462	0	NA	NA	9	0.0291509	0.0126152	0	0.0341503	0.0139568	0	113.047
2010-01-22 17:30:00	NA	NA	9	NA	NA	9	910.952	0.364667	0	NA	NA	9	NA	NA	9	2.99602	0.0293049	0	NA	NA	9	NA	NA	9	3.84024	0.00438088	0	NA	NA	9	42.8115	0.0562199	0	NA	NA	9	-0.0272709	0.00702526	0	NA	NA	9	0.0193055	0.012915	0	0.0342983	0.0124961	0	302.346
2010-01-22 18:30:00	NA	NA	9	NA	NA	9	910.562	0.333913	0	NA	NA	9	NA	NA	9	3.03847	0.0242082	0	NA	NA	9	NA	NA	9	3.84316	0.00404641	0	NA	NA	9	42.7921	0.0544407	0	NA	NA	9	-0.0267052	0.00573065	0	NA	NA	9	0.00338631	0.00739636	0	0.0279043	0.00578804	0	278.269
2010-01-22 19:30:00	NA	NA	9	NA	NA	9	910.469	0.32043	0	NA	NA	9	NA	NA	9	3.10253	0.0160356	0	NA	NA	9	NA	NA	9	3.84671	0.00410538	0	NA	NA	9	42.752	0.0503121	0	NA	NA	9	-0.0213276	0.00801404	0	NA	NA	9	0.0191041	0.0052529	0	0.029421	0.00678467	0	312.78
2010-01-22 20:30:00	NA	NA	9	NA	NA	9	910.942	0.376201	0	NA	NA	9	NA	NA	9	2.97231	0.0618284	0	NA	NA	9	NA	NA	9	3.83756	0.00608937	0	NA	NA	9	42.8093	0.0496362	0	NA	NA	9	0.059599	0.0281227	0	NA	NA	9	-0.0113786	0.0175944	0	0.0632128	0.0280345	0	105.255
2010-01-22 21:30:00	NA	NA	9	NA	NA	9	911.358	0.378272	0	NA	NA	9	NA	NA	9	2.9002	0.0682926	0	NA	NA	9	NA	NA	9	3.8319	0.00630957	0	NA	NA	9	42.8335	0.0511117	0	NA	NA	9	-0.0638859	0.0429822	0	NA	NA	9	0.0734775	0.0457872	0	0.101229	0.0563606	0	296.215
2010-01-22 22:30:00	NA	NA	9	NA	NA	9	911.906	0.348672	0	NA	NA	9	NA	NA	9	2.76263	0.0303149	0	NA	NA	9	NA	NA	9	3.82074	0.00371529	0	NA	NA	9	42.8753	0.0437809	0	NA	NA	9	-0.113573	0.0360523	0	NA	NA	9	0.093325	0.0375007	0	0.149435	0.0445319	0	308.726
2010-01-22 23:30:00	NA	NA	9	NA	NA	9	912.23	0.324993	0	NA	NA	9	NA	NA	9	2.72829	0.0174955	0	NA	NA	9	NA	NA	9	3.81883	0.0032068	0	NA	NA	9	42.8967	0.0426162	0	NA	NA	9	-0.104871	0.0278547	0	NA	NA	9	0.060506	0.0321646	0	0.124002	0.0330545	0	298.711
2010-01-23 00:30:00	NA	NA	9	NA	NA	9	912.294	0.315459	0	NA	NA	9	NA	NA	9	2.76429	0.0143894	0	NA	NA	9	NA	NA	9	3.82164	0.00318428	0	NA	NA	9	42.8842	0.040407	0	NA	NA	9	-0.106261	0.0298632	0	NA	NA	9	0.0570168	0.0304778	0	0.12306	0.0349107	0	297.269
2010-01-23 01:30:00	NA	NA	9	NA	NA	9	912.339	0.307981	0	NA	NA	9	NA	NA	9	2.74677	0.0229045	0	NA	NA	9	NA	NA	9	3.82048	0.00348975	0	NA	NA	9	42.8929	0.0411014	0	NA	NA	9	-0.110343	0.0365574	0	NA	NA	9	0.050322	0.0321363	0	0.124696	0.0390838	0	294.074
2010-01-23 02:30:00	NA	NA	9	NA	NA	9	912.099	0.334956	0	NA	NA	9	NA	NA	9	2.80706	0.018371	0	NA	NA	9	NA	NA	9	3.82567	0.00309534	0	NA	NA	9	42.8783	0.0389546	0	NA	NA	9	-0.143671	0.059178	0	NA	NA	9	0.0422302	0.0413158	0	0.154522	0.0612852	0	282.823
2010-01-23 03:30:00	NA	NA	9	NA	NA	9	911.851	0.324058	0	NA	NA	9	NA	NA	9	2.76318	0.0402235	0	NA	NA	9	NA	NA	9	3.82187	0.00446605	0	NA	NA	9	42.8889	0.0377417	0	NA	NA	9	-0.146551	0.0395107	0	NA	NA	9	0.105046	0.0468105	0	0.184744	0.046184	0	304.795
2010-01-23 04:30:00	NA	NA	9	NA	NA	9	911.674	0.322808	0	NA	NA	9	NA	NA	9	2.72446	0.0335195	0	NA	NA	9	NA	NA	9	3.81897	0.00404761	0	NA	NA	9	42.9039	0.0450006	0	NA	NA	9	-0.152579	0.0389708	0	NA	NA	9	0.118376	0.0442654	0	0.195948	0.0487344	0	306.935
2010-01-23 05:30:00	NA	NA	9	NA	NA	9	911.52	0.31862	0	NA	NA	9	NA	NA	9	2.72445	0.027256	0	NA	NA	9	NA	NA	9	3.81883	0.00367313	0	NA	NA	9	42.9023	0.0407921	0	NA	NA	9	-0.123572	0.0329564	0	NA	NA	9	0.0748937	0.0375498	0	0.147367	0.0407153	0	299.641
2010-01-23 06:30:00	NA	NA	9	NA	NA	9	911.343	0.336313	0	NA	NA	9	NA	NA	9	2.753	0.0236356	0	NA	NA	9	NA	NA	9	3.82158	0.00347303	0	NA	NA	9	42.8991	0.0404222	0	NA	NA	9	-0.0496482	0.0467175	0	NA	NA	9	0.0179853	0.0307811	0	0.0591584	0.0491763	0	261.219
2010-01-23 07:30:00	NA	NA	9	NA	NA	9	911.334	0.312301	0	NA	NA	9	NA	NA	9	2.82003	0.054691	0	NA	NA	9	NA	NA	9	3.82826	0.00566141	0	NA	NA	9	42.8941	0.0454849	0	NA	NA	9	-0.0438116	0.0278769	0	NA	NA	9	0.0178397	0.0170354	0	0.049521	0.0291991	0	288.273
2010-01-23 08:30:00	NA	NA	9	NA	NA	9	911.393	0.316007	0	NA	NA	9	NA	NA	9	2.91871	0.0306027	0	NA	NA	9	NA	NA	9	3.83539	0.00414789	0	NA	NA	9	42.8527	0.0478963	0	NA	NA	9	-0.0298614	0.0260157	0	NA	NA	9	0.011976	0.0165546	0	0.0365163	0.0255421	0	271.161
2010-01-23 09:30:00	NA	NA	9	NA	NA	9	911.63	0.343228	0	NA	NA	9	NA	NA	9	2.96607	0.0123538	0	NA	NA	9	NA	NA	9	3.83936	0.00337021	0	NA	NA	9	42.8396	0.0441106	0	NA	NA	9	-0.0248889	0.0173509	0	NA	NA	9	0.0163035	0.0141293	0	0.0337174	0.0157782	0	283.14
2010-01-23 10:30:00	NA	NA	9	NA	NA	9	912.038	0.322324	0	NA	NA	9	NA	NA	9	2.96397	0.0124596	0	NA	NA	9	NA	NA	9	3.84036	0.00402508	0	NA	NA	9	42.8546	0.0503622	0	NA	NA	9	-0.00464963	0.0152433	0	NA	NA	9	0.0221381	0.0155521	0	0.0280863	0.0140339	0	226.79
2010-01-23 11:30:00	NA	NA	9	NA	NA	9	912.272	0.301398	0	NA	NA	9	NA	NA	9	3.02895	0.036705	0	NA	NA	9	NA	NA	9	3.84412	0.00423834	0	NA	NA	9	42.8156	0.0542068	0	NA	NA	9	-0.0311573	0.0186266	0	NA	NA	9	0.0263257	0.0191248	0	0.0448644	0.0190662	0	302.865
2010-01-23 12:30:00	NA	NA	9	NA	NA	9	912.575	0.333204	0	NA	NA	9	NA	NA	9	2.98511	0.0394189	0	NA	NA	9	NA	NA	9	3.83795	0.0041977	0	NA	NA	9	42.7962	0.0527827	0	NA	NA	9	-0.0304602	0.0572041	0	NA	NA	9	0.0175396	0.029142	0	0.0633837	0.0365785	0	230.28
2010-01-23 13:30:00	NA	NA	9	NA	NA	9	912.706	0.337396	0	NA	NA	9	NA	NA	9	2.91459	0.0187712	0	NA	NA	9	NA	NA	9	3.83664	0.00417261	0	NA	NA	9	42.873	0.0554319	0	NA	NA	9	-0.00990864	0.018596	0	NA	NA	9	0.0141365	0.00843652	0	0.0255049	0.00801974	0	259.03
2010-01-23 14:30:00	NA	NA	9	NA	NA	9	912.455	0.295549	0	NA	NA	9	NA	NA	9	2.94138	0.027536	0	NA	NA	9	NA	NA	9	3.83694	0.00354668	0	NA	NA	9	42.8415	0.0489723	0	NA	NA	9	-0.0361775	0.0150905	0	NA	NA	9	0.0147267	0.0099319	0	0.0398515	0.0162443	0	291.678
2010-01-23 15:30:00	NA	NA	9	NA	NA	9	912.188	0.320054	0	NA	NA	9	NA	NA	9	2.98062	0.0142109	0	NA	NA	9	NA	NA	9	3.83886	0.0034065	0	NA	NA	9	42.8137	0.048715	0	NA	NA	9	-0.0370094	0.0253206	0	NA	NA	9	0.0150199	0.0155437	0	0.0421382	0.0265011	0	283.228
2010-01-23 16:30:00	NA	NA	9	NA	NA	9	911.679	0.31327	0	NA	NA	9	NA	NA	9	2.98782	0.0145398	0	NA	NA	9	NA	NA	9	3.83949	0.00413038	0	NA	NA	9	42.8125	0.0490647	0	NA	NA	9	-0.0287211	0.0130477	0	NA	NA	9	0.0210308	0.0152962	0	0.0379796	0.0151281	0	301.767
2010-01-23 17:30:00	NA	NA	9	NA	NA	9	911.4	0.323307	0	NA	NA	9	NA	NA	9	2.96255	0.0181023	0	NA	NA	9	NA	NA	9	3.83963	0.00436439	0	NA	NA	9	42.8478	0.0623478	0	NA	NA	9	0.00821952	0.0272364	0	NA	NA	9	0.0230413	0.020611	0	0.0385268	0.016742	0	164.376
2010-01-23 18:30:00	NA	NA	9	NA	NA	9	911.054	0.28282	0	NA	NA	9	NA	NA	9	2.94156	0.0174252	0	NA	NA	9	NA	NA	9	3.84062	0.0039847	0	NA	NA	9	42.8882	0.0521907	0	NA	NA	9	0.0168915	0.00966221	0	NA	NA	9	0.0119669	0.00659264	0	0.0228563	0.00654864	0	58.8021
2010-01-23 19:30:00	NA	NA	9	NA	NA	9	910.799	0.288341	0	NA	NA	9	NA	NA	9	2.93357	0.0125001	0	NA	NA	9	NA	NA	9	3.84019	0.00462539	0	NA	NA	9	42.8936	0.0594163	0	NA	NA	9	-0.0014123	0.00799818	0	NA	NA	9	0.0127284	0.00363442	0	0.0150923	0.00365685	0	170.558
2010-01-23 20:30:00	NA	NA	9	NA	NA	9	910.597	0.334004	0	NA	NA	9	NA	NA	9	2.94415	0.0109448	0	NA	NA	9	NA	NA	9	3.83732	0.00392123	0	NA	NA	9	42.8438	0.0513778	0	NA	NA	9	-0.0191301	0.00332177	0	NA	NA	9	0.00987575	0.00286759	0	0.0216606	0.00368325	0	297.283
2010-01-23 21:30:00	NA	NA	9	NA	NA	9	910.775	0.346554	0	NA	NA	9	NA	NA	9	2.93954	0.0125517	0	NA	NA	9	NA	NA	9	3.83759	0.00450735	0	NA	NA	9	42.8531	0.0571632	0	NA	NA	9	-0.0162841	0.00531348	0	NA	NA	9	0.0219823	0.0103683	0	0.028402	0.00879876	0	320.061
2010-01-23 22:30:00	NA	NA	9	NA	NA	9	910.972	0.330221	0	NA	NA	9	NA	NA	9	2.94599	0.0101144	0	NA	NA	9	NA	NA	9	3.8394	0.00425387	0	NA	NA	9	42.8671	0.0536239	0	NA	NA	9	-0.00218923	0.00918843	0	NA	NA	9	-0.000996187	0.00857123	0	0.0114488	0.00570391	0	208.802
2010-01-23 23:30:00	NA	NA	9	NA	NA	9	911.246	0.290018	0	NA	NA	9	NA	NA	9	2.96428	0.0269114	0	NA	NA	9	NA	NA	9	3.83829	0.00388624	0	NA	NA	9	42.8289	0.048665	0	NA	NA	9	-0.0247072	0.0175426	0	NA	NA	9	0.00580884	0.0142023	0	0.0294689	0.0168848	0	273.057
2010-01-24 00:30:00	NA	NA	9	NA	NA	9	911.417	0.328505	0	NA	NA	9	NA	NA	9	3.00838	0.0106225	0	NA	NA	9	NA	NA	9	3.84014	0.00364311	0	NA	NA	9	42.7935	0.0452457	0	NA	NA	9	-0.0310555	0.0225338	0	NA	NA	9	0.00780556	0.0166418	0	0.0350171	0.0241616	0	282.258
2010-01-24 01:30:00	NA	NA	9	NA	NA	9	911.566	0.278911	0	NA	NA	9	NA	NA	9	3.02963	0.0184058	0	NA	NA	9	NA	NA	9	3.8419	0.00414152	0	NA	NA	9	42.7875	0.0506715	0	NA	NA	9	-0.03403	0.0115679	0	NA	NA	9	0.0293832	0.0183875	0	0.0472111	0.0162581	0	307.215
2010-01-24 02:30:00	NA	NA	9	NA	NA	9	911.581	0.321437	0	NA	NA	9	NA	NA	9	3.06093	0.0229608	0	NA	NA	9	NA	NA	9	3.84563	0.00420272	0	NA	NA	9	42.7927	0.0524107	0	NA	NA	9	-0.00581099	0.0277217	0	NA	NA	9	0.0305101	0.0210265	0	0.0420588	0.0201457	0	209.104
2010-01-24 03:30:00	NA	NA	9	NA	NA	9	911.674	0.315531	0	NA	NA	9	NA	NA	9	2.98238	0.02687	0	NA	NA	9	NA	NA	9	3.83975	0.00410198	0	NA	NA	9	42.8229	0.0497659	0	NA	NA	9	0.0697915	0.014923	0	NA	NA	9	-0.00455016	0.0108102	0	0.070755	0.0149924	0	93.1996
2010-01-24 04:30:00	NA	NA	9	NA	NA	9	911.498	0.325251	0	NA	NA	9	NA	NA	9	2.97113	0.0106543	0	NA	NA	9	NA	NA	9	3.84178	0.00428798	0	NA	NA	9	42.8633	0.0557877	0	NA	NA	9	0.00197032	0.0241447	0	NA	NA	9	0.0222864	0.00799824	0	0.031718	0.0118823	0	164.291
2010-01-24 05:30:00	NA	NA	9	NA	NA	9	911.287	0.348509	0	NA	NA	9	NA	NA	9	2.94109	0.0555479	0	NA	NA	9	NA	NA	9	3.83717	0.00634721	0	NA	NA	9	42.8455	0.0502954	0	NA	NA	9	0.0286347	0.0447352	0	NA	NA	9	-0.00342627	0.0107627	0	0.0416772	0.0348033	0	185.766
2010-01-24 06:30:00	NA	NA	9	NA	NA	9	911.425	0.313017	0	NA	NA	9	NA	NA	9	2.84938	0.0161534	0	NA	NA	9	NA	NA	9	3.8325	0.00406117	0	NA	NA	9	42.9084	0.056005	0	NA	NA	9	0.0230258	0.0372323	0	NA	NA	9	0.00891705	0.0126528	0	0.0378673	0.0268636	0	165.408
2010-01-24 07:30:00	NA	NA	9	NA	NA	9	911.364	0.298942	0	NA	NA	9	NA	NA	9	2.86075	0.0112993	0	NA	NA	9	NA	NA	9	3.82937	0.00414798	0	NA	NA	9	42.854	0.0531464	0	NA	NA	9	-0.0263808	0.00855258	0	NA	NA	9	0.0185114	0.00932834	0	0.0326821	0.0114301	0	303.279
2010-01-24 08:30:00	NA	NA	9	NA	NA	9	911.35	0.290769	0	NA	NA	9	NA	NA	9	2.88634	0.0186234	0	NA	NA	9	NA	NA	9	3.83445	0.00478024	0	NA	NA	9	42.8838	0.0583961	0	NA	NA	9	-0.00846683	0.0148495	0	NA	NA	9	0.0100846	0.0200508	0	0.0258467	0.011296	0	283.579
2010-01-24 09:30:00	NA	NA	9	NA	NA	9	911.785	0.316096	0	NA	NA	9	NA	NA	9	2.86438	0.0114026	0	NA	NA	9	NA	NA	9	3.83151	0.00452894	0	NA	NA	9	42.8758	0.0548681	0	NA	NA	9	0.0163841	0.0168862	0	NA	NA	9	-0.0106809	0.020155	0	0.0285487	0.0160817	0	167.457
2010-01-24 10:30:00	NA	NA	9	NA	NA	9	912.037	0.323549	0	NA	NA	9	NA	NA	9	2.87316	0.0130316	0	NA	NA	9	NA	NA	9	3.83172	0.00422671	0	NA	NA	9	42.8666	0.0524595	0	NA	NA	9	-0.0327532	0.0123922	0	NA	NA	9	0.0231315	0.0074668	0	0.0411836	0.011001	0	305.361
2010-01-24 11:30:00	NA	NA	9	NA	NA	9	912.322	0.307627	0	NA	NA	9	NA	NA	9	2.90585	0.0182396	0	NA	NA	9	NA	NA	9	3.83361	0.00322071	0	NA	NA	9	42.8468	0.0450835	0	NA	NA	9	-0.094097	0.0574268	0	NA	NA	9	0.0308334	0.0292666	0	0.101115	0.061114	0	288.081
2010-01-24 12:30:00	NA	NA	9	NA	NA	9	912.738	0.316354	0	NA	NA	9	NA	NA	9	2.85618	0.0177829	0	NA	NA	9	NA	NA	9	3.82899	0.00317527	0	NA	NA	9	42.8544	0.041706	0	NA	NA	9	-0.117962	0.0297066	0	NA	NA	9	0.0716346	0.033415	0	0.140432	0.0363864	0	300.29
2010-01-24 13:30:00	NA	NA	9	NA	NA	9	912.768	0.28635	0	NA	NA	9	NA	NA	9	2.94562	0.0320116	0	NA	NA	9	NA	NA	9	3.83719	0.00369123	0	NA	NA	9	42.8388	0.0404512	0	NA	NA	9	-0.109953	0.0343592	0	NA	NA	9	0.0454691	0.0302394	0	0.122064	0.0367722	0	291.118
2010-01-24 14:30:00	NA	NA	9	NA	NA	9	912.626	0.302521	0	NA	NA	9	NA	NA	9	3.02318	0.0301011	0	NA	NA	9	NA	NA	9	3.8432	0.0038949	0	NA	NA	9	42.8116	0.0425328	0	NA	NA	9	-0.116859	0.0332385	0	NA	NA	9	0.0790122	0.035637	0	0.144201	0.0384592	0	303.441
2010-01-24 15:30:00	NA	NA	9	NA	NA	9	912.319	0.306637	0	NA	NA	9	NA	NA	9	3.10202	0.0129767	0	NA	NA	9	NA	NA	9	3.84866	0.0031231	0	NA	NA	9	42.7759	0.0407527	0	NA	NA	9	-0.0828904	0.0332728	0	NA	NA	9	0.0511053	0.0335746	0	0.0997845	0.0419489	0	298.94
2010-01-24 16:30:00	NA	NA	9	NA	NA	9	911.839	0.387279	0	NA	NA	9	NA	NA	9	3.14351	0.0305117	0	NA	NA	9	NA	NA	9	3.8522	0.00396958	0	NA	NA	9	42.7657	0.0520051	0	NA	NA	9	-0.0290322	0.0180938	0	NA	NA	9	0.0183114	0.0119509	0	0.0365693	0.0176347	0	289.169
2010-01-24 17:30:00	NA	NA	9	NA	NA	9	911.372	0.333537	0	NA	NA	9	NA	NA	9	3.14177	0.039088	0	NA	NA	9	NA	NA	9	3.85267	0.00496347	0	NA	NA	9	42.7741	0.0602028	0	NA	NA	9	-0.00923649	0.0187393	0	NA	NA	9	0.0131989	0.0227905	0	0.0278152	0.0188712	0	207.148
2010-01-24 18:30:00	NA	NA	9	NA	NA	9	911.15	0.343915	0	NA	NA	9	NA	NA	9	3.03622	0.0367428	0	NA	NA	9	NA	NA	9	3.84544	0.00585727	0	NA	NA	9	42.8232	0.0513997	0	NA	NA	9	-0.0287129	0.0342929	0	NA	NA	9	0.0472486	0.0307435	0	0.0629402	0.034872	0	264.128
2010-01-24 19:30:00	NA	NA	9	NA	NA	9	910.866	0.328927	0	NA	NA	9	NA	NA	9	3.01443	0.0252063	0	NA	NA	9	NA	NA	9	3.84492	0.00404753	0	NA	NA	9	42.8457	0.0518686	0	NA	NA	9	0.0475284	0.0182228	0	NA	NA	9	0.0311209	0.0107008	0	0.0583882	0.0162712	0	55.313
2010-01-24 20:30:00	NA	NA	9	NA	NA	9	910.577	0.323871	0	NA	NA	9	NA	NA	9	2.99722	0.0123492	0	NA	NA	9	NA	NA	9	3.84263	0.00434918	0	NA	NA	9	42.8401	0.0554583	0	NA	NA	9	-0.012815	0.0118597	0	NA	NA	9	0.0256816	0.00888685	0	0.0310338	0.00895653	0	281.113
2010-01-24 21:30:00	NA	NA	9	NA	NA	9	910.446	0.313229	0	NA	NA	9	NA	NA	9	3.01782	0.0162512	0	NA	NA	9	NA	NA	9	3.84471	0.00455371	0	NA	NA	9	42.8389	0.0588306	0	NA	NA	9	-0.0135952	0.0106729	0	NA	NA	9	0.0164164	0.018613	0	0.027349	0.0129055	0	262.554
2010-01-24 22:30:00	NA	NA	9	NA	NA	9	910.39	0.285916	0	NA	NA	9	NA	NA	9	3.02072	0.0092359	0	NA	NA	9	NA	NA	9	3.84434	0.00453317	0	NA	NA	9	42.8304	0.057258	0	NA	NA	9	-0.0242513	0.00280172	0	NA	NA	9	0.00210427	0.00563197	0	0.0249917	0.00274257	0	275.238
2010-01-24 23:30:00	NA	NA	9	NA	NA	9	910.617	0.343223	0	NA	NA	9	NA	NA	9	3.01703	0.014383	0	NA	NA	9	NA	NA	9	3.8428	0.00412091	0	NA	NA	9	42.8159	0.0519267	0	NA	NA	9	-0.0233501	0.00582074	0	NA	NA	9	0.00316824	0.00492582	0	0.0241806	0.00535625	0	279.745
2010-01-25 00:30:00	NA	NA	9	NA	NA	9	910.941	0.282587	0	NA	NA	9	NA	NA	9	3.02777	0.0165603	0	NA	NA	9	NA	NA	9	3.84439	0.00415561	0	NA	NA	9	42.8215	0.0531359	0	NA	NA	9	-0.021945	0.00468275	0	NA	NA	9	0.0186441	0.0103729	0	0.0299324	0.00791952	0	307.288
2010-01-25 01:30:00	NA	NA	9	NA	NA	9	911.085	0.322569	0	NA	NA	9	NA	NA	9	3.03074	0.0114973	0	NA	NA	9	NA	NA	9	3.84598	0.00444089	0	NA	NA	9	42.8373	0.0561358	0	NA	NA	9	-0.0129685	0.00590538	0	NA	NA	9	0.00515468	0.00377531	0	0.0142655	0.00635371	0	286.381
2010-01-25 02:30:00	NA	NA	9	NA	NA	9	911.525	0.344947	0	NA	NA	9	NA	NA	9	2.99979	0.0644945	0	NA	NA	9	NA	NA	9	3.84221	0.00739975	0	NA	NA	9	42.8308	0.0507035	0	NA	NA	9	0.0185919	0.0156798	0	NA	NA	9	0.0217143	0.0287402	0	0.032514	0.0288397	0	72.6638
2010-01-25 03:30:00	NA	NA	9	NA	NA	9	911.747	0.344872	0	NA	NA	9	NA	NA	9	2.9314	0.0456664	0	NA	NA	9	NA	NA	9	3.83723	0.00577539	0	NA	NA	9	42.8587	0.0510023	0	NA	NA	9	-0.0366475	0.0278848	0	NA	NA	9	0.0408783	0.0380482	0	0.0607356	0.0393714	0	295.306
2010-01-25 04:30:00	NA	NA	9	NA	NA	9	911.489	0.342689	0	NA	NA	9	NA	NA	9	3.11929	0.0827161	0	NA	NA	9	NA	NA	9	3.85071	0.00699107	0	NA	NA	9	42.7793	0.056943	0	NA	NA	9	-0.0548001	0.0251165	0	NA	NA	9	0.0638419	0.0259757	0	0.086722	0.0293848	0	315.782
2010-01-25 05:30:00	NA	NA	9	NA	NA	9	911.399	0.316744	0	NA	NA	9	NA	NA	9	3.10011	0.0390178	0	NA	NA	9	NA	NA	9	3.84844	0.00416357	0	NA	NA	9	42.7762	0.0528628	0	NA	NA	9	0.0365906	0.0424213	0	NA	NA	9	-0.0298733	0.0329443	0	0.0561503	0.0443036	0	148.965
2010-01-25 06:30:00	NA	NA	9	NA	NA	9	911.594	0.291306	0	NA	NA	9	NA	NA	9	2.96345	0.0550581	0	NA	NA	9	NA	NA	9	3.84082	0.00503473	0	NA	NA	9	42.8614	0.0518845	0	NA	NA	9	0.067976	0.0379837	0	NA	NA	9	0.00848484	0.0244302	0	0.072906	0.0376391	0	82.4617
2010-01-25 07:30:00	NA	NA	9	NA	NA	9	911.605	0.303103	0	NA	NA	9	NA	NA	9	2.86442	0.0182562	0	NA	NA	9	NA	NA	9	3.83546	0.00468226	0	NA	NA	9	42.9255	0.0600726	0	NA	NA	9	0.00528984	0.0104028	0	NA	NA	9	0.00892403	0.0171013	0	0.0164501	0.0154141	0	146.424
2010-01-25 08:30:00	NA	NA	9	NA	NA	9	911.575	0.308891	0	NA	NA	9	NA	NA	9	2.83844	0.0147673	0	NA	NA	9	NA	NA	9	3.83195	0.00413404	0	NA	NA	9	42.916	0.0541618	0	NA	NA	9	0.00709916	0.01093	0	NA	NA	9	-0.00937303	0.00973901	0	0.016639	0.0086966	0	156.501
2010-01-25 09:30:00	NA	NA	9	NA	NA	9	911.715	0.308388	0	NA	NA	9	NA	NA	9	2.83999	0.0117458	0	NA	NA	9	NA	NA	9	3.83287	0.00416103	0	NA	NA	9	42.9253	0.0549701	0	NA	NA	9	-0.0107454	0.0139975	0	NA	NA	9	-0.00457439	0.00954685	0	0.0166042	0.0121524	0	219.544
2010-01-25 10:30:00	NA	NA	9	NA	NA	9	911.892	0.373782	0	NA	NA	9	NA	NA	9	2.82434	0.00970986	0	NA	NA	9	NA	NA	9	3.83259	0.00444199	0	NA	NA	9	42.9425	0.0555504	0	NA	NA	9	0.00179851	0.011488	0	NA	NA	9	0.00596367	0.00622421	0	0.0127069	0.00692687	0	178.883
2010-01-25 11:30:00	NA	NA	9	NA	NA	9	912.148	0.308284	0	NA	NA	9	NA	NA	9	2.84491	0.0238345	0	NA	NA	9	NA	NA	9	3.83158	0.00428231	0	NA	NA	9	42.9023	0.0522283	0	NA	NA	9	-0.0431782	0.0229139	0	NA	NA	9	0.0271741	0.0267197	0	0.0524139	0.0330829	0	298.733
2010-01-25 12:30:00	NA	NA	9	NA	NA	9	912.505	0.353544	0	NA	NA	9	NA	NA	9	2.85342	0.0305201	0	NA	NA	9	NA	NA	9	3.82949	0.00348839	0	NA	NA	9	42.8645	0.0409996	0	NA	NA	9	-0.110616	0.0325095	0	NA	NA	9	0.109531	0.0431873	0	0.158532	0.0449673	0	313.678
2010-01-25 13:30:00	NA	NA	9	NA	NA	9	912.891	0.303609	0	NA	NA	9	NA	NA	9	2.8239	0.0190486	0	NA	NA	9	NA	NA	9	3.8284	0.00358378	0	NA	NA	9	42.8897	0.0401855	0	NA	NA	9	-0.169448	0.0449815	0	NA	NA	9	0.104272	0.0473462	0	0.202621	0.0528624	0	300.787
2010-01-25 14:30:00	NA	NA	9	NA	NA	9	913.074	0.297833	0	NA	NA	9	NA	NA	9	2.81703	0.0296805	0	NA	NA	9	NA	NA	9	3.82833	0.00370309	0	NA	NA	9	42.8979	0.0402349	0	NA	NA	9	-0.192202	0.0519206	0	NA	NA	9	0.12712	0.0545563	0	0.23425	0.0624443	0	302.608
2010-01-25 15:30:00	NA	NA	9	NA	NA	9	913.179	0.321879	0	NA	NA	9	NA	NA	9	2.75264	0.0155279	0	NA	NA	9	NA	NA	9	3.82321	0.00315477	0	NA	NA	9	42.9189	0.0439365	0	NA	NA	9	-0.207389	0.0887906	0	NA	NA	9	0.080967	0.0581647	0	0.230945	0.0865751	0	281.499
2010-01-25 16:30:00	NA	NA	9	NA	NA	9	912.151	0.442188	0	NA	NA	9	NA	NA	9	2.81446	0.0403671	0	NA	NA	9	NA	NA	9	3.82488	0.00391452	0	NA	NA	9	42.8584	0.049906	0	NA	NA	9	-0.106437	0.0547258	0	NA	NA	9	0.0514322	0.038277	0	0.120572	0.062419	0	292.564
2010-01-25 17:30:00	NA	NA	9	NA	NA	9	911.576	0.369012	0	NA	NA	9	NA	NA	9	2.91109	0.0610072	0	NA	NA	9	NA	NA	9	3.83393	0.00644684	0	NA	NA	9	42.8444	0.0416848	0	NA	NA	9	-0.0865618	0.0387143	0	NA	NA	9	0.0404254	0.0253057	0	0.0965843	0.0440192	0	292.561
2010-01-25 18:30:00	NA	NA	9	NA	NA	9	910.782	0.343481	0	NA	NA	9	NA	NA	9	3.04363	0.0345095	0	NA	NA	9	NA	NA	9	3.84587	0.00438919	0	NA	NA	9	42.819	0.0461223	0	NA	NA	9	-0.0644475	0.0261069	0	NA	NA	9	0.0209641	0.0191077	0	0.0694092	0.0286686	0	285.29
2010-01-25 19:30:00	NA	NA	9	NA	NA	9	910.225	0.326494	0	NA	NA	9	NA	NA	9	3.04146	0.019686	0	NA	NA	9	NA	NA	9	3.8477	0.00397901	0	NA	NA	9	42.8452	0.0473919	0	NA	NA	9	-0.0624975	0.0321741	0	NA	NA	9	-0.0259074	0.0244467	0	0.0704439	0.0353183	0	247.853
2010-01-25 20:30:00	NA	NA	9	NA	NA	9	909.767	0.381227	0	NA	NA	9	NA	NA	9	3.06661	0.0240821	0	NA	NA	9	NA	NA	9	3.85131	0.00525886	0	NA	NA	9	42.8572	0.0560574	0	NA	NA	9	-0.0367145	0.0279764	0	NA	NA	9	-0.0346953	0.0234406	0	0.051671	0.0348411	0	223.201
2010-01-25 21:30:00	NA	NA	9	NA	NA	9	909.212	0.30054	0	NA	NA	9	NA	NA	9	3.12594	0.0165104	0	NA	NA	9	NA	NA	9	3.85717	0.00450449	0	NA	NA	9	42.8525	0.0593125	0	NA	NA	9	-0.0069931	0.00639642	0	NA	NA	9	-0.0199489	0.00568776	0	0.0221287	0.00551558	0	197.7
2010-01-25 22:30:00	NA	NA	9	NA	NA	9	909.168	0.338911	0	NA	NA	9	NA	NA	9	3.11371	0.0176713	0	NA	NA	9	NA	NA	9	3.85432	0.00411145	0	NA	NA	9	42.833	0.051089	0	NA	NA	9	0.0207975	0.0284177	0	NA	NA	9	-0.0462827	0.0230458	0	0.0563388	0.0271829	0	170.193
2010-01-25 23:30:00	NA	NA	9	NA	NA	9	909.349	0.344123	0	NA	NA	9	NA	NA	9	3.08551	0.0169905	0	NA	NA	9	NA	NA	9	3.85139	0.00405868	0	NA	NA	9	42.8336	0.0484518	0	NA	NA	9	0.0318413	0.0217341	0	NA	NA	9	-0.0451634	0.010876	0	0.058691	0.0141208	0	147.973
2010-01-26 00:30:00	NA	NA	9	NA	NA	9	909.617	0.319926	0	NA	NA	9	NA	NA	9	3.05967	0.0262349	0	NA	NA	9	NA	NA	9	3.84906	0.00395539	0	NA	NA	9	42.8385	0.0499559	0	NA	NA	9	0.0760371	0.0275035	0	NA	NA	9	-0.0292865	0.0262075	0	0.0841159	0.0317315	0	108.007
2010-01-26 01:30:00	NA	NA	9	NA	NA	9	909.994	0.33082	0	NA	NA	9	NA	NA	9	3.0104	0.0330824	0	NA	NA	9	NA	NA	9	3.84615	0.00546619	0	NA	NA	9	42.8669	0.047846	0	NA	NA	9	0.0200195	0.0454184	0	NA	NA	9	-0.00278666	0.00861315	0	0.0260534	0.0432046	0	140.912
2010-01-26 02:30:00	NA	NA	9	NA	NA	9	910.673	0.329001	0	NA	NA	9	NA	NA	9	2.89071	0.0290119	0	NA	NA	9	NA	NA	9	3.83391	0.00401275	0	NA	NA	9	42.8717	0.03982	0	NA	NA	9	0.129375	0.0558924	0	NA	NA	9	-0.039881	0.0190379	0	0.136094	0.0573854	0	107.442
2010-01-26 03:30:00	NA	NA	9	NA	NA	9	910.889	0.325694	0	NA	NA	9	NA	NA	9	2.89107	0.0218178	0	NA	NA	9	NA	NA	9	3.83461	0.00424469	0	NA	NA	9	42.8798	0.0500566	0	NA	NA	9	-0.0115295	0.0165082	0	NA	NA	9	-0.0127959	0.0055554	0	0.0228085	0.00892712	0	216.47
2010-01-26 04:30:00	NA	NA	9	NA	NA	9	911.015	0.314498	0	NA	NA	9	NA	NA	9	2.90047	0.0160755	0	NA	NA	9	NA	NA	9	3.83558	0.00382059	0	NA	NA	9	42.8795	0.0477386	0	NA	NA	9	-0.0160788	0.00583809	0	NA	NA	9	-0.01463	0.0051431	0	0.0220285	0.00691634	0	227.415
2010-01-26 05:30:00	NA	NA	9	NA	NA	9	911.052	0.267692	0	NA	NA	9	NA	NA	9	2.92004	0.0184442	0	NA	NA	9	NA	NA	9	3.83728	0.00471614	0	NA	NA	9	42.8748	0.0534683	0	NA	NA	9	-0.027995	0.0114889	0	NA	NA	9	-0.014511	0.00402121	0	0.0321449	0.0104467	0	239.754
2010-01-26 06:30:00	NA	NA	9	NA	NA	9	911.053	0.305506	0	NA	NA	9	NA	NA	9	2.91646	0.0153808	0	NA	NA	9	NA	NA	9	3.83653	0.00376484	0	NA	NA	9	42.8702	0.0432177	0	NA	NA	9	-0.0215148	0.0100991	0	NA	NA	9	-0.00418343	0.00864938	0	0.0237472	0.00965475	0	253.519
2010-01-26 07:30:00	NA	NA	9	NA	NA	9	910.958	0.298474	0	NA	NA	9	NA	NA	9	2.88627	0.020455	0	NA	NA	9	NA	NA	9	3.83486	0.00388213	0	NA	NA	9	42.8893	0.0518626	0	NA	NA	9	0.0197527	0.0232076	0	NA	NA	9	-0.0230904	0.0160377	0	0.0360569	0.0204652	0	156.601
2010-01-26 08:30:00	NA	NA	9	NA	NA	9	910.932	0.337178	0	NA	NA	9	NA	NA	9	2.85711	0.0158126	0	NA	NA	9	NA	NA	9	3.83272	0.0044639	0	NA	NA	9	42.9012	0.0558602	0	NA	NA	9	0.0386044	0.0151108	0	NA	NA	9	-0.0311896	0.0104316	0	0.0517625	0.0109898	0	130.72
2010-01-26 09:30:00	NA	NA	9	NA	NA	9	910.907	0.333576	0	NA	NA	9	NA	NA	9	2.80645	0.0238489	0	NA	NA	9	NA	NA	9	3.82709	0.00396317	0	NA	NA	9	42.8977	0.0443634	0	NA	NA	9	0.0625874	0.017834	0	NA	NA	9	-0.00351997	0.0112714	0	0.0636288	0.0180549	0	93.4722
2010-01-26 10:30:00	NA	NA	9	NA	NA	9	910.929	0.31848	0	NA	NA	9	NA	NA	9	2.79912	0.010198	0	NA	NA	9	NA	NA	9	3.8281	0.00388979	0	NA	NA	9	42.9201	0.0517177	0	NA	NA	9	-8.07723e-05	0.0226981	0	NA	NA	9	-0.0142418	0.00695983	0	0.0253601	0.0110949	0	181.03
2010-01-26 11:30:00	NA	NA	9	NA	NA	9	911.103	0.330432	0	NA	NA	9	NA	NA	9	2.81174	0.0141169	0	NA	NA	9	NA	NA	9	3.83169	0.00445525	0	NA	NA	9	42.9484	0.0559447	0	NA	NA	9	-0.00999639	0.00343568	0	NA	NA	9	-0.01385	0.0022029	0	0.017437	0.00208562	0	215.578
2010-01-26 12:30:00	NA	NA	9	NA	NA	9	911.487	0.365941	0	NA	NA	9	NA	NA	9	2.79324	0.0447957	0	NA	NA	9	NA	NA	9	3.8263	0.00653632	0	NA	NA	9	42.9049	0.0516587	0	NA	NA	9	-0.026921	0.0139403	0	NA	NA	9	-0.0225202	0.0165904	0	0.0379345	0.0161968	0	231.873
2010-01-26 13:30:00	NA	NA	9	NA	NA	9	912.034	0.358498	0	NA	NA	9	NA	NA	9	2.71028	0.0257004	0	NA	NA	9	NA	NA	9	3.81672	0.00358804	0	NA	NA	9	42.8942	0.0392182	0	NA	NA	9	-0.0398005	0.0190139	0	NA	NA	9	0.00728202	0.0135757	0	0.0420182	0.0204287	0	274.741
2010-01-26 14:30:00	NA	NA	9	NA	NA	9	912.338	0.336825	0	NA	NA	9	NA	NA	9	2.69661	0.0189666	0	NA	NA	9	NA	NA	9	3.81582	0.00340977	0	NA	NA	9	42.9008	0.0403176	0	NA	NA	9	-0.0349849	0.0147041	0	NA	NA	9	0.00726959	0.0127974	0	0.0374063	0.0160459	0	276.926
2010-01-26 15:30:00	NA	NA	9	NA	NA	9	912.506	0.303204	0	NA	NA	9	NA	NA	9	2.72969	0.0154212	0	NA	NA	9	NA	NA	9	3.82	0.00327455	0	NA	NA	9	42.9094	0.0408418	0	NA	NA	9	-0.0737345	0.0465332	0	NA	NA	9	-0.0330757	0.0288227	0	0.08317	0.0510822	0	247.894
2010-01-26 16:30:00	NA	NA	9	NA	NA	9	913.111	0.36792	0	NA	NA	9	NA	NA	9	2.72962	0.0142311	0	NA	NA	9	NA	NA	9	3.82113	0.00306735	0	NA	NA	9	42.9234	0.0419763	0	NA	NA	9	-0.0690257	0.0465672	0	NA	NA	9	-0.0236883	0.0244355	0	0.0807894	0.0395435	0	241.44
2010-01-26 17:30:00	NA	NA	9	NA	NA	9	913	0.659577	0	NA	NA	9	NA	NA	9	2.82791	0.0293226	0	NA	NA	9	NA	NA	9	3.82982	0.00389771	0	NA	NA	9	42.9022	0.0403479	0	NA	NA	9	-0.0912591	0.043467	0	NA	NA	9	0.0148177	0.0430429	0	0.104269	0.0376365	0	270.518
2010-01-26 18:30:00	NA	NA	9	NA	NA	9	911.228	0.344167	0	NA	NA	9	NA	NA	9	2.81692	0.0201107	0	NA	NA	9	NA	NA	9	3.82792	0.00349304	0	NA	NA	9	42.894	0.042611	0	NA	NA	9	-0.132483	0.0610904	0	NA	NA	9	0.0456513	0.0273265	0	0.144685	0.0563931	0	277.559
2010-01-26 19:30:00	NA	NA	9	NA	NA	9	910.714	0.348415	0	NA	NA	9	NA	NA	9	2.79582	0.0156565	0	NA	NA	9	NA	NA	9	3.82705	0.00287713	0	NA	NA	9	42.9115	0.0382473	0	NA	NA	9	-0.130096	0.036087	0	NA	NA	9	0.0426045	0.0357304	0	0.141634	0.0354715	0	288.036
2010-01-26 20:30:00	NA	NA	9	NA	NA	9	910.131	0.360582	0	NA	NA	9	NA	NA	9	2.78329	0.0190976	0	NA	NA	9	NA	NA	9	3.82536	0.00356077	0	NA	NA	9	42.9072	0.0435524	0	NA	NA	9	-0.152969	0.0436701	0	NA	NA	9	0.0714134	0.021892	0	0.171176	0.0398033	0	296.246
2010-01-26 21:30:00	NA	NA	9	NA	NA	9	909.622	0.34419	0	NA	NA	9	NA	NA	9	2.77253	0.035406	0	NA	NA	9	NA	NA	9	3.8253	0.00405043	0	NA	NA	9	42.9211	0.0392205	0	NA	NA	9	-0.129662	0.0451172	0	NA	NA	9	0.0712289	0.0223697	0	0.1508	0.0409948	0	300.613
2010-01-26 22:30:00	NA	NA	9	NA	NA	9	909.085	0.268525	0	NA	NA	9	NA	NA	9	2.81374	0.0131469	0	NA	NA	9	NA	NA	9	3.82794	0.00318727	0	NA	NA	9	42.8998	0.0410297	0	NA	NA	9	-0.0981529	0.0384507	0	NA	NA	9	0.0501193	0.020041	0	0.113003	0.0354406	0	298.857
2010-01-26 23:30:00	NA	NA	9	NA	NA	9	908.881	0.318469	0	NA	NA	9	NA	NA	9	2.83089	0.016101	0	NA	NA	9	NA	NA	9	3.83042	0.00325221	0	NA	NA	9	42.9083	0.0422214	0	NA	NA	9	-0.00256189	0.0264342	0	NA	NA	9	0.0402354	0.0159151	0	0.0472171	0.0186472	0	133.529
2010-01-27 00:30:00	NA	NA	9	NA	NA	9	908.929	0.342703	0	NA	NA	9	NA	NA	9	2.83767	0.0114668	0	NA	NA	9	NA	NA	9	3.83107	0.00386502	0	NA	NA	9	42.9075	0.0504596	0	NA	NA	9	0.0101531	0.0092057	0	NA	NA	9	0.0487284	0.0130161	0	0.0504491	0.0136585	0	62.9996
2010-01-27 01:30:00	NA	NA	9	NA	NA	9	909.214	0.331657	0	NA	NA	9	NA	NA	9	2.83422	0.0168391	0	NA	NA	9	NA	NA	9	3.83086	0.00372299	0	NA	NA	9	42.9092	0.0509687	0	NA	NA	9	0.0548996	0.0349236	0	NA	NA	9	0.0659879	0.0214372	0	0.0876642	0.0369108	0	35.9394
2010-01-27 02:30:00	NA	NA	9	NA	NA	9	909.838	0.3357	0	NA	NA	9	NA	NA	9	2.78053	0.0182181	0	NA	NA	9	NA	NA	9	3.8277	0.00361379	0	NA	NA	9	42.9405	0.0471843	0	NA	NA	9	0.049954	0.0174097	0	NA	NA	9	0.075384	0.0176191	0	0.0917578	0.0192886	0	33.2873
2010-01-27 03:30:00	NA	NA	9	NA	NA	9	910.321	0.342989	0	NA	NA	9	NA	NA	9	2.75604	0.0122426	0	NA	NA	9	NA	NA	9	3.82722	0.00400206	0	NA	NA	9	42.9667	0.052593	0	NA	NA	9	0.0150714	0.0184783	0	NA	NA	9	0.0132869	0.00802964	0	0.0238243	0.0155538	0	110.539
2010-01-27 04:30:00	NA	NA	9	NA	NA	9	910.597	0.296766	0	NA	NA	9	NA	NA	9	2.75913	0.0112807	0	NA	NA	9	NA	NA	9	3.82757	0.00463445	0	NA	NA	9	42.9669	0.0594911	0	NA	NA	9	-0.00552789	0.00763977	0	NA	NA	9	0.0141891	0.00306666	0	0.0170803	0.00280871	0	208.878
2010-01-27 05:30:00	NA	NA	9	NA	NA	9	910.858	0.337079	0	NA	NA	9	NA	NA	9	2.81088	0.0406636	0	NA	NA	9	NA	NA	9	3.8297	0.00441712	0	NA	NA	9	42.9246	0.0508877	0	NA	NA	9	-0.0473095	0.0410605	0	NA	NA	9	0.0016082	0.0159426	0	0.0516779	0.0388595	0	273.338
2010-01-27 06:30:00	NA	NA	9	NA	NA	9	910.975	0.310009	0	NA	NA	9	NA	NA	9	2.82194	0.0147537	0	NA	NA	9	NA	NA	9	3.82954	0.00321076	0	NA	NA	9	42.9079	0.0455301	0	NA	NA	9	-0.113895	0.0187719	0	NA	NA	9	0.0165179	0.0116683	0	0.115689	0.0186918	0	278.286
2010-01-27 07:30:00	NA	NA	9	NA	NA	9	910.738	0.325065	0	NA	NA	9	NA	NA	9	2.88579	0.0441942	0	NA	NA	9	NA	NA	9	3.83459	0.0048924	0	NA	NA	9	42.8867	0.0444147	0	NA	NA	9	-0.0764956	0.0293007	0	NA	NA	9	0.0463948	0.0140632	0	0.0915307	0.0261204	0	303.003
2010-01-27 08:30:00	NA	NA	9	NA	NA	9	910.542	0.319667	0	NA	NA	9	NA	NA	9	2.90869	0.0177329	0	NA	NA	9	NA	NA	9	3.83561	0.00319901	0	NA	NA	9	42.8693	0.0410811	0	NA	NA	9	-0.0924914	0.031503	0	NA	NA	9	0.0559826	0.0148992	0	0.109849	0.0289162	0	302.685
2010-01-27 09:30:00	NA	NA	9	NA	NA	9	910.367	0.309476	0	NA	NA	9	NA	NA	9	2.89346	0.0130229	0	NA	NA	9	NA	NA	9	3.83501	0.00294118	0	NA	NA	9	42.8821	0.0404196	0	NA	NA	9	-0.0701908	0.0286408	0	NA	NA	9	0.0337403	0.0225759	0	0.0817541	0.0266653	0	295.566
2010-01-27 10:30:00	NA	NA	9	NA	NA	9	910.18	0.277549	0	NA	NA	9	NA	NA	9	2.87215	0.0244713	0	NA	NA	9	NA	NA	9	3.83449	0.00416362	0	NA	NA	9	42.9039	0.0474194	0	NA	NA	9	0.00594414	0.017085	0	NA	NA	9	0.0417045	0.0193902	0	0.0452812	0.0197975	0	115.745
2010-01-27 11:30:00	NA	NA	9	NA	NA	9	910.273	0.308966	0	NA	NA	9	NA	NA	9	2.859	0.0184322	0	NA	NA	9	NA	NA	9	3.83408	0.00416947	0	NA	NA	9	42.9162	0.0510078	0	NA	NA	9	0.012956	0.0189519	0	NA	NA	9	0.0455387	0.0201738	0	0.0504973	0.0213923	0	88.1909
2010-01-27 12:30:00	NA	NA	9	NA	NA	9	910.49	0.31532	0	NA	NA	9	NA	NA	9	2.85355	0.0116846	0	NA	NA	9	NA	NA	9	3.83305	0.00394493	0	NA	NA	9	42.9103	0.04989	0	NA	NA	9	0.0100984	0.0186259	0	NA	NA	9	0.037617	0.0176133	0	0.0428107	0.0184724	0	124.122
2010-01-27 13:30:00	NA	NA	9	NA	NA	9	910.801	0.32006	0	NA	NA	9	NA	NA	9	2.85576	0.0104264	0	NA	NA	9	NA	NA	9	3.83351	0.00306689	0	NA	NA	9	42.913	0.0406006	0	NA	NA	9	0.00291882	0.00937039	0	NA	NA	9	0.070698	0.016202	0	0.0714119	0.0160415	0	132.703
2010-01-27 14:30:00	NA	NA	9	NA	NA	9	911.181	0.269733	0	NA	NA	9	NA	NA	9	2.86399	0.00967399	0	NA	NA	9	NA	NA	9	3.83455	0.00364394	0	NA	NA	9	42.9148	0.0471736	0	NA	NA	9	0.0258286	0.0103519	0	NA	NA	9	0.0641844	0.0210015	0	0.0696762	0.0219127	0	23.0318
2010-01-27 15:30:00	NA	NA	9	NA	NA	9	911.455	0.325248	0	NA	NA	9	NA	NA	9	2.87712	0.0111958	0	NA	NA	9	NA	NA	9	3.83562	0.00364247	0	NA	NA	9	42.9107	0.0478895	0	NA	NA	9	-0.00374054	0.011866	0	NA	NA	9	0.024392	0.016987	0	0.0290872	0.0138608	0	193.956
2010-01-27 16:30:00	NA	NA	9	NA	NA	9	911.721	0.316665	0	NA	NA	9	NA	NA	9	2.88545	0.0393191	0	NA	NA	9	NA	NA	9	3.83463	0.00430436	0	NA	NA	9	42.8871	0.0460615	0	NA	NA	9	-0.0890438	0.0569577	0	NA	NA	9	0.0478063	0.0402805	0	0.105283	0.0632129	0	295.268
2010-01-27 17:30:00	NA	NA	9	NA	NA	9	911.844	0.334715	0	NA	NA	9	NA	NA	9	2.89062	0.0344367	0	NA	NA	9	NA	NA	9	3.83543	0.00408128	0	NA	NA	9	42.8901	0.0396067	0	NA	NA	9	-0.148151	0.0658975	0	NA	NA	9	0.00487761	0.0479293	0	0.159493	0.0563216	0	271.253
2010-01-27 18:30:00	NA	NA	9	NA	NA	9	911.596	0.335217	0	NA	NA	9	NA	NA	9	2.90354	0.0124665	0	NA	NA	9	NA	NA	9	3.83579	0.00321053	0	NA	NA	9	42.8777	0.0418056	0	NA	NA	9	-0.167678	0.0314339	0	NA	NA	9	0.0211117	0.0382601	0	0.173426	0.0305941	0	277.136
2010-01-27 19:30:00	NA	NA	9	NA	NA	9	911.142	0.385161	0	NA	NA	9	NA	NA	9	2.91538	0.0120066	0	NA	NA	9	NA	NA	9	3.83736	0.00310714	0	NA	NA	9	42.8819	0.0420668	0	NA	NA	9	-0.140143	0.0434969	0	NA	NA	9	0.0697966	0.0195282	0	0.158651	0.040182	0	297.972
2010-01-27 20:30:00	NA	NA	9	NA	NA	9	910.438	0.337276	0	NA	NA	9	NA	NA	9	2.90959	0.0147819	0	NA	NA	9	NA	NA	9	3.83701	0.00335748	0	NA	NA	9	42.8857	0.0432047	0	NA	NA	9	-0.0878087	0.045479	0	NA	NA	9	0.0518785	0.0154541	0	0.104421	0.042485	0	301.094
2010-01-27 21:30:00	NA	NA	9	NA	NA	9	909.817	0.365021	0	NA	NA	9	NA	NA	9	2.88936	0.022041	0	NA	NA	9	NA	NA	9	3.83563	0.00397597	0	NA	NA	9	42.8956	0.0483859	0	NA	NA	9	0.00791419	0.0185705	0	NA	NA	9	0.0647124	0.0328498	0	0.067202	0.0340299	0	143.844
2010-01-27 22:30:00	NA	NA	9	NA	NA	9	909.139	0.35494	0	NA	NA	9	NA	NA	9	2.88696	0.0123439	0	NA	NA	9	NA	NA	9	3.83672	0.00412368	0	NA	NA	9	42.9129	0.0515855	0	NA	NA	9	-0.00148183	0.0081811	0	NA	NA	9	0.0202886	0.0328917	0	0.0326815	0.0222301	0	199.981
2010-01-27 23:30:00	NA	NA	9	NA	NA	9	908.655	0.320778	0	NA	NA	9	NA	NA	9	2.89178	0.010366	0	NA	NA	9	NA	NA	9	3.83786	0.00429033	0	NA	NA	9	42.9211	0.0560505	0	NA	NA	9	0.00684377	0.0129986	0	NA	NA	9	0.0254132	0.0317784	0	0.031034	0.0301369	0	131.259
2010-01-28 00:30:00	NA	NA	9	NA	NA	9	908.464	0.284231	0	NA	NA	9	NA	NA	9	2.92991	0.0139937	0	NA	NA	9	NA	NA	9	3.84008	0.00386212	0	NA	NA	9	42.8986	0.0498997	0	NA	NA	9	0.0376138	0.0190417	0	NA	NA	9	0.0636148	0.0205329	0	0.0771671	0.0170526	0	35.8283
2010-01-28 01:30:00	NA	NA	9	NA	NA	9	908.61	0.356225	0	NA	NA	9	NA	NA	9	2.91424	0.0173246	0	NA	NA	9	NA	NA	9	3.83841	0.00381414	0	NA	NA	9	42.8983	0.0490369	0	NA	NA	9	0.0387677	0.016984	0	NA	NA	9	0.0583185	0.0124987	0	0.0712609	0.0164451	0	32.2246
2010-01-28 02:30:00	NA	NA	9	NA	NA	9	909.055	0.364712	0	NA	NA	9	NA	NA	9	2.87369	0.0209811	0	NA	NA	9	NA	NA	9	3.83613	0.0041531	0	NA	NA	9	42.9232	0.0515319	0	NA	NA	9	0.031179	0.0152205	0	NA	NA	9	0.0703592	0.0285299	0	0.0771758	0.0318125	0	23.3376
2010-01-28 03:30:00	NA	NA	9	NA	NA	9	909.748	0.329208	0	NA	NA	9	NA	NA	9	2.80021	0.0178752	0	NA	NA	9	NA	NA	9	3.83019	0.00392243	0	NA	NA	9	42.9458	0.0556705	0	NA	NA	9	0.0166175	0.0193857	0	NA	NA	9	0.0447835	0.023096	0	0.0493211	0.0275369	0	106.116
2010-01-28 04:30:00	NA	NA	9	NA	NA	9	910.259	0.335973	0	NA	NA	9	NA	NA	9	2.83597	0.02363	0	NA	NA	9	NA	NA	9	3.83157	0.00398137	0	NA	NA	9	42.9152	0.0525732	0	NA	NA	9	-0.0637373	0.06708	0	NA	NA	9	0.0418486	0.0279156	0	0.0826423	0.0652874	0	249.404
2010-01-28 05:30:00	NA	NA	9	NA	NA	9	910.705	0.299409	0	NA	NA	9	NA	NA	9	2.85611	0.0296149	0	NA	NA	9	NA	NA	9	3.83213	0.00371002	0	NA	NA	9	42.8952	0.040773	0	NA	NA	9	-0.136478	0.0859096	0	NA	NA	9	0.0218284	0.0490609	0	0.146337	0.0864536	0	274.782
2010-01-28 06:30:00	NA	NA	9	NA	NA	9	910.998	0.331087	0	NA	NA	9	NA	NA	9	2.86849	0.0354767	0	NA	NA	9	NA	NA	9	3.83353	0.00398281	0	NA	NA	9	42.8963	0.0418895	0	NA	NA	9	-0.134468	0.0596417	0	NA	NA	9	0.0663448	0.0371967	0	0.155209	0.0577367	0	294.621
2010-01-28 07:30:00	NA	NA	9	NA	NA	9	911.174	0.27202	0	NA	NA	9	NA	NA	9	2.83239	0.0179211	0	NA	NA	9	NA	NA	9	3.83069	0.00341242	0	NA	NA	9	42.9083	0.045349	0	NA	NA	9	-0.150993	0.0453202	0	NA	NA	9	0.0515077	0.0328226	0	0.162585	0.0463551	0	288.335
2010-01-28 08:30:00	NA	NA	9	NA	NA	9	911.001	0.297767	0	NA	NA	9	NA	NA	9	2.85855	0.0139744	0	NA	NA	9	NA	NA	9	3.83319	0.0033655	0	NA	NA	9	42.9052	0.043446	0	NA	NA	9	-0.0587975	0.033124	0	NA	NA	9	-0.00762985	0.0182635	0	0.0622619	0.0327012	0	261.551
2010-01-28 09:30:00	NA	NA	9	NA	NA	9	910.522	0.292723	0	NA	NA	9	NA	NA	9	2.89688	0.0146149	0	NA	NA	9	NA	NA	9	3.84025	0.00408856	0	NA	NA	9	42.9432	0.0545989	0	NA	NA	9	-0.00951696	0.00850662	0	NA	NA	9	0.0184732	0.01108	0	0.0217521	0.0124011	0	293.513
2010-01-28 10:30:00	NA	NA	9	NA	NA	9	910.269	0.322717	0	NA	NA	9	NA	NA	9	2.91366	0.0166337	0	NA	NA	9	NA	NA	9	3.8391	0.00413899	0	NA	NA	9	42.9067	0.0537219	0	NA	NA	9	-0.00221103	0.00993306	0	NA	NA	9	0.0515076	0.020302	0	0.0527633	0.0196145	0	201.895
2010-01-28 11:30:00	NA	NA	9	NA	NA	9	910.074	0.300372	0	NA	NA	9	NA	NA	9	2.91674	0.0188721	0	NA	NA	9	NA	NA	9	3.83856	0.00385875	0	NA	NA	9	42.8959	0.0476619	0	NA	NA	9	0.0220487	0.0192564	0	NA	NA	9	0.0590141	0.0170475	0	0.0667998	0.012952	0	43.8526
2010-01-28 12:30:00	NA	NA	9	NA	NA	9	910.288	0.302412	0	NA	NA	9	NA	NA	9	2.8045	0.0266277	0	NA	NA	9	NA	NA	9	3.831	0.00414126	0	NA	NA	9	42.9498	0.0511871	0	NA	NA	9	0.0783324	0.0176927	0	NA	NA	9	0.0285224	0.0102499	0	0.0841668	0.016836	0	69.4605
2010-01-28 13:30:00	NA	NA	9	NA	NA	9	910.476	0.30813	0	NA	NA	9	NA	NA	9	2.78584	0.0187214	0	NA	NA	9	NA	NA	9	3.82936	0.00367718	0	NA	NA	9	42.9539	0.0463195	0	NA	NA	9	0.022779	0.019932	0	NA	NA	9	0.0457171	0.00961653	0	0.0542215	0.0125917	0	69.4778
2010-01-28 14:30:00	NA	NA	9	NA	NA	9	910.799	0.316014	0	NA	NA	9	NA	NA	9	2.78687	0.0177332	0	NA	NA	9	NA	NA	9	3.8292	0.00409028	0	NA	NA	9	42.9504	0.050143	0	NA	NA	9	-0.0194674	0.0393974	0	NA	NA	9	0.0406523	0.0135744	0	0.0532711	0.030492	0	224.548
2010-01-28 15:30:00	NA	NA	9	NA	NA	9	911.441	0.33657	0	NA	NA	9	NA	NA	9	2.75361	0.017892	0	NA	NA	9	NA	NA	9	3.82443	0.00354002	0	NA	NA	9	42.9341	0.0397346	0	NA	NA	9	-0.197244	0.0505805	0	NA	NA	9	0.0671237	0.0251215	0	0.210201	0.0491483	0	289.625
2010-01-28 16:30:00	NA	NA	9	NA	NA	9	911.721	0.318103	0	NA	NA	9	NA	NA	9	2.83352	0.0728749	0	NA	NA	9	NA	NA	9	3.83155	0.0060584	0	NA	NA	9	42.9173	0.0487424	0	NA	NA	9	-0.198804	0.0745089	0	NA	NA	9	0.0391806	0.0685025	0	0.216216	0.0674502	0	279.073
2010-01-28 17:30:00	NA	NA	9	NA	NA	9	911.816	0.306962	0	NA	NA	9	NA	NA	9	2.96461	0.0171661	0	NA	NA	9	NA	NA	9	3.84089	0.00288786	0	NA	NA	9	42.8605	0.0404018	0	NA	NA	9	-0.194876	0.0504145	0	NA	NA	9	-0.0131639	0.043436	0	0.200198	0.0499799	0	266.065
2010-01-28 18:30:00	NA	NA	9	NA	NA	9	911.931	0.310512	0	NA	NA	9	NA	NA	9	2.93741	0.0218201	0	NA	NA	9	NA	NA	9	3.83951	0.00310336	0	NA	NA	9	42.8793	0.040655	0	NA	NA	9	-0.178643	0.0420173	0	NA	NA	9	0.0744811	0.0195258	0	0.195384	0.037846	0	293.302
2010-01-28 19:30:00	NA	NA	9	NA	NA	9	911.638	0.331846	0	NA	NA	9	NA	NA	9	2.95017	0.0244671	0	NA	NA	9	NA	NA	9	3.84058	0.00367636	0	NA	NA	9	42.8759	0.0465884	0	NA	NA	9	-0.159878	0.0418153	0	NA	NA	9	0.0537108	0.0261934	0	0.171505	0.0382833	0	289.65
2010-01-28 20:30:00	NA	NA	9	NA	NA	9	910.964	0.401995	0	NA	NA	9	NA	NA	9	2.98994	0.0203676	0	NA	NA	9	NA	NA	9	3.84357	0.00354729	0	NA	NA	9	42.8612	0.0438789	0	NA	NA	9	-0.0951535	0.034309	0	NA	NA	9	0.0478423	0.0164891	0	0.108768	0.0310064	0	297.745
2010-01-28 21:30:00	NA	NA	9	NA	NA	9	910.14	0.356029	0	NA	NA	9	NA	NA	9	3.00544	0.0197489	0	NA	NA	9	NA	NA	9	3.84526	0.00355189	0	NA	NA	9	42.8623	0.0479258	0	NA	NA	9	-0.0639679	0.0364504	0	NA	NA	9	0.0436735	0.0147303	0	0.0804723	0.0326929	0	298.51
2010-01-28 22:30:00	NA	NA	9	NA	NA	9	909.413	0.3557	0	NA	NA	9	NA	NA	9	2.99123	0.0130417	0	NA	NA	9	NA	NA	9	3.84428	0.00364059	0	NA	NA	9	42.8693	0.0487489	0	NA	NA	9	0.0291793	0.0353482	0	NA	NA	9	0.0653106	0.0339254	0	0.0772804	0.0393016	0	79.3057
2010-01-28 23:30:00	NA	NA	9	NA	NA	9	908.707	0.328531	0	NA	NA	9	NA	NA	9	2.98311	0.0129251	0	NA	NA	9	NA	NA	9	3.84534	0.0045982	0	NA	NA	9	42.8938	0.0582211	0	NA	NA	9	0.0749891	0.0169037	0	NA	NA	9	0.0641616	0.0280833	0	0.101297	0.0235202	0	51.0685
2010-01-29 00:30:00	NA	NA	9	NA	NA	9	908.381	0.279555	0	NA	NA	9	NA	NA	9	2.90127	0.0375005	0	NA	NA	9	NA	NA	9	3.8375	0.0050017	0	NA	NA	9	42.9041	0.0456177	0	NA	NA	9	0.0763172	0.027508	0	NA	NA	9	0.0907354	0.0251471	0	0.121718	0.0251107	0	41.3546
2010-01-29 01:30:00	NA	NA	9	NA	NA	9	908.434	0.32974	0	NA	NA	9	NA	NA	9	2.82569	0.020234	0	NA	NA	9	NA	NA	9	3.83147	0.0037632	0	NA	NA	9	42.9287	0.0469626	0	NA	NA	9	0.0504321	0.0233798	0	NA	NA	9	0.108707	0.0253932	0	0.122362	0.0240674	0	27.1288
2010-01-29 02:30:00	NA	NA	9	NA	NA	9	908.704	0.355812	0	NA	NA	9	NA	NA	9	2.80098	0.0134689	0	NA	NA	9	NA	NA	9	3.83057	0.00362464	0	NA	NA	9	42.9501	0.0436541	0	NA	NA	9	0.046784	0.014137	0	NA	NA	9	0.0683873	0.0278653	0	0.0851348	0.0243668	0	36.5429
2010-01-29 03:30:00	NA	NA	9	NA	NA	9	909.239	0.359192	0	NA	NA	9	NA	NA	9	2.77447	0.0119124	0	NA	NA	9	NA	NA	9	3.8288	0.00411225	0	NA	NA	9	42.9628	0.0539946	0	NA	NA	9	0.012491	0.0134994	0	NA	NA	9	0.0224382	0.00752188	0	0.028453	0.00941563	0	73.9323
2010-01-29 04:30:00	NA	NA	9	NA	NA	9	909.896	0.323817	0	NA	NA	9	NA	NA	9	2.78711	0.0138365	0	NA	NA	9	NA	NA	9	3.83037	0.00382335	0	NA	NA	9	42.9653	0.0488644	0	NA	NA	9	-0.00262175	0.0148144	0	NA	NA	9	-0.00954938	0.0151997	0	0.0206877	0.0109726	0	173.452
2010-01-29 05:30:00	NA	NA	9	NA	NA	9	910.56	0.356342	0	NA	NA	9	NA	NA	9	2.80746	0.0146962	0	NA	NA	9	NA	NA	9	3.83225	0.00387856	0	NA	NA	9	42.9616	0.0522355	0	NA	NA	9	-0.0186804	0.0136435	0	NA	NA	9	-0.0178734	0.0154994	0	0.0294896	0.0150016	0	228.29
2010-01-29 06:30:00	NA	NA	9	NA	NA	9	911.045	0.300752	0	NA	NA	9	NA	NA	9	2.83508	0.0127618	0	NA	NA	9	NA	NA	9	3.83232	0.00344169	0	NA	NA	9	42.9254	0.0453555	0	NA	NA	9	-0.0594537	0.0209032	0	NA	NA	9	0.0137219	0.0087139	0	0.0619454	0.0199652	0	285.019
2010-01-29 07:30:00	NA	NA	9	NA	NA	9	911.251	0.294059	0	NA	NA	9	NA	NA	9	2.88146	0.0360436	0	NA	NA	9	NA	NA	9	3.83569	0.00401096	0	NA	NA	9	42.906	0.0495688	0	NA	NA	9	-0.0652979	0.0671743	0	NA	NA	9	0.0186271	0.029828	0	0.0739955	0.0673577	0	268.385
2010-01-29 08:30:00	NA	NA	9	NA	NA	9	911.209	0.275675	0	NA	NA	9	NA	NA	9	2.88433	0.021308	0	NA	NA	9	NA	NA	9	3.83564	0.00359035	0	NA	NA	9	42.9016	0.0425412	0	NA	NA	9	-0.121279	0.0486531	0	NA	NA	9	0.0604424	0.0217113	0	0.13886	0.0437925	0	299.238
2010-01-29 09:30:00	NA	NA	9	NA	NA	9	910.9	0.320826	0	NA	NA	9	NA	NA	9	2.89466	0.0156211	0	NA	NA	9	NA	NA	9	3.83793	0.00428809	0	NA	NA	9	42.9168	0.0546346	0	NA	NA	9	-0.0327331	0.026955	0	NA	NA	9	0.0239759	0.0148356	0	0.0450664	0.0237017	0	258.472
2010-01-29 10:30:00	NA	NA	9	NA	NA	9	910.429	0.348744	0	NA	NA	9	NA	NA	9	2.91603	0.0113775	0	NA	NA	9	NA	NA	9	3.83979	0.00355491	0	NA	NA	9	42.9121	0.0473758	0	NA	NA	9	-0.0177044	0.0236699	0	NA	NA	9	0.0230444	0.013762	0	0.0360535	0.0171474	0	262.014
2010-01-29 11:30:00	NA	NA	9	NA	NA	9	909.988	0.316459	0	NA	NA	9	NA	NA	9	2.93656	0.0259778	0	NA	NA	9	NA	NA	9	3.84041	0.00459301	0	NA	NA	9	42.8929	0.0534616	0	NA	NA	9	0.0142941	0.0373	0	NA	NA	9	0.0333456	0.0220834	0	0.0430995	0.0365697	0	161.117
2010-01-29 12:30:00	NA	NA	9	NA	NA	9	910.279	0.302836	0	NA	NA	9	NA	NA	9	2.70317	0.0353383	0	NA	NA	9	NA	NA	9	3.82175	0.00445603	0	NA	NA	9	42.9682	0.0495768	0	NA	NA	9	0.0929389	0.03331	0	NA	NA	9	0.111107	0.0161405	0	0.146006	0.0321651	0	38.5306
2010-01-29 13:30:00	NA	NA	9	NA	NA	9	910.302	0.296789	0	NA	NA	9	NA	NA	9	2.68344	0.00919229	0	NA	NA	9	NA	NA	9	3.82168	0.00393025	0	NA	NA	9	42.9937	0.0508628	0	NA	NA	9	0.0185837	0.0232527	0	NA	NA	9	0.032554	0.0208358	0	0.0411383	0.0262187	0	118.566
2010-01-29 14:30:00	NA	NA	9	NA	NA	9	910.576	0.316158	0	NA	NA	9	NA	NA	9	2.67206	0.00973964	0	NA	NA	9	NA	NA	9	3.8205	0.00413833	0	NA	NA	9	42.9938	0.0548787	0	NA	NA	9	0.0487771	0.0175124	0	NA	NA	9	0.024727	0.0130456	0	0.0560491	0.0180532	0	63.1456
2010-01-29 15:30:00	NA	NA	9	NA	NA	9	910.934	0.350043	0	NA	NA	9	NA	NA	9	2.67742	0.0113179	0	NA	NA	9	NA	NA	9	3.82119	0.00455369	0	NA	NA	9	42.9951	0.0575772	0	NA	NA	9	-0.00032836	0.00656199	0	NA	NA	9	0.033682	0.0131852	0	0.0344725	0.0127713	0	158.526
2010-01-29 16:30:00	NA	NA	9	NA	NA	9	911.52	0.364278	0	NA	NA	9	NA	NA	9	2.68908	0.0109694	0	NA	NA	9	NA	NA	9	3.82373	0.00443819	0	NA	NA	9	43.0112	0.0558898	0	NA	NA	9	0.00411618	0.0085481	0	NA	NA	9	0.023587	0.0126717	0	0.0251886	0.0131314	0	147.344
2010-01-29 17:30:00	NA	NA	9	NA	NA	9	912.015	0.32442	0	NA	NA	9	NA	NA	9	2.70829	0.0161817	0	NA	NA	9	NA	NA	9	3.82431	0.00400088	0	NA	NA	9	42.9926	0.0545241	0	NA	NA	9	-0.0180573	0.0113041	0	NA	NA	9	0.0216754	0.00711957	0	0.0299522	0.00878473	0	301.345
2010-01-29 18:30:00	NA	NA	9	NA	NA	9	912.252	0.297716	0	NA	NA	9	NA	NA	9	2.74899	0.0252718	0	NA	NA	9	NA	NA	9	3.82643	0.00381278	0	NA	NA	9	42.965	0.056425	0	NA	NA	9	-0.0526032	0.0421458	0	NA	NA	9	0.0405014	0.0247491	0	0.0710138	0.0418681	0	306.034
2010-01-29 19:30:00	NA	NA	9	NA	NA	9	912.47	0.287033	0	NA	NA	9	NA	NA	9	2.68888	0.025779	0	NA	NA	9	NA	NA	9	3.82022	0.00344469	0	NA	NA	9	42.9666	0.0391051	0	NA	NA	9	-0.126539	0.0571588	0	NA	NA	9	0.0795668	0.0270458	0	0.153856	0.0516636	0	303.298
2010-01-29 20:30:00	NA	NA	9	NA	NA	9	912.192	0.343962	0	NA	NA	9	NA	NA	9	2.69108	0.0380844	0	NA	NA	9	NA	NA	9	3.82006	0.00447295	0	NA	NA	9	42.9618	0.0391456	0	NA	NA	9	-0.125242	0.051947	0	NA	NA	9	0.0546437	0.0306411	0	0.139234	0.0540593	0	293.616
2010-01-29 21:30:00	NA	NA	9	NA	NA	9	911.33	0.414771	0	NA	NA	9	NA	NA	9	2.78292	0.0364487	0	NA	NA	9	NA	NA	9	3.82783	0.00436483	0	NA	NA	9	42.938	0.0439841	0	NA	NA	9	-0.0875967	0.0400349	0	NA	NA	9	0.0565349	0.0205824	0	0.107146	0.0376185	0	302.038
2010-01-29 22:30:00	NA	NA	9	NA	NA	9	910.361	0.383475	0	NA	NA	9	NA	NA	9	2.82234	0.0164178	0	NA	NA	9	NA	NA	9	3.83116	0.00315848	0	NA	NA	9	42.9281	0.0393351	0	NA	NA	9	-0.140237	0.0344469	0	NA	NA	9	0.038281	0.0293437	0	0.148861	0.0319282	0	285.882
2010-01-29 23:30:00	NA	NA	9	NA	NA	9	909.493	0.382932	0	NA	NA	9	NA	NA	9	2.84116	0.0232826	0	NA	NA	9	NA	NA	9	3.83372	0.00378348	0	NA	NA	9	42.9358	0.0440904	0	NA	NA	9	-0.0156275	0.0951126	0	NA	NA	9	0.064384	0.0406891	0	0.117059	0.0371952	0	171.067
2010-01-30 00:30:00	NA	NA	9	NA	NA	9	908.802	0.367552	0	NA	NA	9	NA	NA	9	2.81041	0.0254967	0	NA	NA	9	NA	NA	9	3.83159	0.00387859	0	NA	NA	9	42.9504	0.0483067	0	NA	NA	9	0.0215885	0.0289713	0	NA	NA	9	0.0680285	0.0310624	0	0.0751128	0.0354389	0	104.966
2010-01-30 01:30:00	NA	NA	9	NA	NA	9	908.383	0.324594	0	NA	NA	9	NA	NA	9	2.80948	0.013505	0	NA	NA	9	NA	NA	9	3.83174	0.00409624	0	NA	NA	9	42.9538	0.050076	0	NA	NA	9	0.00829571	0.0118974	0	NA	NA	9	0.0631208	0.0177974	0	0.0648738	0.0173969	0	79.52
2010-01-30 02:30:00	NA	NA	9	NA	NA	9	908.445	0.341164	0	NA	NA	9	NA	NA	9	2.74968	0.0515869	0	NA	NA	9	NA	NA	9	3.82694	0.00632022	0	NA	NA	9	42.9729	0.0515608	0	NA	NA	9	0.0704404	0.0307454	0	NA	NA	9	0.0627243	0.0239832	0	0.0963824	0.033569	0	46.7743
2010-01-30 03:30:00	NA	NA	9	NA	NA	9	908.931	0.368417	0	NA	NA	9	NA	NA	9	2.70278	0.0189255	0	NA	NA	9	NA	NA	9	3.82343	0.00377661	0	NA	NA	9	42.9908	0.047845	0	NA	NA	9	0.0856452	0.0113873	0	NA	NA	9	0.0826569	0.0101266	0	0.119385	0.0121104	0	45.9607
2010-01-30 04:30:00	NA	NA	9	NA	NA	9	909.487	0.35279	0	NA	NA	9	NA	NA	9	2.70019	0.013369	0	NA	NA	9	NA	NA	9	3.82294	0.00360375	0	NA	NA	9	42.9878	0.0464555	0	NA	NA	9	0.0663354	0.0274806	0	NA	NA	9	0.0726391	0.0162672	0	0.0994712	0.0283193	0	40.6579
2010-01-30 05:30:00	NA	NA	9	NA	NA	9	910.178	0.430352	0	NA	NA	9	NA	NA	9	2.70475	0.0102435	0	NA	NA	9	NA	NA	9	3.8243	0.00392404	0	NA	NA	9	42.9984	0.051619	0	NA	NA	9	-0.00682979	0.0130156	0	NA	NA	9	0.0250438	0.0118261	0	0.0289647	0.0120023	0	209.059
2010-01-30 06:30:00	NA	NA	9	NA	NA	9	910.851	0.321905	0	NA	NA	9	NA	NA	9	2.72013	0.0179829	0	NA	NA	9	NA	NA	9	3.82576	0.00458166	0	NA	NA	9	42.9959	0.0595897	0	NA	NA	9	-0.00594734	0.00977665	0	NA	NA	9	0.0228976	0.00478162	0	0.0250846	0.00698855	0	217.692
2010-01-30 07:30:00	NA	NA	9	NA	NA	9	911.45	0.367797	0	NA	NA	9	NA	NA	9	2.7275	0.0238202	0	NA	NA	9	NA	NA	9	3.82515	0.004738	0	NA	NA	9	42.9779	0.0531977	0	NA	NA	9	-0.0167672	0.0233779	0	NA	NA	9	0.023729	0.0223561	0	0.030871	0.0306178	0	292.905
2010-01-30 08:30:00	NA	NA	9	NA	NA	9	911.843	0.300064	0	NA	NA	9	NA	NA	9	2.66429	0.0280504	0	NA	NA	9	NA	NA	9	3.81758	0.00325102	0	NA	NA	9	42.9664	0.0383111	0	NA	NA	9	-0.114685	0.052297	0	NA	NA	9	0.0491781	0.0251801	0	0.129953	0.0452929	0	295.87
2010-01-30 09:30:00	NA	NA	9	NA	NA	9	911.719	0.368226	0	NA	NA	9	NA	NA	9	2.69028	0.0273018	0	NA	NA	9	NA	NA	9	3.81979	0.00725502	0	NA	NA	9	42.9598	0.089825	0	NA	NA	9	-0.127358	0.0560605	0	NA	NA	9	-0.00335531	0.0302028	0	0.132958	0.0510666	0	263.633
2010-01-30 10:30:00	NA	NA	9	NA	NA	9	911.346	0.307499	0	NA	NA	9	NA	NA	9	2.66642	0.0363204	0	NA	NA	9	NA	NA	9	3.81839	0.0044755	0	NA	NA	9	42.9741	0.0400231	0	NA	NA	9	-0.157106	0.0693033	0	NA	NA	9	0.0325501	0.0438231	0	0.167115	0.0673558	0	275.278
2010-01-30 11:30:00	NA	NA	9	NA	NA	9	910.809	0.388283	0	NA	NA	9	NA	NA	9	2.68788	0.0228978	0	NA	NA	9	NA	NA	9	3.82045	0.00308801	0	NA	NA	9	42.9718	0.0416803	0	NA	NA	9	-0.220097	0.0319232	0	NA	NA	9	0.00077998	0.0207933	0	0.221156	0.0313763	0	270.347
2010-01-30 12:30:00	NA	NA	9	NA	NA	9	910.226	0.325166	0	NA	NA	9	NA	NA	9	2.76117	0.0205243	0	NA	NA	9	NA	NA	9	3.82657	0.00370574	0	NA	NA	9	42.9518	0.0446032	0	NA	NA	9	-0.186392	0.0350596	0	NA	NA	9	0.0473036	0.0269758	0	0.194671	0.0322383	0	284.758
2010-01-30 13:30:00	NA	NA	9	NA	NA	9	909.867	0.309999	0	NA	NA	9	NA	NA	9	2.78378	0.0125404	0	NA	NA	9	NA	NA	9	3.82834	0.00324359	0	NA	NA	9	42.9442	0.0401805	0	NA	NA	9	-0.116028	0.0371531	0	NA	NA	9	0.0630237	0.0172367	0	0.134097	0.0336117	0	300.168
2010-01-30 14:30:00	NA	NA	9	NA	NA	9	909.91	0.318176	0	NA	NA	9	NA	NA	9	2.78868	0.0173891	0	NA	NA	9	NA	NA	9	3.82917	0.00334239	0	NA	NA	9	42.9481	0.042269	0	NA	NA	9	-0.0962418	0.0406322	0	NA	NA	9	0.0356711	0.0197469	0	0.106267	0.0358158	0	288.208
2010-01-30 15:30:00	NA	NA	9	NA	NA	9	910.134	0.344479	0	NA	NA	9	NA	NA	9	2.80586	0.026493	0	NA	NA	9	NA	NA	9	3.8314	0.00397282	0	NA	NA	9	42.9531	0.0476718	0	NA	NA	9	0.0295075	0.039557	0	NA	NA	9	0.0721233	0.0326771	0	0.0845933	0.0393495	0	108.431
2010-01-30 16:30:00	NA	NA	9	NA	NA	9	910.867	0.347371	0	NA	NA	9	NA	NA	9	2.75149	0.0169241	0	NA	NA	9	NA	NA	9	3.82787	0.00367028	0	NA	NA	9	42.9806	0.0461282	0	NA	NA	9	0.0821821	0.0244603	0	NA	NA	9	0.0714397	0.0127369	0	0.110121	0.0221663	0	47.9257
2010-01-30 17:30:00	NA	NA	9	NA	NA	9	911.462	0.354645	0	NA	NA	9	NA	NA	9	2.72663	0.01038	0	NA	NA	9	NA	NA	9	3.82734	0.00403817	0	NA	NA	9	43.0067	0.0531881	0	NA	NA	9	0.0324714	0.0142845	0	NA	NA	9	0.0282043	0.0157391	0	0.0447614	0.017262	0	50.0522
2010-01-30 18:30:00	NA	NA	9	NA	NA	9	911.963	0.321546	0	NA	NA	9	NA	NA	9	2.75055	0.0152387	0	NA	NA	9	NA	NA	9	3.82937	0.00443295	0	NA	NA	9	43.0002	0.0559053	0	NA	NA	9	-0.0102619	0.0107291	0	NA	NA	9	0.00633116	0.0122319	0	0.0184024	0.00844783	0	224.436
2010-01-30 19:30:00	NA	NA	9	NA	NA	9	912.184	0.30511	0	NA	NA	9	NA	NA	9	2.76042	0.00958235	0	NA	NA	9	NA	NA	9	3.83165	0.00446636	0	NA	NA	9	43.0155	0.0577151	0	NA	NA	9	0.000770662	0.00598168	0	NA	NA	9	0.0144464	0.00342421	0	0.0156898	0.00325705	0	159.387
2010-01-30 20:30:00	NA	NA	9	NA	NA	9	912.173	0.34569	0	NA	NA	9	NA	NA	9	2.78767	0.0311213	0	NA	NA	9	NA	NA	9	3.83155	0.00404633	0	NA	NA	9	42.9781	0.0656159	0	NA	NA	9	-0.0677023	0.0674663	0	NA	NA	9	0.00594786	0.0242919	0	0.0741033	0.0653375	0	263.771
2010-01-30 21:30:00	NA	NA	9	NA	NA	9	911.895	0.343591	0	NA	NA	9	NA	NA	9	2.81021	0.0248646	0	NA	NA	9	NA	NA	9	3.83005	0.00371515	0	NA	NA	9	42.9293	0.0439526	0	NA	NA	9	-0.162115	0.0576142	0	NA	NA	9	0.0185229	0.0485665	0	0.170007	0.0582996	0	273.131
2010-01-30 22:30:00	NA	NA	9	NA	NA	9	911.153	0.384207	0	NA	NA	9	NA	NA	9	2.82139	0.0164282	0	NA	NA	9	NA	NA	9	3.83121	0.00326167	0	NA	NA	9	42.9295	0.0426779	0	NA	NA	9	-0.228367	0.0354301	0	NA	NA	9	0.0397006	0.0341616	0	0.234281	0.0355151	0	279.69
2010-01-30 23:30:00	NA	NA	9	NA	NA	9	910.379	0.37321	0	NA	NA	9	NA	NA	9	2.7129	0.0345387	0	NA	NA	9	NA	NA	9	3.82189	0.00419566	0	NA	NA	9	42.957	0.0390806	0	NA	NA	9	-0.202848	0.0576738	0	NA	NA	9	0.0850595	0.0274242	0	0.223129	0.0517036	0	294.297
2010-01-31 00:30:00	NA	NA	9	NA	NA	9	909.462	0.45139	0	NA	NA	9	NA	NA	9	2.75197	0.0513146	0	NA	NA	9	NA	NA	9	3.82569	0.00513063	0	NA	NA	9	42.9534	0.0421615	0	NA	NA	9	-0.13856	0.0417935	0	NA	NA	9	0.0766737	0.0262599	0	0.160977	0.0400026	0	299.324
2010-01-31 01:30:00	NA	NA	9	NA	NA	9	908.67	0.330841	0	NA	NA	9	NA	NA	9	2.79598	0.0215835	0	NA	NA	9	NA	NA	9	3.82942	0.00336381	0	NA	NA	9	42.9424	0.0419421	0	NA	NA	9	-0.064432	0.0392467	0	NA	NA	9	-0.00180356	0.0229905	0	0.0686341	0.038893	0	269.122
2010-01-31 02:30:00	NA	NA	9	NA	NA	9	908.371	0.319834	0	NA	NA	9	NA	NA	9	2.79285	0.0277293	0	NA	NA	9	NA	NA	9	3.83076	0.00466728	0	NA	NA	9	42.9635	0.0456054	0	NA	NA	9	-0.0202669	0.0238005	0	NA	NA	9	-0.00478662	0.0329466	0	0.0408624	0.0203759	0	228.063
2010-01-31 03:30:00	NA	NA	9	NA	NA	9	908.373	0.38081	0	NA	NA	9	NA	NA	9	2.83953	0.0620522	0	NA	NA	9	NA	NA	9	3.83252	0.00630443	0	NA	NA	9	42.9237	0.0471222	0	NA	NA	9	0.0625941	0.0319444	0	NA	NA	9	0.13159	0.0487429	0	0.151199	0.0420497	0	35.586
2010-01-31 04:30:00	NA	NA	9	NA	NA	9	909.021	0.374809	0	NA	NA	9	NA	NA	9	2.73354	0.01891	0	NA	NA	9	NA	NA	9	3.82399	0.0033955	0	NA	NA	9	42.9569	0.0441537	0	NA	NA	9	0.047427	0.0221408	0	NA	NA	9	0.0715387	0.0399801	0	0.0892365	0.0386294	0	39.6918
2010-01-31 05:30:00	NA	NA	9	NA	NA	9	909.848	0.411379	0	NA	NA	9	NA	NA	9	2.69255	0.0112774	0	NA	NA	9	NA	NA	9	3.82101	0.0032048	0	NA	NA	9	42.9733	0.0437798	0	NA	NA	9	0.0152211	0.0336379	0	NA	NA	9	0.0867124	0.0553233	0	0.0957901	0.0525962	0	132.377
2010-01-31 06:30:00	NA	NA	9	NA	NA	9	910.735	0.361688	0	NA	NA	9	NA	NA	9	2.69316	0.0167464	0	NA	NA	9	NA	NA	9	3.82203	0.00369088	0	NA	NA	9	42.9849	0.0478758	0	NA	NA	9	0.0165293	0.0318147	0	NA	NA	9	-0.00938629	0.0533043	0	0.0595921	0.0257265	0	132.713
2010-01-31 07:30:00	NA	NA	9	NA	NA	9	911.361	0.349543	0	NA	NA	9	NA	NA	9	2.73862	0.0129174	0	NA	NA	9	NA	NA	9	3.82704	0.00427608	0	NA	NA	9	42.987	0.0525079	0	NA	NA	9	-0.00767033	0.0384609	0	NA	NA	9	-0.025478	0.0465066	0	0.0505778	0.0423194	0	157.319
2010-01-31 08:30:00	NA	NA	9	NA	NA	9	911.698	0.283299	0	NA	NA	9	NA	NA	9	2.76092	0.0142944	0	NA	NA	9	NA	NA	9	3.82777	0.00347167	0	NA	NA	9	42.9663	0.0437896	0	NA	NA	9	-0.0748518	0.0527754	0	NA	NA	9	0.0275108	0.0162885	0	0.0825465	0.0509512	0	290.443
2010-01-31 09:30:00	NA	NA	9	NA	NA	9	911.733	0.313512	0	NA	NA	9	NA	NA	9	2.81464	0.0261667	0	NA	NA	9	NA	NA	9	3.83	0.00391041	0	NA	NA	9	42.9229	0.0406696	0	NA	NA	9	-0.166482	0.0493519	0	NA	NA	9	0.000251049	0.0332708	0	0.170158	0.0480063	0	269.18
2010-01-31 10:30:00	NA	NA	9	NA	NA	9	911.486	0.318325	0	NA	NA	9	NA	NA	9	2.82244	0.0173508	0	NA	NA	9	NA	NA	9	3.83137	0.00303941	0	NA	NA	9	42.9299	0.0409322	0	NA	NA	9	-0.172955	0.0725451	0	NA	NA	9	0.00738669	0.0421717	0	0.179163	0.0700633	0	272.656
2010-01-31 11:30:00	NA	NA	9	NA	NA	9	911.189	0.341256	0	NA	NA	9	NA	NA	9	2.71286	0.0357215	0	NA	NA	9	NA	NA	9	3.82273	0.00421688	0	NA	NA	9	42.9672	0.0422454	0	NA	NA	9	-0.224427	0.0459111	0	NA	NA	9	0.0165132	0.0300064	0	0.227211	0.0449743	0	274.491
2010-01-31 12:30:00	NA	NA	9	NA	NA	9	910.558	0.36188	0	NA	NA	9	NA	NA	9	2.70587	0.0252288	0	NA	NA	9	NA	NA	9	3.82148	0.0034964	0	NA	NA	9	42.9611	0.03892	0	NA	NA	9	-0.16215	0.0546859	0	NA	NA	9	0.0736194	0.0235724	0	0.180606	0.051375	0	296.1
2010-01-31 13:30:00	NA	NA	9	NA	NA	9	909.983	0.328921	0	NA	NA	9	NA	NA	9	2.75696	0.0295536	0	NA	NA	9	NA	NA	9	3.82567	0.00395725	0	NA	NA	9	42.9462	0.0397443	0	NA	NA	9	-0.0455238	0.0397025	0	NA	NA	9	-0.00727858	0.0289144	0	0.0548961	0.0390339	0	248.313
2010-01-31 14:30:00	NA	NA	9	NA	NA	9	909.533	0.329993	0	NA	NA	9	NA	NA	9	2.81461	0.0273544	0	NA	NA	9	NA	NA	9	3.83093	0.00399342	0	NA	NA	9	42.936	0.046791	0	NA	NA	9	-0.0322603	0.0237048	0	NA	NA	9	0.0127932	0.0166822	0	0.0380222	0.0244701	0	273.521
2010-01-31 15:30:00	NA	NA	9	NA	NA	9	909.449	0.310978	0	NA	NA	9	NA	NA	9	2.84888	0.0203381	0	NA	NA	9	NA	NA	9	3.83486	0.00382229	0	NA	NA	9	42.9399	0.0500431	0	NA	NA	9	0.0275749	0.0331507	0	NA	NA	9	0.0337224	0.0346813	0	0.0458188	0.0458242	0	57.6694
2010-01-31 16:30:00	NA	NA	9	NA	NA	9	910.014	0.341576	0	NA	NA	9	NA	NA	9	2.82534	0.0127487	0	NA	NA	9	NA	NA	9	3.83212	0.00311003	0	NA	NA	9	42.9364	0.041652	0	NA	NA	9	0.0379975	0.0314367	0	NA	NA	9	0.0856617	0.0172492	0	0.0969182	0.0259629	0	49.716
2010-01-31 17:30:00	NA	NA	9	NA	NA	9	910.543	0.350698	0	NA	NA	9	NA	NA	9	2.82712	0.0126994	0	NA	NA	9	NA	NA	9	3.83184	0.00314996	0	NA	NA	9	42.9301	0.0433715	0	NA	NA	9	0.0258066	0.0105271	0	NA	NA	9	0.0562038	0.0128637	0	0.0625152	0.0138905	0	30.6877
2010-01-31 18:30:00	NA	NA	9	NA	NA	9	911.256	0.383979	0	NA	NA	9	NA	NA	9	2.8162	0.0120912	0	NA	NA	9	NA	NA	9	3.83322	0.00378054	0	NA	NA	9	42.9616	0.0504723	0	NA	NA	9	0.0370564	0.00576452	0	NA	NA	9	0.0390348	0.00789181	0	0.0542216	0.00723842	0	43.7375
2010-01-31 19:30:00	NA	NA	9	NA	NA	9	911.884	0.332417	0	NA	NA	9	NA	NA	9	2.80918	0.00939233	0	NA	NA	9	NA	NA	9	3.83348	0.00392168	0	NA	NA	9	42.9739	0.0504374	0	NA	NA	9	0.00552044	0.0131358	0	NA	NA	9	0.0101588	0.0100283	0	0.0161658	0.0120577	0	182.474
2010-01-31 20:30:00	NA	NA	9	NA	NA	9	912.2	0.314977	0	NA	NA	9	NA	NA	9	2.80229	0.0195071	0	NA	NA	9	NA	NA	9	3.83006	0.00369838	0	NA	NA	9	42.9398	0.0441916	0	NA	NA	9	-0.054273	0.0409669	0	NA	NA	9	0.0404391	0.02204	0	0.0700669	0.0428412	0	304.685
2010-01-31 21:30:00	NA	NA	9	NA	NA	9	912.137	0.329294	0	NA	NA	9	NA	NA	9	2.81307	0.0224476	0	NA	NA	9	NA	NA	9	3.83072	0.00328939	0	NA	NA	9	42.9337	0.0404393	0	NA	NA	9	-0.104793	0.0476483	0	NA	NA	9	0.000527263	0.0355211	0	0.110828	0.047227	0	266.494
2010-01-31 22:30:00	NA	NA	9	NA	NA	9	911.686	0.392286	0	NA	NA	9	NA	NA	9	2.84361	0.0292133	0	NA	NA	9	NA	NA	9	3.83325	0.00375926	0	NA	NA	9	42.9253	0.0452894	0	NA	NA	9	-0.0980814	0.029127	0	NA	NA	9	0.0250242	0.01846	0	0.102946	0.0289351	0	284.059
2010-01-31 23:30:00	NA	NA	9	NA	NA	9	910.739	0.412046	0	NA	NA	9	NA	NA	9	2.92464	0.014892	0	NA	NA	9	NA	NA	9	3.83987	0.00336101	0	NA	NA	9	42.9014	0.0464252	0	NA	NA	9	-0.0993429	0.0341209	0	NA	NA	9	0.0352446	0.0183429	0	0.106829	0.0346311	0	289.901
2010-02-01 00:30:00	NA	NA	9	NA	NA	9	909.616	0.419048	0	NA	NA	9	NA	NA	9	3.00264	0.0345411	0	NA	NA	9	NA	NA	9	3.84534	0.00459056	0	NA	NA	9	42.8673	0.0462188	0	NA	NA	9	-0.0887731	0.0287028	0	NA	NA	9	0.0400239	0.0166883	0	0.0994189	0.0264686	0	295.583
2010-02-01 01:30:00	NA	NA	9	NA	NA	9	908.84	0.335845	0	NA	NA	9	NA	NA	9	3.00821	0.0442195	0	NA	NA	9	NA	NA	9	3.84627	0.00514483	0	NA	NA	9	42.8721	0.0514823	0	NA	NA	9	0.0376185	0.0543744	0	NA	NA	9	0.0384896	0.0322541	0	0.0741624	0.0373094	0	135.807
2010-02-01 02:30:00	NA	NA	9	NA	NA	9	908.471	0.332079	0	NA	NA	9	NA	NA	9	2.91208	0.0146309	0	NA	NA	9	NA	NA	9	3.84039	0.00404706	0	NA	NA	9	42.926	0.0520378	0	NA	NA	9	0.0146296	0.0288087	0	NA	NA	9	0.0967876	0.0281519	0	0.101779	0.0290676	0	157.243
2010-02-01 03:30:00	NA	NA	9	NA	NA	9	908.212	0.306957	0	NA	NA	9	NA	NA	9	2.9324	0.0108051	0	NA	NA	9	NA	NA	9	3.84093	0.00367989	0	NA	NA	9	42.9061	0.0477717	0	NA	NA	9	0.0400855	0.0267196	0	NA	NA	9	0.097061	0.0160378	0	0.10856	0.0145982	0	37.5599
2010-02-01 04:30:00	NA	NA	9	NA	NA	9	908.552	0.379339	0	NA	NA	9	NA	NA	9	2.86794	0.0264402	0	NA	NA	9	NA	NA	9	3.83559	0.00401856	0	NA	NA	9	42.9243	0.0479012	0	NA	NA	9	0.087414	0.0196583	0	NA	NA	9	0.102669	0.0191134	0	0.136118	0.0201387	0	40.3122
2010-02-01 05:30:00	NA	NA	9	NA	NA	9	909.228	0.38994	0	NA	NA	9	NA	NA	9	2.82394	0.0254082	0	NA	NA	9	NA	NA	9	3.83157	0.00395912	0	NA	NA	9	42.9319	0.0446934	0	NA	NA	9	0.0319163	0.0301589	0	NA	NA	9	0.115341	0.0310422	0	0.12342	0.0310194	0	77.6321
2010-02-01 06:30:00	NA	NA	9	NA	NA	9	910.003	0.389515	0	NA	NA	9	NA	NA	9	2.84269	0.015629	0	NA	NA	9	NA	NA	9	3.83352	0.00366644	0	NA	NA	9	42.931	0.0469224	0	NA	NA	9	0.0557178	0.0333427	0	NA	NA	9	0.0665769	0.0332004	0	0.091332	0.0375363	0	48.913
2010-02-01 07:30:00	NA	NA	9	NA	NA	9	910.957	0.350581	0	NA	NA	9	NA	NA	9	2.79547	0.017968	0	NA	NA	9	NA	NA	9	3.83012	0.00370105	0	NA	NA	9	42.9504	0.0480226	0	NA	NA	9	0.0698239	0.0214968	0	NA	NA	9	0.0198045	0.0281686	0	0.077982	0.0210127	0	74.7227
2010-02-01 08:30:00	NA	NA	9	NA	NA	9	911.565	0.32657	0	NA	NA	9	NA	NA	9	2.79142	0.0227402	0	NA	NA	9	NA	NA	9	3.82971	0.00411167	0	NA	NA	9	42.9502	0.043904	0	NA	NA	9	-0.0336569	0.0424937	0	NA	NA	9	0.0299775	0.0196268	0	0.0559222	0.0330826	0	231.118
2010-02-01 09:30:00	NA	NA	9	NA	NA	9	911.869	0.328942	0	NA	NA	9	NA	NA	9	2.83368	0.0255161	0	NA	NA	9	NA	NA	9	3.83268	0.00363562	0	NA	NA	9	42.9312	0.0448774	0	NA	NA	9	-0.094404	0.0371436	0	NA	NA	9	0.0153249	0.0267609	0	0.0998814	0.0355812	0	280.291
2010-02-01 10:30:00	NA	NA	9	NA	NA	9	911.792	0.332252	0	NA	NA	9	NA	NA	9	2.83371	0.0188906	0	NA	NA	9	NA	NA	9	3.83267	0.00330721	0	NA	NA	9	42.9311	0.045356	0	NA	NA	9	-0.0933475	0.0477212	0	NA	NA	9	0.00940377	0.040484	0	0.101674	0.0487846	0	269.893
2010-02-01 11:30:00	NA	NA	9	NA	NA	9	911.515	0.367241	0	NA	NA	9	NA	NA	9	2.82766	0.0163795	0	NA	NA	9	NA	NA	9	3.83174	0.00342533	0	NA	NA	9	42.9276	0.0434517	0	NA	NA	9	-0.149225	0.033879	0	NA	NA	9	0.0586978	0.019819	0	0.162103	0.031249	0	292.18
2010-02-01 12:30:00	NA	NA	9	NA	NA	9	910.791	0.347615	0	NA	NA	9	NA	NA	9	2.82492	0.0188407	0	NA	NA	9	NA	NA	9	3.83149	0.00352335	0	NA	NA	9	42.9286	0.0453277	0	NA	NA	9	-0.137668	0.0490609	0	NA	NA	9	0.0698305	0.0240638	0	0.157663	0.0442315	0	298.626
2010-02-01 13:30:00	NA	NA	9	NA	NA	9	910.206	0.347599	0	NA	NA	9	NA	NA	9	2.80007	0.0121297	0	NA	NA	9	NA	NA	9	3.82895	0.00288602	0	NA	NA	9	42.9299	0.0385953	0	NA	NA	9	-0.0952004	0.0380915	0	NA	NA	9	0.022812	0.026896	0	0.100349	0.0410807	0	280.968
2010-02-01 14:30:00	NA	NA	9	NA	NA	9	909.55	0.325274	0	NA	NA	9	NA	NA	9	2.81237	0.0181391	0	NA	NA	9	NA	NA	9	3.83111	0.00346181	0	NA	NA	9	42.9413	0.0412496	0	NA	NA	9	-0.00545934	0.0270931	0	NA	NA	9	0.0375602	0.0247321	0	0.0461831	0.0255543	0	201.522
2010-02-01 15:30:00	NA	NA	9	NA	NA	9	909.26	0.326285	0	NA	NA	9	NA	NA	9	2.8077	0.0139895	0	NA	NA	9	NA	NA	9	3.83271	0.00376466	0	NA	NA	9	42.9678	0.0474612	0	NA	NA	9	-0.0070236	0.0110862	0	NA	NA	9	0.0242009	0.00580225	0	0.027003	0.00789744	0	226.167
2010-02-01 16:30:00	NA	NA	9	NA	NA	9	909.722	0.660718	0	NA	NA	9	NA	NA	9	2.81652	0.0156933	0	NA	NA	9	NA	NA	9	3.83348	0.0044482	0	NA	NA	9	42.9654	0.0566477	0	NA	NA	9	0.000305894	0.0139541	0	NA	NA	9	0.00106609	0.019101	0	0.0218587	0.00909543	0	170.008
2010-02-01 17:30:00	NA	NA	9	NA	NA	9	911.593	0.45265	0	NA	NA	9	NA	NA	9	2.76111	0.0400929	0	NA	NA	9	NA	NA	9	3.8266	0.00562178	0	NA	NA	9	42.9513	0.0463775	0	NA	NA	9	0.0404996	0.015249	0	NA	NA	9	0.0543213	0.0184354	0	0.0687394	0.0209341	0	37.2762
2010-02-01 18:30:00	NA	NA	9	NA	NA	9	912.34	0.376315	0	NA	NA	9	NA	NA	9	2.74008	0.0141261	0	NA	NA	9	NA	NA	9	3.8263	0.00391296	0	NA	NA	9	42.9751	0.0503921	0	NA	NA	9	0.00061988	0.0150353	0	NA	NA	9	-0.00470027	0.02336	0	0.0235221	0.0155126	0	151.878
2010-02-01 19:30:00	NA	NA	9	NA	NA	9	913.038	0.381915	0	NA	NA	9	NA	NA	9	2.74979	0.0118829	0	NA	NA	9	NA	NA	9	3.82675	0.00377504	0	NA	NA	9	42.9675	0.0491875	0	NA	NA	9	-0.0212329	0.00776666	0	NA	NA	9	-0.0306293	0.0121925	0	0.0377502	0.0131481	0	215.925
2010-02-01 20:30:00	NA	NA	9	NA	NA	9	913.493	0.340603	0	NA	NA	9	NA	NA	9	2.78271	0.0263968	0	NA	NA	9	NA	NA	9	3.8288	0.00389628	0	NA	NA	9	42.9491	0.045884	0	NA	NA	9	-0.0522838	0.0387296	0	NA	NA	9	-0.0477283	0.0154665	0	0.0761475	0.0308528	0	221.833
2010-02-01 21:30:00	NA	NA	9	NA	NA	9	913.891	0.314721	0	NA	NA	9	NA	NA	9	2.71869	0.0282912	0	NA	NA	9	NA	NA	9	3.8218	0.00370347	0	NA	NA	9	42.946	0.043838	0	NA	NA	9	-0.122782	0.0353835	0	NA	NA	9	-0.0519842	0.0268129	0	0.136169	0.0347295	0	246.435
2010-02-01 22:30:00	NA	NA	9	NA	NA	9	913.582	0.38079	0	NA	NA	9	NA	NA	9	2.84557	0.0607312	0	NA	NA	9	NA	NA	9	3.83304	0.00596109	0	NA	NA	9	42.9189	0.0503505	0	NA	NA	9	-0.136394	0.0354272	0	NA	NA	9	-0.0869471	0.0450405	0	0.16633	0.0421965	0	238.299
2010-02-01 23:30:00	NA	NA	9	NA	NA	9	913.066	0.378378	0	NA	NA	9	NA	NA	9	2.8697	0.0325141	0	NA	NA	9	NA	NA	9	3.83518	0.0040604	0	NA	NA	9	42.914	0.0422996	0	NA	NA	9	-0.0768193	0.0304999	0	NA	NA	9	-0.0384959	0.0309089	0	0.0903818	0.0331575	0	243.874
2010-02-02 00:30:00	NA	NA	9	NA	NA	9	912.079	0.442327	0	NA	NA	9	NA	NA	9	2.97019	0.0257876	0	NA	NA	9	NA	NA	9	3.84426	0.00429625	0	NA	NA	9	42.8953	0.0475945	0	NA	NA	9	-0.0408468	0.0348753	0	NA	NA	9	-0.0243855	0.0187957	0	0.0502197	0.0362011	0	232.673
2010-02-02 01:30:00	NA	NA	9	NA	NA	9	911.258	0.384815	0	NA	NA	9	NA	NA	9	2.93414	0.011868	0	NA	NA	9	NA	NA	9	3.84216	0.00389015	0	NA	NA	9	42.9172	0.0492597	0	NA	NA	9	-0.00979631	0.0193555	0	NA	NA	9	-0.0417145	0.0175405	0	0.0478809	0.0150181	0	188.732
2010-02-02 02:30:00	NA	NA	9	NA	NA	9	910.43	0.309149	0	NA	NA	9	NA	NA	9	2.96196	0.020209	0	NA	NA	9	NA	NA	9	3.8446	0.00422596	0	NA	NA	9	42.9115	0.0545244	0	NA	NA	9	0.0351306	0.0225066	0	NA	NA	9	0.0101756	0.0241476	0	0.0431998	0.0236819	0	89.9399
2010-02-02 03:30:00	NA	NA	9	NA	NA	9	910.295	0.29347	0	NA	NA	9	NA	NA	9	2.84682	0.0644947	0	NA	NA	9	NA	NA	9	3.83328	0.00642446	0	NA	NA	9	42.9223	0.0423531	0	NA	NA	9	0.0450925	0.0311226	0	NA	NA	9	0.053558	0.0310807	0	0.0762864	0.0318795	0	62.5795
2010-02-02 04:30:00	NA	NA	9	NA	NA	9	910.48	0.298442	0	NA	NA	9	NA	NA	9	2.73926	0.0218555	0	NA	NA	9	NA	NA	9	3.82526	0.00374434	0	NA	NA	9	42.9644	0.0465143	0	NA	NA	9	0.0179007	0.0240205	0	NA	NA	9	-0.0194606	0.0314687	0	0.0414593	0.0233875	0	144.936
2010-02-02 05:30:00	NA	NA	9	NA	NA	9	910.854	0.334933	0	NA	NA	9	NA	NA	9	2.72546	0.0147544	0	NA	NA	9	NA	NA	9	3.82339	0.00368712	0	NA	NA	9	42.9588	0.0469312	0	NA	NA	9	0.0577181	0.0327419	0	NA	NA	9	-0.0124108	0.0238486	0	0.0659887	0.0277705	0	109.444
2010-02-02 06:30:00	NA	NA	9	NA	NA	9	911.519	0.331085	0	NA	NA	9	NA	NA	9	2.70974	0.011475	0	NA	NA	9	NA	NA	9	3.82337	0.00399576	0	NA	NA	9	42.9791	0.0503056	0	NA	NA	9	0.0380058	0.024833	0	NA	NA	9	-0.0098846	0.0125243	0	0.0422516	0.0230293	0	111.142
2010-02-02 07:30:00	NA	NA	9	NA	NA	9	912.315	0.402267	0	NA	NA	9	NA	NA	9	2.72433	0.0140788	0	NA	NA	9	NA	NA	9	3.82521	0.00407225	0	NA	NA	9	42.9824	0.0531035	0	NA	NA	9	0.0312158	0.0178004	0	NA	NA	9	-0.0171665	0.00983719	0	0.0380466	0.0153331	0	124.176
2010-02-02 08:30:00	NA	NA	9	NA	NA	9	913.119	0.358474	0	NA	NA	9	NA	NA	9	2.72242	0.0124185	0	NA	NA	9	NA	NA	9	3.82524	0.00381892	0	NA	NA	9	42.9848	0.0520929	0	NA	NA	9	-0.0197185	0.0155588	0	NA	NA	9	-0.0205775	0.0159228	0	0.0329531	0.014893	0	225.241
2010-02-02 09:30:00	NA	NA	9	NA	NA	9	913.633	0.32195	0	NA	NA	9	NA	NA	9	2.76973	0.0207819	0	NA	NA	9	NA	NA	9	3.82728	0.0032188	0	NA	NA	9	42.9472	0.0402319	0	NA	NA	9	-0.0500534	0.0281281	0	NA	NA	9	-0.042605	0.019839	0	0.0678813	0.0299545	0	227.084
2010-02-02 10:30:00	NA	NA	9	NA	NA	9	913.731	0.283868	0	NA	NA	9	NA	NA	9	2.79594	0.0129224	0	NA	NA	9	NA	NA	9	3.82941	0.00290322	0	NA	NA	9	42.939	0.0413102	0	NA	NA	9	-0.0800933	0.0269953	0	NA	NA	9	-0.0369683	0.0186184	0	0.0904567	0.0259682	0	244.113
2010-02-02 11:30:00	NA	NA	9	NA	NA	9	913.577	0.326109	0	NA	NA	9	NA	NA	9	2.8314	0.0266206	0	NA	NA	9	NA	NA	9	3.83202	0.00630468	0	NA	NA	9	42.9249	0.0746026	0	NA	NA	9	-0.107772	0.0363662	0	NA	NA	9	-0.0570856	0.0317775	0	0.124739	0.0405676	0	242.234
2010-02-02 12:30:00	NA	NA	9	NA	NA	9	912.993	0.385907	0	NA	NA	9	NA	NA	9	2.86187	0.028349	0	NA	NA	9	NA	NA	9	3.83454	0.00385611	0	NA	NA	9	42.9164	0.0380565	0	NA	NA	9	-0.0747851	0.0319104	0	NA	NA	9	-0.0511646	0.0211367	0	0.0927393	0.0327852	0	233.958
2010-02-02 13:30:00	NA	NA	9	NA	NA	9	912.386	0.3168	0	NA	NA	9	NA	NA	9	2.80776	0.046605	0	NA	NA	9	NA	NA	9	3.82987	0.00452729	0	NA	NA	9	42.93	0.0404856	0	NA	NA	9	-0.0860813	0.0266815	0	NA	NA	9	-0.074521	0.022499	0	0.115657	0.0283657	0	228.611
2010-02-02 14:30:00	NA	NA	9	NA	NA	9	911.672	0.436709	0	NA	NA	9	NA	NA	9	2.85006	0.0512766	0	NA	NA	9	NA	NA	9	3.83481	0.00665634	0	NA	NA	9	42.9363	0.0467494	0	NA	NA	9	-0.0349474	0.0286896	0	NA	NA	9	-0.0302115	0.0273312	0	0.051453	0.032503	0	229.794
2010-02-02 15:30:00	NA	NA	9	NA	NA	9	911.044	0.328433	0	NA	NA	9	NA	NA	9	2.86684	0.0250877	0	NA	NA	9	NA	NA	9	3.8365	0.0047986	0	NA	NA	9	42.9356	0.0523976	0	NA	NA	9	0.0147515	0.033171	0	NA	NA	9	-0.00120978	0.0272725	0	0.0412591	0.0189747	0	134.676
2010-02-02 16:30:00	NA	NA	9	NA	NA	9	910.93	0.308883	0	NA	NA	9	NA	NA	9	2.80531	0.0188264	0	NA	NA	9	NA	NA	9	3.83071	0.00316635	0	NA	NA	9	42.9448	0.0441432	0	NA	NA	9	0.0445973	0.00858269	0	NA	NA	9	0.0348448	0.0212174	0	0.0588297	0.0163045	0	56.1035
2010-02-02 17:30:00	NA	NA	9	NA	NA	9	911.136	0.291039	0	NA	NA	9	NA	NA	9	2.785	0.0171739	0	NA	NA	9	NA	NA	9	3.83002	0.00395197	0	NA	NA	9	42.9629	0.0518534	0	NA	NA	9	0.0388052	0.0135835	0	NA	NA	9	0.0146079	0.0154223	0	0.0442367	0.0135856	0	71.8133
2010-02-02 18:30:00	NA	NA	9	NA	NA	9	911.571	0.386284	0	NA	NA	9	NA	NA	9	2.81445	0.01232	0	NA	NA	9	NA	NA	9	3.83463	0.00435775	0	NA	NA	9	42.9815	0.0579352	0	NA	NA	9	0.0291595	0.0218976	0	NA	NA	9	-0.00256307	0.00944103	0	0.0326717	0.0189189	0	113.694
2010-02-02 19:30:00	NA	NA	9	NA	NA	9	912.061	0.348943	0	NA	NA	9	NA	NA	9	2.81121	0.0107857	0	NA	NA	9	NA	NA	9	3.83543	0.00455229	0	NA	NA	9	42.9955	0.0567145	0	NA	NA	9	0.000832039	0.00739658	0	NA	NA	9	-0.0095486	0.00874819	0	0.0136394	0.00608462	0	154.492
2010-02-02 20:30:00	NA	NA	9	NA	NA	9	912.735	0.355499	0	NA	NA	9	NA	NA	9	2.81506	0.0120955	0	NA	NA	9	NA	NA	9	3.8344	0.00432267	0	NA	NA	9	42.977	0.0543895	0	NA	NA	9	0.00302862	0.00631833	0	NA	NA	9	-0.0271716	0.0136859	0	0.0282279	0.013336	0	165.134
2010-02-02 21:30:00	NA	NA	9	NA	NA	9	913.203	0.337062	0	NA	NA	9	NA	NA	9	2.82039	0.0126354	0	NA	NA	9	NA	NA	9	3.83424	0.0040733	0	NA	NA	9	42.9677	0.0507639	0	NA	NA	9	-0.0127922	0.0116433	0	NA	NA	9	-0.0459825	0.0136441	0	0.0486231	0.0153464	0	192.349
2010-02-02 22:30:00	NA	NA	9	NA	NA	9	913.34	0.312934	0	NA	NA	9	NA	NA	9	2.84996	0.011086	0	NA	NA	9	NA	NA	9	3.8372	0.00405366	0	NA	NA	9	42.9655	0.0535599	0	NA	NA	9	-0.0179115	0.00946444	0	NA	NA	9	-0.0275406	0.0147759	0	0.033779	0.0156893	0	213.904
2010-02-02 23:30:00	NA	NA	9	NA	NA	9	913.166	0.362185	0	NA	NA	9	NA	NA	9	2.88106	0.015746	0	NA	NA	9	NA	NA	9	3.83836	0.00417866	0	NA	NA	9	42.9388	0.0512141	0	NA	NA	9	-0.00736888	0.0192217	0	NA	NA	9	-0.0475595	0.0164328	0	0.0511168	0.01851	0	184.283
2010-02-03 00:30:00	NA	NA	9	NA	NA	9	912.641	0.372978	0	NA	NA	9	NA	NA	9	2.92652	0.0112387	0	NA	NA	9	NA	NA	9	3.84305	0.00432038	0	NA	NA	9	42.9376	0.0552695	0	NA	NA	9	-0.00371055	0.0153425	0	NA	NA	9	-0.0368402	0.0183009	0	0.0395034	0.0195104	0	179.462
2010-02-03 01:30:00	NA	NA	9	NA	NA	9	911.796	0.368975	0	NA	NA	9	NA	NA	9	2.97212	0.0252727	0	NA	NA	9	NA	NA	9	3.84694	0.00527728	0	NA	NA	9	42.9265	0.055961	0	NA	NA	9	0.00990905	0.0100057	0	NA	NA	9	-0.0136437	0.0201072	0	0.0266739	0.00877591	0	153.01
2010-02-03 02:30:00	NA	NA	9	NA	NA	9	911.226	0.370549	0	NA	NA	9	NA	NA	9	2.92226	0.0183974	0	NA	NA	9	NA	NA	9	3.84343	0.00457804	0	NA	NA	9	42.949	0.0553804	0	NA	NA	9	0.00684291	0.0134612	0	NA	NA	9	0.018038	0.00693675	0	0.0236105	0.00663021	0	146.638
2010-02-03 03:30:00	NA	NA	9	NA	NA	9	910.678	0.359906	0	NA	NA	9	NA	NA	9	2.90402	0.0140447	0	NA	NA	9	NA	NA	9	3.84223	0.00466892	0	NA	NA	9	42.9585	0.0600933	0	NA	NA	9	0.0188654	0.00918713	0	NA	NA	9	0.00606697	0.00606686	0	0.0205807	0.00950472	0	73.3421
2010-02-03 04:30:00	NA	NA	9	NA	NA	9	910.341	0.322665	0	NA	NA	9	NA	NA	9	2.8964	0.0107131	0	NA	NA	9	NA	NA	9	3.84112	0.00400345	0	NA	NA	9	42.9549	0.0521457	0	NA	NA	9	0.00509669	0.0130009	0	NA	NA	9	-0.00823	0.00610582	0	0.0151114	0.00846079	0	163.236
2010-02-03 05:30:00	NA	NA	9	NA	NA	9	910.496	0.331843	0	NA	NA	9	NA	NA	9	2.88524	0.0127684	0	NA	NA	9	NA	NA	9	3.83747	0.00397282	0	NA	NA	9	42.9237	0.0502769	0	NA	NA	9	0.0390473	0.0185287	0	NA	NA	9	-0.00472992	0.00970453	0	0.0407382	0.0180246	0	101.24
2010-02-03 06:30:00	NA	NA	9	NA	NA	9	911.089	0.351158	0	NA	NA	9	NA	NA	9	2.82388	0.0269821	0	NA	NA	9	NA	NA	9	3.83313	0.00413515	0	NA	NA	9	42.9503	0.0449607	0	NA	NA	9	0.0662339	0.0211873	0	NA	NA	9	0.0216708	0.0195964	0	0.0725603	0.0205973	0	71.8685
2010-02-03 07:30:00	NA	NA	9	NA	NA	9	911.927	0.367681	0	NA	NA	9	NA	NA	9	2.74536	0.0178962	0	NA	NA	9	NA	NA	9	3.82782	0.00431613	0	NA	NA	9	42.9875	0.0549983	0	NA	NA	9	0.0350009	0.0159704	0	NA	NA	9	-0.0141491	0.00680685	0	0.039095	0.0140771	0	115.772
2010-02-03 08:30:00	NA	NA	9	NA	NA	9	912.675	0.39828	0	NA	NA	9	NA	NA	9	2.73892	0.0115403	0	NA	NA	9	NA	NA	9	3.82785	0.00457361	0	NA	NA	9	42.996	0.0597055	0	NA	NA	9	-0.00993426	0.0231744	0	NA	NA	9	-0.0263361	0.00937388	0	0.0344709	0.0151242	0	189.884
2010-02-03 09:30:00	NA	NA	9	NA	NA	9	913.426	0.394187	0	NA	NA	9	NA	NA	9	2.72526	0.0270207	0	NA	NA	9	NA	NA	9	3.82313	0.00366553	0	NA	NA	9	42.9542	0.042241	0	NA	NA	9	-0.0874122	0.0375968	0	NA	NA	9	-0.047634	0.0214229	0	0.102777	0.0349117	0	238.88
2010-02-03 10:30:00	NA	NA	9	NA	NA	9	913.68	0.287969	0	NA	NA	9	NA	NA	9	2.7991	0.0446787	0	NA	NA	9	NA	NA	9	3.82983	0.00479477	0	NA	NA	9	42.9401	0.0469191	0	NA	NA	9	-0.122441	0.0437557	0	NA	NA	9	-0.0343076	0.0241692	0	0.129996	0.0420491	0	252.966
2010-02-03 11:30:00	NA	NA	9	NA	NA	9	913.716	0.309566	0	NA	NA	9	NA	NA	9	2.83397	0.0241463	0	NA	NA	9	NA	NA	9	3.83333	0.00326576	0	NA	NA	9	42.9378	0.0450559	0	NA	NA	9	-0.0352943	0.0269952	0	NA	NA	9	-0.0634714	0.0166601	0	0.0771904	0.0179408	0	207.229
2010-02-03 12:30:00	NA	NA	9	NA	NA	9	913.378	0.361362	0	NA	NA	9	NA	NA	9	2.85401	0.0206164	0	NA	NA	9	NA	NA	9	3.83704	0.00396288	0	NA	NA	9	42.9581	0.0523666	0	NA	NA	9	-0.0259791	0.00853043	0	NA	NA	9	-0.0393624	0.0140623	0	0.048356	0.0125083	0	214.592
2010-02-03 13:30:00	NA	NA	9	NA	NA	9	912.753	0.374866	0	NA	NA	9	NA	NA	9	2.85903	0.0133578	0	NA	NA	9	NA	NA	9	3.83657	0.00363375	0	NA	NA	9	42.9459	0.0488665	0	NA	NA	9	0.00278766	0.00969385	0	NA	NA	9	-0.0352272	0.00877462	0	0.0365945	0.00897132	0	174.75
2010-02-03 14:30:00	NA	NA	9	NA	NA	9	911.929	0.412037	0	NA	NA	9	NA	NA	9	2.89008	0.0294322	0	NA	NA	9	NA	NA	9	3.83913	0.00422137	0	NA	NA	9	42.9373	0.046926	0	NA	NA	9	-0.0003474	0.00895079	0	NA	NA	9	-0.0353836	0.00989284	0	0.0365115	0.00984766	0	179.673
2010-02-03 15:30:00	NA	NA	9	NA	NA	9	911.308	0.348936	0	NA	NA	9	NA	NA	9	2.88391	0.0507708	0	NA	NA	9	NA	NA	9	3.83823	0.00684125	0	NA	NA	9	42.9345	0.0525451	0	NA	NA	9	-0.0331969	0.0356836	0	NA	NA	9	-0.0178615	0.0221311	0	0.045336	0.0335926	0	226.458
2010-02-03 16:30:00	NA	NA	9	NA	NA	9	911.098	0.323982	0	NA	NA	9	NA	NA	9	2.76256	0.019648	0	NA	NA	9	NA	NA	9	3.82597	0.00343042	0	NA	NA	9	42.9418	0.0425586	0	NA	NA	9	-0.0791402	0.0323491	0	NA	NA	9	-0.00744376	0.0178269	0	0.0819255	0.0311582	0	262.418
2010-02-03 17:30:00	NA	NA	9	NA	NA	9	910.927	0.311452	0	NA	NA	9	NA	NA	9	2.79407	0.011775	0	NA	NA	9	NA	NA	9	3.8292	0.00316309	0	NA	NA	9	42.9407	0.0424405	0	NA	NA	9	-0.0737572	0.0273432	0	NA	NA	9	-0.0317863	0.0187861	0	0.0829595	0.025856	0	244.93
2010-02-03 18:30:00	NA	NA	9	NA	NA	9	911.014	0.304436	0	NA	NA	9	NA	NA	9	2.80597	0.0131676	0	NA	NA	9	NA	NA	9	3.83036	0.00349687	0	NA	NA	9	42.9394	0.043375	0	NA	NA	9	-0.0660681	0.0251351	0	NA	NA	9	-0.0275079	0.0177403	0	0.074069	0.0241194	0	245.998
2010-02-03 19:30:00	NA	NA	9	NA	NA	9	911.378	0.357873	0	NA	NA	9	NA	NA	9	2.85891	0.0315741	0	NA	NA	9	NA	NA	9	3.83528	0.00440729	0	NA	NA	9	42.9306	0.0442386	0	NA	NA	9	-0.0486509	0.0174113	0	NA	NA	9	-0.00908668	0.0133828	0	0.0516749	0.0161651	0	257.474
2010-02-03 20:30:00	NA	NA	9	NA	NA	9	911.854	0.365983	0	NA	NA	9	NA	NA	9	2.88114	0.0125814	0	NA	NA	9	NA	NA	9	3.83947	0.00426811	0	NA	NA	9	42.9534	0.0556231	0	NA	NA	9	-0.0239132	0.0126765	0	NA	NA	9	-0.0325439	0.014449	0	0.0432576	0.0113604	0	216.976
2010-02-03 21:30:00	NA	NA	9	NA	NA	9	912.244	0.34314	0	NA	NA	9	NA	NA	9	2.91176	0.0181717	0	NA	NA	9	NA	NA	9	3.84429	0.00474796	0	NA	NA	9	42.9731	0.0561818	0	NA	NA	9	0.00656789	0.0139581	0	NA	NA	9	-0.00988828	0.0095827	0	0.0195085	0.00684523	0	150.826
2010-02-03 22:30:00	NA	NA	9	NA	NA	9	912.993	0.403361	0	NA	NA	9	NA	NA	9	2.77726	0.0885565	0	NA	NA	9	NA	NA	9	3.82824	0.00942798	0	NA	NA	9	42.9497	0.0503411	0	NA	NA	9	-0.0375312	0.0591169	0	NA	NA	9	0.000351647	0.0187588	0	0.0630641	0.0357339	0	199.29
2010-02-03 23:30:00	NA	NA	9	NA	NA	9	913.171	0.293948	0	NA	NA	9	NA	NA	9	2.77495	0.0286649	0	NA	NA	9	NA	NA	9	3.82839	0.00463808	0	NA	NA	9	42.9545	0.0423407	0	NA	NA	9	-0.0506344	0.0259402	0	NA	NA	9	-0.013261	0.0130958	0	0.0548746	0.0239316	0	251.027
2010-02-04 00:30:00	NA	NA	9	NA	NA	9	912.919	0.307257	0	NA	NA	9	NA	NA	9	2.80833	0.0132786	0	NA	NA	9	NA	NA	9	3.83242	0.00403634	0	NA	NA	9	42.961	0.0521069	0	NA	NA	9	-0.0223905	0.0113217	0	NA	NA	9	-0.0272872	0.00868258	0	0.0365026	0.0108169	0	217.887
2010-02-04 01:30:00	NA	NA	9	NA	NA	9	912.481	0.351235	0	NA	NA	9	NA	NA	9	2.82785	0.0245762	0	NA	NA	9	NA	NA	9	3.83549	0.00513233	0	NA	NA	9	42.974	0.0532003	0	NA	NA	9	-0.0174158	0.00975032	0	NA	NA	9	-0.0109175	0.00950461	0	0.0217373	0.0116349	0	241.91
2010-02-04 02:30:00	NA	NA	9	NA	NA	9	911.798	0.384801	0	NA	NA	9	NA	NA	9	2.91886	0.0324673	0	NA	NA	9	NA	NA	9	3.84367	0.00521497	0	NA	NA	9	42.9561	0.051925	0	NA	NA	9	0.00258795	0.0124153	0	NA	NA	9	0.00057474	0.00907607	0	0.0125775	0.00923399	0	208.829
2010-02-04 03:30:00	NA	NA	9	NA	NA	9	911.212	0.343943	0	NA	NA	9	NA	NA	9	2.87406	0.0141699	0	NA	NA	9	NA	NA	9	3.83883	0.00402301	0	NA	NA	9	42.9552	0.0501183	0	NA	NA	9	0.00772798	0.0124626	0	NA	NA	9	-0.0298569	0.0113193	0	0.0333356	0.0111016	0	163.832
2010-02-04 04:30:00	NA	NA	9	NA	NA	9	910.796	0.333955	0	NA	NA	9	NA	NA	9	2.90398	0.0158635	0	NA	NA	9	NA	NA	9	3.8422	0.00441917	0	NA	NA	9	42.9581	0.053589	0	NA	NA	9	0.0113867	0.00893883	0	NA	NA	9	-0.0216303	0.00469271	0	0.025823	0.00570843	0	154.767
2010-02-04 05:30:00	NA	NA	9	NA	NA	9	910.912	0.314959	0	NA	NA	9	NA	NA	9	2.82505	0.0242233	0	NA	NA	9	NA	NA	9	3.83384	0.00418245	0	NA	NA	9	42.9579	0.0495147	0	NA	NA	9	0.0366605	0.0194927	0	NA	NA	9	-0.00686723	0.0254873	0	0.0472999	0.0135266	0	108.317
2010-02-04 06:30:00	NA	NA	9	NA	NA	9	911.076	0.294355	0	NA	NA	9	NA	NA	9	2.81664	0.0109516	0	NA	NA	9	NA	NA	9	3.83383	0.00377049	0	NA	NA	9	42.9688	0.0502757	0	NA	NA	9	-0.0260486	0.0200672	0	NA	NA	9	-0.0463377	0.0130875	0	0.0555691	0.0176529	0	207.37
2010-02-04 07:30:00	NA	NA	9	NA	NA	9	911.617	0.345087	0	NA	NA	9	NA	NA	9	2.80097	0.0198398	0	NA	NA	9	NA	NA	9	3.83032	0.00362978	0	NA	NA	9	42.9451	0.0402125	0	NA	NA	9	-0.057452	0.0243589	0	NA	NA	9	-0.0298943	0.0142235	0	0.0669734	0.0224605	0	239.896
2010-02-04 08:30:00	NA	NA	9	NA	NA	9	912.074	0.363398	0	NA	NA	9	NA	NA	9	2.90111	0.0326851	0	NA	NA	9	NA	NA	9	3.83799	0.00435936	0	NA	NA	9	42.9082	0.0436738	0	NA	NA	9	-0.0599834	0.0268353	0	NA	NA	9	-0.048077	0.0366975	0	0.0823547	0.0345465	0	233.425
2010-02-04 09:30:00	NA	NA	9	NA	NA	9	912.689	0.305685	0	NA	NA	9	NA	NA	9	2.88563	0.0333299	0	NA	NA	9	NA	NA	9	3.83904	0.00488275	0	NA	NA	9	42.9415	0.0543606	0	NA	NA	9	-0.0411769	0.0230831	0	NA	NA	9	-0.0686054	0.0183714	0	0.0820984	0.0230705	0	208.643
2010-02-04 10:30:00	NA	NA	9	NA	NA	9	913.096	0.337644	0	NA	NA	9	NA	NA	9	2.93127	0.0119363	0	NA	NA	9	NA	NA	9	3.84225	0.00401935	0	NA	NA	9	42.921	0.0544032	0	NA	NA	9	-0.0508294	0.0144857	0	NA	NA	9	-0.0536464	0.0233248	0	0.0757405	0.0218789	0	225.077
2010-02-04 11:30:00	NA	NA	9	NA	NA	9	913.264	0.305944	0	NA	NA	9	NA	NA	9	2.96037	0.0140901	0	NA	NA	9	NA	NA	9	3.84397	0.0041471	0	NA	NA	9	42.9039	0.0551395	0	NA	NA	9	-0.0195193	0.016379	0	NA	NA	9	-0.0391104	0.0208298	0	0.0476891	0.0183935	0	206.659
2010-02-04 12:30:00	NA	NA	9	NA	NA	9	913.222	0.322639	0	NA	NA	9	NA	NA	9	2.96538	0.0118153	0	NA	NA	9	NA	NA	9	3.84592	0.00442854	0	NA	NA	9	42.9216	0.0558215	0	NA	NA	9	0.00146822	0.0160603	0	NA	NA	9	-0.0351281	0.0186414	0	0.0389602	0.0179866	0	173.981
2010-02-04 13:30:00	NA	NA	9	NA	NA	9	912.766	0.334935	0	NA	NA	9	NA	NA	9	2.98704	0.0140854	0	NA	NA	9	NA	NA	9	3.84843	0.00410685	0	NA	NA	9	42.9248	0.0549456	0	NA	NA	9	-0.00290155	0.00805693	0	NA	NA	9	-0.0109399	0.00843704	0	0.0143688	0.00759554	0	202.096
2010-02-04 14:30:00	NA	NA	9	NA	NA	9	912.31	0.346753	0	NA	NA	9	NA	NA	9	2.96996	0.0166229	0	NA	NA	9	NA	NA	9	3.84413	0.0041697	0	NA	NA	9	42.8938	0.0522139	0	NA	NA	9	0.0258739	0.0226313	0	NA	NA	9	-0.00890659	0.0269259	0	0.0425935	0.013083	0	119.886
2010-02-04 15:30:00	NA	NA	9	NA	NA	9	911.755	0.365942	0	NA	NA	9	NA	NA	9	2.92849	0.0180063	0	NA	NA	9	NA	NA	9	3.84208	0.00443982	0	NA	NA	9	42.9234	0.0553746	0	NA	NA	9	0.0439037	0.0123924	0	NA	NA	9	0.00586453	0.0119626	0	0.045737	0.0129095	0	84.8759
2010-02-04 16:30:00	NA	NA	9	NA	NA	9	911.347	0.372846	0	NA	NA	9	NA	NA	9	2.85944	0.0222889	0	NA	NA	9	NA	NA	9	3.83779	0.00439011	0	NA	NA	9	42.9615	0.0534448	0	NA	NA	9	0.0364632	0.011946	0	NA	NA	9	-0.00161387	0.010868	0	0.038161	0.0116902	0	95.9507
2010-02-04 17:30:00	NA	NA	9	NA	NA	9	910.891	0.325564	0	NA	NA	9	NA	NA	9	2.87855	0.0121944	0	NA	NA	9	NA	NA	9	3.83977	0.00456709	0	NA	NA	9	42.9613	0.0587709	0	NA	NA	9	0.00366782	0.0160829	0	NA	NA	9	-0.0211161	0.0136479	0	0.0277868	0.0114886	0	156.333
2010-02-04 18:30:00	NA	NA	9	NA	NA	9	910.824	0.289561	0	NA	NA	9	NA	NA	9	2.91451	0.032672	0	NA	NA	9	NA	NA	9	3.84395	0.00562363	0	NA	NA	9	42.966	0.0572161	0	NA	NA	9	-0.0112677	0.0103543	0	NA	NA	9	-0.0103291	0.012273	0	0.0173225	0.0138341	0	228.422
2010-02-04 19:30:00	NA	NA	9	NA	NA	9	910.752	0.341281	0	NA	NA	9	NA	NA	9	2.96203	0.0274211	0	NA	NA	9	NA	NA	9	3.84613	0.00464119	0	NA	NA	9	42.9303	0.053914	0	NA	NA	9	0.0164445	0.00915446	0	NA	NA	9	-0.00840782	0.00877027	0	0.0198761	0.0103317	0	116.985
2010-02-04 20:30:00	NA	NA	9	NA	NA	9	911.208	0.326015	0	NA	NA	9	NA	NA	9	2.94544	0.0217149	0	NA	NA	9	NA	NA	9	3.84311	0.00408034	0	NA	NA	9	42.9143	0.0569688	0	NA	NA	9	0.0120498	0.0120395	0	NA	NA	9	-0.0228197	0.013204	0	0.0295355	0.0106193	0	148.1
2010-02-04 21:30:00	NA	NA	9	NA	NA	9	911.818	0.354628	0	NA	NA	9	NA	NA	9	2.89318	0.0314767	0	NA	NA	9	NA	NA	9	3.83631	0.00403015	0	NA	NA	9	42.8978	0.0460667	0	NA	NA	9	-0.0316179	0.0219936	0	NA	NA	9	-0.0441207	0.0188631	0	0.0576903	0.0213891	0	214.309
2010-02-04 22:30:00	NA	NA	9	NA	NA	9	912.35	0.334724	0	NA	NA	9	NA	NA	9	2.87622	0.0125935	0	NA	NA	9	NA	NA	9	3.83601	0.00333016	0	NA	NA	9	42.9163	0.0431715	0	NA	NA	9	-0.019757	0.0325898	0	NA	NA	9	-0.0818969	0.0265031	0	0.0905719	0.0256531	0	191.106
2010-02-04 23:30:00	NA	NA	9	NA	NA	9	912.558	0.322042	0	NA	NA	9	NA	NA	9	2.9562	0.0529917	0	NA	NA	9	NA	NA	9	3.84397	0.00568191	0	NA	NA	9	42.9098	0.0540525	0	NA	NA	9	-0.0151961	0.0107559	0	NA	NA	9	-0.0616088	0.0350662	0	0.0655439	0.0327985	0	199.453
2010-02-05 00:30:00	NA	NA	9	NA	NA	9	912.525	0.313713	0	NA	NA	9	NA	NA	9	2.98434	0.0272148	0	NA	NA	9	NA	NA	9	3.84679	0.00451816	0	NA	NA	9	42.9079	0.049277	0	NA	NA	9	0.00357732	0.0177258	0	NA	NA	9	-0.00508718	0.0202182	0	0.0251969	0.0112447	0	148.572
2010-02-05 01:30:00	NA	NA	9	NA	NA	9	912.407	0.331539	0	NA	NA	9	NA	NA	9	2.98903	0.0136076	0	NA	NA	9	NA	NA	9	3.84711	0.00455188	0	NA	NA	9	42.9058	0.0605219	0	NA	NA	9	0.0179433	0.0107464	0	NA	NA	9	0.00558381	0.0126108	0	0.0220841	0.0118268	0	84.3301
2010-02-05 02:30:00	NA	NA	9	NA	NA	9	912.207	0.292556	0	NA	NA	9	NA	NA	9	2.94178	0.040432	0	NA	NA	9	NA	NA	9	3.8423	0.00543301	0	NA	NA	9	42.9083	0.0615007	0	NA	NA	9	0.0368793	0.0137219	0	NA	NA	9	0.00447999	0.00970578	0	0.0383252	0.0139206	0	84.6563
2010-02-05 03:30:00	NA	NA	9	NA	NA	9	911.821	0.304447	0	NA	NA	9	NA	NA	9	2.89738	0.0120593	0	NA	NA	9	NA	NA	9	3.84088	0.00405672	0	NA	NA	9	42.9496	0.0519201	0	NA	NA	9	0.0163133	0.0149279	0	NA	NA	9	-0.0253847	0.0215214	0	0.0374472	0.0139268	0	139.069
2010-02-05 04:30:00	NA	NA	9	NA	NA	9	911.451	0.340241	0	NA	NA	9	NA	NA	9	2.90665	0.0347907	0	NA	NA	9	NA	NA	9	3.84183	0.00514211	0	NA	NA	9	42.9495	0.057929	0	NA	NA	9	0.00796321	0.012287	0	NA	NA	9	-0.00881594	0.0210435	0	0.0230496	0.0142629	0	140.794
2010-02-05 05:30:00	NA	NA	9	NA	NA	9	911.316	0.295472	0	NA	NA	9	NA	NA	9	2.85336	0.0279634	0	NA	NA	9	NA	NA	9	3.83768	0.00489366	0	NA	NA	9	42.9683	0.0612752	0	NA	NA	9	-0.0060475	0.0149517	0	NA	NA	9	-0.00890207	0.0222474	0	0.0232554	0.0171252	0	225.417
2010-02-05 06:30:00	NA	NA	9	NA	NA	9	911.373	0.489445	0	NA	NA	9	NA	NA	9	2.90994	0.0175484	0	NA	NA	9	NA	NA	9	3.8398	0.00421528	0	NA	NA	9	42.9197	0.0511716	0	NA	NA	9	-0.00370675	0.0146186	0	NA	NA	9	-0.0758661	0.0215187	0	0.0774547	0.0211376	0	181.766
2010-02-05 07:30:00	NA	NA	9	NA	NA	9	911.431	0.340371	0	NA	NA	9	NA	NA	9	2.93206	0.0121916	0	NA	NA	9	NA	NA	9	3.84225	0.00393464	0	NA	NA	9	42.921	0.0519727	0	NA	NA	9	-0.00585619	0.011708	0	NA	NA	9	-0.0496591	0.0252865	0	0.0515317	0.0249239	0	185.722
2010-02-05 08:30:00	NA	NA	9	NA	NA	9	911.838	0.356786	0	NA	NA	9	NA	NA	9	2.94586	0.0266166	0	NA	NA	9	NA	NA	9	3.8432	0.00418588	0	NA	NA	9	42.9144	0.0515973	0	NA	NA	9	-0.00465797	0.0129213	0	NA	NA	9	-0.0417876	0.017223	0	0.0440205	0.0171347	0	187.511
2010-02-05 09:30:00	NA	NA	9	NA	NA	9	912.518	0.404249	0	NA	NA	9	NA	NA	9	2.88229	0.0375276	0	NA	NA	9	NA	NA	9	3.83622	0.00411077	0	NA	NA	9	42.9107	0.0451948	0	NA	NA	9	-0.0292872	0.021774	0	NA	NA	9	-0.0607887	0.0358687	0	0.0705878	0.0364801	0	205.797
2010-02-05 10:30:00	NA	NA	9	NA	NA	9	913.044	0.319892	0	NA	NA	9	NA	NA	9	2.85316	0.0180622	0	NA	NA	9	NA	NA	9	3.83487	0.0037253	0	NA	NA	9	42.9321	0.0485857	0	NA	NA	9	-0.0327308	0.0238845	0	NA	NA	9	-0.0314289	0.0302214	0	0.0528523	0.02737	0	224.529
2010-02-05 11:30:00	NA	NA	9	NA	NA	9	913.367	0.319828	0	NA	NA	9	NA	NA	9	2.89127	0.023384	0	NA	NA	9	NA	NA	9	3.83756	0.00339095	0	NA	NA	9	42.915	0.0418357	0	NA	NA	9	-0.00864051	0.0291466	0	NA	NA	9	-0.0645118	0.0366397	0	0.073798	0.0313305	0	193.194
2010-02-05 12:30:00	NA	NA	9	NA	NA	9	913.558	0.308081	0	NA	NA	9	NA	NA	9	2.90898	0.0191439	0	NA	NA	9	NA	NA	9	3.8374	0.00348947	0	NA	NA	9	42.8895	0.0418374	0	NA	NA	9	0.0205689	0.0179879	0	NA	NA	9	-0.0625927	0.0214722	0	0.0679106	0.0226617	0	162.521
2010-02-05 13:30:00	NA	NA	9	NA	NA	9	913.372	0.304755	0	NA	NA	9	NA	NA	9	2.94394	0.0191186	0	NA	NA	9	NA	NA	9	3.84252	0.00449602	0	NA	NA	9	42.9074	0.0548302	0	NA	NA	9	0.02333	0.0155803	0	NA	NA	9	-0.0290829	0.021513	0	0.0412105	0.0199294	0	136.318
2010-02-05 14:30:00	NA	NA	9	NA	NA	9	912.981	0.381339	0	NA	NA	9	NA	NA	9	2.95169	0.0137609	0	NA	NA	9	NA	NA	9	3.84287	0.00411189	0	NA	NA	9	42.9017	0.0529311	0	NA	NA	9	0.0212903	0.00602209	0	NA	NA	9	-0.0311081	0.0163826	0	0.0395557	0.012685	0	140.563
2010-02-05 15:30:00	NA	NA	9	NA	NA	9	912.345	0.338086	0	NA	NA	9	NA	NA	9	2.96559	0.0165336	0	NA	NA	9	NA	NA	9	3.84375	0.00419493	0	NA	NA	9	42.8948	0.0569683	0	NA	NA	9	0.0166402	0.00545229	0	NA	NA	9	-0.0212421	0.0109628	0	0.028601	0.00774379	0	138.119
2010-02-05 16:30:00	NA	NA	9	NA	NA	9	911.845	0.366014	0	NA	NA	9	NA	NA	9	2.99335	0.0284166	0	NA	NA	9	NA	NA	9	3.84525	0.00515095	0	NA	NA	9	42.8771	0.0541767	0	NA	NA	9	0.0258908	0.0155124	0	NA	NA	9	-0.0182299	0.0158812	0	0.0352602	0.0158776	0	126.083
2010-02-05 17:30:00	NA	NA	9	NA	NA	9	911.507	0.313662	0	NA	NA	9	NA	NA	9	2.88733	0.0503509	0	NA	NA	9	NA	NA	9	3.83477	0.00416954	0	NA	NA	9	42.8865	0.0508935	0	NA	NA	9	0.0244116	0.0196705	0	NA	NA	9	0.0516001	0.0413568	0	0.0640854	0.0353327	0	73.3932
2010-02-05 18:30:00	NA	NA	9	NA	NA	9	911.15	0.338679	0	NA	NA	9	NA	NA	9	2.84094	0.0164089	0	NA	NA	9	NA	NA	9	3.83402	0.00413303	0	NA	NA	9	42.9388	0.0536129	0	NA	NA	9	0.0188502	0.0119956	0	NA	NA	9	-0.0111514	0.0163975	0	0.0248945	0.0165119	0	120.913
2010-02-05 19:30:00	NA	NA	9	NA	NA	9	910.893	0.329263	0	NA	NA	9	NA	NA	9	2.87031	0.0230225	0	NA	NA	9	NA	NA	9	3.83707	0.00452559	0	NA	NA	9	42.9383	0.0543658	0	NA	NA	9	0.022518	0.00734046	0	NA	NA	9	-0.00822029	0.011794	0	0.0254606	0.010924	0	105.623
2010-02-05 20:30:00	NA	NA	9	NA	NA	9	911.009	0.319114	0	NA	NA	9	NA	NA	9	2.89798	0.0114773	0	NA	NA	9	NA	NA	9	3.83955	0.00433066	0	NA	NA	9	42.9326	0.0554886	0	NA	NA	9	0.00953456	0.006261	0	NA	NA	9	-0.0200146	0.00694606	0	0.0231327	0.00661781	0	158.185
2010-02-05 21:30:00	NA	NA	9	NA	NA	9	911.211	0.285272	0	NA	NA	9	NA	NA	9	2.96938	0.0171158	0	NA	NA	9	NA	NA	9	3.84437	0.00449682	0	NA	NA	9	42.8983	0.0537902	0	NA	NA	9	-0.00553824	0.0105236	0	NA	NA	9	0.00420145	0.00832096	0	0.0132417	0.00727286	0	227.223
2010-02-05 22:30:00	NA	NA	9	NA	NA	9	911.569	0.349145	0	NA	NA	9	NA	NA	9	2.93559	0.016817	0	NA	NA	9	NA	NA	9	3.8411	0.00384866	0	NA	NA	9	42.9018	0.0512541	0	NA	NA	9	0.0226947	0.00623004	0	NA	NA	9	-0.00918201	0.00992051	0	0.0267836	0.00437715	0	112.237
2010-02-05 23:30:00	NA	NA	9	NA	NA	9	911.804	0.328171	0	NA	NA	9	NA	NA	9	2.94978	0.0160964	0	NA	NA	9	NA	NA	9	3.84236	0.00432889	0	NA	NA	9	42.8986	0.0556897	0	NA	NA	9	0.0241237	0.00541873	0	NA	NA	9	-0.00300111	0.00762035	0	0.0256417	0.00456745	0	99.1701
2010-02-06 00:30:00	NA	NA	9	NA	NA	9	912.317	0.354838	0	NA	NA	9	NA	NA	9	2.92442	0.0257666	0	NA	NA	9	NA	NA	9	3.84089	0.00490058	0	NA	NA	9	42.9136	0.0613104	0	NA	NA	9	0.00122229	0.0167303	0	NA	NA	9	0.0210828	0.0140065	0	0.0290047	0.00897607	0	217.621
2010-02-06 01:30:00	NA	NA	9	NA	NA	9	912.396	0.31311	0	NA	NA	9	NA	NA	9	2.93387	0.0136279	0	NA	NA	9	NA	NA	9	3.8426	0.00470144	0	NA	NA	9	42.9224	0.0600419	0	NA	NA	9	0.00252143	0.0108601	0	NA	NA	9	0.00780112	0.00665312	0	0.0127671	0.00814668	0	220.585
2010-02-06 02:30:00	NA	NA	9	NA	NA	9	912.428	0.307338	0	NA	NA	9	NA	NA	9	2.87148	0.0127504	0	NA	NA	9	NA	NA	9	3.83401	0.00366652	0	NA	NA	9	42.8973	0.0477233	0	NA	NA	9	0.0234297	0.00563291	0	NA	NA	9	0.00367701	0.00737749	0	0.0247526	0.00599242	0	82.3998
2010-02-06 03:30:00	NA	NA	9	NA	NA	9	912.388	0.299106	0	NA	NA	9	NA	NA	9	2.82715	0.0161717	0	NA	NA	9	NA	NA	9	3.83299	0.00390713	0	NA	NA	9	42.9434	0.0559391	0	NA	NA	9	0.0169017	0.00686958	0	NA	NA	9	-0.00496462	0.0159069	0	0.0228692	0.0093496	0	98.2867
2010-02-06 04:30:00	NA	NA	9	NA	NA	9	911.953	0.323338	0	NA	NA	9	NA	NA	9	2.83657	0.0125634	0	NA	NA	9	NA	NA	9	3.83576	0.00442802	0	NA	NA	9	42.9661	0.0572499	0	NA	NA	9	0.0231328	0.00492267	0	NA	NA	9	-0.00404969	0.00611096	0	0.02414	0.00550893	0	99.3749
2010-02-06 05:30:00	NA	NA	9	NA	NA	9	911.756	0.315561	0	NA	NA	9	NA	NA	9	2.83683	0.0114823	0	NA	NA	9	NA	NA	9	3.83558	0.00449833	0	NA	NA	9	42.9635	0.0570584	0	NA	NA	9	0.0119315	0.0055525	0	NA	NA	9	-0.00891629	0.00586725	0	0.0155291	0.0067788	0	124.231
2010-02-06 06:30:00	NA	NA	9	NA	NA	9	911.78	0.316143	0	NA	NA	9	NA	NA	9	2.80202	0.0406491	0	NA	NA	9	NA	NA	9	3.82991	0.00565581	0	NA	NA	9	42.9384	0.0551614	0	NA	NA	9	0.010755	0.00626818	0	NA	NA	9	0.0277066	0.0173184	0	0.0326011	0.0126336	0	53.872
2010-02-06 07:30:00	NA	NA	9	NA	NA	9	911.922	0.304075	0	NA	NA	9	NA	NA	9	2.75652	0.0142172	0	NA	NA	9	NA	NA	9	3.82883	0.00432233	0	NA	NA	9	42.9853	0.0569387	0	NA	NA	9	0.00856943	0.00626125	0	NA	NA	9	-0.00743486	0.0159421	0	0.0171471	0.0113115	0	111.085
2010-02-06 08:30:00	NA	NA	9	NA	NA	9	912.118	0.329393	0	NA	NA	9	NA	NA	9	2.76497	0.0209873	0	NA	NA	9	NA	NA	9	3.82675	0.00446905	0	NA	NA	9	42.9479	0.0515154	0	NA	NA	9	0.0104906	0.0229419	0	NA	NA	9	-0.0562979	0.0306358	0	0.0629705	0.0279056	0	161.957
2010-02-06 09:30:00	NA	NA	9	NA	NA	9	912.583	0.32352	0	NA	NA	9	NA	NA	9	2.72404	0.026815	0	NA	NA	9	NA	NA	9	3.82278	0.00380784	0	NA	NA	9	42.952	0.0430925	0	NA	NA	9	-0.0120536	0.0277798	0	NA	NA	9	-0.120399	0.0325723	0	0.124108	0.0327207	0	185.218
2010-02-06 10:30:00	NA	NA	9	NA	NA	9	912.919	0.321784	0	NA	NA	9	NA	NA	9	2.75753	0.0242789	0	NA	NA	9	NA	NA	9	3.8264	0.0037437	0	NA	NA	9	42.9528	0.0441063	0	NA	NA	9	-0.029675	0.038205	0	NA	NA	9	-0.155632	0.0410958	0	0.163617	0.0384607	0	191.319
2010-02-06 11:30:00	NA	NA	9	NA	NA	9	913.15	0.347324	0	NA	NA	9	NA	NA	9	2.84838	0.0401041	0	NA	NA	9	NA	NA	9	3.83337	0.00407598	0	NA	NA	9	42.9195	0.0469349	0	NA	NA	9	-0.0104245	0.0217835	0	NA	NA	9	-0.0855151	0.0222909	0	0.0887529	0.0227062	0	186.459
2010-02-06 12:30:00	NA	NA	9	NA	NA	9	913.306	0.315322	0	NA	NA	9	NA	NA	9	2.89561	0.0191005	0	NA	NA	9	NA	NA	9	3.83827	0.00390833	0	NA	NA	9	42.9183	0.0484685	0	NA	NA	9	0.0217247	0.0119762	0	NA	NA	9	-0.104998	0.0164645	0	0.107865	0.0166187	0	168.463
2010-02-06 13:30:00	NA	NA	9	NA	NA	9	913.247	0.361339	0	NA	NA	9	NA	NA	9	2.97819	0.0503015	0	NA	NA	9	NA	NA	9	3.84551	0.00607776	0	NA	NA	9	42.8995	0.0622704	0	NA	NA	9	0.0133597	0.0103889	0	NA	NA	9	-0.0202028	0.0434474	0	0.0399006	0.0314582	0	125.138
2010-02-06 14:30:00	NA	NA	9	NA	NA	9	913.182	0.2906	0	NA	NA	9	NA	NA	9	2.94664	0.0383829	0	NA	NA	9	NA	NA	9	3.84047	0.00467349	0	NA	NA	9	42.8782	0.0489811	0	NA	NA	9	0.0212752	0.0157433	0	NA	NA	9	0.0375724	0.0320182	0	0.0500955	0.0250484	0	72.753
2010-02-06 15:30:00	NA	NA	9	NA	NA	9	912.995	0.330505	0	NA	NA	9	NA	NA	9	2.85243	0.0451204	0	NA	NA	9	NA	NA	9	3.8338	0.00548481	0	NA	NA	9	42.9196	0.0495703	0	NA	NA	9	0.00784907	0.0190855	0	NA	NA	9	0.0540977	0.0246418	0	0.0586909	0.0226884	0	115.71
2010-02-06 16:30:00	NA	NA	9	NA	NA	9	912.771	0.354546	0	NA	NA	9	NA	NA	9	2.72427	0.022155	0	NA	NA	9	NA	NA	9	3.82555	0.00467449	0	NA	NA	9	42.9865	0.0525938	0	NA	NA	9	-0.00444298	0.0208882	0	NA	NA	9	0.0169968	0.0583977	0	0.0557642	0.0323115	0	234.595
2010-02-06 17:30:00	NA	NA	9	NA	NA	9	912.221	0.321449	0	NA	NA	9	NA	NA	9	2.73979	0.0283944	0	NA	NA	9	NA	NA	9	3.82649	0.0053746	0	NA	NA	9	42.978	0.0535101	0	NA	NA	9	0.0132644	0.0127289	0	NA	NA	9	0.034799	0.0343746	0	0.0484587	0.0195391	0	96.7962
2010-02-06 18:30:00	NA	NA	9	NA	NA	9	911.846	0.338693	0	NA	NA	9	NA	NA	9	2.69723	0.0114455	0	NA	NA	9	NA	NA	9	3.82333	0.00393632	0	NA	NA	9	42.9951	0.0516157	0	NA	NA	9	0.027123	0.00890462	0	NA	NA	9	-0.0119232	0.0163065	0	0.0339169	0.00851492	0	110.307
2010-02-06 19:30:00	NA	NA	9	NA	NA	9	911.43	0.274974	0	NA	NA	9	NA	NA	9	2.69866	0.00925068	0	NA	NA	9	NA	NA	9	3.82587	0.00471447	0	NA	NA	9	43.0255	0.0612309	0	NA	NA	9	0.0217492	0.00440841	0	NA	NA	9	-0.0195596	0.00775718	0	0.0298122	0.00681404	0	130.977
2010-02-06 20:30:00	NA	NA	9	NA	NA	9	911.18	0.307845	0	NA	NA	9	NA	NA	9	2.75814	0.0293377	0	NA	NA	9	NA	NA	9	3.83019	0.00436681	0	NA	NA	9	43.0009	0.0534946	0	NA	NA	9	0.0172322	0.00718961	0	NA	NA	9	-0.00817792	0.0135814	0	0.0228583	0.00879656	0	112.212
2010-02-06 21:30:00	NA	NA	9	NA	NA	9	911.134	0.334891	0	NA	NA	9	NA	NA	9	2.74483	0.0239689	0	NA	NA	9	NA	NA	9	3.82897	0.00542308	0	NA	NA	9	43.0032	0.0610913	0	NA	NA	9	0.0257069	0.00364655	0	NA	NA	9	-0.00938593	0.00752399	0	0.028189	0.00491946	0	108.913
2010-02-06 22:30:00	NA	NA	9	NA	NA	9	911.441	0.303858	0	NA	NA	9	NA	NA	9	2.76605	0.0226952	0	NA	NA	9	NA	NA	9	3.82904	0.00414339	0	NA	NA	9	42.9757	0.0487521	0	NA	NA	9	0.0113367	0.00785249	0	NA	NA	9	-0.0321384	0.00758894	0	0.0349702	0.00759639	0	160.481
2010-02-06 23:30:00	NA	NA	9	NA	NA	9	911.814	0.31238	0	NA	NA	9	NA	NA	9	2.78495	0.0226974	0	NA	NA	9	NA	NA	9	3.82829	0.0033656	0	NA	NA	9	42.9408	0.0419159	0	NA	NA	9	-0.00138234	0.018704	0	NA	NA	9	-0.0675976	0.021287	0	0.0702456	0.0209684	0	179.325
2010-02-07 00:30:00	NA	NA	9	NA	NA	9	912.098	0.356474	0	NA	NA	9	NA	NA	9	2.80571	0.0156409	0	NA	NA	9	NA	NA	9	3.83117	0.00390271	0	NA	NA	9	42.9493	0.0494041	0	NA	NA	9	0.00969096	0.020504	0	NA	NA	9	-0.0499629	0.0581806	0	0.0715977	0.0356082	0	167.694
2010-02-07 01:30:00	NA	NA	9	NA	NA	9	912.496	0.345791	0	NA	NA	9	NA	NA	9	2.68086	0.0286366	0	NA	NA	9	NA	NA	9	3.82155	0.00368604	0	NA	NA	9	42.9941	0.0560122	0	NA	NA	9	0.025712	0.00948057	0	NA	NA	9	0.0141234	0.0143443	0	0.0323337	0.0105189	0	64.5022
2010-02-07 02:30:00	NA	NA	9	NA	NA	9	912.757	0.303491	0	NA	NA	9	NA	NA	9	2.67877	0.0166411	0	NA	NA	9	NA	NA	9	3.82511	0.00428447	0	NA	NA	9	43.0417	0.0531845	0	NA	NA	9	0.0192557	0.00871117	0	NA	NA	9	0.00550666	0.0147692	0	0.0245931	0.00949662	0	76.2196
2010-02-07 03:30:00	NA	NA	9	NA	NA	9	912.734	0.345998	0	NA	NA	9	NA	NA	9	2.69691	0.0200642	0	NA	NA	9	NA	NA	9	3.82495	0.00400654	0	NA	NA	9	43.0154	0.0498062	0	NA	NA	9	0.0265739	0.00817423	0	NA	NA	9	-0.0227913	0.00467938	0	0.0357676	0.0059143	0	131.743
2010-02-07 04:30:00	NA	NA	9	NA	NA	9	912.569	0.289718	0	NA	NA	9	NA	NA	9	2.73078	0.01416	0	NA	NA	9	NA	NA	9	3.82617	0.00400492	0	NA	NA	9	42.9857	0.0528433	0	NA	NA	9	0.0188126	0.0132828	0	NA	NA	9	-0.0434296	0.03471	0	0.0508753	0.0321369	0	147.287
2010-02-07 05:30:00	NA	NA	9	NA	NA	9	912.655	0.34722	0	NA	NA	9	NA	NA	9	2.66885	0.0192135	0	NA	NA	9	NA	NA	9	3.81874	0.00364035	0	NA	NA	9	42.9745	0.04412	0	NA	NA	9	-0.00142489	0.0187396	0	NA	NA	9	-0.12543	0.0300077	0	0.126994	0.0293015	0	180.709
2010-02-07 06:30:00	NA	NA	9	NA	NA	9	912.455	0.320632	0	NA	NA	9	NA	NA	9	2.66461	0.0176987	0	NA	NA	9	NA	NA	9	3.81881	0.00408293	0	NA	NA	9	42.9811	0.0466556	0	NA	NA	9	-0.0114903	0.0243948	0	NA	NA	9	-0.125241	0.0354893	0	0.128207	0.0351359	0	185.584
2010-02-07 07:30:00	NA	NA	9	NA	NA	9	912.324	0.310287	0	NA	NA	9	NA	NA	9	2.6918	0.0225644	0	NA	NA	9	NA	NA	9	3.82302	0.00463394	0	NA	NA	9	42.9982	0.0564878	0	NA	NA	9	0.0048176	0.019242	0	NA	NA	9	-0.0549251	0.0279562	0	0.0584699	0.0278001	0	173.771
2010-02-07 08:30:00	NA	NA	9	NA	NA	9	912.132	0.313097	0	NA	NA	9	NA	NA	9	2.80492	0.053297	0	NA	NA	9	NA	NA	9	3.8318	0.00507055	0	NA	NA	9	42.9582	0.0505284	0	NA	NA	9	0.0283996	0.0150934	0	NA	NA	9	-0.0933799	0.0429204	0	0.0994872	0.0412117	0	158.365
2010-02-07 09:30:00	NA	NA	9	NA	NA	9	912.116	0.32309	0	NA	NA	9	NA	NA	9	2.86899	0.0157573	0	NA	NA	9	NA	NA	9	3.83483	0.00324409	0	NA	NA	9	42.9112	0.0397419	0	NA	NA	9	0.0201976	0.0212587	0	NA	NA	9	-0.0973224	0.0343513	0	0.101672	0.0342652	0	167.814
2010-02-07 10:30:00	NA	NA	9	NA	NA	9	912.611	0.341441	0	NA	NA	9	NA	NA	9	2.75954	0.0285233	0	NA	NA	9	NA	NA	9	3.82618	0.00365882	0	NA	NA	9	42.9475	0.0415294	0	NA	NA	9	-0.00334203	0.0202697	0	NA	NA	9	-0.125751	0.0381881	0	0.127607	0.0375464	0	181.875
2010-02-07 11:30:00	NA	NA	9	NA	NA	9	912.931	0.314139	0	NA	NA	9	NA	NA	9	2.75218	0.0160714	0	NA	NA	9	NA	NA	9	3.82689	0.0036727	0	NA	NA	9	42.9661	0.0480981	0	NA	NA	9	-0.00457318	0.0149685	0	NA	NA	9	-0.0412211	0.0258249	0	0.0447724	0.0246242	0	184.387
2010-02-07 12:30:00	NA	NA	9	NA	NA	9	913.182	0.316296	0	NA	NA	9	NA	NA	9	2.76792	0.0135608	0	NA	NA	9	NA	NA	9	3.82912	0.00373176	0	NA	NA	9	42.9731	0.0508336	0	NA	NA	9	0.00801645	0.0246673	0	NA	NA	9	-0.0248202	0.0199052	0	0.0379823	0.0155537	0	161.135
2010-02-07 13:30:00	NA	NA	9	NA	NA	9	913.367	0.297513	0	NA	NA	9	NA	NA	9	2.78238	0.0205649	0	NA	NA	9	NA	NA	9	3.83073	0.00465512	0	NA	NA	9	42.974	0.0503713	0	NA	NA	9	0.0279955	0.00886476	0	NA	NA	9	-0.0152325	0.0195009	0	0.035162	0.0154323	0	112.01
2010-02-07 14:30:00	NA	NA	9	NA	NA	9	913.329	0.342146	0	NA	NA	9	NA	NA	9	2.81232	0.0121482	0	NA	NA	9	NA	NA	9	3.83368	0.00430919	0	NA	NA	9	42.9712	0.0548508	0	NA	NA	9	0.024648	0.00275711	0	NA	NA	9	-0.00800393	0.00824536	0	0.0270368	0.00401903	0	106.746
2010-02-07 15:30:00	NA	NA	9	NA	NA	9	913.175	0.329475	0	NA	NA	9	NA	NA	9	2.81314	0.0134883	0	NA	NA	9	NA	NA	9	3.83373	0.00427508	0	NA	NA	9	42.971	0.0548126	0	NA	NA	9	0.026146	0.00298148	0	NA	NA	9	-0.0186209	0.0155946	0	0.0343418	0.0101486	0	120.127
2010-02-07 16:30:00	NA	NA	9	NA	NA	9	912.984	0.3348	0	NA	NA	9	NA	NA	9	2.8285	0.0125855	0	NA	NA	9	NA	NA	9	3.83672	0.00441193	0	NA	NA	9	42.9882	0.053582	0	NA	NA	9	0.018176	0.00424895	0	NA	NA	9	-0.0167309	0.00662424	0	0.0251565	0.006274	0	131.334
2010-02-07 17:30:00	NA	NA	9	NA	NA	9	912.755	0.306006	0	NA	NA	9	NA	NA	9	2.75352	0.0522567	0	NA	NA	9	NA	NA	9	3.82601	0.00655789	0	NA	NA	9	42.9533	0.0505623	0	NA	NA	9	-0.00188988	0.0233143	0	NA	NA	9	-0.0519737	0.026217	0	0.0578543	0.0242538	0	178.07
2010-02-07 18:30:00	NA	NA	9	NA	NA	9	912.405	0.357161	0	NA	NA	9	NA	NA	9	2.70422	0.0208319	0	NA	NA	9	NA	NA	9	3.8235	0.00368139	0	NA	NA	9	42.9876	0.0455968	0	NA	NA	9	0.0168695	0.0201058	0	NA	NA	9	-0.0930341	0.0288354	0	0.0966265	0.0289609	0	171.159
2010-02-07 19:30:00	NA	NA	9	NA	NA	9	911.762	0.381753	0	NA	NA	9	NA	NA	9	2.76288	0.0137696	0	NA	NA	9	NA	NA	9	3.8296	0.00372201	0	NA	NA	9	42.9868	0.0471736	0	NA	NA	9	0.0114342	0.0122532	0	NA	NA	9	-0.0179743	0.0246346	0	0.0307794	0.0162225	0	125.518
2010-02-07 20:30:00	NA	NA	9	NA	NA	9	911.428	0.333618	0	NA	NA	9	NA	NA	9	2.75406	0.0146175	0	NA	NA	9	NA	NA	9	3.83005	0.0041904	0	NA	NA	9	43.0043	0.0531508	0	NA	NA	9	0.0227864	0.00732488	0	NA	NA	9	-0.0154658	0.0146805	0	0.0299763	0.0113545	0	116.695
2010-02-07 21:30:00	NA	NA	9	NA	NA	9	911.07	0.325249	0	NA	NA	9	NA	NA	9	2.74683	0.0162688	0	NA	NA	9	NA	NA	9	3.82895	0.00408985	0	NA	NA	9	43.0003	0.0519489	0	NA	NA	9	0.0235954	0.00396854	0	NA	NA	9	-0.00195388	0.00449594	0	0.0240922	0.00400979	0	94.6299
2010-02-07 22:30:00	NA	NA	9	NA	NA	9	911.201	0.300749	0	NA	NA	9	NA	NA	9	2.75363	0.027767	0	NA	NA	9	NA	NA	9	3.8299	0.00394701	0	NA	NA	9	43.0032	0.0624197	0	NA	NA	9	0.0118294	0.0114018	0	NA	NA	9	-0.0403109	0.0505162	0	0.0453744	0.048865	0	147.573
2010-02-07 23:30:00	NA	NA	9	NA	NA	9	911.263	0.328591	0	NA	NA	9	NA	NA	9	2.81372	0.0177885	0	NA	NA	9	NA	NA	9	3.83207	0.00385239	0	NA	NA	9	42.9505	0.0446878	0	NA	NA	9	0.00772202	0.0126851	0	NA	NA	9	-0.105487	0.051822	0	0.107222	0.0503678	0	175.459
2010-02-08 00:30:00	NA	NA	9	NA	NA	9	911.552	0.346322	0	NA	NA	9	NA	NA	9	2.81099	0.0141051	0	NA	NA	9	NA	NA	9	3.83205	0.00451865	0	NA	NA	9	42.9537	0.050727	0	NA	NA	9	0.00708272	0.0181997	0	NA	NA	9	0.0129442	0.0182319	0	0.0275625	0.0110162	0	170.388
2010-02-08 01:30:00	NA	NA	9	NA	NA	9	911.858	0.324113	0	NA	NA	9	NA	NA	9	2.79002	0.0129221	0	NA	NA	9	NA	NA	9	3.83202	0.00415528	0	NA	NA	9	42.981	0.055437	0	NA	NA	9	0.0252397	0.00575975	0	NA	NA	9	0.00296873	0.00788374	0	0.0265739	0.00591416	0	84.1859
2010-02-08 02:30:00	NA	NA	9	NA	NA	9	912.177	0.345688	0	NA	NA	9	NA	NA	9	2.76613	0.0149278	0	NA	NA	9	NA	NA	9	3.83039	0.00401268	0	NA	NA	9	42.9921	0.0514232	0	NA	NA	9	0.0220999	0.00554149	0	NA	NA	9	0.00807544	0.00797232	0	0.024894	0.00530436	0	70.3035
2010-02-08 03:30:00	NA	NA	9	NA	NA	9	912.435	0.312432	0	NA	NA	9	NA	NA	9	2.74007	0.0107059	0	NA	NA	9	NA	NA	9	3.82904	0.00390337	0	NA	NA	9	43.0096	0.0511614	0	NA	NA	9	0.0213485	0.0029428	0	NA	NA	9	0.00144136	0.00657701	0	0.0223509	0.00318828	0	86.3245
2010-02-08 04:30:00	NA	NA	9	NA	NA	9	912.57	0.314079	0	NA	NA	9	NA	NA	9	2.74032	0.011744	0	NA	NA	9	NA	NA	9	3.82936	0.00417949	0	NA	NA	9	43.0132	0.055725	0	NA	NA	9	0.0219264	0.00429207	0	NA	NA	9	-0.0106602	0.00875205	0	0.0258521	0.0045886	0	114.826
2010-02-08 05:30:00	NA	NA	9	NA	NA	9	912.613	0.317607	0	NA	NA	9	NA	NA	9	2.75467	0.0193359	0	NA	NA	9	NA	NA	9	3.82778	0.00414735	0	NA	NA	9	42.9742	0.0543324	0	NA	NA	9	0.0336315	0.022468	0	NA	NA	9	-0.0618919	0.053749	0	0.0762299	0.050438	0	135.921
2010-02-08 06:30:00	NA	NA	9	NA	NA	9	912.537	0.310508	0	NA	NA	9	NA	NA	9	2.80301	0.0264993	0	NA	NA	9	NA	NA	9	3.83074	0.00409949	0	NA	NA	9	42.9472	0.044945	0	NA	NA	9	0.0165905	0.0267591	0	NA	NA	9	-0.124815	0.0342087	0	0.128874	0.0336372	0	172.03
2010-02-08 07:30:00	NA	NA	9	NA	NA	9	912.373	0.318482	0	NA	NA	9	NA	NA	9	2.81647	0.0148347	0	NA	NA	9	NA	NA	9	3.83207	0.00388358	0	NA	NA	9	42.946	0.0498965	0	NA	NA	9	0.00567476	0.0194029	0	NA	NA	9	-0.0591163	0.0207418	0	0.0626968	0.0200631	0	172.345
2010-02-08 08:30:00	NA	NA	9	NA	NA	9	912.247	0.289586	0	NA	NA	9	NA	NA	9	2.82026	0.0210519	0	NA	NA	9	NA	NA	9	3.83132	0.00358418	0	NA	NA	9	42.9317	0.044741	0	NA	NA	9	-0.000270992	0.0146784	0	NA	NA	9	-0.132812	0.027647	0	0.133663	0.0274392	0	180.334
2010-02-08 09:30:00	NA	NA	9	NA	NA	9	912.172	0.32148	0	NA	NA	9	NA	NA	9	2.87291	0.0137091	0	NA	NA	9	NA	NA	9	3.836	0.00355378	0	NA	NA	9	42.9206	0.046389	0	NA	NA	9	0.00671321	0.016979	0	NA	NA	9	-0.175878	0.019214	0	0.176835	0.0191021	0	177.907
2010-02-08 10:30:00	NA	NA	9	NA	NA	9	912.192	0.350017	0	NA	NA	9	NA	NA	9	2.88171	0.0139548	0	NA	NA	9	NA	NA	9	3.8356	0.00347232	0	NA	NA	9	42.9039	0.041865	0	NA	NA	9	-0.00397579	0.0154813	0	NA	NA	9	-0.118489	0.0453167	0	0.119933	0.0443259	0	182.886
2010-02-08 11:30:00	NA	NA	9	NA	NA	9	912.409	0.296842	0	NA	NA	9	NA	NA	9	2.88391	0.018595	0	NA	NA	9	NA	NA	9	3.8366	0.00328734	0	NA	NA	9	42.9135	0.0473688	0	NA	NA	9	0.00643798	0.0131283	0	NA	NA	9	-0.070282	0.0231823	0	0.0719233	0.0227532	0	174.179
2010-02-08 12:30:00	NA	NA	9	NA	NA	9	912.41	0.289528	0	NA	NA	9	NA	NA	9	2.91354	0.0193529	0	NA	NA	9	NA	NA	9	3.84019	0.00417585	0	NA	NA	9	42.9191	0.0486292	0	NA	NA	9	0.000962163	0.0309817	0	NA	NA	9	-0.0615934	0.0406918	0	0.0720413	0.0349231	0	165.714
2010-02-08 13:30:00	NA	NA	9	NA	NA	9	912.521	0.345575	0	NA	NA	9	NA	NA	9	2.93249	0.0164075	0	NA	NA	9	NA	NA	9	3.84386	0.0043064	0	NA	NA	9	42.9399	0.0547537	0	NA	NA	9	0.0211088	0.0102545	0	NA	NA	9	0.00108748	0.0147437	0	0.0260321	0.00956534	0	81.824
2010-02-08 14:30:00	NA	NA	9	NA	NA	9	912.788	0.309847	0	NA	NA	9	NA	NA	9	2.90213	0.0127075	0	NA	NA	9	NA	NA	9	3.84154	0.00432065	0	NA	NA	9	42.951	0.0562514	0	NA	NA	9	0.00810123	0.00627657	0	NA	NA	9	0.0263691	0.0118388	0	0.0282801	0.0118628	0	49.221
2010-02-08 15:30:00	NA	NA	9	NA	NA	9	912.928	0.286749	0	NA	NA	9	NA	NA	9	2.89761	0.0106834	0	NA	NA	9	NA	NA	9	3.84048	0.00367336	0	NA	NA	9	42.9436	0.0486572	0	NA	NA	9	0.00898241	0.0066356	0	NA	NA	9	-0.00053242	0.0202317	0	0.020833	0.0100055	0	112.776
2010-02-08 16:30:00	NA	NA	9	NA	NA	9	912.757	0.33602	0	NA	NA	9	NA	NA	9	2.91038	0.0137765	0	NA	NA	9	NA	NA	9	3.84136	0.00448654	0	NA	NA	9	42.9377	0.0565947	0	NA	NA	9	0.0191839	0.00830594	0	NA	NA	9	-0.00522816	0.011062	0	0.023444	0.00608326	0	110.868
2010-02-08 17:30:00	NA	NA	9	NA	NA	9	912.44	0.331994	0	NA	NA	9	NA	NA	9	2.90937	0.018743	0	NA	NA	9	NA	NA	9	3.84073	0.00442735	0	NA	NA	9	42.9314	0.059428	0	NA	NA	9	0.0151853	0.00423292	0	NA	NA	9	-0.0187818	0.00317911	0	0.0243725	0.00416543	0	141.437
2010-02-08 18:30:00	NA	NA	9	NA	NA	9	912.158	0.377344	0	NA	NA	9	NA	NA	9	2.90816	0.0140014	0	NA	NA	9	NA	NA	9	3.84003	0.0041957	0	NA	NA	9	42.9245	0.0498438	0	NA	NA	9	0.0172512	0.00943715	0	NA	NA	9	-0.0171204	0.00508165	0	0.0258814	0.00597549	0	137.455
2010-02-08 19:30:00	NA	NA	9	NA	NA	9	911.66	0.329679	0	NA	NA	9	NA	NA	9	2.91001	0.00940122	0	NA	NA	9	NA	NA	9	3.84055	0.00399877	0	NA	NA	9	42.9288	0.0509425	0	NA	NA	9	0.00920915	0.00430003	0	NA	NA	9	-0.0173627	0.00390496	0	0.020179	0.00357896	0	152.22
2010-02-08 20:30:00	NA	NA	9	NA	NA	9	911.177	0.318209	0	NA	NA	9	NA	NA	9	2.90896	0.0148222	0	NA	NA	9	NA	NA	9	3.8401	0.0044772	0	NA	NA	9	42.9249	0.0567211	0	NA	NA	9	0.0083599	0.00520421	0	NA	NA	9	-0.00162395	0.0105893	0	0.0138878	0.00433634	0	105.251
2010-02-08 21:30:00	NA	NA	9	NA	NA	9	910.908	0.294749	0	NA	NA	9	NA	NA	9	2.89444	0.0158972	0	NA	NA	9	NA	NA	9	3.83655	0.00344394	0	NA	NA	9	42.8997	0.042708	0	NA	NA	9	0.0328728	0.0136078	0	NA	NA	9	0.0176232	0.0136473	0	0.0388818	0.0158352	0	62.2066
2010-02-08 22:30:00	NA	NA	9	NA	NA	9	910.714	0.324567	0	NA	NA	9	NA	NA	9	2.86652	0.01066	0	NA	NA	9	NA	NA	9	3.83544	0.00393734	0	NA	NA	9	42.923	0.0501275	0	NA	NA	9	0.0252737	0.0153332	0	NA	NA	9	0.00920372	0.0172911	0	0.0301	0.0187468	0	90.5436
2010-02-08 23:30:00	NA	NA	9	NA	NA	9	910.591	0.311738	0	NA	NA	9	NA	NA	9	2.88676	0.0223128	0	NA	NA	9	NA	NA	9	3.83685	0.00417851	0	NA	NA	9	42.9139	0.0481001	0	NA	NA	9	0.00305777	0.0204667	0	NA	NA	9	-0.00736444	0.00791665	0	0.0201765	0.0117413	0	188.025
2010-02-09 00:30:00	NA	NA	9	NA	NA	9	910.753	0.311167	0	NA	NA	9	NA	NA	9	2.87301	0.0140372	0	NA	NA	9	NA	NA	9	3.83575	0.00365338	0	NA	NA	9	42.9183	0.0456433	0	NA	NA	9	0.0243972	0.0232047	0	NA	NA	9	-0.0124576	0.0124172	0	0.0339832	0.0169698	0	132.87
2010-02-09 01:30:00	NA	NA	9	NA	NA	9	910.986	0.299471	0	NA	NA	9	NA	NA	9	2.88497	0.0109269	0	NA	NA	9	NA	NA	9	3.83809	0.00413351	0	NA	NA	9	42.9316	0.0522203	0	NA	NA	9	0.00733541	0.00518297	0	NA	NA	9	-0.00718996	0.00848087	0	0.0130425	0.00584368	0	124.931
2010-02-09 02:30:00	NA	NA	9	NA	NA	9	911.274	0.337745	0	NA	NA	9	NA	NA	9	2.91822	0.020185	0	NA	NA	9	NA	NA	9	3.84125	0.00482301	0	NA	NA	9	42.9269	0.0526705	0	NA	NA	9	0.0152393	0.00348183	0	NA	NA	9	-0.0112811	0.00377186	0	0.019311	0.00359516	0	126.458
2010-02-09 03:30:00	NA	NA	9	NA	NA	9	911.679	0.374612	0	NA	NA	9	NA	NA	9	2.88761	0.0320625	0	NA	NA	9	NA	NA	9	3.83704	0.00534482	0	NA	NA	9	42.9145	0.0479038	0	NA	NA	9	0.032484	0.0216777	0	NA	NA	9	0.00143883	0.0184073	0	0.0363378	0.0233548	0	101.899
2010-02-09 04:30:00	NA	NA	9	NA	NA	9	912.326	0.35356	0	NA	NA	9	NA	NA	9	2.77611	0.0245402	0	NA	NA	9	NA	NA	9	3.82673	0.00313911	0	NA	NA	9	42.9326	0.0387146	0	NA	NA	9	0.0737669	0.0231213	0	NA	NA	9	0.0426836	0.0215919	0	0.0867701	0.0271117	0	61.5453
2010-02-09 05:30:00	NA	NA	9	NA	NA	9	912.531	0.325242	0	NA	NA	9	NA	NA	9	2.73883	0.01927	0	NA	NA	9	NA	NA	9	3.82457	0.00405164	0	NA	NA	9	42.9549	0.049394	0	NA	NA	9	0.0174221	0.0163449	0	NA	NA	9	-0.014365	0.011079	0	0.0277427	0.011401	0	137.398
2010-02-09 06:30:00	NA	NA	9	NA	NA	9	912.625	0.312074	0	NA	NA	9	NA	NA	9	2.71339	0.0184853	0	NA	NA	9	NA	NA	9	3.82223	0.00350799	0	NA	NA	9	42.9591	0.0406527	0	NA	NA	9	-0.0389011	0.0250533	0	NA	NA	9	-0.0436645	0.0147362	0	0.0612463	0.0226587	0	215.652
2010-02-09 07:30:00	NA	NA	9	NA	NA	9	912.548	0.293657	0	NA	NA	9	NA	NA	9	2.73296	0.0127689	0	NA	NA	9	NA	NA	9	3.82327	0.00293102	0	NA	NA	9	42.9463	0.0404536	0	NA	NA	9	-0.0685835	0.0186947	0	NA	NA	9	-0.0601093	0.0137602	0	0.0919632	0.0199588	0	228.177
2010-02-09 08:30:00	NA	NA	9	NA	NA	9	912.323	0.320656	0	NA	NA	9	NA	NA	9	2.75657	0.0199078	0	NA	NA	9	NA	NA	9	3.82561	0.00321675	0	NA	NA	9	42.9445	0.0371272	0	NA	NA	9	-0.0551889	0.0254003	0	NA	NA	9	-0.0380149	0.015461	0	0.0688551	0.0251794	0	232.643
2010-02-09 09:30:00	NA	NA	9	NA	NA	9	912.118	0.307793	0	NA	NA	9	NA	NA	9	2.79282	0.0172806	0	NA	NA	9	NA	NA	9	3.82835	0.00344048	0	NA	NA	9	42.9309	0.042336	0	NA	NA	9	-0.0225043	0.0173098	0	NA	NA	9	-0.0561983	0.0239497	0	0.0633385	0.0229335	0	201.884
2010-02-09 10:30:00	NA	NA	9	NA	NA	9	911.92	0.31263	0	NA	NA	9	NA	NA	9	2.81847	0.0306948	0	NA	NA	9	NA	NA	9	3.83121	0.00408815	0	NA	NA	9	42.9329	0.055744	0	NA	NA	9	0.00447115	0.0125363	0	NA	NA	9	-0.0297015	0.0150317	0	0.0329844	0.0140432	0	164.71
2010-02-09 11:30:00	NA	NA	9	NA	NA	9	911.885	0.30426	0	NA	NA	9	NA	NA	9	2.84337	0.0113323	0	NA	NA	9	NA	NA	9	3.83288	0.00340723	0	NA	NA	9	42.9208	0.0431624	0	NA	NA	9	-0.017956	0.0187213	0	NA	NA	9	-0.0299039	0.0136454	0	0.0378219	0.0179647	0	203.302
2010-02-09 12:30:00	NA	NA	9	NA	NA	9	912.092	0.285508	0	NA	NA	9	NA	NA	9	2.84412	0.0115191	0	NA	NA	9	NA	NA	9	3.83292	0.00292204	0	NA	NA	9	42.9202	0.037498	0	NA	NA	9	-0.0940327	0.0273939	0	NA	NA	9	-0.0766249	0.0181643	0	0.122393	0.0285267	0	230.132
2010-02-09 13:30:00	NA	NA	9	NA	NA	9	912.424	0.322266	0	NA	NA	9	NA	NA	9	2.81904	0.0165602	0	NA	NA	9	NA	NA	9	3.8315	0.00305015	0	NA	NA	9	42.9354	0.043753	0	NA	NA	9	-0.112323	0.0301883	0	NA	NA	9	-0.0696211	0.0195655	0	0.133441	0.0308397	0	237.56
2010-02-09 14:30:00	NA	NA	9	NA	NA	9	912.698	0.291963	0	NA	NA	9	NA	NA	9	2.8424	0.0115076	0	NA	NA	9	NA	NA	9	3.83225	0.00325531	0	NA	NA	9	42.9136	0.0422395	0	NA	NA	9	-0.0756543	0.0280585	0	NA	NA	9	-0.0904502	0.0328318	0	0.122385	0.02813	0	220.576
2010-02-09 15:30:00	NA	NA	9	NA	NA	9	912.952	0.292174	0	NA	NA	9	NA	NA	9	2.85833	0.0127924	0	NA	NA	9	NA	NA	9	3.83394	0.00323483	0	NA	NA	9	42.9136	0.0414328	0	NA	NA	9	-0.0904571	0.0222871	0	NA	NA	9	-0.0965905	0.0163067	0	0.133853	0.0189177	0	222.642
2010-02-09 16:30:00	NA	NA	9	NA	NA	9	912.953	0.34907	0	NA	NA	9	NA	NA	9	2.90758	0.0308346	0	NA	NA	9	NA	NA	9	3.83781	0.00349821	0	NA	NA	9	42.8968	0.0385239	0	NA	NA	9	-0.0841372	0.0250968	0	NA	NA	9	-0.0620111	0.0211971	0	0.105819	0.028386	0	233.347
2010-02-09 17:30:00	NA	NA	9	NA	NA	9	912.823	0.33101	0	NA	NA	9	NA	NA	9	2.96149	0.0140886	0	NA	NA	9	NA	NA	9	3.84187	0.00326031	0	NA	NA	9	42.8763	0.0426983	0	NA	NA	9	-0.0405569	0.0347954	0	NA	NA	9	-0.0363082	0.026641	0	0.0603578	0.0352161	0	211.508
2010-02-09 18:30:00	NA	NA	9	NA	NA	9	912.538	0.341935	0	NA	NA	9	NA	NA	9	2.95073	0.014641	0	NA	NA	9	NA	NA	9	3.84118	0.0039603	0	NA	NA	9	42.8821	0.0485628	0	NA	NA	9	0.0215045	0.0117398	0	NA	NA	9	0.00892793	0.0111165	0	0.026005	0.0112792	0	84.9952
2010-02-09 19:30:00	NA	NA	9	NA	NA	9	912.111	0.327497	0	NA	NA	9	NA	NA	9	2.95437	0.0179507	0	NA	NA	9	NA	NA	9	3.84103	0.00332409	0	NA	NA	9	42.8757	0.0417914	0	NA	NA	9	0.0199959	0.0129572	0	NA	NA	9	0.0285036	0.014574	0	0.0379457	0.0123523	0	48.5538
2010-02-09 20:30:00	NA	NA	9	NA	NA	9	911.677	0.320465	0	NA	NA	9	NA	NA	9	2.91566	0.0175677	0	NA	NA	9	NA	NA	9	3.83842	0.00306582	0	NA	NA	9	42.8946	0.038676	0	NA	NA	9	0.048294	0.0124749	0	NA	NA	9	0.0318281	0.0202941	0	0.0605939	0.0155246	0	59.0205
2010-02-09 21:30:00	NA	NA	9	NA	NA	9	911.187	0.34429	0	NA	NA	9	NA	NA	9	2.89129	0.0133038	0	NA	NA	9	NA	NA	9	3.83701	0.0035155	0	NA	NA	9	42.9096	0.0470946	0	NA	NA	9	0.0273029	0.00846147	0	NA	NA	9	0.0130124	0.00952276	0	0.0311001	0.0104788	0	67.5201
2010-02-09 22:30:00	NA	NA	9	NA	NA	9	910.802	0.344862	0	NA	NA	9	NA	NA	9	2.85958	0.0140867	0	NA	NA	9	NA	NA	9	3.83442	0.00348593	0	NA	NA	9	42.9193	0.044297	0	NA	NA	9	0.0264705	0.00943396	0	NA	NA	9	0.00953764	0.00573138	0	0.0286437	0.00964496	0	70.2281
2010-02-09 23:30:00	NA	NA	9	NA	NA	9	910.544	0.322832	0	NA	NA	9	NA	NA	9	2.85304	0.0114467	0	NA	NA	9	NA	NA	9	3.83292	0.00329151	0	NA	NA	9	42.9094	0.0445429	0	NA	NA	9	0.0286491	0.00996035	0	NA	NA	9	0.0184255	0.0072595	0	0.0347194	0.0103306	0	56.284
2010-02-10 00:30:00	NA	NA	9	NA	NA	9	910.538	0.303354	0	NA	NA	9	NA	NA	9	2.84822	0.00952381	0	NA	NA	9	NA	NA	9	3.83466	0.00377961	0	NA	NA	9	42.9376	0.0492748	0	NA	NA	9	0.00187129	0.00379138	0	NA	NA	9	0.00977597	0.00561641	0	0.0110086	0.00487726	0	131.309
2010-02-10 01:30:00	NA	NA	9	NA	NA	9	910.733	0.32829	0	NA	NA	9	NA	NA	9	2.8536	0.00987046	0	NA	NA	9	NA	NA	9	3.83429	0.00355662	0	NA	NA	9	42.9257	0.0444047	0	NA	NA	9	0.0187464	0.00579714	0	NA	NA	9	0.0118374	0.00933079	0	0.0232986	0.00832862	0	61.3778
2010-02-10 02:30:00	NA	NA	9	NA	NA	9	911.059	0.34969	0	NA	NA	9	NA	NA	9	2.84677	0.0102157	0	NA	NA	9	NA	NA	9	3.83413	0.00391433	0	NA	NA	9	42.9326	0.0516061	0	NA	NA	9	0.0256511	0.00551961	0	NA	NA	9	-0.00635334	0.0056972	0	0.0271136	0.00510917	0	104.179
2010-02-10 03:30:00	NA	NA	9	NA	NA	9	911.544	0.351283	0	NA	NA	9	NA	NA	9	2.83357	0.0136772	0	NA	NA	9	NA	NA	9	3.83241	0.00354105	0	NA	NA	9	42.9282	0.0444831	0	NA	NA	9	0.0247009	0.0082661	0	NA	NA	9	-0.00183529	0.00790518	0	0.026118	0.00788253	0	95.0945
2010-02-10 04:30:00	NA	NA	9	NA	NA	9	911.957	0.363451	0	NA	NA	9	NA	NA	9	2.82439	0.011881	0	NA	NA	9	NA	NA	9	3.83109	0.00386415	0	NA	NA	9	42.9235	0.0517502	0	NA	NA	9	-0.000222654	0.00968375	0	NA	NA	9	-0.0281157	0.00979497	0	0.0297004	0.00990423	0	175.757
2010-02-10 05:30:00	NA	NA	9	NA	NA	9	912.42	0.299846	0	NA	NA	9	NA	NA	9	2.81281	0.0216821	0	NA	NA	9	NA	NA	9	3.82994	0.00307127	0	NA	NA	9	42.9241	0.0378388	0	NA	NA	9	-0.0608204	0.0265477	0	NA	NA	9	-0.0482875	0.0218332	0	0.0800932	0.0282335	0	229.879
2010-02-10 06:30:00	NA	NA	9	NA	NA	9	912.615	0.326957	0	NA	NA	9	NA	NA	9	2.80394	0.0168338	0	NA	NA	9	NA	NA	9	3.82967	0.00326104	0	NA	NA	9	42.9324	0.0423922	0	NA	NA	9	-0.118571	0.0281092	0	NA	NA	9	-0.0785312	0.02048	0	0.143153	0.0307094	0	236.219
2010-02-10 07:30:00	NA	NA	9	NA	NA	9	912.665	0.29499	0	NA	NA	9	NA	NA	9	2.78613	0.0122986	0	NA	NA	9	NA	NA	9	3.82865	0.00297829	0	NA	NA	9	42.9432	0.0395167	0	NA	NA	9	-0.100162	0.0246375	0	NA	NA	9	-0.0813938	0.0196483	0	0.130014	0.0273271	0	230.541
2010-02-10 08:30:00	NA	NA	9	NA	NA	9	912.338	0.343514	0	NA	NA	9	NA	NA	9	2.84803	0.0256098	0	NA	NA	9	NA	NA	9	3.83368	0.00344236	0	NA	NA	9	42.9244	0.0434894	0	NA	NA	9	-0.0997532	0.0230864	0	NA	NA	9	-0.0764877	0.0177754	0	0.126504	0.0254299	0	232.219
2010-02-10 09:30:00	NA	NA	9	NA	NA	9	912.096	0.306839	0	NA	NA	9	NA	NA	9	2.86917	0.0121658	0	NA	NA	9	NA	NA	9	3.83532	0.0032272	0	NA	NA	9	42.9171	0.0432624	0	NA	NA	9	-0.0866614	0.0220083	0	NA	NA	9	-0.0729696	0.0152126	0	0.114193	0.0225943	0	229.397
2010-02-10 10:30:00	NA	NA	9	NA	NA	9	911.786	0.312716	0	NA	NA	9	NA	NA	9	2.88897	0.0129772	0	NA	NA	9	NA	NA	9	3.837	0.00312169	0	NA	NA	9	42.9121	0.0413546	0	NA	NA	9	-0.0190884	0.0335098	0	NA	NA	9	-0.0473924	0.0260686	0	0.0591418	0.030243	0	185.647
2010-02-10 11:30:00	NA	NA	9	NA	NA	9	911.701	0.320894	0	NA	NA	9	NA	NA	9	2.89094	0.0247275	0	NA	NA	9	NA	NA	9	3.83431	0.00339467	0	NA	NA	9	42.8758	0.0503457	0	NA	NA	9	0.0240639	0.0169438	0	NA	NA	9	-0.000826322	0.00989292	0	0.0267825	0.0157271	0	104.913
2010-02-10 12:30:00	NA	NA	9	NA	NA	9	911.615	0.311614	0	NA	NA	9	NA	NA	9	2.92637	0.0150488	0	NA	NA	9	NA	NA	9	3.835	0.00362013	0	NA	NA	9	42.8375	0.0465343	0	NA	NA	9	0.0149829	0.0105693	0	NA	NA	9	-0.0104566	0.0090618	0	0.0222674	0.00563288	0	128.167
2010-02-10 13:30:00	NA	NA	9	NA	NA	9	911.888	0.353631	0	NA	NA	9	NA	NA	9	2.91132	0.026356	0	NA	NA	9	NA	NA	9	3.83446	0.00375296	0	NA	NA	9	42.8505	0.0435432	0	NA	NA	9	-0.00460988	0.0135681	0	NA	NA	9	0.0318148	0.0372786	0	0.0416019	0.0295992	0	193.983
2010-02-10 14:30:00	NA	NA	9	NA	NA	9	912.276	0.306926	0	NA	NA	9	NA	NA	9	2.86199	0.0154341	0	NA	NA	9	NA	NA	9	3.83077	0.00340935	0	NA	NA	9	42.8694	0.0424805	0	NA	NA	9	0.00996827	0.00770072	0	NA	NA	9	0.0159132	0.0139317	0	0.0218401	0.0113548	0	78.896
2010-02-10 15:30:00	NA	NA	9	NA	NA	9	912.663	0.351058	0	NA	NA	9	NA	NA	9	2.83255	0.0123546	0	NA	NA	9	NA	NA	9	3.82994	0.00385994	0	NA	NA	9	42.8977	0.0483487	0	NA	NA	9	0.021498	0.00478811	0	NA	NA	9	0.00996539	0.0060881	0	0.0241615	0.00613779	0	66.6311
2010-02-10 16:30:00	NA	NA	9	NA	NA	9	912.759	0.312354	0	NA	NA	9	NA	NA	9	2.86032	0.0245743	0	NA	NA	9	NA	NA	9	3.83513	0.00489327	0	NA	NA	9	42.926	0.0571163	0	NA	NA	9	0.0185899	0.00215979	0	NA	NA	9	0.00197005	0.00333016	0	0.0189592	0.00240027	0	84.0391
2010-02-10 17:30:00	NA	NA	9	NA	NA	9	912.971	0.340642	0	NA	NA	9	NA	NA	9	2.8367	0.0144877	0	NA	NA	9	NA	NA	9	3.82897	0.00341657	0	NA	NA	9	42.8799	0.043992	0	NA	NA	9	0.0150723	0.00779843	0	NA	NA	9	-0.017679	0.0156975	0	0.0266934	0.0115893	0	130.176
2010-02-10 18:30:00	NA	NA	9	NA	NA	9	913.224	0.281133	0	NA	NA	9	NA	NA	9	2.77289	0.035739	0	NA	NA	9	NA	NA	9	3.82579	0.00409932	0	NA	NA	9	42.9244	0.0443345	0	NA	NA	9	-0.00212919	0.0148579	0	NA	NA	9	-0.103688	0.0377546	0	0.105114	0.0367799	0	182.034
2010-02-10 19:30:00	NA	NA	9	NA	NA	9	912.804	0.403148	0	NA	NA	9	NA	NA	9	2.86653	0.0349268	0	NA	NA	9	NA	NA	9	3.83237	0.00376596	0	NA	NA	9	42.8831	0.0436274	0	NA	NA	9	-0.012924	0.0136488	0	NA	NA	9	-0.121388	0.0232159	0	0.122977	0.0224493	0	186.524
2010-02-10 20:30:00	NA	NA	9	NA	NA	9	912.321	0.393465	0	NA	NA	9	NA	NA	9	2.87283	0.0166271	0	NA	NA	9	NA	NA	9	3.83287	0.0029528	0	NA	NA	9	42.8813	0.0405256	0	NA	NA	9	0.0148627	0.020188	0	NA	NA	9	-0.0937877	0.0225879	0	0.0969076	0.0233131	0	171.718
2010-02-10 21:30:00	NA	NA	9	NA	NA	9	911.686	0.404009	0	NA	NA	9	NA	NA	9	2.89042	0.0180541	0	NA	NA	9	NA	NA	9	3.83401	0.00319546	0	NA	NA	9	42.8727	0.0412363	0	NA	NA	9	0.0278444	0.0187041	0	NA	NA	9	-0.0423436	0.0343482	0	0.0558856	0.0312158	0	138.141
2010-02-10 22:30:00	NA	NA	9	NA	NA	9	911.071	0.386021	0	NA	NA	9	NA	NA	9	2.90636	0.0146536	0	NA	NA	9	NA	NA	9	3.83383	0.00302863	0	NA	NA	9	42.8497	0.0427598	0	NA	NA	9	0.0188458	0.0156154	0	NA	NA	9	0.00169467	0.0129451	0	0.0247067	0.0126052	0	106.573
2010-02-10 23:30:00	NA	NA	9	NA	NA	9	910.486	0.365523	0	NA	NA	9	NA	NA	9	2.94453	0.0208039	0	NA	NA	9	NA	NA	9	3.83666	0.00377821	0	NA	NA	9	42.835	0.0472748	0	NA	NA	9	0.0266143	0.0115672	0	NA	NA	9	-0.00538858	0.00586171	0	0.028059	0.0108711	0	103.983
2010-02-11 00:30:00	NA	NA	9	NA	NA	9	910.092	0.342047	0	NA	NA	9	NA	NA	9	2.95301	0.017087	0	NA	NA	9	NA	NA	9	3.83799	0.0046098	0	NA	NA	9	42.8407	0.0545483	0	NA	NA	9	0.0144339	0.00330496	0	NA	NA	9	-0.0103725	0.00518189	0	0.0182226	0.00465044	0	124.479
2010-02-11 01:30:00	NA	NA	9	NA	NA	9	910.186	0.321656	0	NA	NA	9	NA	NA	9	2.96391	0.0149901	0	NA	NA	9	NA	NA	9	3.83764	0.00381377	0	NA	NA	9	42.8218	0.0468116	0	NA	NA	9	0.0200154	0.00634448	0	NA	NA	9	-0.0180191	0.00490713	0	0.0274304	0.00609867	0	132.739
2010-02-11 02:30:00	NA	NA	9	NA	NA	9	910.575	0.346265	0	NA	NA	9	NA	NA	9	2.94248	0.0469101	0	NA	NA	9	NA	NA	9	3.8366	0.00429816	0	NA	NA	9	42.837	0.0475399	0	NA	NA	9	-0.00194731	0.0199629	0	NA	NA	9	0.0485479	0.0326677	0	0.0543253	0.0295774	0	188.905
2010-02-11 03:30:00	NA	NA	9	NA	NA	9	911.256	0.316303	0	NA	NA	9	NA	NA	9	2.8193	0.0222087	0	NA	NA	9	NA	NA	9	3.82871	0.00335643	0	NA	NA	9	42.9008	0.042918	0	NA	NA	9	0.0162582	0.0208878	0	NA	NA	9	0.0883299	0.0320107	0	0.0930892	0.0293523	0	88.7179
2010-02-11 04:30:00	NA	NA	9	NA	NA	9	911.74	0.330352	0	NA	NA	9	NA	NA	9	2.81489	0.0119378	0	NA	NA	9	NA	NA	9	3.82808	0.00336668	0	NA	NA	9	42.8983	0.0450743	0	NA	NA	9	0.0231759	0.0110589	0	NA	NA	9	0.0235025	0.0301779	0	0.0389119	0.0246602	0	62.1277
2010-02-11 05:30:00	NA	NA	9	NA	NA	9	912.132	0.314952	0	NA	NA	9	NA	NA	9	2.82479	0.0124472	0	NA	NA	9	NA	NA	9	3.82841	0.00322545	0	NA	NA	9	42.8892	0.0439287	0	NA	NA	9	0.0289799	0.0184486	0	NA	NA	9	-0.00157387	0.00691273	0	0.029866	0.0183968	0	95.3211
2010-02-11 06:30:00	NA	NA	9	NA	NA	9	912.437	0.336215	0	NA	NA	9	NA	NA	9	2.85569	0.0127782	0	NA	NA	9	NA	NA	9	3.83106	0.00324401	0	NA	NA	9	42.8813	0.0405793	0	NA	NA	9	0.0222938	0.0168085	0	NA	NA	9	-0.00650553	0.010189	0	0.026428	0.0150715	0	115.064
2010-02-11 07:30:00	NA	NA	9	NA	NA	9	912.653	0.327032	0	NA	NA	9	NA	NA	9	2.83029	0.0429404	0	NA	NA	9	NA	NA	9	3.82945	0.0053571	0	NA	NA	9	42.8946	0.0498734	0	NA	NA	9	0.0185234	0.0115592	0	NA	NA	9	-0.0154395	0.0111882	0	0.0275028	0.00915341	0	130.566
2010-02-11 08:30:00	NA	NA	9	NA	NA	9	912.708	0.296544	0	NA	NA	9	NA	NA	9	2.77091	0.0267825	0	NA	NA	9	NA	NA	9	3.82544	0.00330295	0	NA	NA	9	42.923	0.0377558	0	NA	NA	9	-0.00343696	0.0166535	0	NA	NA	9	-0.0994992	0.0322618	0	0.101324	0.0310368	0	180.933
2010-02-11 09:30:00	NA	NA	9	NA	NA	9	912.425	0.355819	0	NA	NA	9	NA	NA	9	2.80709	0.0143362	0	NA	NA	9	NA	NA	9	3.82847	0.00330534	0	NA	NA	9	42.9132	0.0419916	0	NA	NA	9	-0.00895273	0.0184327	0	NA	NA	9	-0.1139	0.0216878	0	0.116038	0.0199647	0	185.388
2010-02-11 10:30:00	NA	NA	9	NA	NA	9	912.072	0.315597	0	NA	NA	9	NA	NA	9	2.84747	0.0205002	0	NA	NA	9	NA	NA	9	3.83125	0.00303164	0	NA	NA	9	42.8948	0.0389778	0	NA	NA	9	-0.000837776	0.0194489	0	NA	NA	9	-0.106727	0.0246466	0	0.108614	0.0240805	0	181.473
2010-02-11 11:30:00	NA	NA	9	NA	NA	9	911.854	0.31799	0	NA	NA	9	NA	NA	9	2.82925	0.025304	0	NA	NA	9	NA	NA	9	3.82989	0.0032085	0	NA	NA	9	42.902	0.0385164	0	NA	NA	9	0.0134044	0.0200485	0	NA	NA	9	-0.131825	0.0308192	0	0.134219	0.029904	0	174.922
2010-02-11 12:30:00	NA	NA	9	NA	NA	9	911.606	0.301279	0	NA	NA	9	NA	NA	9	2.93312	0.0221252	0	NA	NA	9	NA	NA	9	3.83707	0.00312102	0	NA	NA	9	42.8546	0.0401139	0	NA	NA	9	-0.00134631	0.0203367	0	NA	NA	9	-0.075972	0.0250057	0	0.0795617	0.0219557	0	177.824
2010-02-11 13:30:00	NA	NA	9	NA	NA	9	911.668	0.296525	0	NA	NA	9	NA	NA	9	2.90694	0.0155398	0	NA	NA	9	NA	NA	9	3.83477	0.0030638	0	NA	NA	9	42.8604	0.0414277	0	NA	NA	9	0.00870387	0.0179205	0	NA	NA	9	-0.0483528	0.0296242	0	0.0545624	0.0252015	0	163.047
2010-02-11 14:30:00	NA	NA	9	NA	NA	9	911.875	0.30855	0	NA	NA	9	NA	NA	9	2.92068	0.0132043	0	NA	NA	9	NA	NA	9	3.83551	0.00315294	0	NA	NA	9	42.8513	0.0422327	0	NA	NA	9	0.0157518	0.00683847	0	NA	NA	9	-0.0282597	0.0202034	0	0.0343569	0.017922	0	142.691
2010-02-11 15:30:00	NA	NA	9	NA	NA	9	912.05	0.32669	0	NA	NA	9	NA	NA	9	2.94158	0.0169674	0	NA	NA	9	NA	NA	9	3.83701	0.00414431	0	NA	NA	9	42.8424	0.0517507	0	NA	NA	9	0.0153239	0.0045869	0	NA	NA	9	-0.0148293	0.0107033	0	0.0234861	0.00621924	0	129.18
2010-02-11 16:30:00	NA	NA	9	NA	NA	9	912.513	0.329511	0	NA	NA	9	NA	NA	9	2.89776	0.0240753	0	NA	NA	9	NA	NA	9	3.83356	0.00413877	0	NA	NA	9	42.8568	0.0533401	0	NA	NA	9	0.0165687	0.00986128	0	NA	NA	9	0.00350129	0.00581555	0	0.0182634	0.00917971	0	96.7886
2010-02-11 17:30:00	NA	NA	9	NA	NA	9	912.785	0.335514	0	NA	NA	9	NA	NA	9	2.91287	0.0178937	0	NA	NA	9	NA	NA	9	3.83624	0.00427719	0	NA	NA	9	42.8702	0.0460977	0	NA	NA	9	0.0116749	0.010454	0	NA	NA	9	-0.00210971	0.00322109	0	0.0139391	0.00812945	0	120.14
2010-02-11 18:30:00	NA	NA	9	NA	NA	9	912.961	0.344068	0	NA	NA	9	NA	NA	9	2.90339	0.0120709	0	NA	NA	9	NA	NA	9	3.83576	0.00396588	0	NA	NA	9	42.8767	0.0503543	0	NA	NA	9	0.0145577	0.00650472	0	NA	NA	9	0.00853789	0.00663746	0	0.0176771	0.00766128	0	62.7151
2010-02-11 19:30:00	NA	NA	9	NA	NA	9	912.869	0.305201	0	NA	NA	9	NA	NA	9	2.9034	0.0115355	0	NA	NA	9	NA	NA	9	3.83585	0.0039702	0	NA	NA	9	42.8778	0.0519402	0	NA	NA	9	0.0112615	0.00506593	0	NA	NA	9	-0.0145515	0.00735397	0	0.018884	0.00785474	0	138.583
2010-02-11 20:30:00	NA	NA	9	NA	NA	9	912.602	0.33174	0	NA	NA	9	NA	NA	9	2.87105	0.0795538	0	NA	NA	9	NA	NA	9	3.83175	0.00657339	0	NA	NA	9	42.8694	0.0562815	0	NA	NA	9	0.00010301	0.0335788	0	NA	NA	9	-0.046975	0.0383749	0	0.0563234	0.0404222	0	158.065
2010-02-11 21:30:00	NA	NA	9	NA	NA	9	912.292	0.339384	0	NA	NA	9	NA	NA	9	2.75019	0.0312615	0	3.84344	0.0125742	1	NA	NA	9	3.82387	0.0038679	0	NA	NA	9	42.9311	0.0390591	0	NA	NA	9	-0.0396345	0.022616	0	NA	NA	9	-0.0966701	0.0194463	0	0.106566	0.0211925	0	201.903
2010-02-11 22:30:00	NA	NA	9	NA	NA	9	911.605	0.366172	0	NA	NA	9	NA	NA	9	2.84373	0.0314475	0	3.87648	0.00924256	1	NA	NA	9	3.8307	0.00387698	0	NA	NA	9	42.8932	0.044245	0	NA	NA	9	-0.0241216	0.0181746	0	NA	NA	9	-0.0843628	0.0150364	0	0.0896781	0.0145942	0	195.931
2010-02-11 23:30:00	NA	NA	9	NA	NA	9	910.878	0.347641	0	NA	NA	9	NA	NA	9	2.89811	0.0270594	0	NA	NA	9	NA	NA	9	3.8341	0.0034108	0	NA	NA	9	42.8642	0.0421482	0	NA	NA	9	0.0136735	0.00942241	0	NA	NA	9	-0.0481402	0.0232525	0	0.0519958	0.020742	0	159.382
2010-02-12 00:30:00	NA	NA	9	NA	NA	9	910.379	0.311349	0	NA	NA	9	NA	NA	9	2.92864	0.0129772	0	NA	NA	9	NA	NA	9	3.83693	0.00374786	0	NA	NA	9	42.8596	0.0477907	0	NA	NA	9	0.00632689	0.00590085	0	NA	NA	9	-0.0185893	0.00775833	0	0.0209494	0.00645715	0	158.345
2010-02-12 01:30:00	NA	NA	9	NA	NA	9	910.155	0.320677	0	NA	NA	9	NA	NA	9	2.93478	0.0121577	0	NA	NA	9	NA	NA	9	3.83451	0.00358261	0	NA	NA	9	42.8212	0.0469528	0	NA	NA	9	0.0140196	0.00315088	0	NA	NA	9	-0.0231458	0.010293	0	0.0280724	0.00774994	0	144.07
2010-02-12 02:30:00	NA	NA	9	NA	NA	9	910.203	0.29658	0	NA	NA	9	NA	NA	9	2.94994	0.0150429	0	NA	NA	9	NA	NA	9	3.83618	0.00364455	0	NA	NA	9	42.822	0.0438139	0	NA	NA	9	0.0201582	0.00656351	0	NA	NA	9	0.00676081	0.015303	0	0.0253897	0.00919687	0	81.6391
2010-02-12 03:30:00	NA	NA	9	NA	NA	9	910.711	0.352977	0	NA	NA	9	NA	NA	9	2.91976	0.0243274	0	NA	NA	9	NA	NA	9	3.83424	0.0037041	0	NA	NA	9	42.8373	0.043963	0	NA	NA	9	0.0122104	0.0120387	0	NA	NA	9	0.0164924	0.0218522	0	0.0287851	0.0146538	0	89.7187
2010-02-12 04:30:00	NA	NA	9	NA	NA	9	911.426	0.356669	0	NA	NA	9	NA	NA	9	2.84026	0.018071	0	NA	NA	9	NA	NA	9	3.82925	0.00341589	0	NA	NA	9	42.8796	0.0413286	0	NA	NA	9	0.0327194	0.013257	0	NA	NA	9	0.0254729	0.0213577	0	0.0449231	0.0182505	0	62.5377
2010-02-12 05:30:00	NA	NA	9	NA	NA	9	911.956	0.342801	0	NA	NA	9	NA	NA	9	2.84662	0.0144088	0	NA	NA	9	NA	NA	9	3.83113	0.00402098	0	NA	NA	9	42.8945	0.0515067	0	NA	NA	9	0.00243089	0.0149494	0	NA	NA	9	-0.0210514	0.0242446	0	0.0291094	0.020317	0	165.682
2010-02-12 06:30:00	NA	NA	9	NA	NA	9	912.358	0.311568	0	NA	NA	9	NA	NA	9	2.8938	0.0424697	0	NA	NA	9	NA	NA	9	3.83338	0.00418818	0	NA	NA	9	42.8599	0.0439346	0	NA	NA	9	0.0278547	0.0295892	0	NA	NA	9	-0.0283332	0.0288952	0	0.0518503	0.0244956	0	137.253
2010-02-12 07:30:00	NA	NA	9	NA	NA	9	912.718	0.272382	0	NA	NA	9	NA	NA	9	2.85273	0.0252853	0	NA	NA	9	NA	NA	9	3.83136	0.0036605	0	NA	NA	9	42.8888	0.0424309	0	NA	NA	9	-0.0133437	0.0222647	0	NA	NA	9	-0.0976032	0.04633	0	0.101295	0.0456678	0	186.25
2010-02-12 08:30:00	NA	NA	9	NA	NA	9	912.593	0.315106	0	NA	NA	9	NA	NA	9	2.92557	0.0172548	0	NA	NA	9	NA	NA	9	3.8369	0.00320806	0	NA	NA	9	42.8618	0.0380737	0	NA	NA	9	-0.0195531	0.015995	0	NA	NA	9	-0.146415	0.022275	0	0.148659	0.0217261	0	187.786
2010-02-12 09:30:00	NA	NA	9	NA	NA	9	912.383	0.355543	0	NA	NA	9	NA	NA	9	2.95077	0.0235889	0	NA	NA	9	NA	NA	9	3.83861	0.00352925	0	NA	NA	9	42.85	0.0412244	0	NA	NA	9	-0.00201974	0.020663	0	NA	NA	9	-0.133296	0.0246344	0	0.135094	0.0235584	0	181.3
2010-02-12 10:30:00	NA	NA	9	NA	NA	9	911.905	0.329613	0	NA	NA	9	NA	NA	9	3.01106	0.0135124	0	NA	NA	9	NA	NA	9	3.84206	0.00290472	0	NA	NA	9	42.8138	0.0399751	0	NA	NA	9	0.00239398	0.0142142	0	NA	NA	9	-0.0940441	0.0163236	0	0.0951596	0.0162193	0	178.413
2010-02-12 11:30:00	NA	NA	9	NA	NA	9	911.529	0.290709	0	NA	NA	9	NA	NA	9	3.01924	0.0107623	0	NA	NA	9	NA	NA	9	3.84194	0.0031078	0	NA	NA	9	42.8017	0.0424311	0	NA	NA	9	0.0114094	0.0130359	0	NA	NA	9	-0.0618436	0.01965	0	0.0645651	0.0184958	0	168.299
2010-02-12 12:30:00	NA	NA	9	NA	NA	9	911.445	0.309268	0	NA	NA	9	NA	NA	9	2.95038	0.0295231	0	NA	NA	9	NA	NA	9	3.83717	0.00354593	0	NA	NA	9	42.833	0.0412694	0	NA	NA	9	-0.0264607	0.0141588	0	NA	NA	9	0.00257947	0.0201439	0	0.0331191	0.0146963	0	272.338
2010-02-12 13:30:00	NA	NA	9	NA	NA	9	911.321	0.336084	0	NA	NA	9	NA	NA	9	2.98851	0.0266825	0	NA	NA	9	NA	NA	9	3.84075	0.00343276	0	NA	NA	9	42.8276	0.0500089	0	NA	NA	9	0.00721035	0.0273048	0	NA	NA	9	-0.00429743	0.0133851	0	0.029122	0.0121098	0	166.664
2010-02-12 14:30:00	NA	NA	9	NA	NA	9	911.344	0.347897	0	NA	NA	9	NA	NA	9	3.01418	0.0136868	0	NA	NA	9	NA	NA	9	3.83849	0.00447476	0	NA	NA	9	42.7654	0.0556928	0	NA	NA	9	0.0206182	0.00379654	0	NA	NA	9	0.00054661	0.00510793	0	0.0212654	0.00369892	0	87.9923
2010-02-12 15:30:00	NA	NA	9	NA	NA	9	911.699	0.341066	0	NA	NA	9	NA	NA	9	2.99772	0.0105084	0	NA	NA	9	NA	NA	9	3.83747	0.00398389	0	NA	NA	9	42.774	0.0504204	0	NA	NA	9	0.00562834	0.00975857	0	NA	NA	9	0.000330519	0.00627183	0	0.0114036	0.0060214	0	152.196
2010-02-12 16:30:00	NA	NA	9	NA	NA	9	912.281	0.394323	0	NA	NA	9	NA	NA	9	2.94814	0.028351	0	NA	NA	9	NA	NA	9	3.83387	0.00421453	0	NA	NA	9	42.7942	0.0485555	0	NA	NA	9	0.0130147	0.0103968	0	NA	NA	9	-0.0157649	0.0129065	0	0.022081	0.0143171	0	138.501
2010-02-12 17:30:00	NA	NA	9	NA	NA	9	912.818	0.335043	0	NA	NA	9	NA	NA	9	2.92745	0.0224734	0	NA	NA	9	NA	NA	9	3.83446	0.00371384	0	NA	NA	9	42.8286	0.0425703	0	NA	NA	9	0.0637063	0.0382706	0	NA	NA	9	-0.0124459	0.0193003	0	0.0687563	0.0363705	0	106.319
2010-02-12 18:30:00	NA	NA	9	NA	NA	9	913.141	0.294599	0	NA	NA	9	NA	NA	9	2.90518	0.0184734	0	NA	NA	9	NA	NA	9	3.83288	0.00330919	0	NA	NA	9	42.838	0.0401866	0	NA	NA	9	0.0854615	0.0290999	0	NA	NA	9	-0.0140657	0.019769	0	0.0888834	0.0289594	0	99.3035
2010-02-12 19:30:00	NA	NA	9	NA	NA	9	913.134	0.298353	0	NA	NA	9	NA	NA	9	2.92988	0.0130329	0	NA	NA	9	NA	NA	9	3.83537	0.00329799	0	NA	NA	9	42.8366	0.0425938	0	NA	NA	9	0.066967	0.0283984	0	NA	NA	9	-0.00324158	0.0200072	0	0.0701019	0.0280596	0	91.1683
2010-02-12 20:30:00	NA	NA	9	NA	NA	9	912.826	0.323469	0	NA	NA	9	NA	NA	9	2.97248	0.0116782	0	NA	NA	9	NA	NA	9	3.83847	0.0032846	0	NA	NA	9	42.8192	0.0434193	0	NA	NA	9	0.059461	0.0307111	0	NA	NA	9	-0.0103939	0.0187871	0	0.0623657	0.032406	0	96.1442
2010-02-12 21:30:00	NA	NA	9	NA	NA	9	912.259	0.318423	0	NA	NA	9	NA	NA	9	2.97443	0.0141072	0	NA	NA	9	NA	NA	9	3.83966	0.00404318	0	NA	NA	9	42.8318	0.0543211	0	NA	NA	9	0.024524	0.00587864	0	NA	NA	9	0.000894259	0.00433708	0	0.0249188	0.00588561	0	88.0892
2010-02-12 22:30:00	NA	NA	9	NA	NA	9	911.547	0.3688	0	NA	NA	9	NA	NA	9	2.99266	0.0173847	0	NA	NA	9	NA	NA	9	3.8413	0.0042903	0	NA	NA	9	42.8288	0.0544559	0	NA	NA	9	0.0249836	0.00625663	0	NA	NA	9	0.000286223	0.00443587	0	0.0253567	0.00633325	0	89.1757
2010-02-12 23:30:00	NA	NA	9	NA	NA	9	910.912	0.34815	0	NA	NA	9	NA	NA	9	3.07147	0.0325547	0	NA	NA	9	NA	NA	9	3.843	0.00433833	0	NA	NA	9	42.7464	0.0450966	0	NA	NA	9	0.0148273	0.0113169	0	NA	NA	9	-0.00782985	0.0164335	0	0.0242462	0.00955201	0	127.037
2010-02-13 00:30:00	NA	NA	9	NA	NA	9	910.47	0.312272	0	NA	NA	9	NA	NA	9	3.00621	0.0221516	0	NA	NA	9	NA	NA	9	3.83926	0.00293903	0	NA	NA	9	42.786	0.0397077	0	NA	NA	9	-0.0109139	0.0168735	0	NA	NA	9	-0.00308788	0.0101225	0	0.0189698	0.0124839	0	213.944
2010-02-13 01:30:00	NA	NA	9	NA	NA	9	910.229	0.299044	0	NA	NA	9	NA	NA	9	2.96071	0.0203757	0	NA	NA	9	NA	NA	9	3.83683	0.00310264	0	NA	NA	9	42.8158	0.0373473	0	NA	NA	9	-0.0186924	0.0260039	0	NA	NA	9	0.00221765	0.0176602	0	0.0313503	0.018953	0	227.128
2010-02-13 02:30:00	NA	NA	9	NA	NA	9	910.46	0.325036	0	NA	NA	9	NA	NA	9	2.88066	0.0510246	0	NA	NA	9	NA	NA	9	3.83139	0.00437527	0	NA	NA	9	42.8535	0.045146	0	NA	NA	9	-0.0145476	0.018908	0	NA	NA	9	-0.00726289	0.0162878	0	0.0263584	0.0138631	0	213.772
2010-02-13 03:30:00	NA	NA	9	NA	NA	9	910.861	0.327782	0	NA	NA	9	NA	NA	9	2.82077	0.0191965	0	NA	NA	9	NA	NA	9	3.82719	0.00345413	0	NA	NA	9	42.88	0.0414972	0	NA	NA	9	-0.0201561	0.0218813	0	NA	NA	9	0.0142488	0.0115853	0	0.0278476	0.0211359	0	257.305
2010-02-13 04:30:00	NA	NA	9	NA	NA	9	911.26	0.360526	0	NA	NA	9	NA	NA	9	2.81564	0.0164675	0	NA	NA	9	NA	NA	9	3.82759	0.00411464	0	NA	NA	9	42.8915	0.0492017	0	NA	NA	9	0.0251495	0.00964793	0	NA	NA	9	-0.0161033	0.0125479	0	0.0314799	0.0123007	0	117.588
2010-02-13 05:30:00	NA	NA	9	NA	NA	9	911.82	0.347676	0	NA	NA	9	NA	NA	9	2.83559	0.0135882	0	NA	NA	9	NA	NA	9	3.83178	0.00409166	0	NA	NA	9	42.9173	0.0519932	0	NA	NA	9	0.0276599	0.00623234	0	NA	NA	9	-0.00334633	0.00409253	0	0.0281398	0.00632497	0	96.5607
2010-02-13 06:30:00	NA	NA	9	NA	NA	9	912.38	0.360991	0	NA	NA	9	NA	NA	9	2.86202	0.0179889	0	NA	NA	9	NA	NA	9	3.83071	0.00359016	0	NA	NA	9	42.8685	0.0445533	0	NA	NA	9	0.0533218	0.0295496	0	NA	NA	9	-0.0104153	0.020216	0	0.0567064	0.0319029	0	96.8293
2010-02-13 07:30:00	NA	NA	9	NA	NA	9	912.78	0.288981	0	NA	NA	9	NA	NA	9	2.86611	0.0104539	0	NA	NA	9	NA	NA	9	3.83139	0.00315834	0	NA	NA	9	42.8714	0.0422739	0	NA	NA	9	0.0848958	0.0282646	0	NA	NA	9	-0.0165363	0.0211432	0	0.0889987	0.0283841	0	100.711
2010-02-13 08:30:00	NA	NA	9	NA	NA	9	912.911	0.322958	0	NA	NA	9	NA	NA	9	2.88431	0.0133481	0	NA	NA	9	NA	NA	9	3.8327	0.00338508	0	NA	NA	9	42.8636	0.043325	0	NA	NA	9	0.045785	0.0236083	0	NA	NA	9	-0.0111505	0.0157643	0	0.049139	0.0247329	0	102.013
2010-02-13 09:30:00	NA	NA	9	NA	NA	9	912.791	0.325627	0	NA	NA	9	NA	NA	9	2.86334	0.0165989	0	NA	NA	9	NA	NA	9	3.83111	0.00330982	0	NA	NA	9	42.8715	0.0446912	0	NA	NA	9	0.0326225	0.0285199	0	NA	NA	9	-0.0045337	0.0188646	0	0.0433061	0.0194468	0	122.394
2010-02-13 10:30:00	NA	NA	9	NA	NA	9	912.513	0.324209	0	NA	NA	9	NA	NA	9	2.83011	0.0216788	0	NA	NA	9	NA	NA	9	3.82808	0.0036251	0	NA	NA	9	42.8777	0.0459407	0	NA	NA	9	0.0073706	0.0143801	0	NA	NA	9	-0.00604979	0.0150944	0	0.0205835	0.0100842	0	152.407
2010-02-13 11:30:00	NA	NA	9	NA	NA	9	912.118	0.372794	0	NA	NA	9	NA	NA	9	2.83904	0.0266077	0	NA	NA	9	NA	NA	9	3.82962	0.00437523	0	NA	NA	9	42.8854	0.0460233	0	NA	NA	9	0.031924	0.0147609	0	NA	NA	9	-0.010449	0.0222999	0	0.0397314	0.0162685	0	99.9055
2010-02-13 12:30:00	NA	NA	9	NA	NA	9	911.638	0.347641	0	NA	NA	9	NA	NA	9	2.84265	0.0225828	0	NA	NA	9	NA	NA	9	3.82963	0.00359317	0	NA	NA	9	42.8811	0.0431649	0	NA	NA	9	0.0155124	0.00746265	0	NA	NA	9	0.0100527	0.0118973	0	0.0220561	0.00723711	0	67.0692
2010-02-13 13:30:00	NA	NA	9	NA	NA	9	911.386	0.312844	0	NA	NA	9	NA	NA	9	2.87859	0.0160775	0	NA	NA	9	NA	NA	9	3.83323	0.00388642	0	NA	NA	9	42.8788	0.0504843	0	NA	NA	9	0.0220622	0.00551011	0	NA	NA	9	-0.003589	0.00603174	0	0.0230634	0.00586759	0	97.6673
2010-02-13 14:30:00	NA	NA	9	NA	NA	9	911.318	0.321797	0	NA	NA	9	NA	NA	9	2.92032	0.0319508	0	NA	NA	9	NA	NA	9	3.83593	0.00409727	0	NA	NA	9	42.8574	0.0524867	0	NA	NA	9	0.0378092	0.0262449	0	NA	NA	9	-0.007394	0.0149215	0	0.0395397	0.0288482	0	95.9592
2010-02-13 15:30:00	NA	NA	9	NA	NA	9	911.874	0.361105	0	NA	NA	9	NA	NA	9	2.82466	0.0261414	0	NA	NA	9	NA	NA	9	3.82773	0.00324152	0	NA	NA	9	42.881	0.0393399	0	NA	NA	9	0.108732	0.0350138	0	NA	NA	9	-0.0317201	0.0254003	0	0.115751	0.0360726	0	105.681
2010-02-13 16:30:00	NA	NA	9	NA	NA	9	912.303	0.337583	0	NA	NA	9	NA	NA	9	2.81157	0.0114548	0	NA	NA	9	NA	NA	9	3.82719	0.0028844	0	NA	NA	9	42.8913	0.0371778	0	NA	NA	9	0.11485	0.0406424	0	NA	NA	9	-0.0360186	0.0314486	0	0.123961	0.0419746	0	106.822
2010-02-13 17:30:00	NA	NA	9	NA	NA	9	912.76	0.343826	0	NA	NA	9	NA	NA	9	2.83727	0.0132179	0	NA	NA	9	NA	NA	9	3.82918	0.002973	0	NA	NA	9	42.8819	0.0399593	0	NA	NA	9	0.119086	0.0417395	0	NA	NA	9	-0.029977	0.0277487	0	0.125759	0.0421488	0	104.145
2010-02-13 18:30:00	NA	NA	9	NA	NA	9	913.071	0.29338	0	NA	NA	9	NA	NA	9	2.86886	0.0223366	0	NA	NA	9	NA	NA	9	3.8331	0.00355704	0	NA	NA	9	42.889	0.0435704	0	NA	NA	9	0.130189	0.0450542	0	NA	NA	9	-0.0419186	0.0338899	0	0.140479	0.0463654	0	107.462
2010-02-13 19:30:00	NA	NA	9	NA	NA	9	913.284	0.314269	0	NA	NA	9	NA	NA	9	2.90444	0.0157356	0	NA	NA	9	NA	NA	9	3.8352	0.00294713	0	NA	NA	9	42.868	0.0385829	0	NA	NA	9	0.113965	0.0438131	0	NA	NA	9	-0.0248748	0.0309555	0	0.120612	0.0440095	0	102.129
2010-02-13 20:30:00	NA	NA	9	NA	NA	9	913.113	0.309012	0	NA	NA	9	NA	NA	9	2.94859	0.0203382	0	NA	NA	9	NA	NA	9	3.83838	0.0035368	0	NA	NA	9	42.8496	0.0418474	0	NA	NA	9	0.0604711	0.0314432	0	NA	NA	9	-0.00706344	0.0182709	0	0.0632314	0.0321058	0	94.6165
2010-02-13 21:30:00	NA	NA	9	NA	NA	9	912.721	0.341144	0	NA	NA	9	NA	NA	9	2.94321	0.0129057	0	NA	NA	9	NA	NA	9	3.83792	0.00373695	0	NA	NA	9	42.8512	0.0482931	0	NA	NA	9	0.027544	0.0166886	0	NA	NA	9	-0.00908975	0.0138856	0	0.0328734	0.0152258	0	119.328
2010-02-13 22:30:00	NA	NA	9	NA	NA	9	912.06	0.379249	0	NA	NA	9	NA	NA	9	2.95359	0.0129618	0	NA	NA	9	NA	NA	9	3.83941	0.00464359	0	NA	NA	9	42.8564	0.0568816	0	NA	NA	9	0.0105344	0.0116525	0	NA	NA	9	0.00528473	0.00778393	0	0.0170964	0.00654966	0	136.219
2010-02-13 23:30:00	NA	NA	9	NA	NA	9	911.411	0.330774	0	NA	NA	9	NA	NA	9	2.96428	0.0142844	0	NA	NA	9	NA	NA	9	3.84093	0.00390018	0	NA	NA	9	42.8617	0.0510399	0	NA	NA	9	0.0201336	0.00796113	0	NA	NA	9	-0.0094641	0.0058581	0	0.023578	0.0060557	0	117.861
2010-02-14 00:30:00	NA	NA	9	NA	NA	9	910.942	0.319532	0	NA	NA	9	NA	NA	9	2.92828	0.02633	0	NA	NA	9	NA	NA	9	3.83752	0.00430471	0	NA	NA	9	42.867	0.0451948	0	NA	NA	9	-0.0230506	0.0169807	0	NA	NA	9	0.00108372	0.0116058	0	0.0274283	0.0142515	0	253.546
2010-02-14 01:30:00	NA	NA	9	NA	NA	9	910.531	0.308436	0	NA	NA	9	NA	NA	9	2.89826	0.0143306	0	NA	NA	9	NA	NA	9	3.83513	0.00361844	0	NA	NA	9	42.8771	0.0488962	0	NA	NA	9	-0.00901852	0.0120322	0	NA	NA	9	-0.00111197	0.00987242	0	0.0159029	0.00847432	0	220.436
2010-02-14 02:30:00	NA	NA	9	NA	NA	9	910.197	0.287113	0	NA	NA	9	NA	NA	9	2.89861	0.0141224	0	NA	NA	9	NA	NA	9	3.83732	0.00387088	0	NA	NA	9	42.9044	0.0515872	0	NA	NA	9	0.0128507	0.00413533	0	NA	NA	9	-0.00331871	0.00439046	0	0.0141794	0.00338545	0	105.452
2010-02-14 03:30:00	NA	NA	9	NA	NA	9	910.467	0.345968	0	NA	NA	9	NA	NA	9	2.90097	0.0115386	0	NA	NA	9	NA	NA	9	3.83468	0.00388247	0	NA	NA	9	42.8678	0.0487524	0	NA	NA	9	0.0304644	0.0116772	0	NA	NA	9	-0.0143972	0.0147133	0	0.0362569	0.0131734	0	113.451
2010-02-14 04:30:00	NA	NA	9	NA	NA	9	910.818	0.391107	0	NA	NA	9	NA	NA	9	2.90849	0.0208845	0	NA	NA	9	NA	NA	9	3.83553	0.00441226	0	NA	NA	9	42.8684	0.0478858	0	NA	NA	9	0.03108	0.0167582	0	NA	NA	9	-0.00750197	0.0103301	0	0.0331329	0.0176625	0	102.053
2010-02-14 05:30:00	NA	NA	9	NA	NA	9	911.514	0.360673	0	NA	NA	9	NA	NA	9	2.90142	0.0328445	0	NA	NA	9	NA	NA	9	3.83476	0.00415548	0	NA	NA	9	42.8676	0.0436353	0	NA	NA	9	0.0474413	0.0260044	0	NA	NA	9	-0.016225	0.0251123	0	0.0560253	0.0261074	0	106.405
2010-02-14 06:30:00	NA	NA	9	NA	NA	9	911.978	0.315737	0	NA	NA	9	NA	NA	9	2.96225	0.0568606	0	NA	NA	9	NA	NA	9	3.83907	0.00535596	0	NA	NA	9	42.8409	0.049623	0	NA	NA	9	0.0486381	0.0310988	0	NA	NA	9	-0.00615606	0.0196361	0	0.0532939	0.0302621	0	99.2829
2010-02-14 07:30:00	NA	NA	9	NA	NA	9	912.507	0.325276	0	NA	NA	9	NA	NA	9	2.95577	0.0211475	0	NA	NA	9	NA	NA	9	3.83833	0.00341433	0	NA	NA	9	42.8398	0.0467263	0	NA	NA	9	0.0831966	0.0269406	0	NA	NA	9	-0.0269721	0.0246709	0	0.0900451	0.0295847	0	106.468
2010-02-14 08:30:00	NA	NA	9	NA	NA	9	912.68	0.342967	0	NA	NA	9	NA	NA	9	2.97086	0.0188685	0	NA	NA	9	NA	NA	9	3.83984	0.00379777	0	NA	NA	9	42.8387	0.0444104	0	NA	NA	9	0.0493021	0.0231345	0	NA	NA	9	-0.00313547	0.0124483	0	0.0508976	0.0232389	0	93.4095
2010-02-14 09:30:00	NA	NA	9	NA	NA	9	912.595	0.3357	0	NA	NA	9	NA	NA	9	3.00901	0.0125299	0	NA	NA	9	NA	NA	9	3.84335	0.00394239	0	NA	NA	9	42.8321	0.0503076	0	NA	NA	9	0.0172825	0.0116361	0	NA	NA	9	0.00448381	0.0110366	0	0.0208225	0.0119313	0	77.7905
2010-02-14 10:30:00	NA	NA	9	NA	NA	9	912.394	0.288571	0	NA	NA	9	NA	NA	9	2.97537	0.0293334	0	NA	NA	9	NA	NA	9	3.84019	0.00445863	0	NA	NA	9	42.8372	0.0501295	0	NA	NA	9	-0.010566	0.0223697	0	NA	NA	9	-0.00649863	0.0100401	0	0.0238519	0.0136358	0	203.574
2010-02-14 11:30:00	NA	NA	9	NA	NA	9	912.051	0.325186	0	NA	NA	9	NA	NA	9	2.94107	0.0165366	0	NA	NA	9	NA	NA	9	3.83786	0.00405228	0	NA	NA	9	42.8537	0.0514267	0	NA	NA	9	0.0122536	0.0120984	0	NA	NA	9	-0.0082371	0.00714599	0	0.0186928	0.00812049	0	132.452
2010-02-14 12:30:00	NA	NA	9	NA	NA	9	911.561	0.29242	0	NA	NA	9	NA	NA	9	2.93431	0.0138351	0	NA	NA	9	NA	NA	9	3.83717	0.00399801	0	NA	NA	9	42.8543	0.049444	0	NA	NA	9	-0.00894445	0.0177525	0	NA	NA	9	0.00803311	0.00907746	0	0.0175524	0.0152941	0	203.825
2010-02-14 13:30:00	NA	NA	9	NA	NA	9	911.444	0.326132	0	NA	NA	9	NA	NA	9	2.86544	0.0430962	0	NA	NA	9	NA	NA	9	3.83141	0.00422814	0	NA	NA	9	42.8733	0.0461311	0	NA	NA	9	-0.0369256	0.0186678	0	NA	NA	9	0.0112036	0.0113362	0	0.0403577	0.0183629	0	282.108
2010-02-14 14:30:00	NA	NA	9	NA	NA	9	911.398	0.328766	0	NA	NA	9	NA	NA	9	2.80719	0.0105579	0	NA	NA	9	NA	NA	9	3.82872	0.00368241	0	NA	NA	9	42.9169	0.0472865	0	NA	NA	9	0.00545618	0.0139942	0	NA	NA	9	-0.00424926	0.00876613	0	0.0143398	0.010714	0	187.726
2010-02-14 15:30:00	NA	NA	9	NA	NA	9	911.419	0.315855	0	NA	NA	9	NA	NA	9	2.81969	0.0139029	0	NA	NA	9	NA	NA	9	3.83229	0.00458481	0	NA	NA	9	42.9452	0.0574422	0	NA	NA	9	0.02463	0.00513842	0	NA	NA	9	-0.00582545	0.00479868	0	0.0255963	0.00590127	0	102.112
2010-02-14 16:30:00	NA	NA	9	NA	NA	9	911.794	0.377162	0	NA	NA	9	NA	NA	9	2.82603	0.0126367	0	NA	NA	9	NA	NA	9	3.83051	0.00365228	0	NA	NA	9	42.9141	0.0490669	0	NA	NA	9	0.011051	0.00747114	0	NA	NA	9	-0.00228718	0.00704906	0	0.0137365	0.00664367	0	111.311
2010-02-14 17:30:00	NA	NA	9	NA	NA	9	912.213	0.340937	0	NA	NA	9	NA	NA	9	2.83582	0.013063	0	NA	NA	9	NA	NA	9	3.83265	0.00399669	0	NA	NA	9	42.9278	0.0483171	0	NA	NA	9	0.022057	0.00662503	0	NA	NA	9	-0.00113219	0.00378242	0	0.0223733	0.00673962	0	93.3425
2010-02-14 18:30:00	NA	NA	9	NA	NA	9	912.614	0.360806	0	NA	NA	9	NA	NA	9	2.88832	0.024958	0	NA	NA	9	NA	NA	9	3.83472	0.00399318	0	NA	NA	9	42.8839	0.054132	0	NA	NA	9	0.0199692	0.00610199	0	NA	NA	9	-0.0049721	0.00758499	0	0.0216816	0.00693825	0	102.367
2010-02-14 19:30:00	NA	NA	9	NA	NA	9	912.938	0.334062	0	NA	NA	9	NA	NA	9	2.92331	0.0125924	0	NA	NA	9	NA	NA	9	3.83575	0.0035416	0	NA	NA	9	42.8501	0.0470395	0	NA	NA	9	0.0204076	0.0131336	0	NA	NA	9	0.00411352	0.0132398	0	0.0244824	0.0134795	0	80.0241
2010-02-14 20:30:00	NA	NA	9	NA	NA	9	913.046	0.311276	0	NA	NA	9	NA	NA	9	2.92629	0.012205	0	NA	NA	9	NA	NA	9	3.8363	0.00299	0	NA	NA	9	42.8531	0.0404709	0	NA	NA	9	0.0461559	0.0210667	0	NA	NA	9	0.00209137	0.013003	0	0.0480832	0.0208694	0	87.1812
2010-02-14 21:30:00	NA	NA	9	NA	NA	9	912.991	0.328481	0	NA	NA	9	NA	NA	9	2.90124	0.0493478	0	NA	NA	9	NA	NA	9	3.83528	0.00477888	0	NA	NA	9	42.8735	0.0448398	0	NA	NA	9	0.0696754	0.0341705	0	NA	NA	9	-0.020578	0.0219427	0	0.0745756	0.0369533	0	103.871
2010-02-14 22:30:00	NA	NA	9	NA	NA	9	912.685	0.358069	0	NA	NA	9	NA	NA	9	2.87322	0.034444	0	NA	NA	9	NA	NA	9	3.83336	0.00462054	0	NA	NA	9	42.8867	0.0475024	0	NA	NA	9	0.0606159	0.027792	0	NA	NA	9	-0.0273062	0.0140154	0	0.0676398	0.0285221	0	115.404
2010-02-14 23:30:00	NA	NA	9	NA	NA	9	912.046	0.32981	0	NA	NA	9	NA	NA	9	2.85275	0.0562616	0	NA	NA	9	NA	NA	9	3.83186	0.00541381	0	NA	NA	9	42.8955	0.0516619	0	NA	NA	9	0.0856099	0.0528985	0	NA	NA	9	-0.0245281	0.0291413	0	0.0917132	0.0562724	0	104.317
2010-02-15 00:30:00	NA	NA	9	NA	NA	9	911.505	0.3403	0	NA	NA	9	NA	NA	9	2.79906	0.0141719	0	NA	NA	9	NA	NA	9	3.82706	0.00316733	0	NA	NA	9	42.9067	0.0392421	0	NA	NA	9	0.123856	0.0412394	0	NA	NA	9	-0.0319989	0.0295654	0	0.131096	0.0418625	0	104.087
2010-02-15 01:30:00	NA	NA	9	NA	NA	9	910.929	0.320473	0	NA	NA	9	NA	NA	9	2.82484	0.0212002	0	NA	NA	9	NA	NA	9	3.83	0.00396394	0	NA	NA	9	42.9099	0.0485143	0	NA	NA	9	0.082347	0.0299453	0	NA	NA	9	-0.0303302	0.0279877	0	0.0905122	0.0344709	0	107.822
2010-02-15 02:30:00	NA	NA	9	NA	NA	9	910.56	0.339594	0	NA	NA	9	NA	NA	9	2.83824	0.0176867	0	NA	NA	9	NA	NA	9	3.83249	0.00395208	0	NA	NA	9	42.9236	0.0472213	0	NA	NA	9	0.0249307	0.0323676	0	NA	NA	9	-0.00979656	0.0212322	0	0.0407581	0.0235421	0	139.974
2010-02-15 03:30:00	NA	NA	9	NA	NA	9	910.529	0.327834	0	NA	NA	9	NA	NA	9	2.85712	0.0148906	0	NA	NA	9	NA	NA	9	3.83223	0.00352793	0	NA	NA	9	42.8953	0.0486291	0	NA	NA	9	-0.00406698	0.0160227	0	NA	NA	9	-0.00785853	0.0122385	0	0.0191671	0.010829	0	187.553
2010-02-15 04:30:00	NA	NA	9	NA	NA	9	910.876	0.340117	0	NA	NA	9	NA	NA	9	2.85009	0.0122506	0	NA	NA	9	NA	NA	9	3.83137	0.00347962	0	NA	NA	9	42.8935	0.0448766	0	NA	NA	9	-0.0245371	0.0149449	0	NA	NA	9	0.0154687	0.0118049	0	0.0313084	0.0149586	0	286.58
2010-02-15 05:30:00	NA	NA	9	NA	NA	9	911.442	0.349011	0	NA	NA	9	NA	NA	9	2.83916	0.0195194	0	NA	NA	9	NA	NA	9	3.83071	0.0040308	0	NA	NA	9	42.8994	0.0500385	0	NA	NA	9	-0.00952245	0.0122244	0	NA	NA	9	0.00497142	0.0106382	0	0.0171227	0.00920408	0	244.814
2010-02-15 06:30:00	NA	NA	9	NA	NA	9	912.214	0.386834	0	NA	NA	9	NA	NA	9	2.77474	0.0139019	0	NA	NA	9	NA	NA	9	3.82539	0.00296906	0	NA	NA	9	42.9176	0.0391033	0	NA	NA	9	-0.0297687	0.021701	0	NA	NA	9	-0.00646321	0.0155209	0	0.0354775	0.0195177	0	245.88
2010-02-15 07:30:00	NA	NA	9	NA	NA	9	912.879	0.319513	0	NA	NA	9	NA	NA	9	2.72948	0.0135114	0	NA	NA	9	NA	NA	9	3.82395	0.0036374	0	NA	NA	9	42.9593	0.0482277	0	NA	NA	9	1.02615e-05	0.0184639	0	NA	NA	9	-0.0126047	0.0106806	0	0.0221737	0.0110458	0	164.736
2010-02-15 08:30:00	NA	NA	9	NA	NA	9	913.141	0.319989	0	NA	NA	9	NA	NA	9	2.73441	0.0132067	0	NA	NA	9	NA	NA	9	3.82303	0.00322654	0	NA	NA	9	42.941	0.0412986	0	NA	NA	9	0.0179543	0.00770975	0	NA	NA	9	-0.011338	0.00967173	0	0.0233755	0.00757753	0	121.105
2010-02-15 09:30:00	NA	NA	9	NA	NA	9	913.206	0.319963	0	NA	NA	9	NA	NA	9	2.79529	0.0237932	0	NA	NA	9	NA	NA	9	3.82728	0.00381848	0	NA	NA	9	42.9134	0.0428798	0	NA	NA	9	0.0303249	0.0202238	0	NA	NA	9	-0.0134595	0.013703	0	0.0370622	0.0179937	0	118.71
2010-02-15 10:30:00	NA	NA	9	NA	NA	9	913.099	0.293204	0	NA	NA	9	NA	NA	9	2.738	0.0696038	0	NA	NA	9	NA	NA	9	3.82244	0.00667249	0	NA	NA	9	42.9288	0.0469809	0	NA	NA	9	0.129726	0.056293	0	NA	NA	9	-0.0322722	0.0379313	0	0.138492	0.0574221	0	102.642
2010-02-15 11:30:00	NA	NA	9	NA	NA	9	912.689	0.375073	0	NA	NA	9	NA	NA	9	2.79194	0.0168987	0	NA	NA	9	NA	NA	9	3.82701	0.00298972	0	NA	NA	9	42.9148	0.0394996	0	NA	NA	9	0.100019	0.0486584	0	NA	NA	9	-0.0167171	0.0359382	0	0.107831	0.0481055	0	98.8311
2010-02-15 12:30:00	NA	NA	9	NA	NA	9	912.007	0.357838	0	NA	NA	9	NA	NA	9	2.89817	0.0439787	0	NA	NA	9	NA	NA	9	3.83533	0.00394725	0	NA	NA	9	42.8788	0.0462821	0	NA	NA	9	0.0798911	0.046403	0	NA	NA	9	0.00545296	0.0328431	0	0.0873959	0.044783	0	86.2362
2010-02-15 13:30:00	NA	NA	9	NA	NA	9	911.497	0.3089	0	NA	NA	9	NA	NA	9	2.90637	0.0110939	0	NA	NA	9	NA	NA	9	3.83496	0.00283916	0	NA	NA	9	42.8636	0.0381882	0	NA	NA	9	0.080318	0.0372117	0	NA	NA	9	-0.00816322	0.0262944	0	0.0851861	0.0365601	0	95.3507
2010-02-15 14:30:00	NA	NA	9	NA	NA	9	911.194	0.326601	0	NA	NA	9	NA	NA	9	2.90538	0.0121814	0	NA	NA	9	NA	NA	9	3.8355	0.00319195	0	NA	NA	9	42.8719	0.0423168	0	NA	NA	9	0.0870547	0.029363	0	NA	NA	9	-0.0248356	0.0229157	0	0.0929323	0.030757	0	104.988
2010-02-15 15:30:00	NA	NA	9	NA	NA	9	911.044	0.292217	0	NA	NA	9	NA	NA	9	2.93136	0.0137656	0	NA	NA	9	NA	NA	9	3.83793	0.00382084	0	NA	NA	9	42.868	0.0468902	0	NA	NA	9	0.0411409	0.0187445	0	NA	NA	9	-0.00317774	0.0103754	0	0.042419	0.0190328	0	94.0706
2010-02-15 16:30:00	NA	NA	9	NA	NA	9	911.195	0.361302	0	NA	NA	9	NA	NA	9	2.94806	0.0108231	0	NA	NA	9	NA	NA	9	3.8395	0.00437799	0	NA	NA	9	42.8655	0.0574025	0	NA	NA	9	0.00881601	0.00711022	0	NA	NA	9	-0.00134067	0.00660819	0	0.0117368	0.00599657	0	124.324
2010-02-15 17:30:00	NA	NA	9	NA	NA	9	911.628	0.340771	0	NA	NA	9	NA	NA	9	2.93912	0.0288495	0	NA	NA	9	NA	NA	9	3.83477	0.00448428	0	NA	NA	9	42.8177	0.0505412	0	NA	NA	9	-0.00225483	0.0125367	0	NA	NA	9	0.010366	0.0184952	0	0.0169577	0.0180032	0	202.827
2010-02-15 18:30:00	NA	NA	9	NA	NA	9	912.404	0.339422	0	NA	NA	9	NA	NA	9	2.8325	0.0201544	0	NA	NA	9	NA	NA	9	3.82829	0.00367253	0	NA	NA	9	42.8772	0.0513308	0	NA	NA	9	0.00178995	0.0151267	0	NA	NA	9	-0.00750983	0.0140123	0	0.0196479	0.00992672	0	186.826
2010-02-15 19:30:00	NA	NA	9	NA	NA	9	912.888	0.303819	0	NA	NA	9	NA	NA	9	2.81031	0.0115148	0	NA	NA	9	NA	NA	9	3.82828	0.00376654	0	NA	NA	9	42.9063	0.048353	0	NA	NA	9	0.00435765	0.00794741	0	NA	NA	9	0.0164802	0.0109418	0	0.0201746	0.00814791	0	148.869
2010-02-15 20:30:00	NA	NA	9	NA	NA	9	913.084	0.338241	0	NA	NA	9	NA	NA	9	2.79768	0.0157672	0	NA	NA	9	NA	NA	9	3.82626	0.00424623	0	NA	NA	9	42.8975	0.0525629	0	NA	NA	9	0.0114015	0.00860887	0	NA	NA	9	-0.00701617	0.00934507	0	0.0161095	0.00900565	0	123.71
2010-02-15 21:30:00	NA	NA	9	NA	NA	9	913.1	0.352131	0	NA	NA	9	NA	NA	9	2.79425	0.0135189	0	NA	NA	9	NA	NA	9	3.82654	0.00405944	0	NA	NA	9	42.9056	0.0530253	0	NA	NA	9	0.0147957	0.00472413	0	NA	NA	9	-0.00052028	0.0053341	0	0.0158498	0.00432666	0	89.5933
2010-02-15 22:30:00	NA	NA	9	NA	NA	9	912.812	0.296077	0	NA	NA	9	NA	NA	9	2.80093	0.00998144	0	NA	NA	9	NA	NA	9	3.82537	0.00402289	0	NA	NA	9	42.8822	0.051333	0	NA	NA	9	0.00545053	0.00685968	0	NA	NA	9	0.00943844	0.0100953	0	0.0153195	0.00574567	0	119.931
2010-02-15 23:30:00	NA	NA	9	NA	NA	9	912.266	0.354828	0	NA	NA	9	NA	NA	9	2.79684	0.0117524	0	NA	NA	9	NA	NA	9	3.82573	0.004023	0	NA	NA	9	42.8925	0.0507145	0	NA	NA	9	0.00925134	0.00411298	0	NA	NA	9	-0.00198932	0.00345724	0	0.0100141	0.00425753	0	101.578
2010-02-16 00:30:00	NA	NA	9	NA	NA	9	911.699	0.350502	0	NA	NA	9	NA	NA	9	2.79696	0.012959	0	NA	NA	9	NA	NA	9	3.82529	0.00348367	0	NA	NA	9	42.8872	0.0471682	0	NA	NA	9	0.0199318	0.00228234	0	NA	NA	9	-0.0108918	0.00402254	0	0.0229753	0.00307042	0	118.012
2010-02-16 01:30:00	NA	NA	9	NA	NA	9	911.073	0.342039	0	NA	NA	9	NA	NA	9	2.80671	0.0142652	0	NA	NA	9	NA	NA	9	3.82666	0.00429438	0	NA	NA	9	42.8918	0.0556613	0	NA	NA	9	0.0185682	0.00312732	0	NA	NA	9	-0.00567188	0.0040184	0	0.0197393	0.00363701	0	106.099
2010-02-16 02:30:00	NA	NA	9	NA	NA	9	910.675	0.330966	0	NA	NA	9	NA	NA	9	2.81384	0.0134531	0	NA	NA	9	NA	NA	9	3.82572	0.00349981	0	NA	NA	9	42.8707	0.0440621	0	NA	NA	9	0.0172612	0.00846993	0	NA	NA	9	-0.00594883	0.00371331	0	0.0191283	0.00727702	0	114.257
2010-02-16 03:30:00	NA	NA	9	NA	NA	9	910.616	0.346381	0	NA	NA	9	NA	NA	9	2.80067	0.0567632	0	NA	NA	9	NA	NA	9	3.8271	0.00792007	0	NA	NA	9	42.9056	0.0525096	0	NA	NA	9	0.0109636	0.00842681	0	NA	NA	9	-0.00640674	0.00686024	0	0.0162182	0.00402906	0	125.939
2010-02-16 04:30:00	NA	NA	9	NA	NA	9	910.827	0.353496	0	NA	NA	9	NA	NA	9	2.79015	0.0237817	0	NA	NA	9	NA	NA	9	3.82389	0.00363485	0	NA	NA	9	42.8792	0.044265	0	NA	NA	9	0.0580741	0.036577	0	NA	NA	9	-0.0582535	0.0408954	0	0.0839098	0.0523009	0	129.71
2010-02-16 05:30:00	NA	NA	9	NA	NA	9	911.375	0.34631	0	NA	NA	9	NA	NA	9	2.77346	0.0282322	0	NA	NA	9	NA	NA	9	3.82355	0.00370584	0	NA	NA	9	42.8967	0.0433983	0	NA	NA	9	0.118029	0.0206467	0	NA	NA	9	-0.117819	0.0295932	0	0.167757	0.0311683	0	134.452
2010-02-16 06:30:00	NA	NA	9	NA	NA	9	911.971	0.344621	0	NA	NA	9	NA	NA	9	2.80286	0.0196851	0	NA	NA	9	NA	NA	9	3.82658	0.00322548	0	NA	NA	9	42.8953	0.0384482	0	NA	NA	9	0.160953	0.0225375	0	NA	NA	9	-0.182496	0.0209705	0	0.24385	0.0263713	0	138.661
2010-02-16 07:30:00	NA	NA	9	NA	NA	9	912.49	0.374452	0	NA	NA	9	NA	NA	9	2.8431	0.0178888	0	NA	NA	9	NA	NA	9	3.82946	0.00340235	0	NA	NA	9	42.8778	0.0460744	0	NA	NA	9	0.143532	0.0184037	0	NA	NA	9	-0.159252	0.0191358	0	0.214795	0.0230252	0	137.98
2010-02-16 08:30:00	NA	NA	9	NA	NA	9	912.958	0.310612	0	NA	NA	9	NA	NA	9	2.84636	0.0240216	0	NA	NA	9	NA	NA	9	3.82981	0.00347318	0	NA	NA	9	42.8777	0.0478959	0	NA	NA	9	0.119098	0.0268146	0	NA	NA	9	-0.137359	0.0222513	0	0.182508	0.0309303	0	139.367
2010-02-16 09:30:00	NA	NA	9	NA	NA	9	913.108	0.318778	0	NA	NA	9	NA	NA	9	2.86796	0.0382357	0	NA	NA	9	NA	NA	9	3.83075	0.0042589	0	NA	NA	9	42.8607	0.0427048	0	NA	NA	9	0.091541	0.0423075	0	NA	NA	9	-0.0664445	0.0420248	0	0.117674	0.0500281	0	124.9
2010-02-16 10:30:00	NA	NA	9	NA	NA	9	913.109	0.304817	0	NA	NA	9	NA	NA	9	2.82963	0.0157587	0	NA	NA	9	NA	NA	9	3.82856	0.00316234	0	NA	NA	9	42.8839	0.0401882	0	NA	NA	9	0.0671715	0.03289	0	NA	NA	9	-0.0649776	0.0295069	0	0.0950008	0.0407578	0	134.411
2010-02-16 11:30:00	NA	NA	9	NA	NA	9	912.542	0.378847	0	NA	NA	9	NA	NA	9	2.92245	0.0192594	0	NA	NA	9	NA	NA	9	3.83422	0.0035017	0	NA	NA	9	42.8323	0.0461888	0	NA	NA	9	0.0148714	0.0209505	0	NA	NA	9	0.00112507	0.0295624	0	0.0354818	0.0166057	0	180.518
2010-02-16 12:30:00	NA	NA	9	NA	NA	9	912.026	0.321652	0	NA	NA	9	NA	NA	9	2.90681	0.0218837	0	NA	NA	9	NA	NA	9	3.83242	0.00374591	0	NA	NA	9	42.8309	0.042882	0	NA	NA	9	-0.0270093	0.0295279	0	NA	NA	9	0.0294087	0.024642	0	0.0444243	0.0331628	0	252.982
2010-02-16 13:30:00	NA	NA	9	NA	NA	9	911.808	0.33896	0	NA	NA	9	NA	NA	9	2.78428	0.0305651	0	NA	NA	9	NA	NA	9	3.82312	0.00348879	0	NA	NA	9	42.8766	0.0410545	0	NA	NA	9	-0.0440264	0.0196264	0	NA	NA	9	0.0607488	0.0153871	0	0.0762339	0.0209521	0	324.508
2010-02-16 14:30:00	NA	NA	9	NA	NA	9	911.354	0.329444	0	NA	NA	9	NA	NA	9	2.78163	0.0113053	0	NA	NA	9	NA	NA	9	3.82537	0.00369356	0	NA	NA	9	42.9088	0.046481	0	NA	NA	9	-0.00335101	0.0198361	0	NA	NA	9	0.0216979	0.0247047	0	0.0315804	0.0220956	0	207.523
2010-02-16 15:30:00	NA	NA	9	NA	NA	9	911.187	0.335114	0	NA	NA	9	NA	NA	9	2.76939	0.0137622	0	NA	NA	9	NA	NA	9	3.82445	0.00360701	0	NA	NA	9	42.9135	0.0485183	0	NA	NA	9	0.0115281	0.00804323	0	NA	NA	9	-0.00983293	0.00598848	0	0.0164426	0.00773029	0	135.981
2010-02-16 16:30:00	NA	NA	9	NA	NA	9	911.141	0.30696	0	NA	NA	9	NA	NA	9	2.78297	0.0170112	0	NA	NA	9	NA	NA	9	3.82669	0.00428025	0	NA	NA	9	42.9237	0.0518197	0	NA	NA	9	0.0161696	0.00245734	0	NA	NA	9	-0.00336818	0.00470476	0	0.0170174	0.00337229	0	99.9196
2010-02-16 17:30:00	NA	NA	9	NA	NA	9	911.438	0.286902	0	NA	NA	9	NA	NA	9	2.78048	0.0112003	0	NA	NA	9	NA	NA	9	3.82394	0.00385894	0	NA	NA	9	42.8923	0.0504551	0	NA	NA	9	0.0174185	0.0028345	0	NA	NA	9	-0.0030917	0.00401232	0	0.0180637	0.00328489	0	99.0703
2010-02-16 18:30:00	NA	NA	9	NA	NA	9	912.1	0.36047	0	NA	NA	9	NA	NA	9	2.78019	0.0170835	0	NA	NA	9	NA	NA	9	3.82432	0.00360671	0	NA	NA	9	42.897	0.0458798	0	NA	NA	9	0.0523143	0.0176426	0	NA	NA	9	-0.0401969	0.0248549	0	0.0667646	0.028706	0	124.807
2010-02-16 19:30:00	NA	NA	9	NA	NA	9	912.557	0.341057	0	NA	NA	9	NA	NA	9	2.83214	0.0334684	0	NA	NA	9	NA	NA	9	3.82828	0.00388819	0	NA	NA	9	42.8775	0.0447575	0	NA	NA	9	0.112281	0.0261067	0	NA	NA	9	-0.133989	0.0272511	0	0.175553	0.0341353	0	140.161
2010-02-16 20:30:00	NA	NA	9	NA	NA	9	912.918	0.330055	0	NA	NA	9	NA	NA	9	2.87915	0.0244926	0	NA	NA	9	NA	NA	9	3.83178	0.00353807	0	NA	NA	9	42.8589	0.04389	0	NA	NA	9	0.104495	0.0237855	0	NA	NA	9	-0.128284	0.0255695	0	0.166523	0.0294206	0	140.824
2010-02-16 21:30:00	NA	NA	9	NA	NA	9	912.982	0.309783	0	NA	NA	9	NA	NA	9	2.88741	0.0140581	0	NA	NA	9	NA	NA	9	3.83234	0.00313304	0	NA	NA	9	42.8549	0.0430093	0	NA	NA	9	0.123669	0.0206096	0	NA	NA	9	-0.127678	0.0203047	0	0.178345	0.0250133	0	135.948
2010-02-16 22:30:00	NA	NA	9	NA	NA	9	912.881	0.314351	0	NA	NA	9	NA	NA	9	2.89382	0.0218121	0	NA	NA	9	NA	NA	9	3.83266	0.00320416	0	NA	NA	9	42.8505	0.0396568	0	NA	NA	9	0.113831	0.0218894	0	NA	NA	9	-0.126206	0.0202885	0	0.170643	0.0256345	0	138.074
2010-02-16 23:30:00	NA	NA	9	NA	NA	9	912.618	0.318025	0	NA	NA	9	NA	NA	9	2.81554	0.0338226	0	NA	NA	9	NA	NA	9	3.82699	0.00359339	0	NA	NA	9	42.8833	0.0464826	0	NA	NA	9	0.123592	0.0254078	0	NA	NA	9	-0.122556	0.0335642	0	0.175059	0.0376988	0	134.117
2010-02-17 00:30:00	NA	NA	9	NA	NA	9	911.995	0.380501	0	NA	NA	9	NA	NA	9	2.86948	0.0278636	0	NA	NA	9	NA	NA	9	3.83087	0.00402095	0	NA	NA	9	42.8608	0.0490606	0	NA	NA	9	0.0441259	0.0333125	0	NA	NA	9	-0.0190815	0.0291348	0	0.0542137	0.036473	0	114.599
2010-02-17 01:30:00	NA	NA	9	NA	NA	9	911.271	0.352669	0	NA	NA	9	NA	NA	9	2.90078	0.0167544	0	NA	NA	9	NA	NA	9	3.83301	0.00387835	0	NA	NA	9	42.8467	0.0453433	0	NA	NA	9	0.00242922	0.0151883	0	NA	NA	9	0.017817	0.0184055	0	0.0253911	0.0157451	0	174.907
2010-02-17 02:30:00	NA	NA	9	NA	NA	9	910.878	0.311592	0	NA	NA	9	NA	NA	9	2.90049	0.0536856	0	NA	NA	9	NA	NA	9	3.83201	0.00475422	0	NA	NA	9	42.8348	0.0470139	0	NA	NA	9	-0.0285193	0.0272995	0	NA	NA	9	0.0160732	0.0235827	0	0.0412128	0.0259665	0	261.518
2010-02-17 03:30:00	NA	NA	9	NA	NA	9	910.767	0.315906	0	NA	NA	9	NA	NA	9	2.82586	0.0141788	0	NA	NA	9	NA	NA	9	3.82691	0.00315185	0	NA	NA	9	42.8698	0.042022	0	NA	NA	9	-0.0183336	0.0181424	0	NA	NA	9	0.0427939	0.0186468	0	0.049596	0.0196051	0	280.27
2010-02-17 04:30:00	NA	NA	9	NA	NA	9	910.937	0.347159	0	NA	NA	9	NA	NA	9	2.7801	0.0254845	0	NA	NA	9	NA	NA	9	3.82407	0.00367984	0	NA	NA	9	42.8947	0.0452249	0	NA	NA	9	-0.0328087	0.0225044	0	NA	NA	9	0.0484554	0.0300156	0	0.062107	0.0312123	0	301.63
2010-02-17 05:30:00	NA	NA	9	NA	NA	9	911.271	0.347436	0	NA	NA	9	NA	NA	9	2.75092	0.0120327	0	NA	NA	9	NA	NA	9	3.82266	0.0035333	0	NA	NA	9	42.9155	0.045051	0	NA	NA	9	-0.0086367	0.0176657	0	NA	NA	9	0.0372132	0.0254274	0	0.0428398	0.0241369	0	236.394
2010-02-17 06:30:00	NA	NA	9	NA	NA	9	911.825	0.354126	0	NA	NA	9	NA	NA	9	2.75239	0.011048	0	NA	NA	9	NA	NA	9	3.82335	0.00376659	0	NA	NA	9	42.9219	0.0480509	0	NA	NA	9	0.0026969	0.0128985	0	NA	NA	9	0.0247608	0.0201852	0	0.0303363	0.0165448	0	171.128
2010-02-17 07:30:00	NA	NA	9	NA	NA	9	912.399	0.383611	0	NA	NA	9	NA	NA	9	2.72737	0.026619	0	NA	NA	9	NA	NA	9	3.82206	0.00483718	0	NA	NA	9	42.9386	0.0563642	0	NA	NA	9	4.77802e-05	0.00953076	0	NA	NA	9	0.0199582	0.0165863	0	0.0237599	0.0141297	0	184.68
2010-02-17 08:30:00	NA	NA	9	NA	NA	9	913.003	0.343621	0	NA	NA	9	NA	NA	9	2.73633	0.02983	0	NA	NA	9	NA	NA	9	3.8228	0.00431803	0	NA	NA	9	42.9356	0.050211	0	NA	NA	9	-0.00411659	0.0112813	0	NA	NA	9	-0.0491253	0.0192057	0	0.0503694	0.0197291	0	182.589
2010-02-17 09:30:00	NA	NA	9	NA	NA	9	913.171	0.307061	0	NA	NA	9	NA	NA	9	2.81413	0.0195763	0	NA	NA	9	NA	NA	9	3.82806	0.00374884	0	NA	NA	9	42.8982	0.0451015	0	NA	NA	9	-0.00933909	0.011082	0	NA	NA	9	-0.0597049	0.0312857	0	0.0634474	0.0269763	0	191.56
2010-02-17 10:30:00	NA	NA	9	NA	NA	9	913.153	0.311301	0	NA	NA	9	NA	NA	9	2.88317	0.0421593	0	NA	NA	9	NA	NA	9	3.83313	0.00434728	0	NA	NA	9	42.8704	0.0445695	0	NA	NA	9	0.028892	0.0242168	0	NA	NA	9	-0.0341501	0.0445412	0	0.05643	0.0372336	0	144.108
2010-02-17 11:30:00	NA	NA	9	NA	NA	9	913.06	0.333471	0	NA	NA	9	NA	NA	9	2.8514	0.0176947	0	NA	NA	9	NA	NA	9	3.8304	0.00299622	0	NA	NA	9	42.8783	0.0392657	0	NA	NA	9	0.046817	0.0239099	0	NA	NA	9	-0.116425	0.024625	0	0.127467	0.0260126	0	158.634
2010-02-17 12:30:00	NA	NA	9	NA	NA	9	912.644	0.333069	0	NA	NA	9	NA	NA	9	2.82163	0.0275657	0	NA	NA	9	NA	NA	9	3.82844	0.00364932	0	NA	NA	9	42.8934	0.0426831	0	NA	NA	9	0.0366899	0.0164947	0	NA	NA	9	-0.118479	0.0254274	0	0.12485	0.0267262	0	162.985
2010-02-17 13:30:00	NA	NA	9	NA	NA	9	912.166	0.35472	0	NA	NA	9	NA	NA	9	2.76992	0.0174737	0	NA	NA	9	NA	NA	9	3.82457	0.00327539	0	NA	NA	9	42.9138	0.0411695	0	NA	NA	9	0.0489336	0.0211901	0	NA	NA	9	-0.144731	0.0210533	0	0.154112	0.0219785	0	161.469
2010-02-17 14:30:00	NA	NA	9	NA	NA	9	911.649	0.331486	0	NA	NA	9	NA	NA	9	2.77142	0.0182466	0	NA	NA	9	NA	NA	9	3.82469	0.0031065	0	NA	NA	9	42.9136	0.0413208	0	NA	NA	9	0.0615957	0.025556	0	NA	NA	9	-0.100083	0.0328628	0	0.11969	0.0348967	0	147.877
2010-02-17 15:30:00	NA	NA	9	NA	NA	9	911.207	0.307174	0	NA	NA	9	NA	NA	9	2.81313	0.0167433	0	NA	NA	9	NA	NA	9	3.82753	0.00303347	0	NA	NA	9	42.8942	0.0423431	0	NA	NA	9	0.0509993	0.0220213	0	NA	NA	9	-0.0682024	0.0260962	0	0.0864769	0.0306602	0	143.382
2010-02-17 16:30:00	NA	NA	9	NA	NA	9	911.071	0.310918	0	NA	NA	9	NA	NA	9	2.85337	0.0144537	0	NA	NA	9	NA	NA	9	3.83062	0.00335595	0	NA	NA	9	42.8797	0.0434568	0	NA	NA	9	0.0348041	0.0202544	0	NA	NA	9	-0.0213023	0.0233448	0	0.0442545	0.0257237	0	113.404
2010-02-17 17:30:00	NA	NA	9	NA	NA	9	911.206	0.319368	0	NA	NA	9	NA	NA	9	2.85324	0.0193251	0	NA	NA	9	NA	NA	9	3.83116	0.00436446	0	NA	NA	9	42.8865	0.0489346	0	NA	NA	9	0.00161234	0.0171625	0	NA	NA	9	0.00632849	0.00975928	0	0.0189275	0.00860343	0	176.24
2010-02-17 18:30:00	NA	NA	9	NA	NA	9	911.635	0.380112	0	NA	NA	9	NA	NA	9	2.83121	0.014007	0	NA	NA	9	NA	NA	9	3.829	0.00385776	0	NA	NA	9	42.8884	0.046183	0	NA	NA	9	0.00757725	0.00800302	0	NA	NA	9	0.0079407	0.00924405	0	0.0149961	0.00671031	0	102.504
2010-02-17 19:30:00	NA	NA	9	NA	NA	9	912.242	0.337946	0	NA	NA	9	NA	NA	9	2.79958	0.0107109	0	NA	NA	9	NA	NA	9	3.8261	0.00302363	0	NA	NA	9	42.8935	0.0399126	0	NA	NA	9	-0.00545542	0.0148105	0	NA	NA	9	0.0221108	0.0173567	0	0.0282494	0.0155266	0	222.463
2010-02-17 20:30:00	NA	NA	9	NA	NA	9	912.677	0.365106	0	NA	NA	9	NA	NA	9	2.79004	0.0119685	0	NA	NA	9	NA	NA	9	3.82597	0.00346577	0	NA	NA	9	42.9042	0.0463641	0	NA	NA	9	0.0122285	0.0204957	0	NA	NA	9	-0.0142473	0.0198701	0	0.0289349	0.0181638	0	176.912
2010-02-17 21:30:00	NA	NA	9	NA	NA	9	912.931	0.313909	0	NA	NA	9	NA	NA	9	2.8087	0.019769	0	NA	NA	9	NA	NA	9	3.82842	0.00478206	0	NA	NA	9	42.9102	0.0496207	0	NA	NA	9	0.0280134	0.0100901	0	NA	NA	9	-0.0225231	0.0167812	0	0.0370849	0.017324	0	121.143
2010-02-17 22:30:00	NA	NA	9	NA	NA	9	913.032	0.304165	0	NA	NA	9	NA	NA	9	2.82218	0.033101	0	NA	NA	9	NA	NA	9	3.82766	0.00417363	0	NA	NA	9	42.8827	0.0485468	0	NA	NA	9	0.00860892	0.0197359	0	NA	NA	9	0.0248244	0.0348238	0	0.0446812	0.0171881	0	216.116
2010-02-17 23:30:00	NA	NA	9	NA	NA	9	912.866	0.306844	0	NA	NA	9	NA	NA	9	2.76928	0.0163967	0	NA	NA	9	NA	NA	9	3.82369	0.00339962	0	NA	NA	9	42.9031	0.0431569	0	NA	NA	9	-0.00244129	0.00957633	0	NA	NA	9	0.0240711	0.0108188	0	0.0261984	0.0103787	0	184.745
2010-02-18 00:30:00	NA	NA	9	NA	NA	9	912.515	0.338847	0	NA	NA	9	NA	NA	9	2.74077	0.0137099	0	NA	NA	9	NA	NA	9	3.82393	0.00360832	0	NA	NA	9	42.9443	0.048682	0	NA	NA	9	0.0138147	0.00665513	0	NA	NA	9	0.00326274	0.0148346	0	0.020477	0.00681323	0	74.5292
2010-02-18 01:30:00	NA	NA	9	NA	NA	9	911.868	0.406941	0	NA	NA	9	NA	NA	9	2.76025	0.0189171	0	NA	NA	9	NA	NA	9	3.82379	0.00379012	0	NA	NA	9	42.917	0.0449969	0	NA	NA	9	0.0180872	0.00292901	0	NA	NA	9	-0.007855	0.00810092	0	0.0209662	0.00484187	0	110.325
2010-02-18 02:30:00	NA	NA	9	NA	NA	9	911.495	0.330023	0	NA	NA	9	NA	NA	9	2.75081	0.0369887	0	NA	NA	9	NA	NA	9	3.82169	0.00520459	0	NA	NA	9	42.9033	0.0461502	0	NA	NA	9	0.000576027	0.0119737	0	NA	NA	9	0.0162758	0.0200794	0	0.022378	0.0176318	0	191.561
2010-02-18 03:30:00	NA	NA	9	NA	NA	9	911.332	0.33385	0	NA	NA	9	NA	NA	9	2.70293	0.0129409	0	NA	NA	9	NA	NA	9	3.81828	0.00335267	0	NA	NA	9	42.9241	0.0452836	0	NA	NA	9	0.0132428	0.014803	0	NA	NA	9	-0.0064579	0.0180314	0	0.0237688	0.0140066	0	146.567
2010-02-18 04:30:00	NA	NA	9	NA	NA	9	911.289	0.303683	0	NA	NA	9	NA	NA	9	2.73708	0.0234252	0	NA	NA	9	NA	NA	9	3.82039	0.00324391	0	NA	NA	9	42.9053	0.0443513	0	NA	NA	9	0.0629104	0.0214404	0	NA	NA	9	-0.0928709	0.0454974	0	0.113856	0.0463584	0	141.717
2010-02-18 05:30:00	NA	NA	9	NA	NA	9	911.471	0.345876	0	NA	NA	9	NA	NA	9	2.71102	0.0108944	0	NA	NA	9	NA	NA	9	3.81925	0.00282679	0	NA	NA	9	42.9256	0.0385491	0	NA	NA	9	0.0839979	0.0172623	0	NA	NA	9	-0.139243	0.0195439	0	0.163168	0.0223671	0	148.984
2010-02-18 06:30:00	NA	NA	9	NA	NA	9	911.844	0.321448	0	NA	NA	9	NA	NA	9	2.73184	0.0197654	0	NA	NA	9	NA	NA	9	3.82088	0.0037192	0	NA	NA	9	42.9182	0.0445127	0	NA	NA	9	0.0545011	0.0191916	0	NA	NA	9	-0.114032	0.0230359	0	0.127455	0.0250508	0	154.636
2010-02-18 07:30:00	NA	NA	9	NA	NA	9	912.391	0.343978	0	NA	NA	9	NA	NA	9	2.78434	0.016457	0	NA	NA	9	NA	NA	9	3.82554	0.00310328	0	NA	NA	9	42.9066	0.0378933	0	NA	NA	9	0.0653955	0.016635	0	NA	NA	9	-0.105224	0.0185664	0	0.124669	0.0206807	0	148.213
2010-02-18 08:30:00	NA	NA	9	NA	NA	9	912.904	0.319162	0	NA	NA	9	NA	NA	9	2.8098	0.01476	0	NA	NA	9	NA	NA	9	3.82682	0.00313226	0	NA	NA	9	42.8886	0.0416839	0	NA	NA	9	0.0586878	0.0124008	0	NA	NA	9	-0.0706171	0.0189342	0	0.0925933	0.019228	0	139.698
2010-02-18 09:30:00	NA	NA	9	NA	NA	9	913.265	0.324821	0	NA	NA	9	NA	NA	9	2.81558	0.0122464	0	NA	NA	9	NA	NA	9	3.82729	0.00301535	0	NA	NA	9	42.8866	0.0394852	0	NA	NA	9	0.067719	0.0169013	0	NA	NA	9	-0.0790739	0.0296829	0	0.105699	0.0288588	0	137.804
2010-02-18 10:30:00	NA	NA	9	NA	NA	9	913.398	0.349471	0	NA	NA	9	NA	NA	9	2.82376	0.0156001	0	NA	NA	9	NA	NA	9	3.82812	0.00306652	0	NA	NA	9	42.8861	0.0413995	0	NA	NA	9	0.0516672	0.0176859	0	NA	NA	9	-0.0717936	0.0139995	0	0.0895946	0.017473	0	144.816
2010-02-18 11:30:00	NA	NA	9	NA	NA	9	913.209	0.350099	0	NA	NA	9	NA	NA	9	2.8228	0.0168386	0	NA	NA	9	NA	NA	9	3.82797	0.00327098	0	NA	NA	9	42.8856	0.0445648	0	NA	NA	9	0.0532637	0.0185892	0	NA	NA	9	-0.0437415	0.0214822	0	0.0706457	0.0237999	0	127.505
2010-02-18 12:30:00	NA	NA	9	NA	NA	9	912.896	0.336585	0	NA	NA	9	NA	NA	9	2.8175	0.0198346	0	NA	NA	9	NA	NA	9	3.82987	0.00363716	0	NA	NA	9	42.9167	0.0509354	0	NA	NA	9	0.0116037	0.0121102	0	NA	NA	9	-0.0236159	0.0102324	0	0.0275349	0.0136202	0	158.342
2010-02-18 13:30:00	NA	NA	9	NA	NA	9	912.296	0.376582	0	NA	NA	9	NA	NA	9	2.82449	0.0165127	0	NA	NA	9	NA	NA	9	3.82962	0.00351256	0	NA	NA	9	42.9047	0.0471579	0	NA	NA	9	0.00792677	0.00831373	0	NA	NA	9	0.00369456	0.00951826	0	0.0141617	0.00596467	0	131.065
2010-02-18 14:30:00	NA	NA	9	NA	NA	9	911.89	0.349248	0	NA	NA	9	NA	NA	9	2.80247	0.0177602	0	NA	NA	9	NA	NA	9	3.8255	0.00299504	0	NA	NA	9	42.8823	0.0391917	0	NA	NA	9	-0.0101684	0.017703	0	NA	NA	9	0.0262277	0.0157663	0	0.0332558	0.0157206	0	213.343
2010-02-18 15:30:00	NA	NA	9	NA	NA	9	911.607	0.341228	0	NA	NA	9	NA	NA	9	2.72282	0.0117983	0	NA	NA	9	NA	NA	9	3.8206	0.00338416	0	NA	NA	9	42.9267	0.044635	0	NA	NA	9	-0.0088074	0.0161596	0	NA	NA	9	0.0455089	0.0211642	0	0.0493037	0.0206562	0	236.72
2010-02-18 16:30:00	NA	NA	9	NA	NA	9	911.119	0.358438	0	NA	NA	9	NA	NA	9	2.70172	0.0157205	0	NA	NA	9	NA	NA	9	3.82032	0.0039807	0	NA	NA	9	42.9517	0.046999	0	NA	NA	9	0.00322265	0.00889868	0	NA	NA	9	0.0228035	0.0168959	0	0.0263787	0.0141107	0	140.245
2010-02-18 17:30:00	NA	NA	9	NA	NA	9	910.986	0.343532	0	NA	NA	9	NA	NA	9	2.71261	0.0134889	0	NA	NA	9	NA	NA	9	3.82003	0.0039565	0	NA	NA	9	42.9335	0.0461994	0	NA	NA	9	0.0151905	0.00899785	0	NA	NA	9	0.000573596	0.00604813	0	0.0167489	0.00825027	0	93.8841
2010-02-18 18:30:00	NA	NA	9	NA	NA	9	911.403	0.314939	0	NA	NA	9	NA	NA	9	2.71778	0.0237466	0	NA	NA	9	NA	NA	9	3.82006	0.0036424	0	NA	NA	9	42.9267	0.0416168	0	NA	NA	9	-0.00298435	0.0243892	0	NA	NA	9	-0.0129525	0.0378751	0	0.0350797	0.0312227	0	185.507
2010-02-18 19:30:00	NA	NA	9	NA	NA	9	911.878	0.36892	0	NA	NA	9	NA	NA	9	2.69768	0.0167957	0	NA	NA	9	NA	NA	9	3.81776	0.00333579	0	NA	NA	9	42.9242	0.0423059	0	NA	NA	9	0.0260385	0.0216552	0	NA	NA	9	-0.105715	0.026454	0	0.111022	0.026384	0	165.835
2010-02-18 20:30:00	NA	NA	9	NA	NA	9	912.306	0.305497	0	NA	NA	9	NA	NA	9	2.72625	0.0260758	0	NA	NA	9	NA	NA	9	3.82056	0.00405402	0	NA	NA	9	42.9213	0.0456148	0	NA	NA	9	0.0111378	0.0199362	0	NA	NA	9	-0.149463	0.0240399	0	0.151206	0.0239829	0	175.894
2010-02-18 21:30:00	NA	NA	9	NA	NA	9	912.35	0.317421	0	NA	NA	9	NA	NA	9	2.86287	0.0148142	0	NA	NA	9	NA	NA	9	3.83172	0.00302082	0	NA	NA	9	42.8801	0.0388939	0	NA	NA	9	0.0145394	0.0131816	0	NA	NA	9	-0.144115	0.0259965	0	0.145436	0.0260479	0	174.246
2010-02-18 22:30:00	NA	NA	9	NA	NA	9	912.518	0.273156	0	NA	NA	9	NA	NA	9	2.86501	0.0126307	0	NA	NA	3	NA	NA	9	3.83192	0.00300567	0	NA	NA	9	42.8796	0.0395196	0	NA	NA	9	0.00446613	0.0192008	0	NA	NA	9	-0.163021	0.0241286	0	0.164208	0.024132	0	178.57
2010-02-18 23:30:00	NA	NA	9	NA	NA	9	912.523	0.317191	0	NA	NA	9	NA	NA	9	2.87212	0.0162747	0	3.71943	0.00255482	1	NA	NA	9	3.83245	0.00318582	0	NA	NA	9	42.8768	0.0424771	0	NA	NA	9	0.0162471	0.0224367	0	NA	NA	9	-0.0988397	0.0313386	0	0.103124	0.0297286	0	169.205
2010-02-19 00:30:00	NA	NA	9	NA	NA	9	912.199	0.368641	0	NA	NA	9	NA	NA	9	2.89297	0.012713	0	NA	NA	9	NA	NA	9	3.83317	0.00330628	0	NA	NA	9	42.8584	0.0447956	0	NA	NA	9	-0.00789471	0.0149484	0	NA	NA	9	-0.013036	0.0188241	0	0.0229316	0.0168536	0	215.382
2010-02-19 01:30:00	NA	NA	9	NA	NA	9	911.834	0.33503	0	NA	NA	9	NA	NA	9	2.86054	0.0272327	0	NA	NA	9	NA	NA	9	3.83093	0.00361999	0	NA	NA	9	42.8736	0.0442273	0	NA	NA	9	-0.0118441	0.0107606	0	NA	NA	9	0.0169086	0.0166436	0	0.0235901	0.0161994	0	291.94
2010-02-19 02:30:00	NA	NA	9	NA	NA	9	911.528	0.326699	0	NA	NA	9	NA	NA	9	2.82657	0.031299	0	NA	NA	9	NA	NA	9	3.82859	0.00406235	0	NA	NA	9	42.8895	0.0402508	0	NA	NA	9	-0.0240412	0.015315	0	NA	NA	9	0.0825321	0.0365824	0	0.0867788	0.0378379	0	318.224
2010-02-19 03:30:00	NA	NA	9	NA	NA	9	911.308	0.289282	0	NA	NA	9	NA	NA	9	2.75626	0.0172056	0	NA	NA	9	NA	NA	9	3.82305	0.00319571	0	NA	NA	9	42.9133	0.0410731	0	NA	NA	9	-0.0343475	0.0118026	0	NA	NA	9	0.0916643	0.0161033	0	0.0984081	0.017219	0	339.471
2010-02-19 04:30:00	NA	NA	9	NA	NA	9	911.279	0.328423	0	NA	NA	9	NA	NA	9	2.69772	0.0135861	0	NA	NA	9	NA	NA	9	3.81861	0.00326159	0	NA	NA	9	42.9353	0.0425669	0	NA	NA	9	-0.0194644	0.020957	0	NA	NA	9	0.0588988	0.0217552	0	0.064559	0.0243391	0	274.065
2010-02-19 05:30:00	NA	NA	9	NA	NA	9	911.344	0.269809	0	NA	NA	9	NA	NA	9	2.68212	0.0130172	0	NA	NA	9	NA	NA	9	3.81802	0.00323024	0	NA	NA	9	42.9486	0.0427538	0	NA	NA	9	0.0231896	0.0122466	0	NA	NA	9	0.0233178	0.0214626	0	0.0378949	0.0159962	0	57.6394
2010-02-19 06:30:00	NA	NA	9	NA	NA	9	911.585	0.348298	0	NA	NA	9	NA	NA	9	2.70574	0.0144343	0	NA	NA	9	NA	NA	9	3.81936	0.00333902	0	NA	NA	9	42.9339	0.0460294	0	NA	NA	9	0.0267067	0.0199054	0	NA	NA	9	0.00592862	0.0121693	0	0.0305302	0.0189872	0	92.05
2010-02-19 07:30:00	NA	NA	9	NA	NA	9	912.005	0.374337	0	NA	NA	9	NA	NA	9	2.70913	0.0163455	0	NA	NA	9	NA	NA	9	3.81987	0.00388792	0	NA	NA	9	42.9355	0.047913	0	NA	NA	9	0.0151428	0.0118892	0	NA	NA	9	-0.00641013	0.0411993	0	0.0397744	0.0229434	0	96.7805
2010-02-19 08:30:00	NA	NA	9	NA	NA	9	912.746	0.351609	0	NA	NA	9	NA	NA	9	2.66234	0.0278551	0	NA	NA	9	NA	NA	9	3.81465	0.0037466	0	NA	NA	9	42.9315	0.0450784	0	NA	NA	9	-0.000824225	0.0430232	0	NA	NA	9	-0.105929	0.0592439	0	0.121717	0.0420166	0	186.38
2010-02-19 09:30:00	NA	NA	9	NA	NA	9	913.283	0.31339	0	NA	NA	9	NA	NA	9	2.69183	0.0244443	0	NA	NA	9	NA	NA	9	3.81647	0.00371328	0	NA	NA	9	42.9148	0.0394928	0	NA	NA	9	-0.0690158	0.0387771	0	NA	NA	9	0.0126779	0.0176003	0	0.0737355	0.0360574	0	281.931
2010-02-19 10:30:00	NA	NA	9	NA	NA	9	913.307	0.326845	0	NA	NA	9	NA	NA	9	2.75163	0.0226206	0	NA	NA	9	NA	NA	9	3.82261	0.00347138	0	NA	NA	9	42.9127	0.04204	0	NA	NA	9	-0.056645	0.0298227	0	NA	NA	9	0.00799481	0.0226789	0	0.0624886	0.0277692	0	276.328
2010-02-19 11:30:00	NA	NA	9	NA	NA	9	913.114	0.294012	0	NA	NA	9	NA	NA	9	2.79307	0.0198447	0	NA	NA	9	NA	NA	9	3.82526	0.00287812	0	NA	NA	9	42.8911	0.0429025	0	NA	NA	9	-0.0962906	0.0310869	0	NA	NA	9	-0.0259839	0.0290295	0	0.103776	0.0314045	0	257.161
2010-02-19 12:30:00	NA	NA	9	NA	NA	9	913.034	0.308835	0	NA	NA	9	NA	NA	9	2.80871	0.0161464	0	NA	NA	9	NA	NA	9	3.82832	0.00323191	0	NA	NA	9	42.9089	0.0418668	0	NA	NA	9	-0.0972462	0.0265719	0	NA	NA	9	-0.035955	0.0207256	0	0.105637	0.0269423	0	249.474
2010-02-19 13:30:00	NA	NA	9	NA	NA	9	912.588	0.356642	0	NA	NA	9	NA	NA	9	2.84283	0.0145892	0	NA	NA	9	NA	NA	9	3.83003	0.00329122	0	NA	NA	9	42.8853	0.0423124	0	NA	NA	9	-0.107869	0.0294978	0	NA	NA	9	-0.0283516	0.025905	0	0.114299	0.0302669	0	255.253
2010-02-19 14:30:00	NA	NA	9	NA	NA	9	912.048	0.3473	0	NA	NA	9	NA	NA	9	2.81888	0.0217691	0	NA	NA	9	NA	NA	9	3.82821	0.00369695	0	NA	NA	9	42.8946	0.0406727	0	NA	NA	9	-0.107643	0.0277944	0	NA	NA	9	-0.0312444	0.0234789	0	0.114211	0.0290255	0	254.062
2010-02-19 15:30:00	NA	NA	9	NA	NA	9	911.628	0.29764	0	NA	NA	9	NA	NA	9	2.78454	0.0123281	0	NA	NA	9	NA	NA	9	3.82548	0.00337558	0	NA	NA	9	42.9061	0.0422896	0	NA	NA	9	-0.0804605	0.0280782	0	NA	NA	9	-0.0135706	0.0205689	0	0.0839379	0.0287007	0	262.08
2010-02-19 16:30:00	NA	NA	9	NA	NA	9	911.197	0.317724	0	NA	NA	9	NA	NA	9	2.79492	0.0176021	0	NA	NA	9	NA	NA	9	3.82726	0.00367432	0	NA	NA	9	42.915	0.0465495	0	NA	NA	9	-0.0665661	0.0220691	0	NA	NA	9	-0.00258865	0.0229441	0	0.0709322	0.0204823	0	263.997
2010-02-19 17:30:00	NA	NA	9	NA	NA	9	910.954	0.349435	0	NA	NA	9	NA	NA	9	2.82696	0.0158038	0	NA	NA	9	NA	NA	9	3.83045	0.00394199	0	NA	NA	9	42.9127	0.0492159	0	NA	NA	9	-0.0174192	0.0215228	0	NA	NA	9	-0.00377088	0.0205178	0	0.0314868	0.0144937	0	218.745
2010-02-19 18:30:00	NA	NA	9	NA	NA	9	911.158	0.327842	0	NA	NA	9	NA	NA	9	2.7585	0.01766	0	NA	NA	9	NA	NA	9	3.82417	0.0039103	0	NA	NA	9	42.9245	0.0499798	0	NA	NA	9	0.0332765	0.0185154	0	NA	NA	9	0.0330683	0.0140359	0	0.0481762	0.0204853	0	60.0734
2010-02-19 19:30:00	NA	NA	9	NA	NA	9	911.471	0.339505	0	NA	NA	9	NA	NA	9	2.75741	0.0112017	0	NA	NA	9	NA	NA	9	3.82601	0.00430142	0	NA	NA	9	42.949	0.052287	0	NA	NA	9	0.00705543	0.0180349	0	NA	NA	9	-0.000853831	0.00921348	0	0.0189268	0.0101124	0	145.281
2010-02-19 20:30:00	NA	NA	9	NA	NA	9	911.991	0.351761	0	NA	NA	9	NA	NA	9	2.72089	0.0237583	0	NA	NA	9	NA	NA	9	3.82129	0.00400205	0	NA	NA	9	42.9378	0.0429759	0	NA	NA	9	0.0227548	0.0231244	0	NA	NA	9	-0.00294259	0.0193855	0	0.0337807	0.0171902	0	121.63
2010-02-19 21:30:00	NA	NA	9	NA	NA	9	912.251	0.314638	0	NA	NA	9	NA	NA	9	2.72524	0.0119266	0	NA	NA	9	NA	NA	9	3.82456	0.00408839	0	NA	NA	9	42.9731	0.051858	0	NA	NA	9	-0.0105401	0.00696885	0	NA	NA	9	-0.013675	0.00874498	0	0.0190463	0.00776803	0	221.578
2010-02-19 22:30:00	NA	NA	9	NA	NA	9	912.541	0.314325	0	NA	NA	9	NA	NA	9	2.73596	0.014888	0	NA	NA	9	NA	NA	9	3.82684	0.00438391	0	NA	NA	9	42.9873	0.0550723	0	NA	NA	9	-0.00339703	0.00774378	0	NA	NA	9	-0.0090002	0.00559221	0	0.0118965	0.00649833	0	190.733
2010-02-19 23:30:00	NA	NA	9	NA	NA	9	912.69	0.314571	0	NA	NA	9	NA	NA	9	2.72233	0.0105701	0	NA	NA	9	NA	NA	9	3.82619	0.00423125	0	NA	NA	9	42.9972	0.0564995	0	NA	NA	9	-0.0175558	0.00629304	0	NA	NA	9	-0.000448278	0.00610679	0	0.0187232	0.00589257	0	272.187
2010-02-20 00:30:00	NA	NA	9	NA	NA	9	912.676	0.310934	0	NA	NA	9	NA	NA	9	2.71618	0.0203923	0	NA	NA	9	NA	NA	9	3.82546	0.00436426	0	NA	NA	9	42.9962	0.0563294	0	NA	NA	9	-0.0105519	0.00521132	0	NA	NA	9	0.0048104	0.00631627	0	0.0130594	0.00556484	0	292.721
2010-02-20 01:30:00	NA	NA	9	NA	NA	9	912.613	0.300658	0	NA	NA	9	NA	NA	9	2.65093	0.0161798	0	NA	NA	9	NA	NA	9	3.81703	0.00411437	0	NA	NA	9	42.9769	0.0512163	0	NA	NA	9	-0.0148481	0.012745	0	NA	NA	9	0.0194499	0.0109968	0	0.029206	0.00538518	0	262.624
2010-02-20 02:30:00	NA	NA	9	NA	NA	9	912.29	0.350982	0	NA	NA	9	NA	NA	9	2.67702	0.0170152	0	NA	NA	9	NA	NA	9	3.81811	0.00390978	0	NA	NA	9	42.9558	0.0520428	0	NA	NA	9	-0.0401066	0.00782728	0	NA	NA	9	-0.010841	0.0200372	0	0.0458237	0.00942348	0	257.503
2010-02-20 03:30:00	NA	NA	9	NA	NA	9	911.97	0.318907	0	NA	NA	9	NA	NA	9	2.64658	0.0302051	0	NA	NA	9	NA	NA	9	3.81517	0.00453014	0	NA	NA	9	42.9595	0.0465168	0	NA	NA	9	0.00352532	0.0186239	0	NA	NA	9	-0.00572802	0.018148	0	0.0258259	0.00735649	0	167.584
2010-02-20 04:30:00	NA	NA	9	NA	NA	9	911.599	0.320053	0	NA	NA	9	NA	NA	9	2.70146	0.0273957	0	NA	NA	9	NA	NA	9	3.82152	0.00433821	0	NA	NA	9	42.9668	0.0556702	0	NA	NA	9	-0.0333497	0.015124	0	NA	NA	9	-0.0133288	0.00573614	0	0.0363563	0.0151559	0	246.236
2010-02-20 05:30:00	NA	NA	9	NA	NA	9	911.607	0.314023	0	NA	NA	9	NA	NA	9	2.73243	0.0178296	0	NA	NA	9	NA	NA	9	3.82123	0.00335087	0	NA	NA	9	42.9219	0.0417318	0	NA	NA	9	-0.0751654	0.0201816	0	NA	NA	9	-0.0287679	0.013144	0	0.0813027	0.021149	0	249.015
2010-02-20 06:30:00	NA	NA	9	NA	NA	9	911.784	0.300809	0	NA	NA	9	NA	NA	9	2.73806	0.019051	0	NA	NA	9	NA	NA	9	3.82089	0.00334568	0	NA	NA	9	42.9099	0.0441797	0	NA	NA	9	-0.0780595	0.0225766	0	NA	NA	9	-0.0175055	0.0178065	0	0.0819326	0.0226576	0	256.907
2010-02-20 07:30:00	NA	NA	9	NA	NA	9	912.129	0.33907	0	NA	NA	9	NA	NA	9	2.728	0.0135684	0	NA	NA	9	NA	NA	9	3.81992	0.00310495	0	NA	NA	9	42.9109	0.0416002	0	NA	NA	9	-0.1278	0.0308381	0	NA	NA	9	-0.0321266	0.0212207	0	0.133613	0.0302259	0	255.422
2010-02-20 08:30:00	NA	NA	9	NA	NA	9	912.549	0.372034	0	NA	NA	9	NA	NA	9	2.70034	0.0227682	0	NA	NA	9	NA	NA	9	3.81806	0.00330194	0	NA	NA	9	42.9241	0.0404876	0	NA	NA	9	-0.161046	0.0296715	0	NA	NA	9	-0.0191861	0.0201529	0	0.163583	0.0288231	0	262.869
2010-02-20 09:30:00	NA	NA	9	NA	NA	9	913.064	0.30385	0	NA	NA	9	NA	NA	9	2.70773	0.017501	0	NA	NA	9	NA	NA	9	3.8189	0.00331953	0	NA	NA	9	42.9244	0.041916	0	NA	NA	9	-0.12892	0.0291092	0	NA	NA	9	-0.0279445	0.0234316	0	0.134411	0.0270349	0	256.848
2010-02-20 10:30:00	NA	NA	9	NA	NA	9	913.281	0.309713	0	NA	NA	9	NA	NA	9	2.75911	0.022183	0	NA	NA	9	NA	NA	9	3.82369	0.0033245	0	NA	NA	9	42.9164	0.0402342	0	NA	NA	9	-0.0849574	0.0247684	0	NA	NA	9	-0.0309172	0.0167074	0	0.092025	0.0244436	0	249.379
2010-02-20 11:30:00	NA	NA	9	NA	NA	9	913.41	0.299735	0	NA	NA	9	NA	NA	9	2.78528	0.0176976	0	NA	NA	9	NA	NA	9	3.82683	0.00356585	0	NA	NA	9	42.9209	0.0455919	0	NA	NA	9	-0.0669548	0.0249838	0	NA	NA	9	-0.0487802	0.0178539	0	0.0838181	0.0279255	0	233.104
2010-02-20 12:30:00	NA	NA	9	NA	NA	9	913.234	0.319252	0	NA	NA	9	NA	NA	9	2.79842	0.0177488	0	NA	NA	9	NA	NA	9	3.82968	0.0042256	0	NA	NA	9	42.9395	0.0514888	0	NA	NA	9	-0.0305184	0.0118325	0	NA	NA	9	-0.0180584	0.0182386	0	0.037434	0.0181315	0	246.084
2010-02-20 13:30:00	NA	NA	9	NA	NA	9	912.807	0.35771	0	NA	NA	9	NA	NA	9	2.83704	0.012885	0	NA	NA	9	NA	NA	9	3.83286	0.00382191	0	NA	NA	9	42.9284	0.0503986	0	NA	NA	9	0.00343953	0.0211302	0	NA	NA	9	0.0077724	0.0109844	0	0.0210001	0.0140773	0	149.913
2010-02-20 14:30:00	NA	NA	9	NA	NA	9	912.61	0.312767	0	NA	NA	9	NA	NA	9	2.73463	0.0465363	0	NA	NA	9	NA	NA	9	3.82189	0.00552717	0	NA	NA	9	42.9267	0.0471393	0	NA	NA	9	0.0765289	0.0232166	0	NA	NA	9	0.0154304	0.0131537	0	0.079656	0.0214844	0	76.8909
2010-02-20 15:30:00	NA	NA	9	NA	NA	9	912.059	0.343815	0	NA	NA	9	NA	NA	9	2.74557	0.0194222	0	NA	NA	9	NA	NA	9	3.82297	0.00333864	0	NA	NA	9	42.926	0.0457034	0	NA	NA	9	0.0356481	0.0230985	0	NA	NA	9	0.0536904	0.0280521	0	0.0708386	0.021338	0	66.7426
2010-02-20 16:30:00	NA	NA	9	NA	NA	9	911.721	0.312438	0	NA	NA	9	NA	NA	9	2.69786	0.0166099	0	NA	NA	9	NA	NA	9	3.81884	0.00369307	0	NA	NA	9	42.9377	0.0498274	0	NA	NA	9	0.0440163	0.0241511	0	NA	NA	9	0.0271795	0.0211988	0	0.0571826	0.0209439	0	59.1217
2010-02-20 17:30:00	NA	NA	9	NA	NA	9	911.343	0.337876	0	NA	NA	9	NA	NA	9	2.68185	0.017116	0	NA	NA	9	NA	NA	9	3.81836	0.00373916	0	NA	NA	9	42.9533	0.045777	0	NA	NA	9	0.000887172	0.0261698	0	NA	NA	9	-0.0133174	0.0178745	0	0.0306723	0.0155334	0	183.202
2010-02-20 18:30:00	NA	NA	9	NA	NA	9	911.233	0.326947	0	NA	NA	9	NA	NA	9	2.6959	0.0138511	0	NA	NA	9	NA	NA	9	3.8211	0.00421698	0	NA	NA	9	42.9692	0.0511938	0	NA	NA	9	-0.0222832	0.0163676	0	NA	NA	9	-0.00972013	0.0161715	0	0.0277445	0.0187237	0	244.953
2010-02-20 19:30:00	NA	NA	9	NA	NA	9	911.387	0.340944	0	NA	NA	9	NA	NA	9	2.68587	0.0279007	0	NA	NA	9	NA	NA	9	3.81685	0.00371804	0	NA	NA	9	42.9288	0.0422545	0	NA	NA	9	-0.130964	0.0383877	0	NA	NA	9	-0.0182271	0.0200488	0	0.133815	0.038115	0	261.967
2010-02-20 20:30:00	NA	NA	9	NA	NA	9	911.605	0.302832	0	NA	NA	9	NA	NA	9	2.74082	0.0408913	0	NA	NA	9	NA	NA	9	3.82178	0.00458768	0	NA	NA	9	42.9177	0.0417001	0	NA	NA	9	-0.141938	0.0340464	0	NA	NA	9	-0.0180766	0.0225498	0	0.144822	0.0341633	0	262.93
2010-02-20 21:30:00	NA	NA	9	NA	NA	9	911.91	0.349382	0	NA	NA	9	NA	NA	9	2.74066	0.025096	0	NA	NA	9	NA	NA	9	3.82164	0.00320133	0	NA	NA	9	42.9159	0.0396403	0	NA	NA	9	-0.134426	0.0270722	0	NA	NA	9	-0.0458397	0.0235638	0	0.14389	0.0274802	0	251.113
2010-02-20 22:30:00	NA	NA	9	NA	NA	9	912.236	0.351953	0	NA	NA	9	NA	NA	9	2.75658	0.0136036	0	NA	NA	9	NA	NA	9	3.82274	0.0032361	0	NA	NA	9	42.9083	0.0403968	0	NA	NA	9	-0.12417	0.026424	0	NA	NA	9	-0.0393022	0.0190279	0	0.13194	0.0247915	0	251.835
2010-02-20 23:30:00	NA	NA	9	NA	NA	9	912.473	0.311915	0	NA	NA	9	NA	NA	9	2.76709	0.0125986	0	NA	NA	9	NA	NA	9	3.82385	0.00311355	0	NA	NA	9	42.9082	0.0391574	0	NA	NA	9	-0.100418	0.0228875	0	NA	NA	9	-0.0576843	0.0224619	0	0.116899	0.0278255	0	240.845
2010-02-21 00:30:00	NA	NA	9	NA	NA	9	912.51	0.293183	0	NA	NA	9	NA	NA	9	2.80461	0.0143784	0	NA	NA	9	NA	NA	9	3.82737	0.00311146	0	NA	NA	9	42.9026	0.0416326	0	NA	NA	9	-0.0584303	0.0225765	0	NA	NA	9	0.00858538	0.0183002	0	0.0621601	0.0216404	0	278.685
2010-02-21 01:30:00	NA	NA	9	NA	NA	9	912.366	0.32291	0	NA	NA	9	NA	NA	9	2.83453	0.012346	0	NA	NA	9	NA	NA	9	3.83137	0.00408643	0	NA	NA	9	42.9133	0.0531729	0	NA	NA	9	-0.0432356	0.0116209	0	NA	NA	9	-0.0142092	0.0119713	0	0.047379	0.0102331	0	250.578
2010-02-21 02:30:00	NA	NA	9	NA	NA	9	912.192	0.29227	0	NA	NA	9	NA	NA	9	2.84648	0.0199704	0	NA	NA	9	NA	NA	9	3.83301	0.00453858	0	NA	NA	9	42.9181	0.0500979	0	NA	NA	9	0.0230047	0.0300506	0	NA	NA	9	0.0264716	0.0236158	0	0.0424661	0.0297828	0	76.2983
2010-02-21 03:30:00	NA	NA	9	NA	NA	9	912.123	0.318599	0	NA	NA	9	NA	NA	9	2.74193	0.020506	0	NA	NA	9	NA	NA	9	3.82267	0.00396276	0	NA	NA	9	42.9271	0.0493785	0	NA	NA	9	0.0280436	0.023037	0	NA	NA	9	0.0383159	0.0334607	0	0.055919	0.0278829	0	80.8429
[truncated: 59,708 more rows]
[truncated: 8 more columns]

## Sheet: Table S2
Time (UTC)	Pressure (dbar)	Temperature (°C)	Conductivity (S/m)	Salinity (psu)	Current Magnitude (m/s)	Current Direction (°)	Turbidity (FTU)	Chlorophyl (μg/l)
[truncated: 61,344 more rows]

[truncated: 1 more sheets: Table S3]
